# Supplementary material
Source: ML conference proceedings conference paper supplement (https://openreview.net/forum?id=h40Nyr36om)

# **NMF Enrichment Analysis**

All Programs Combined

$k = 10$  to  $50$  (41 analyses)

k = 10

Enrichment Analysis: All Programs (k=10)

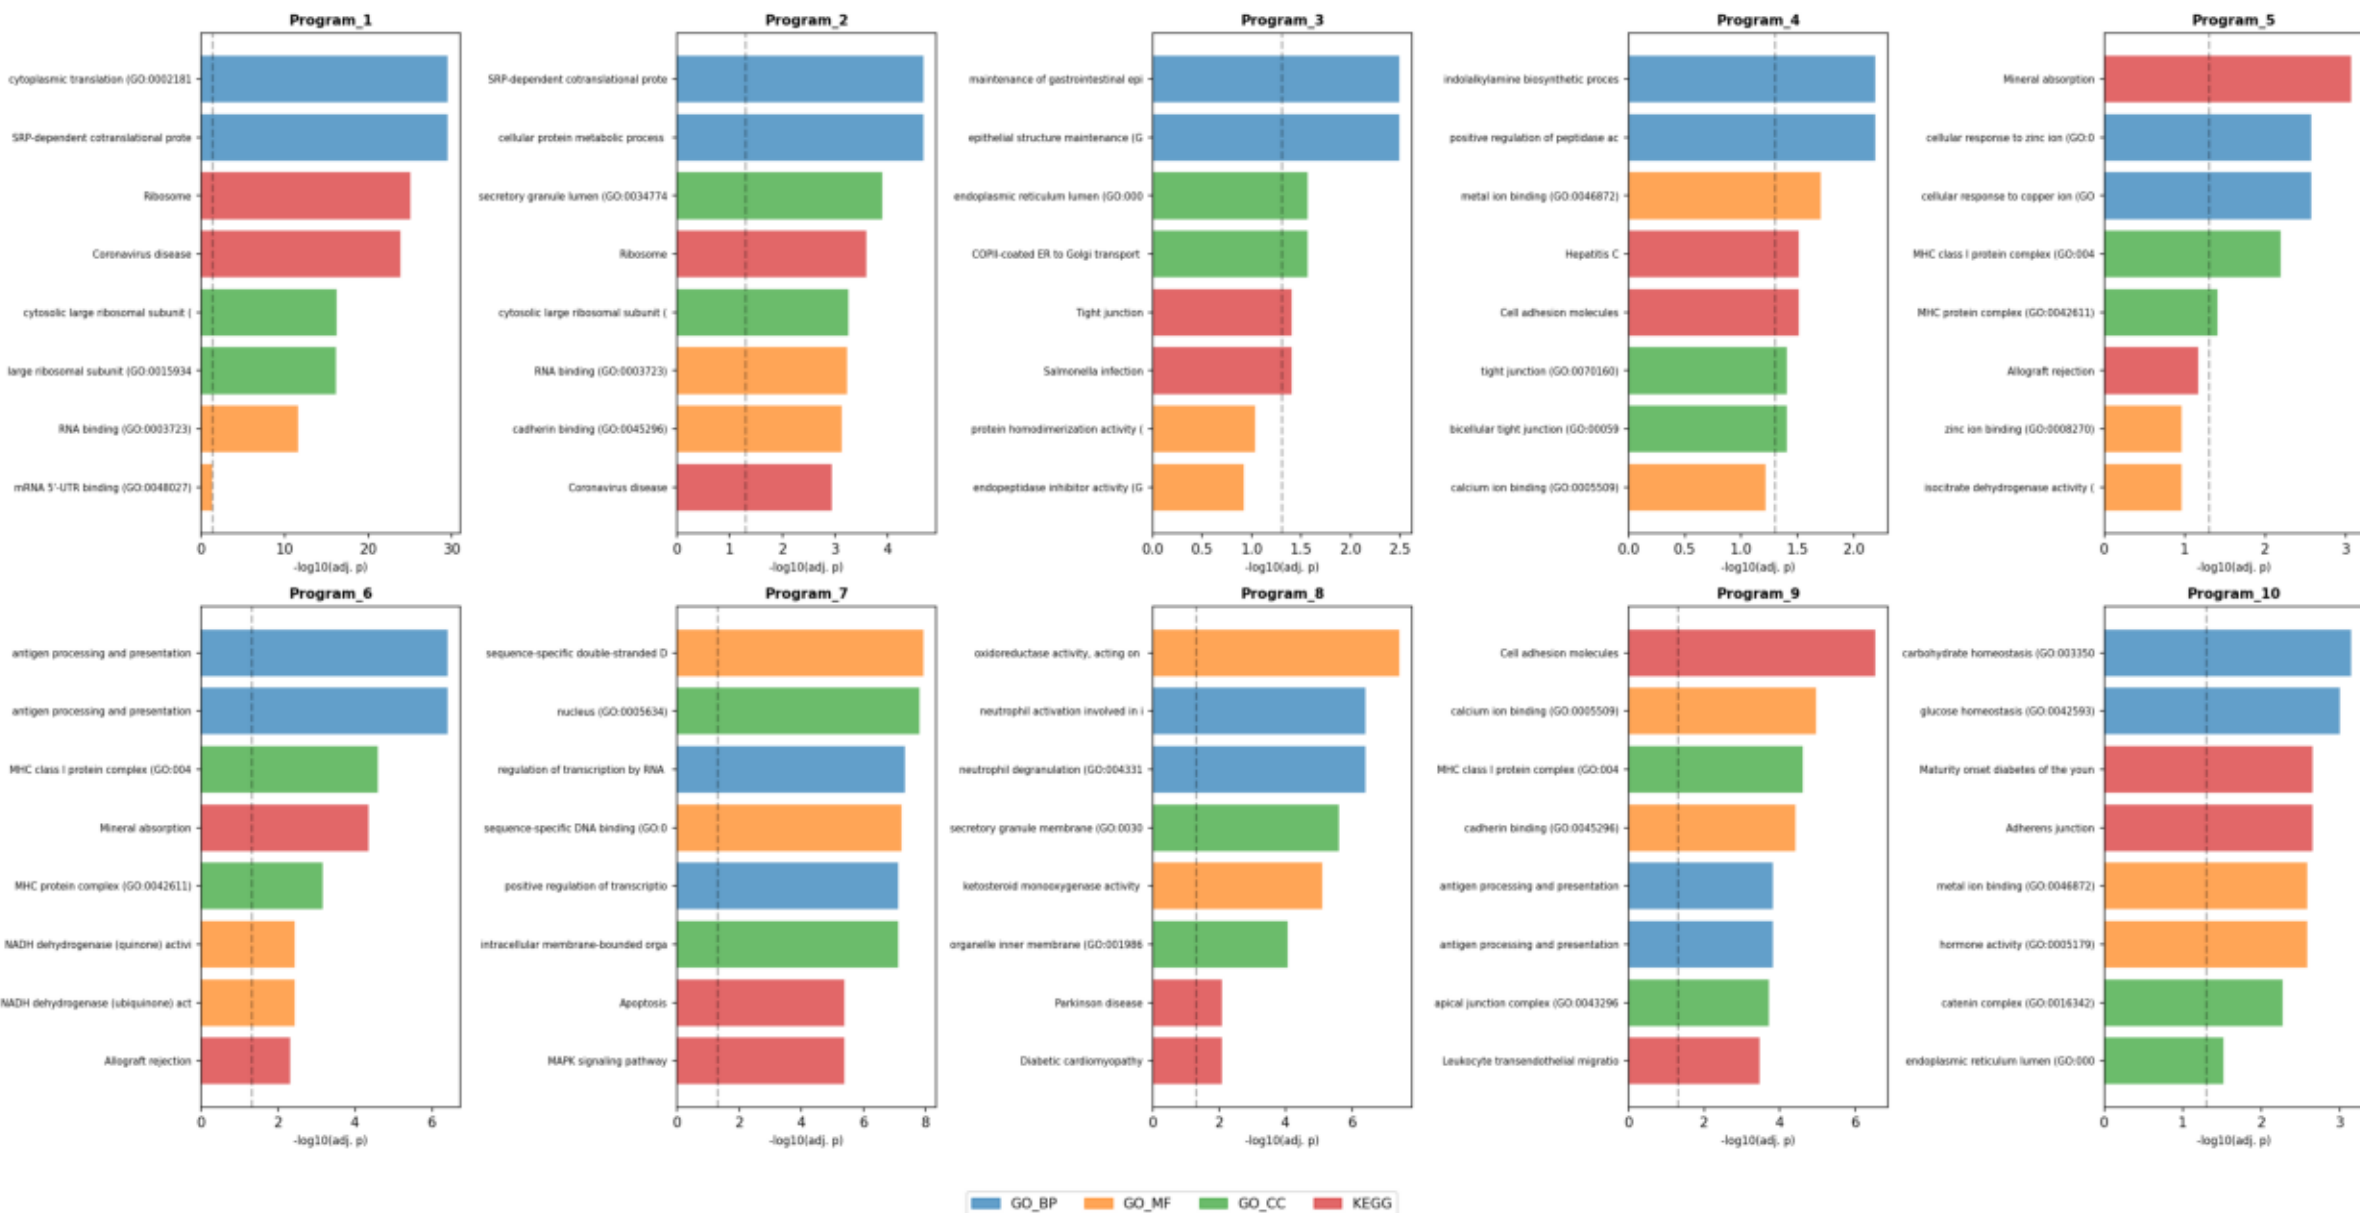

k = 11

Enrichment Analysis: All Programs (k=11)

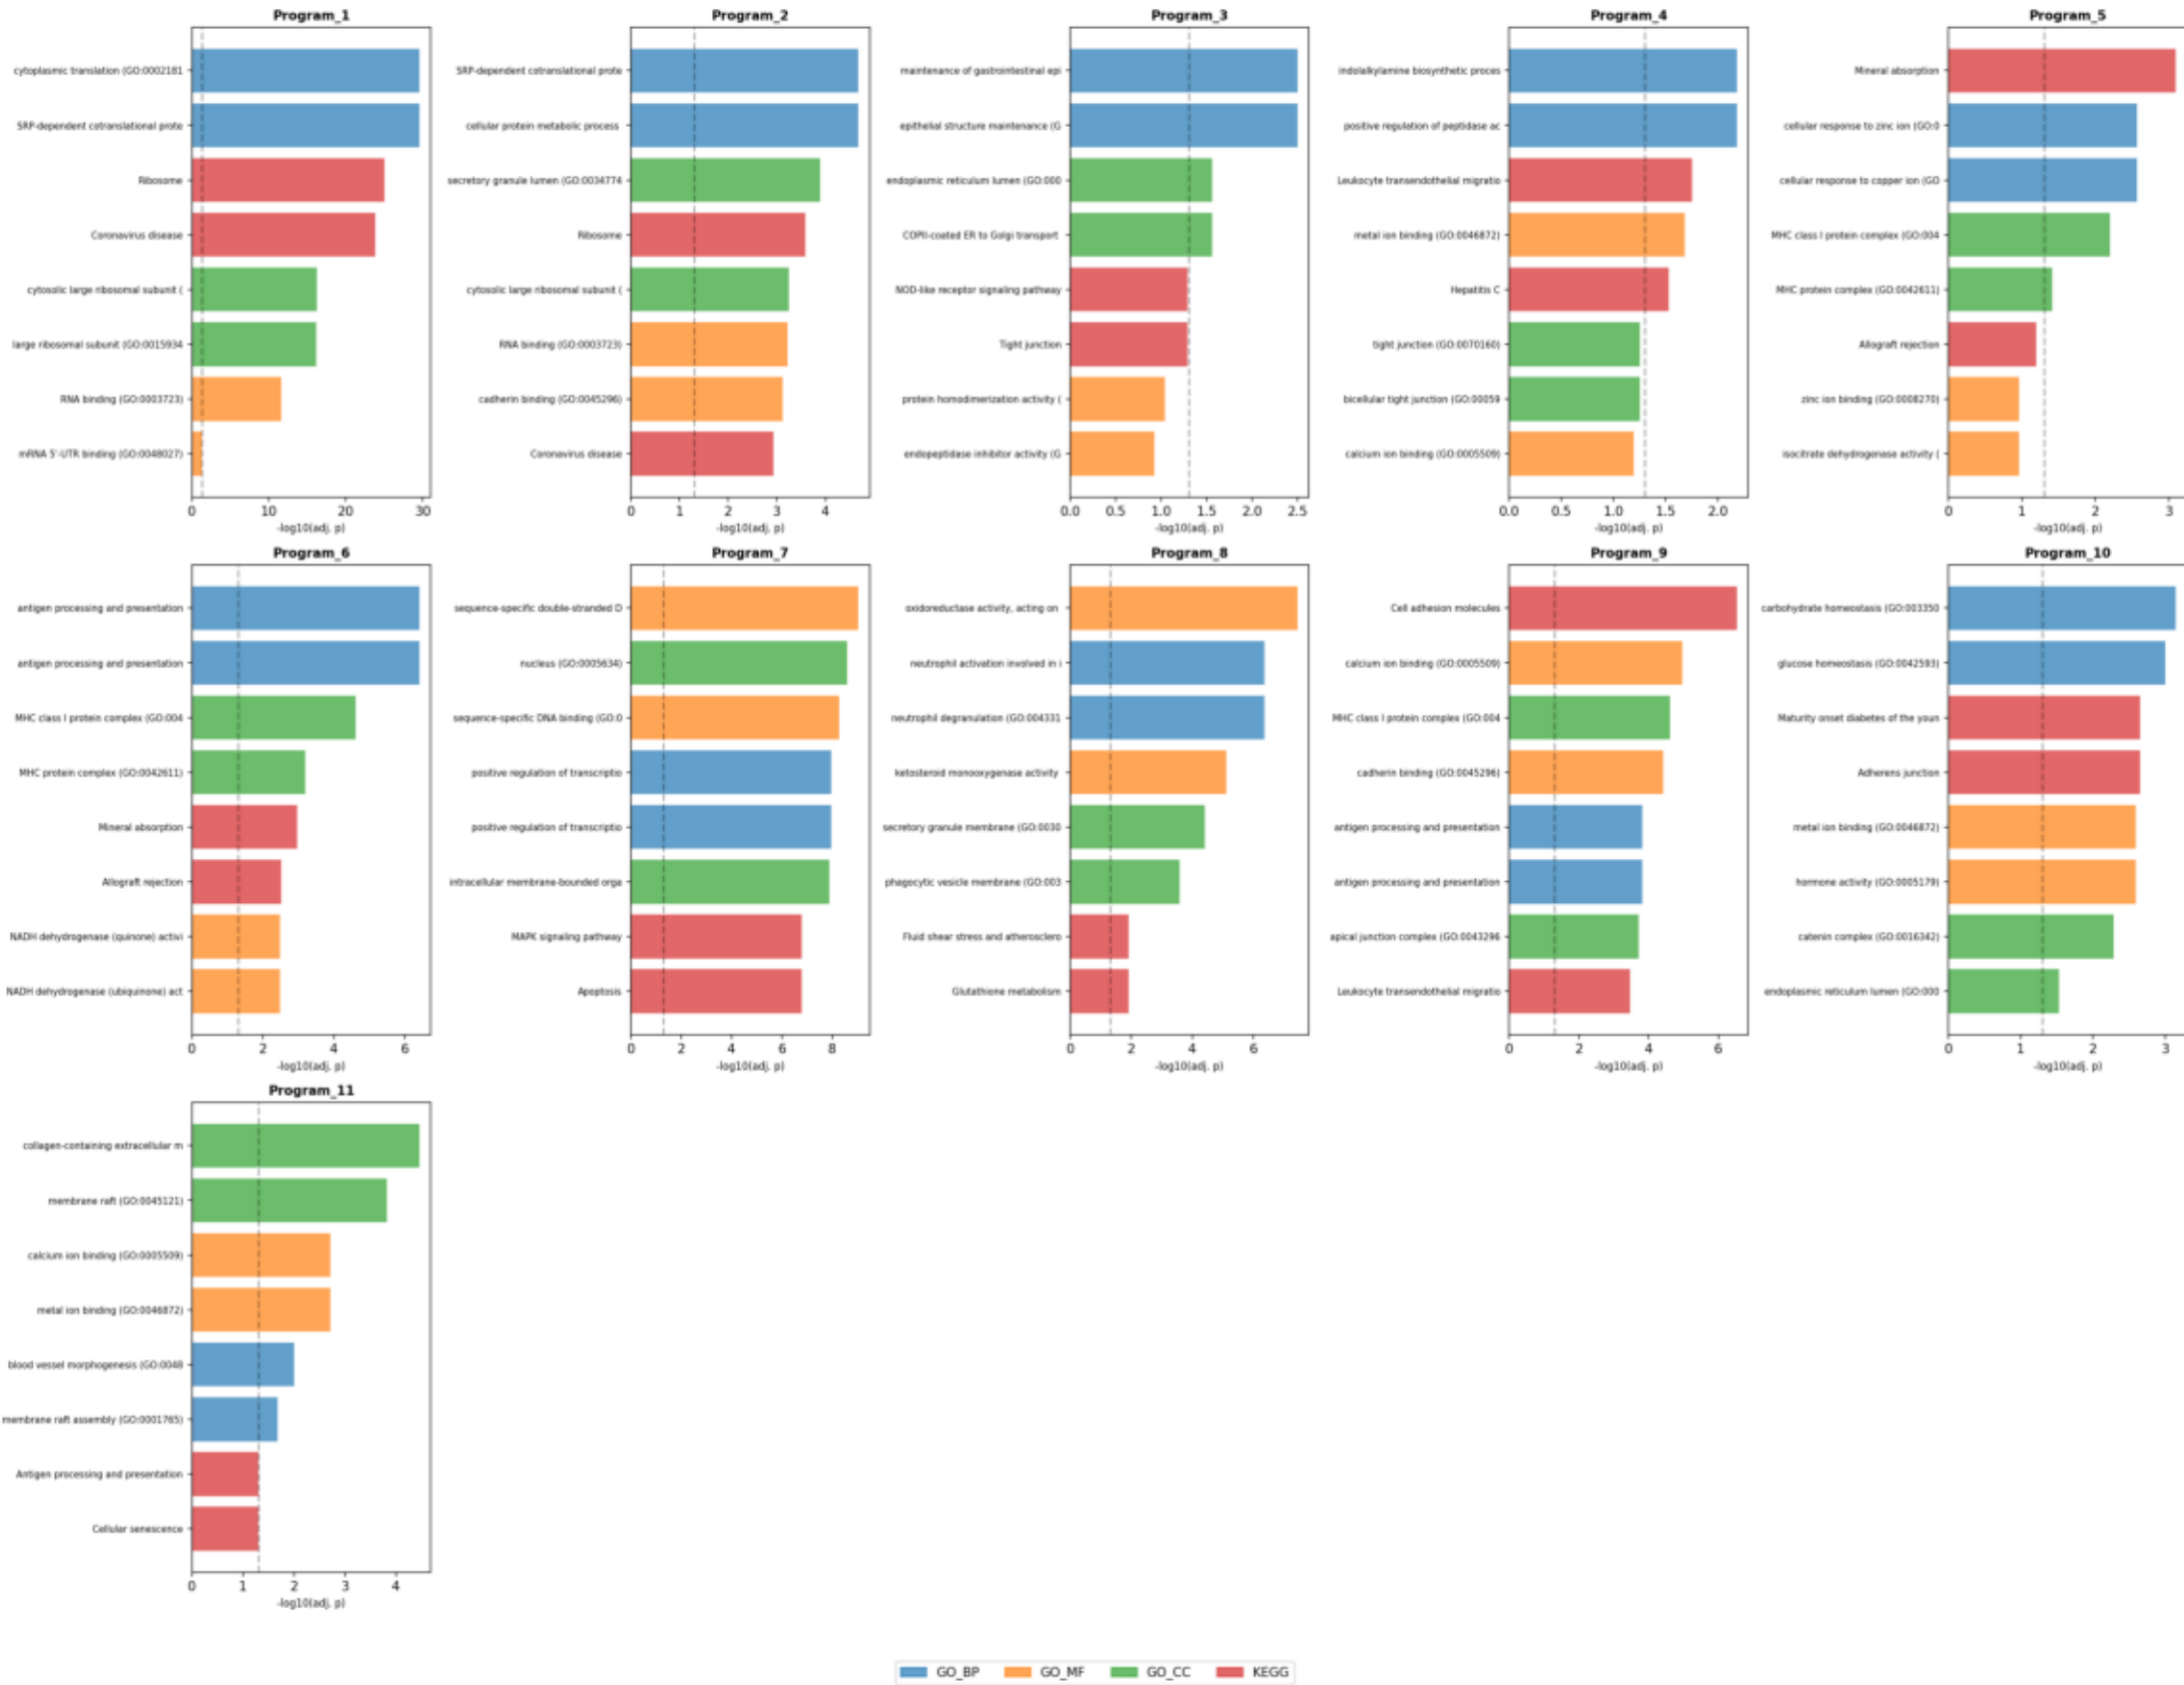

k = 12

### Enrichment Analysis: All Programs (k=12)

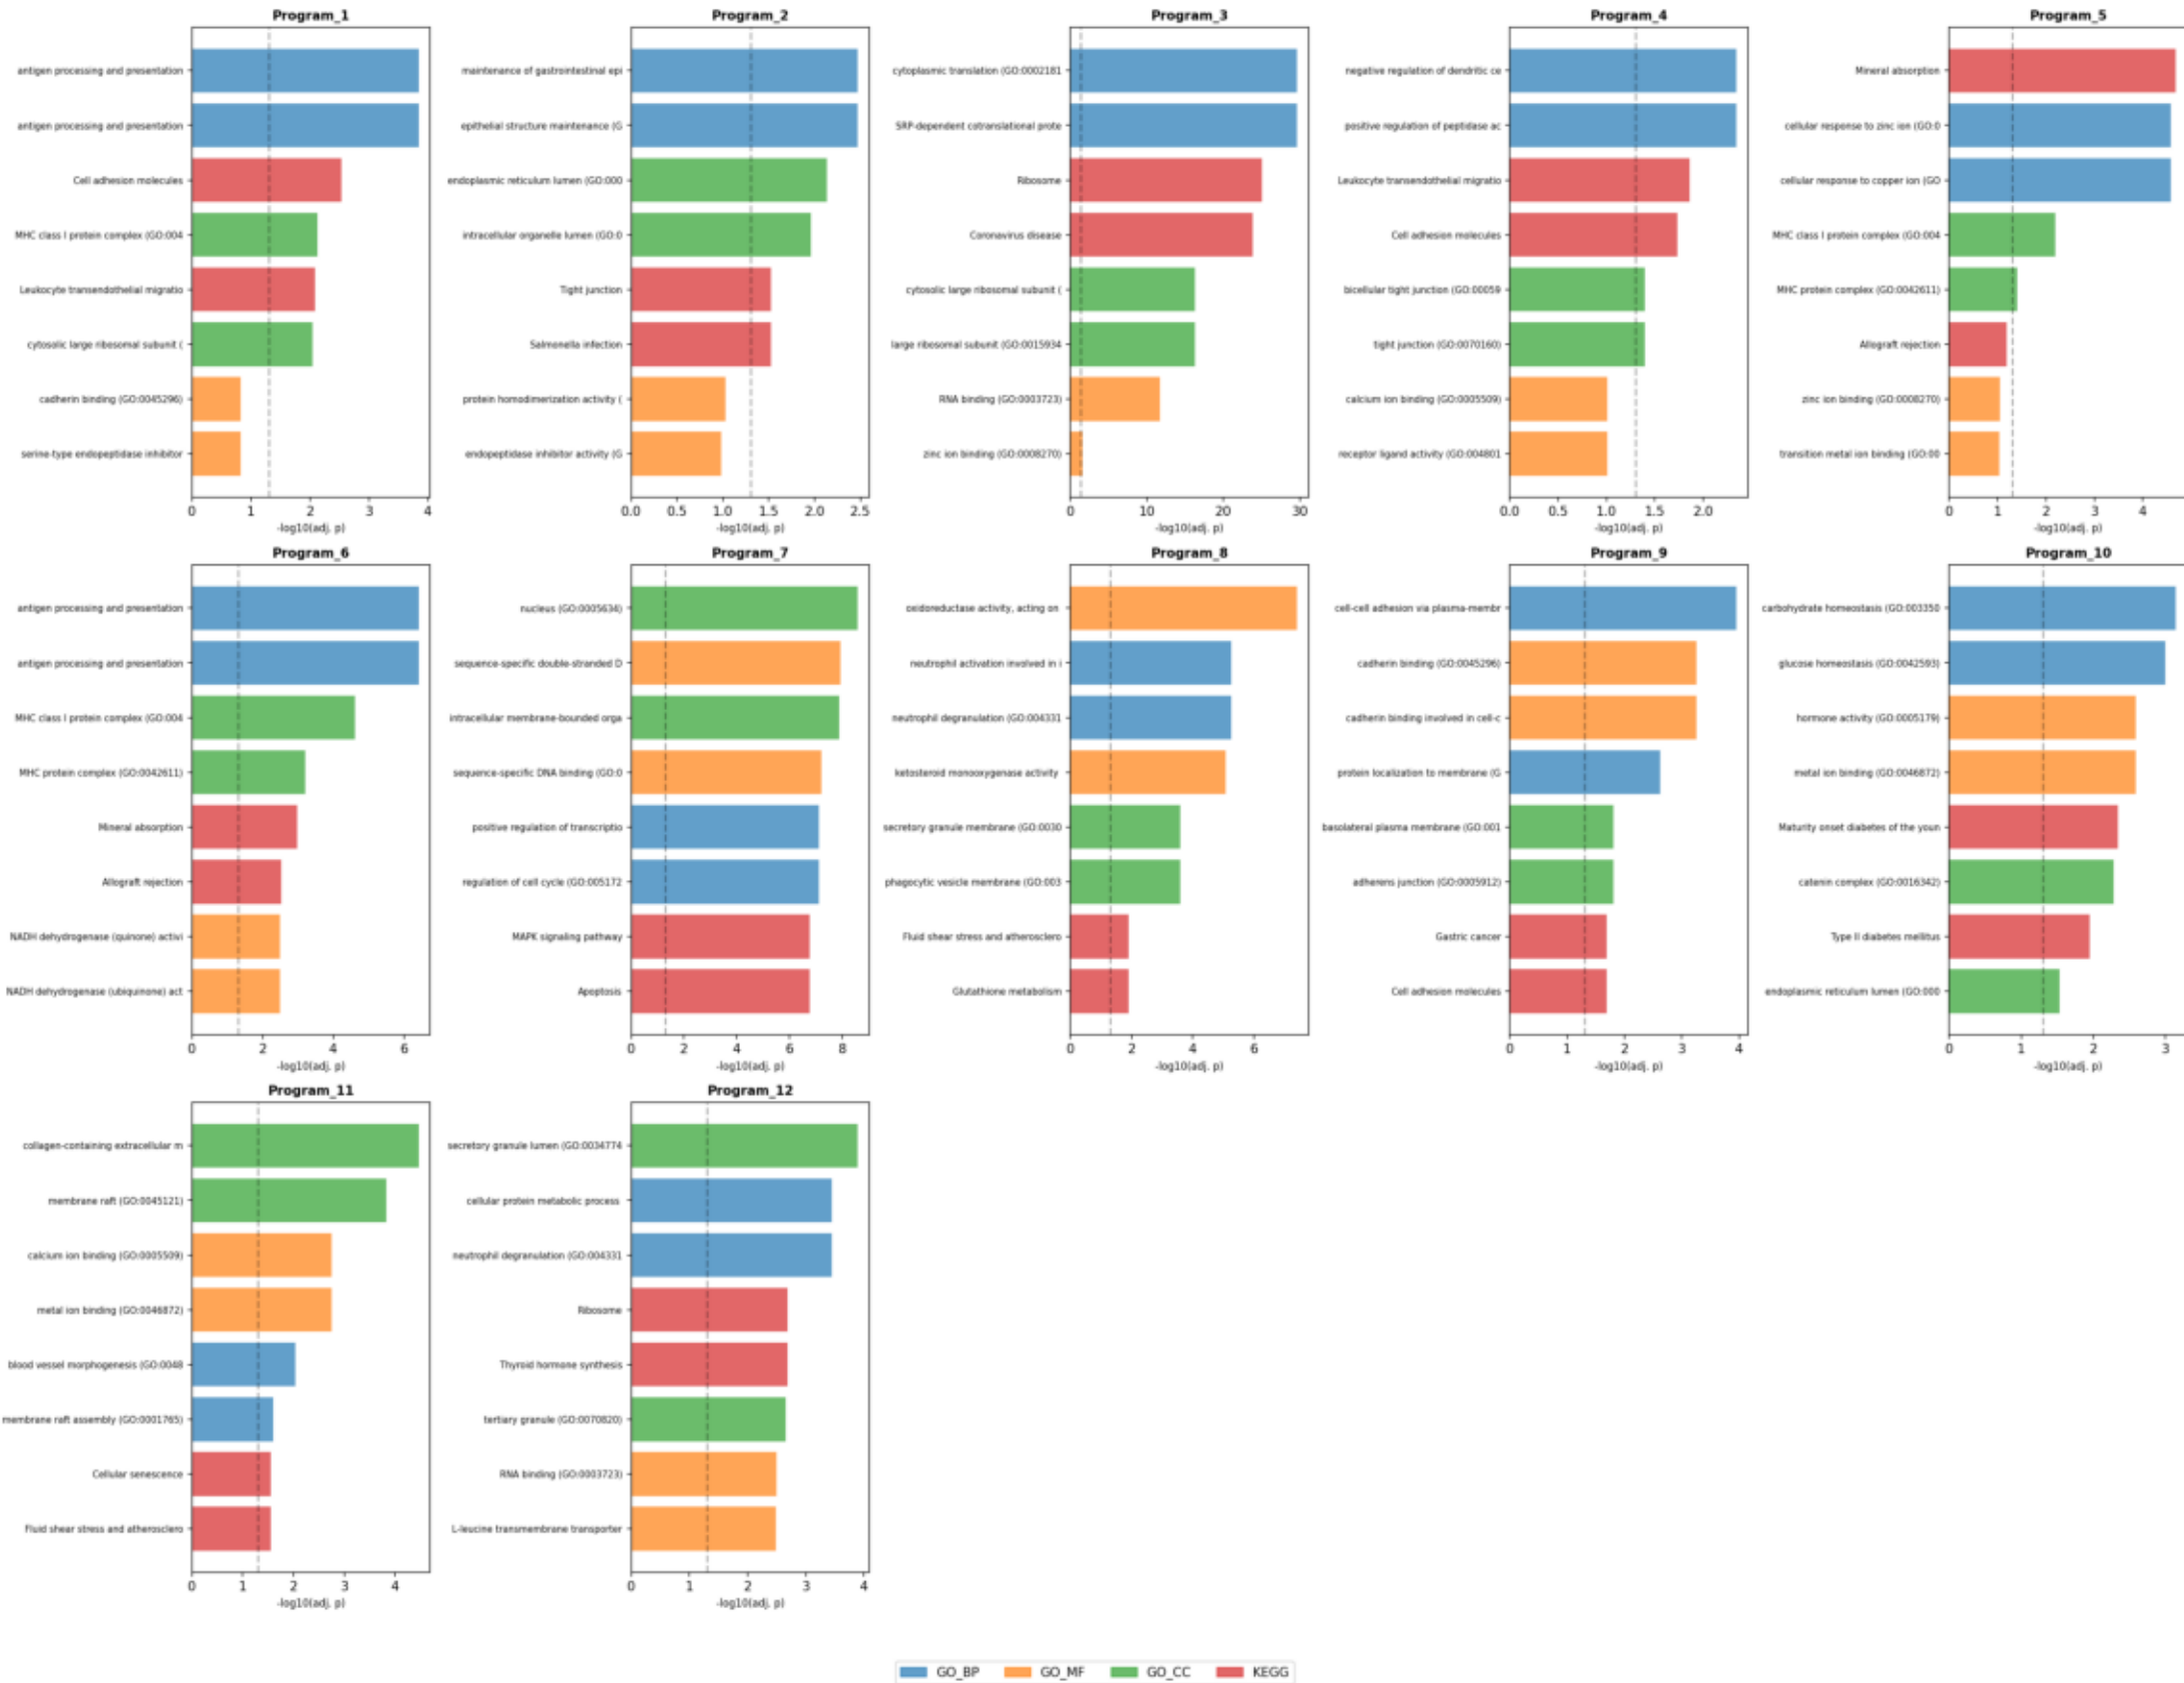

k = 13

Enrichment Analysis: All Programs (k=13)

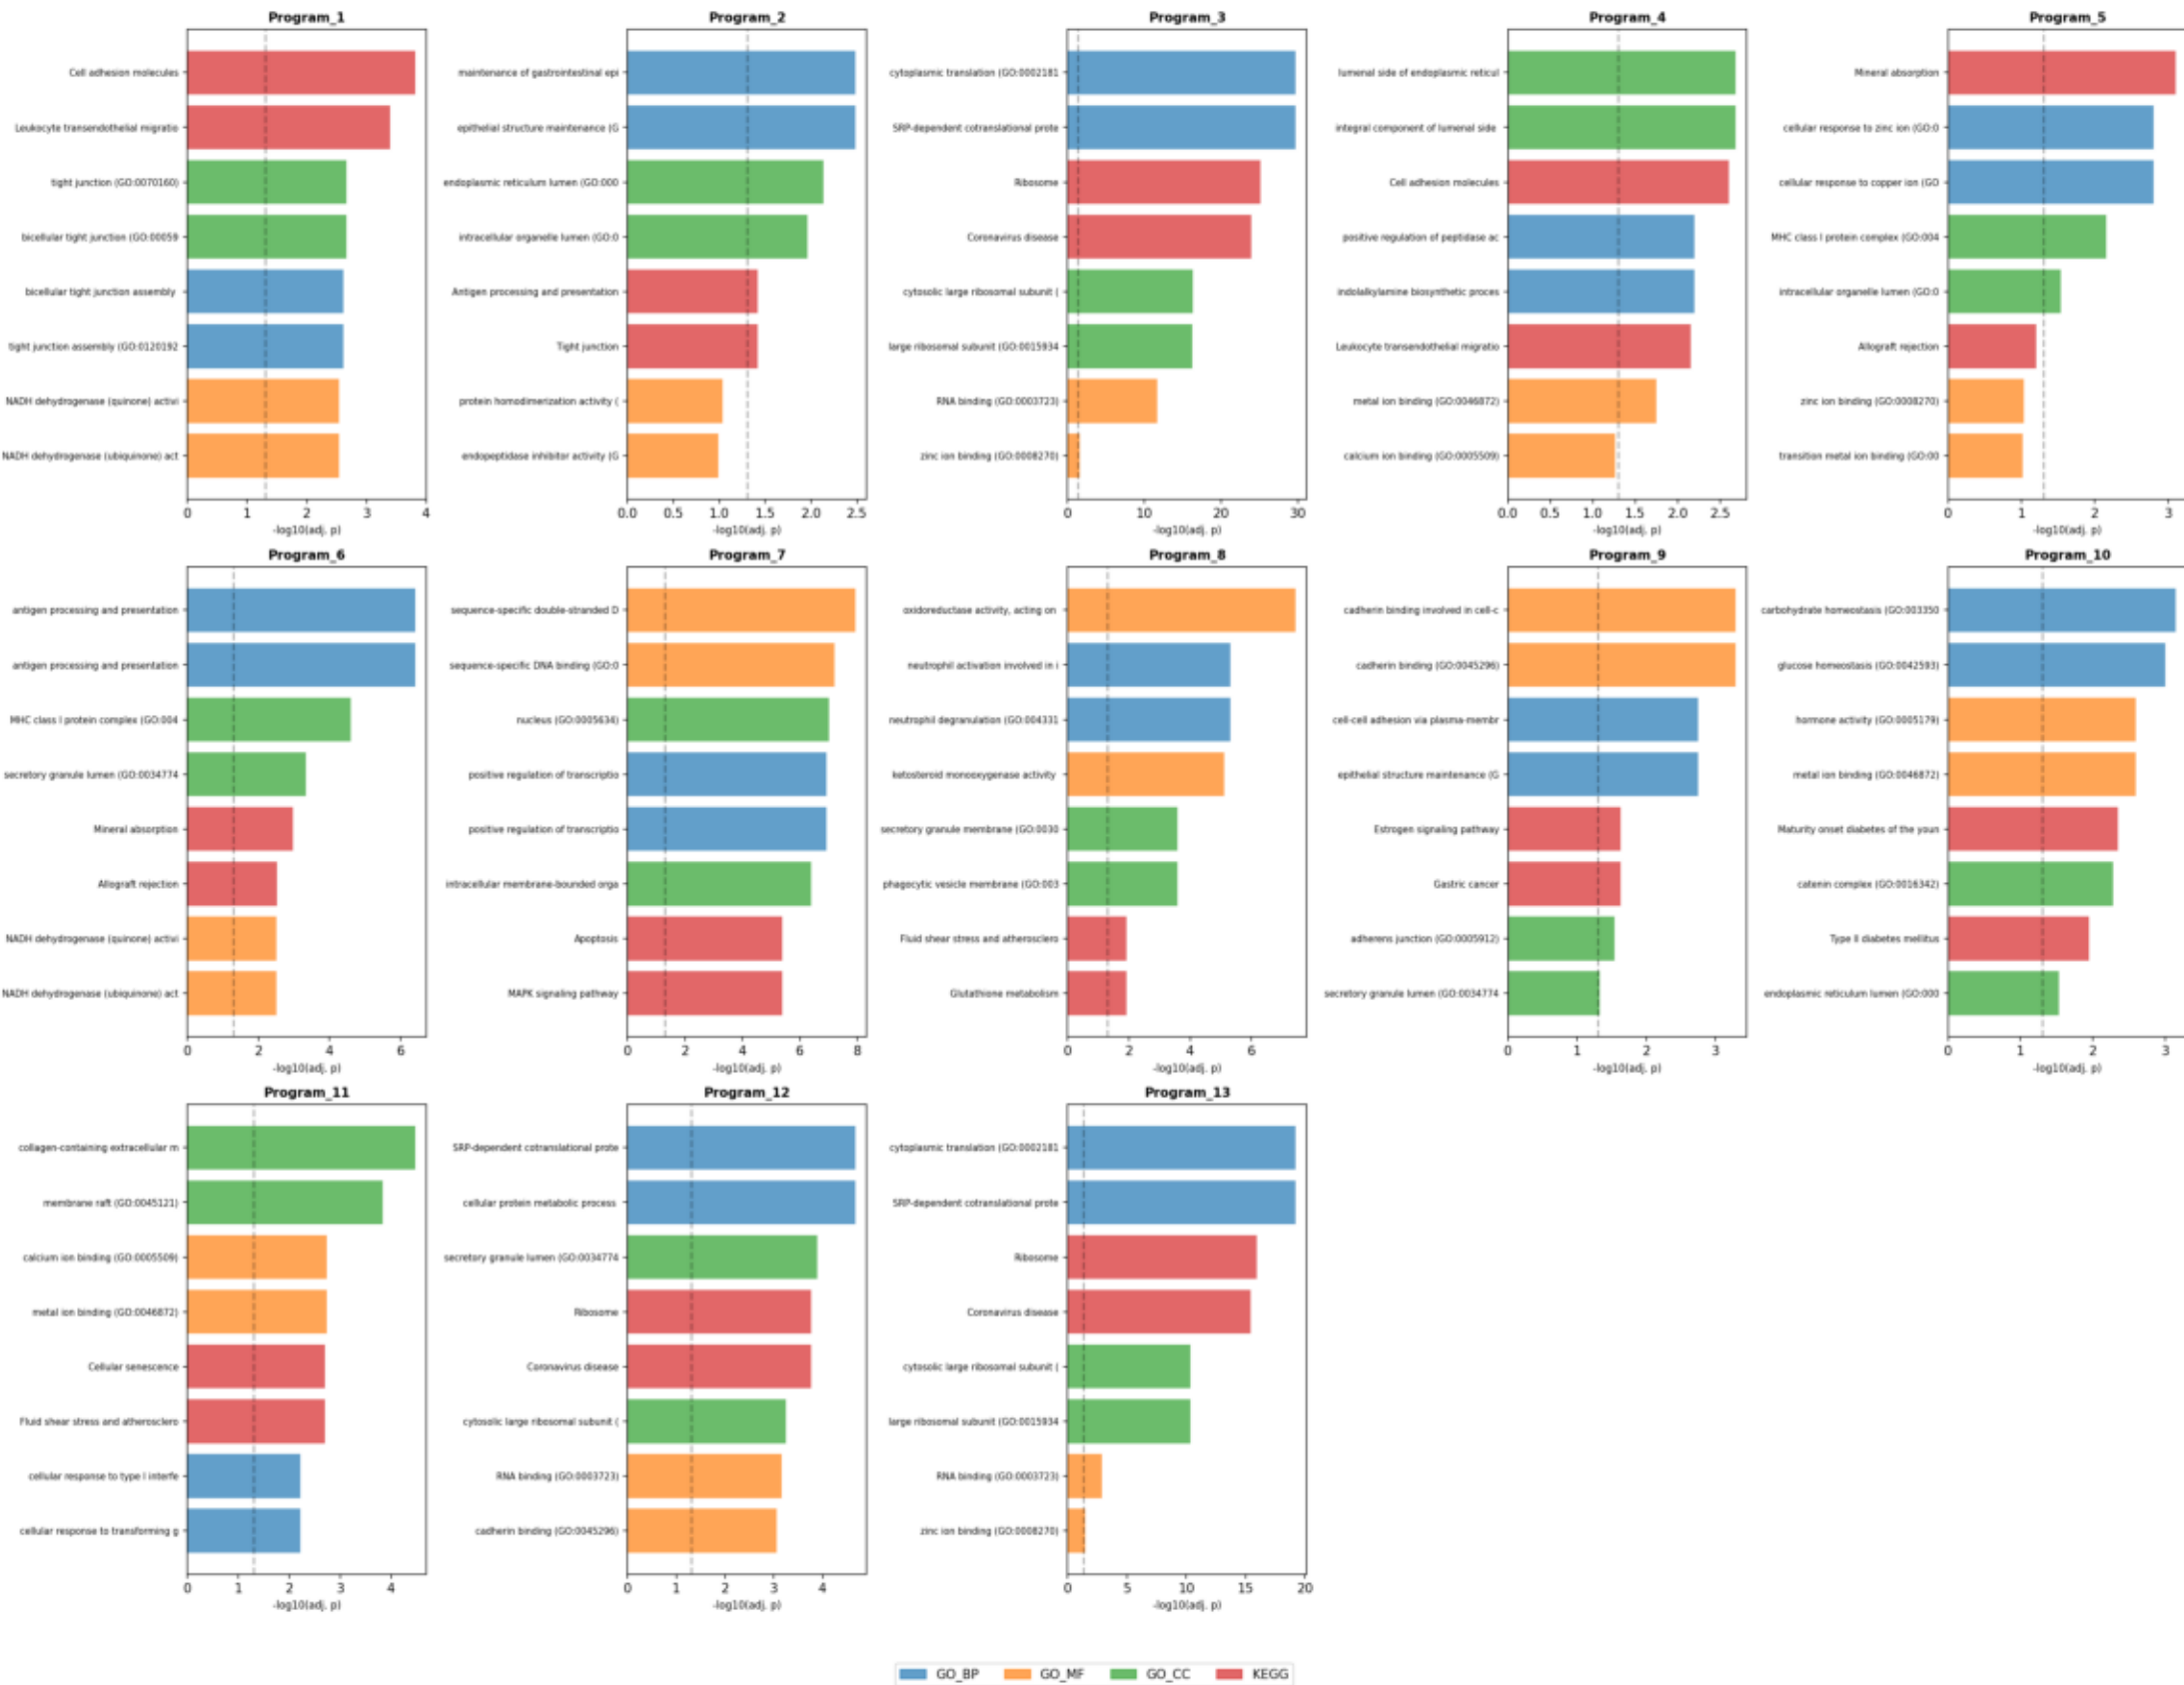

k = 14

Enrichment Analysis: All Programs (k=14)

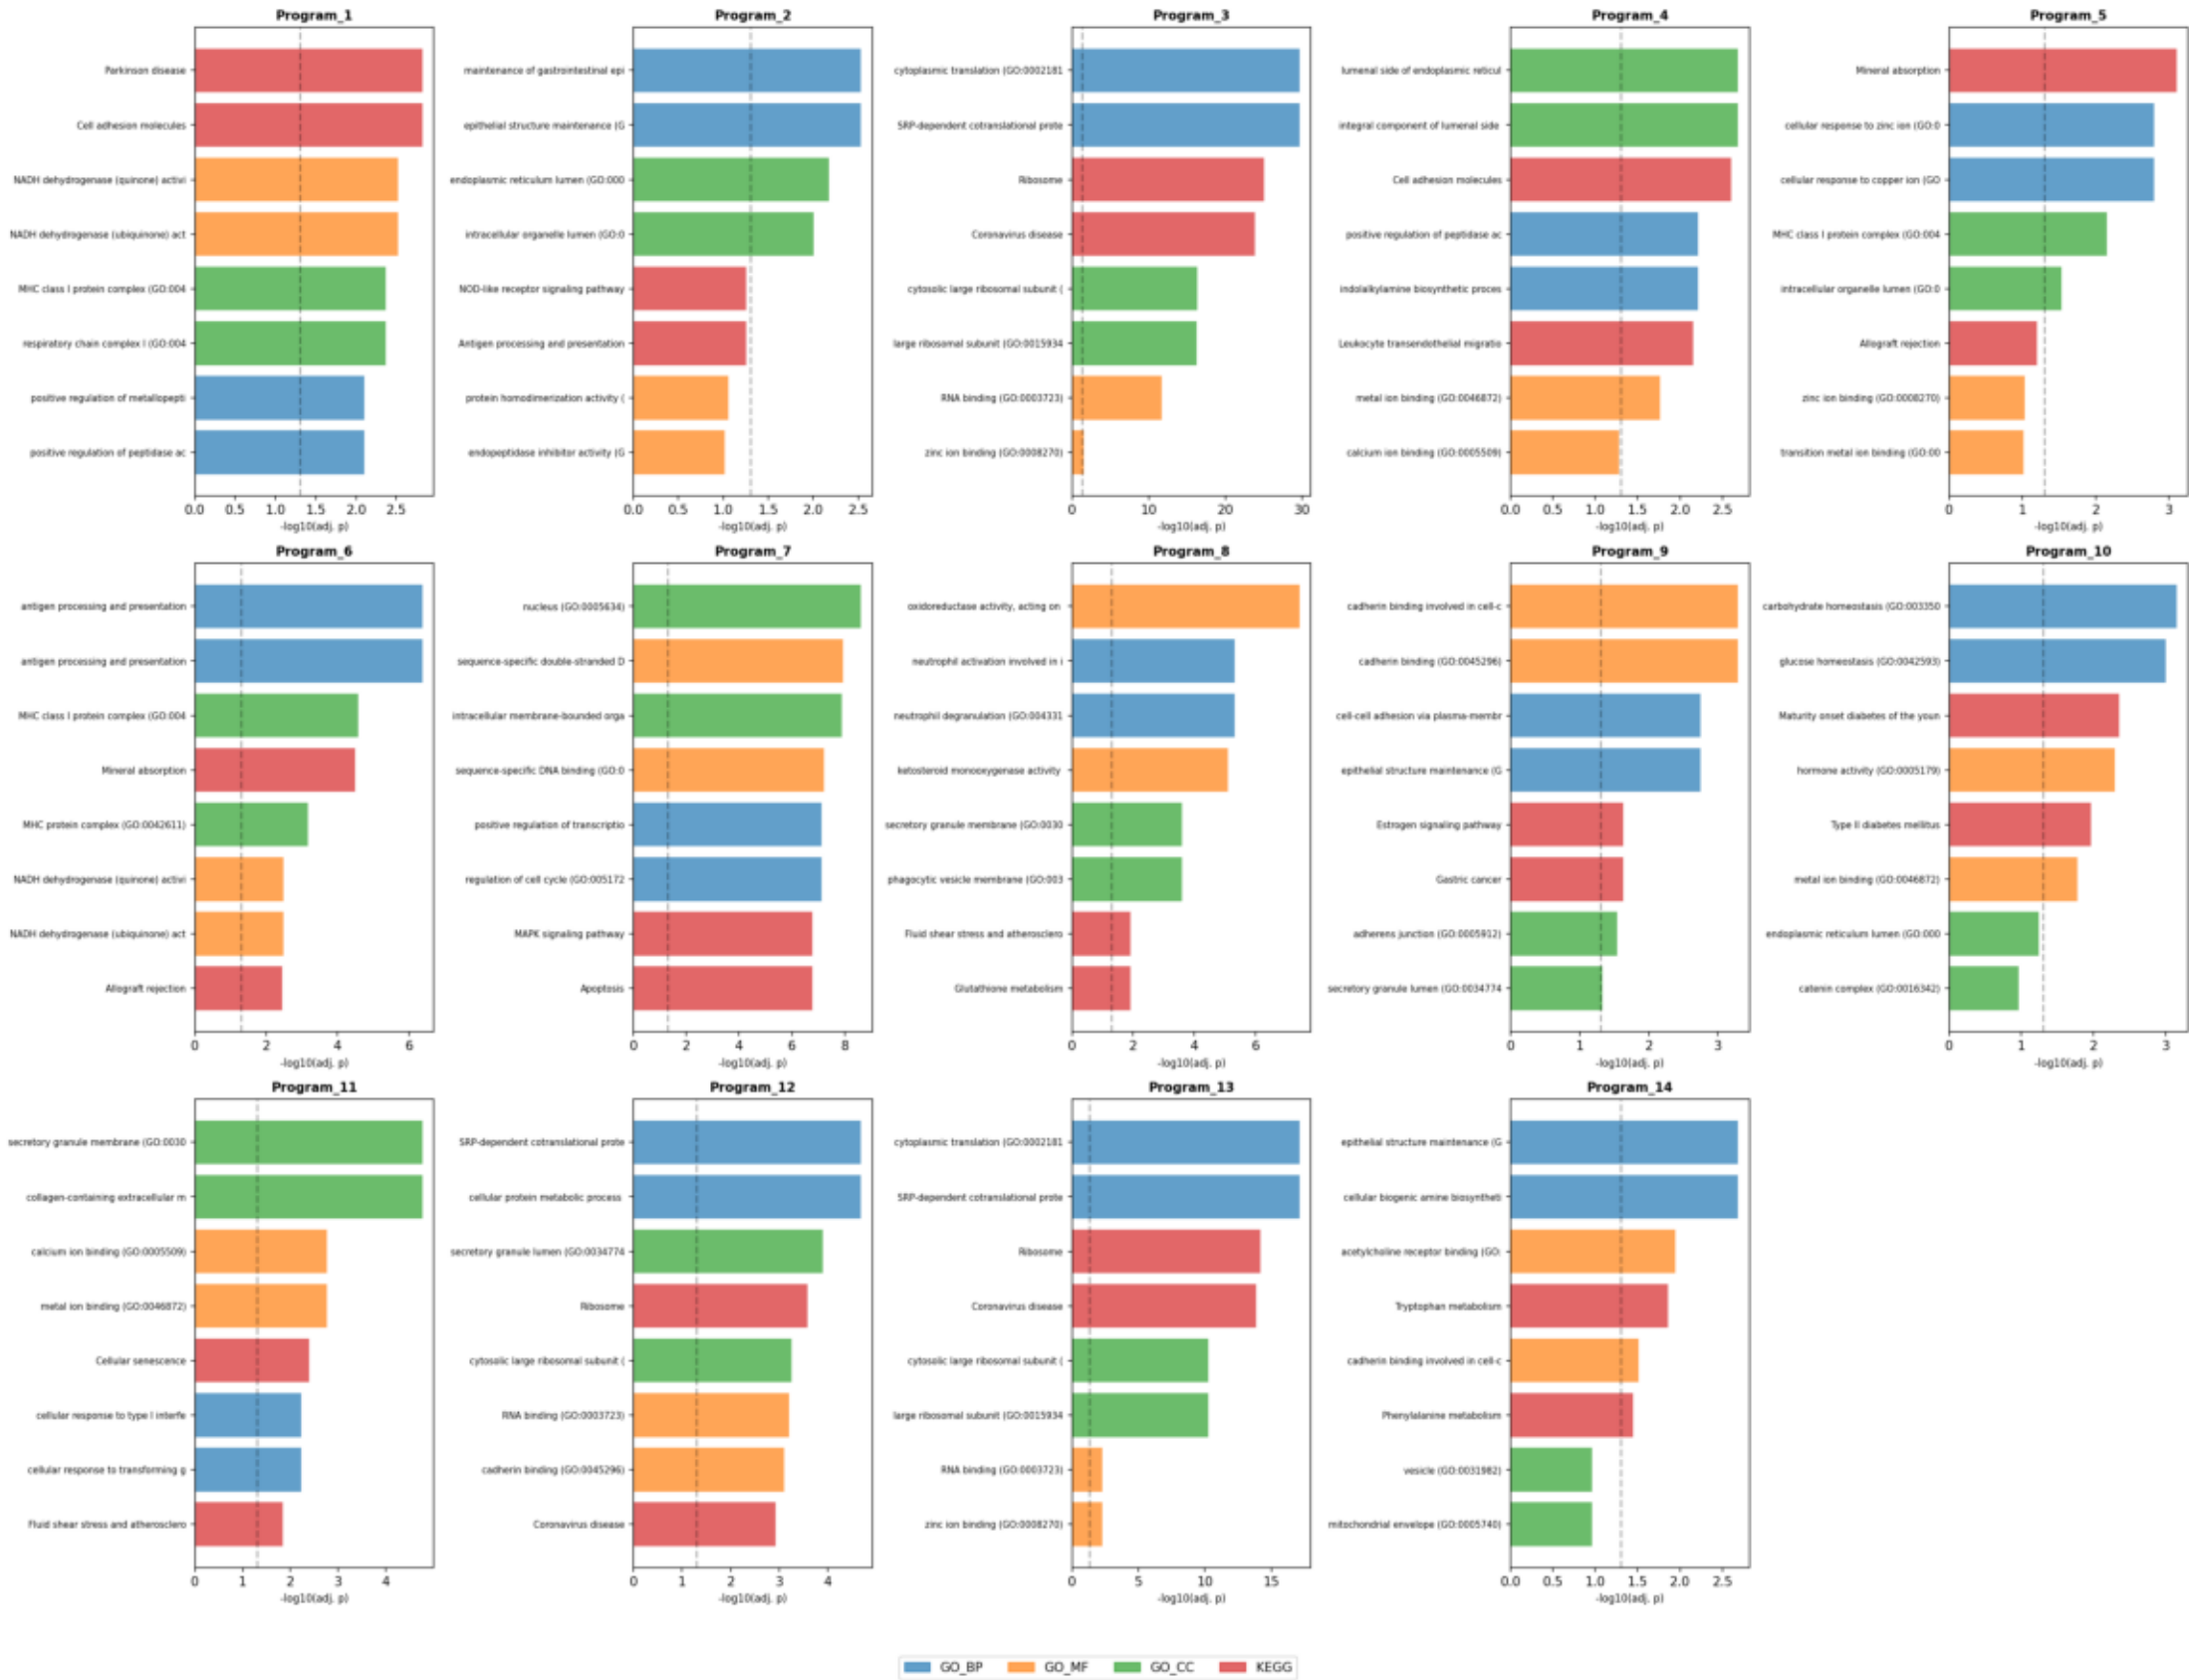

k = 15

Enrichment Analysis: All Programs (k=15)

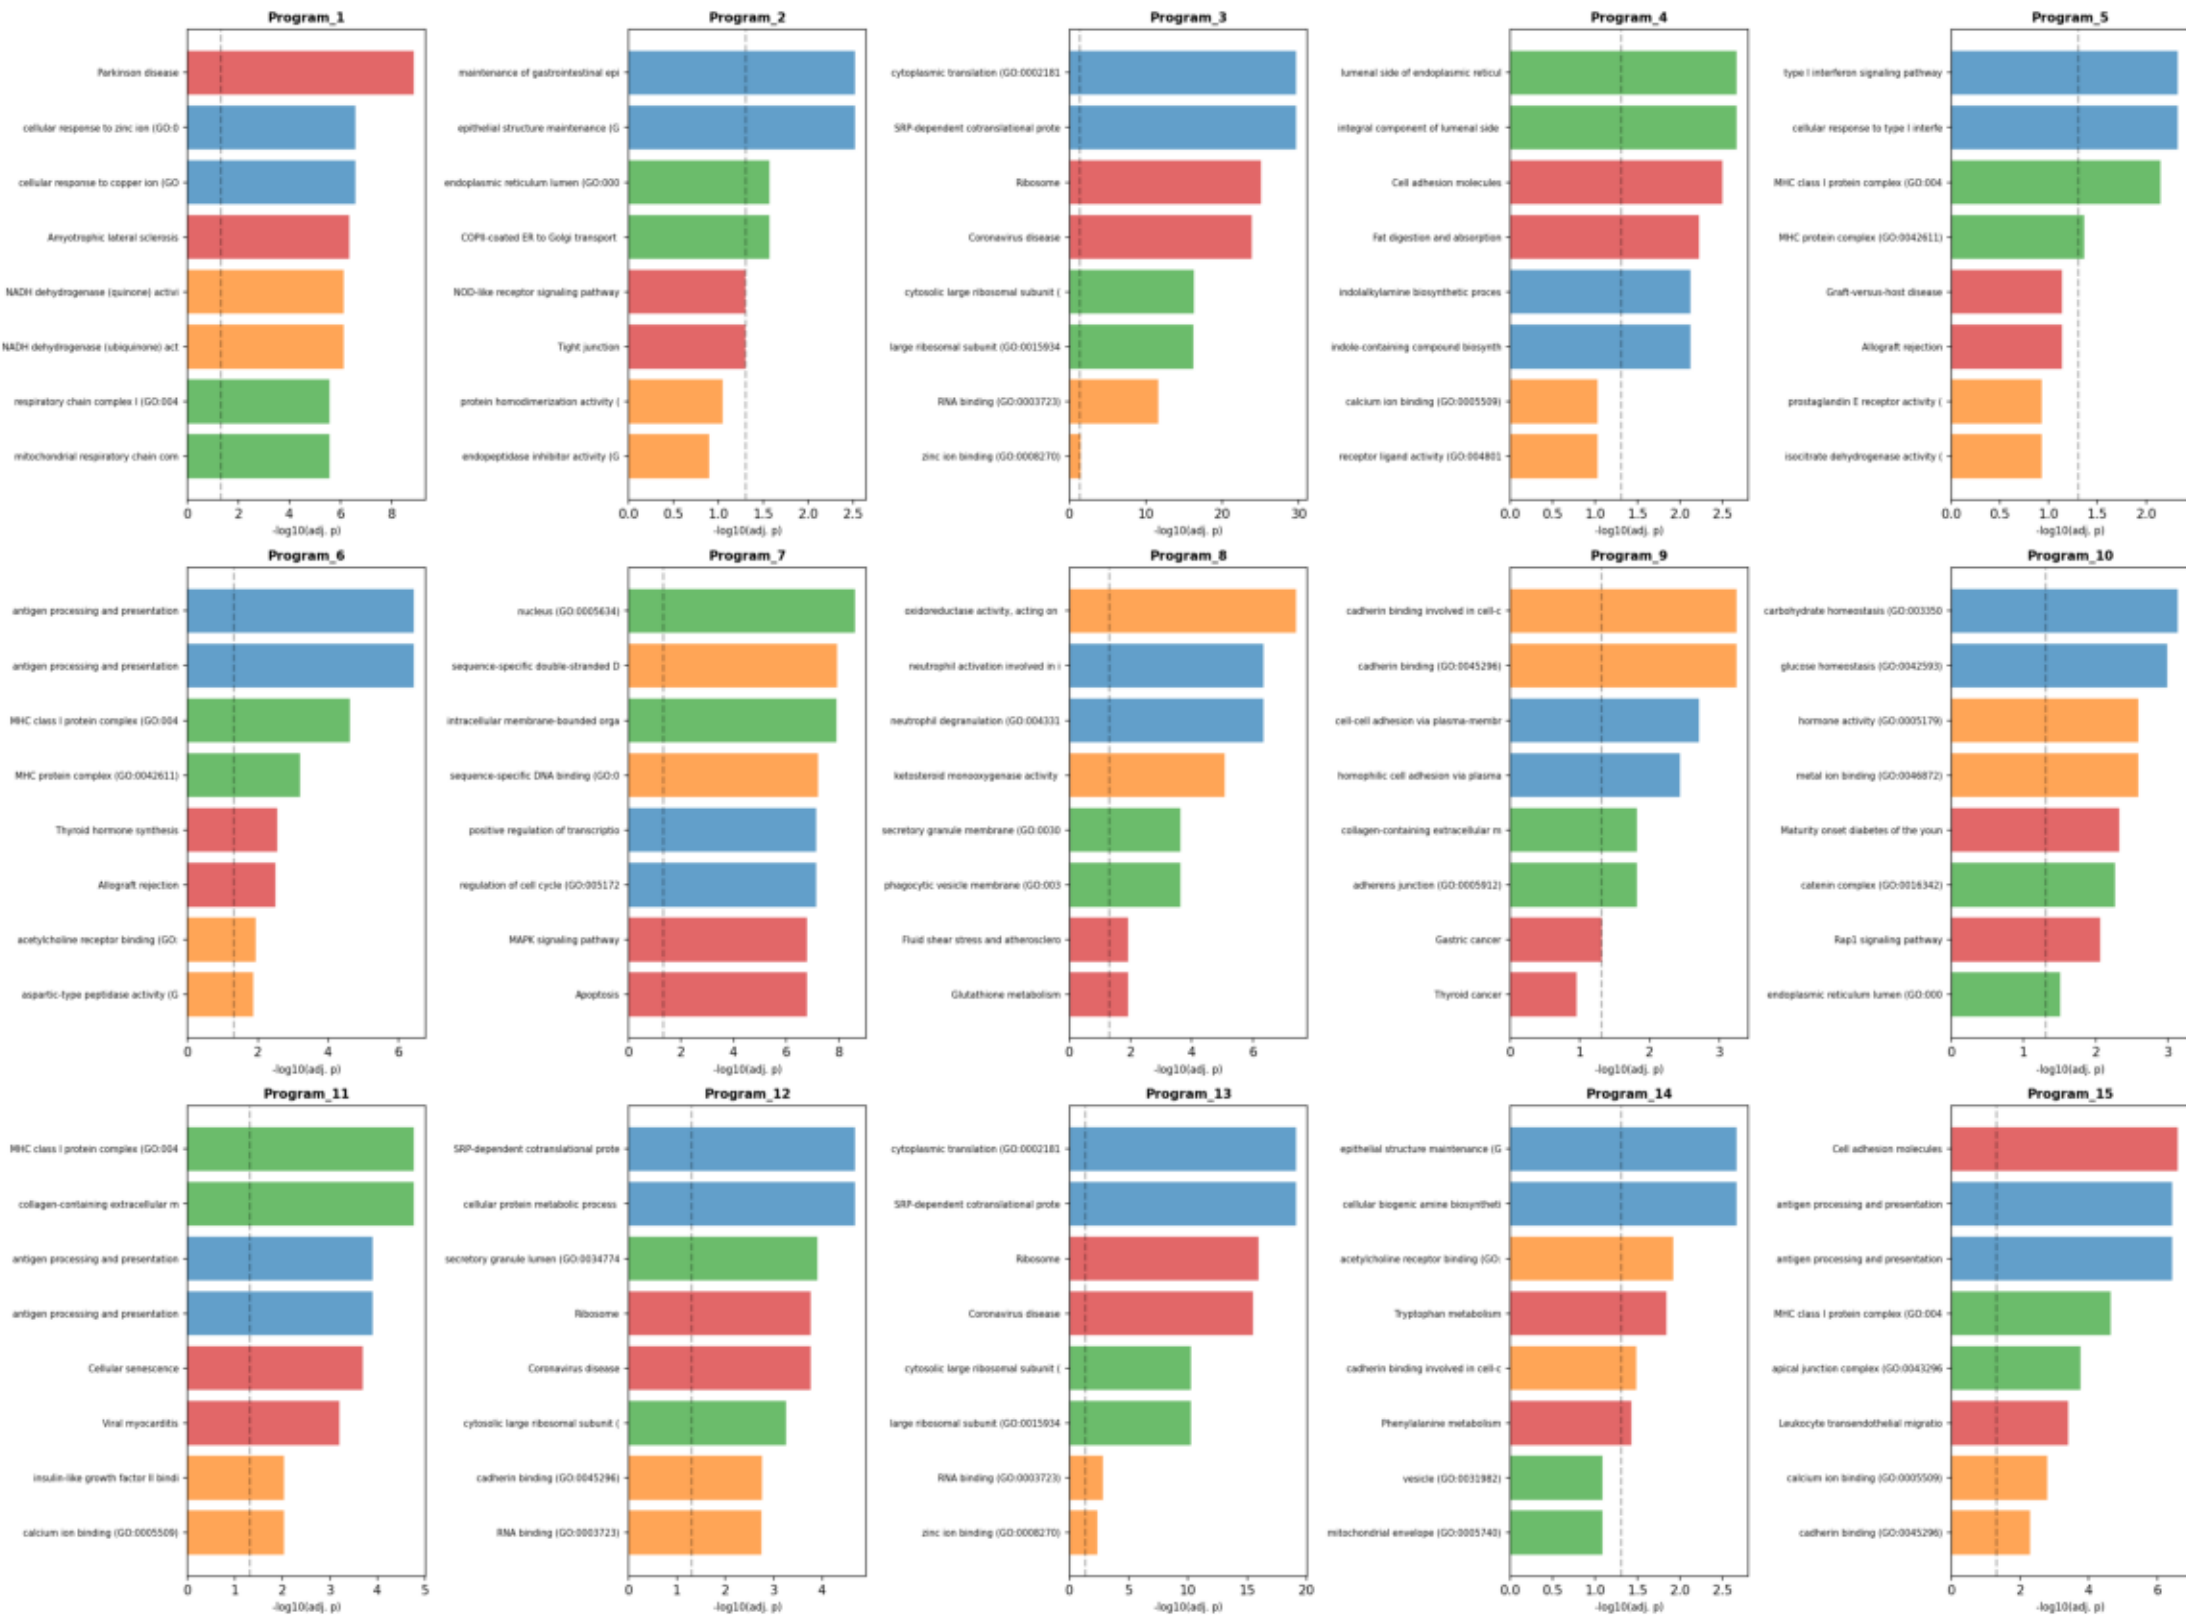

GO\_BP GO\_MF GO\_CC KEGG

k = 16

Enrichment Analysis: All Programs (k=16)

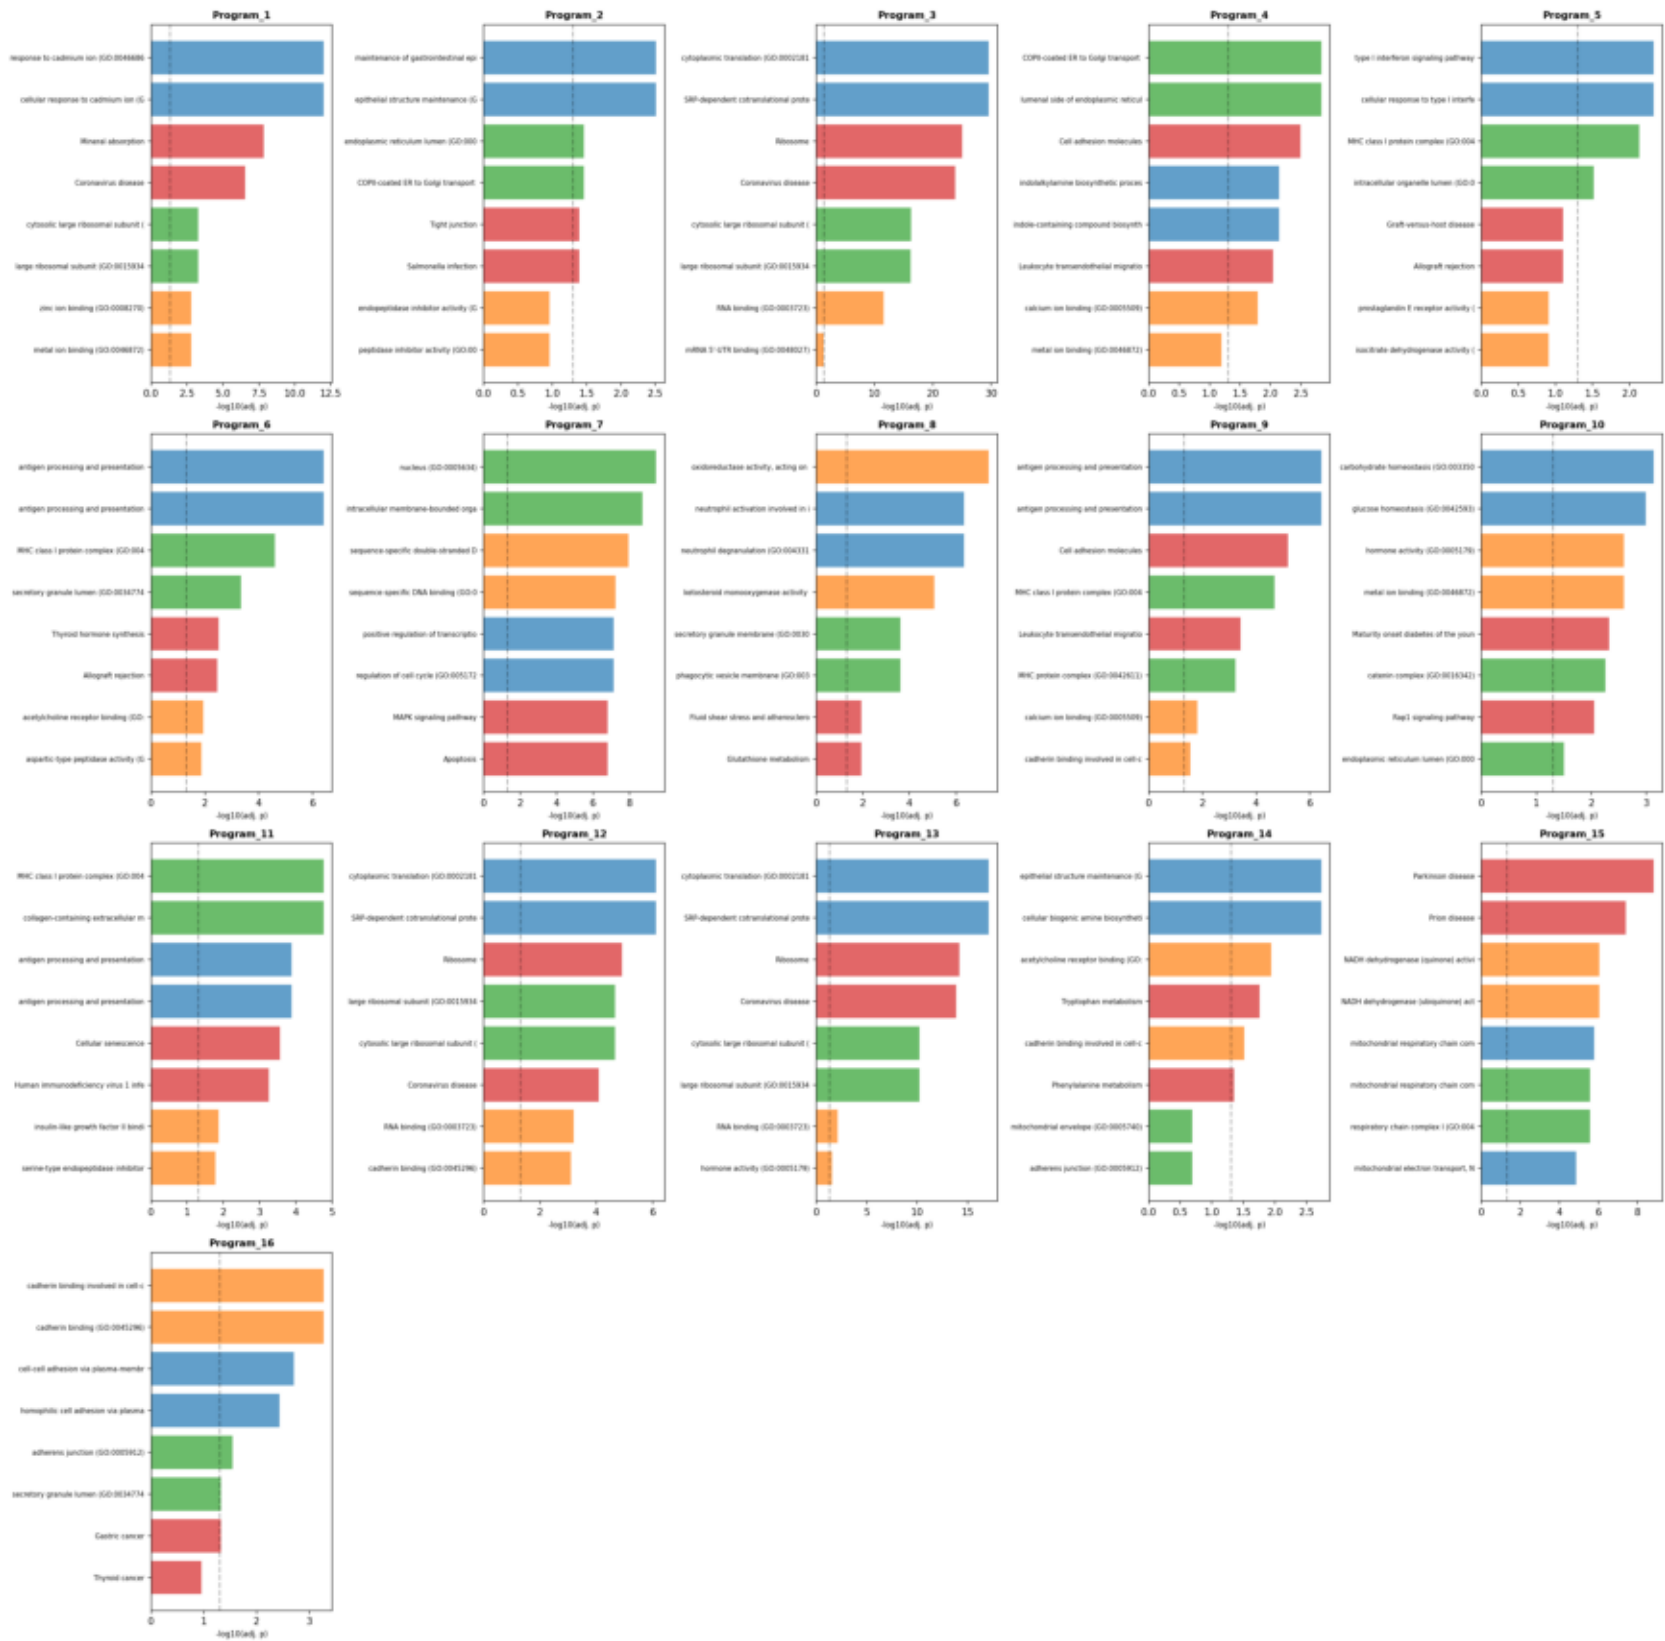



k = 17

Enrichment Analysis: All Programs (k=17)

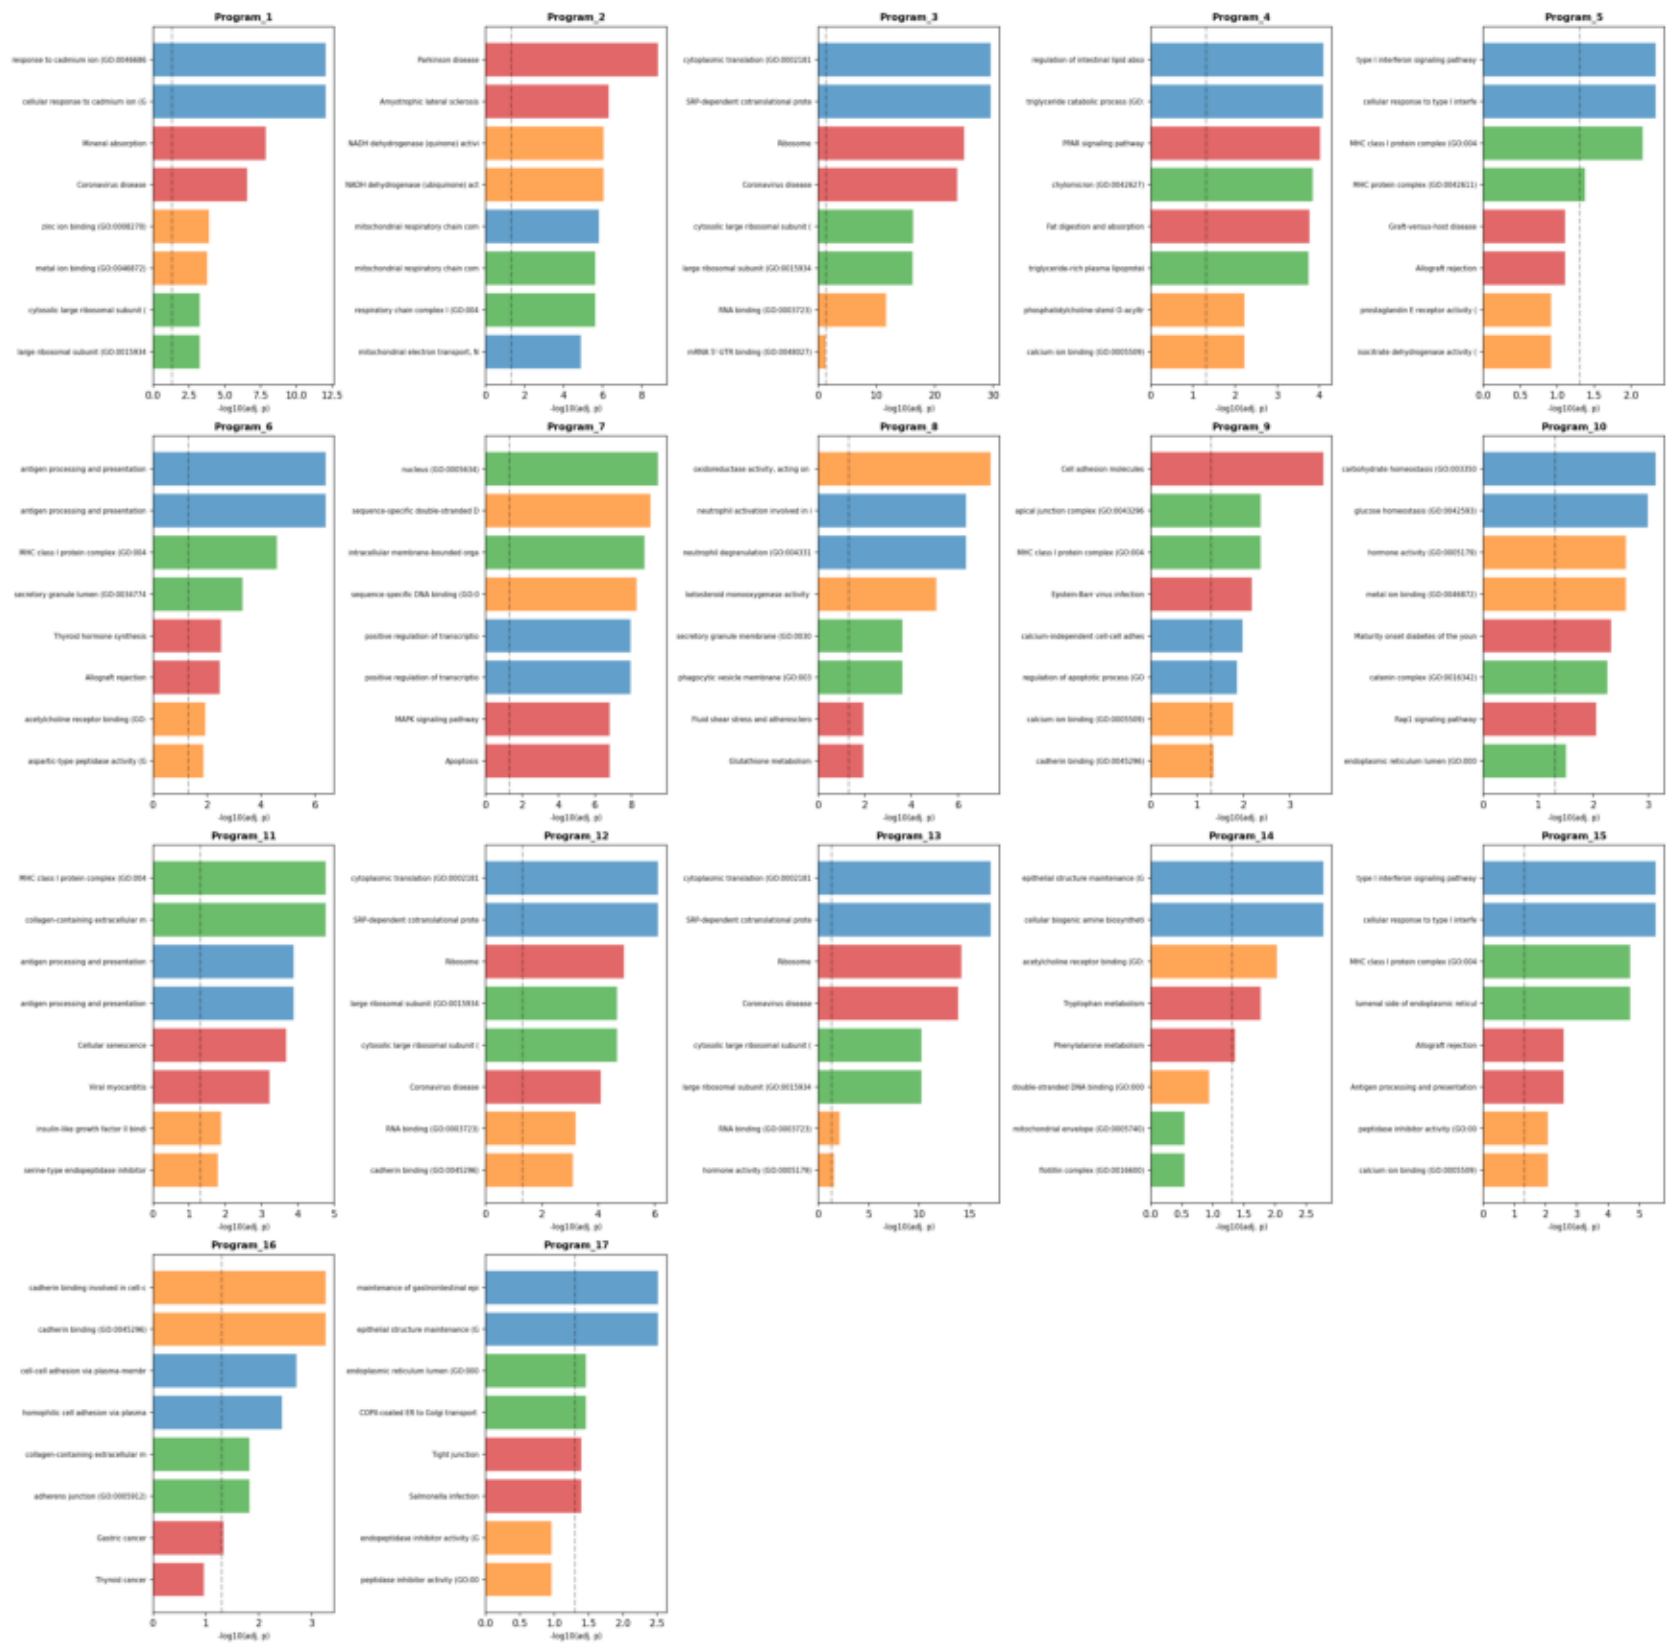

# k = 18

## Enrichment Analysis: All Programs (k=18)

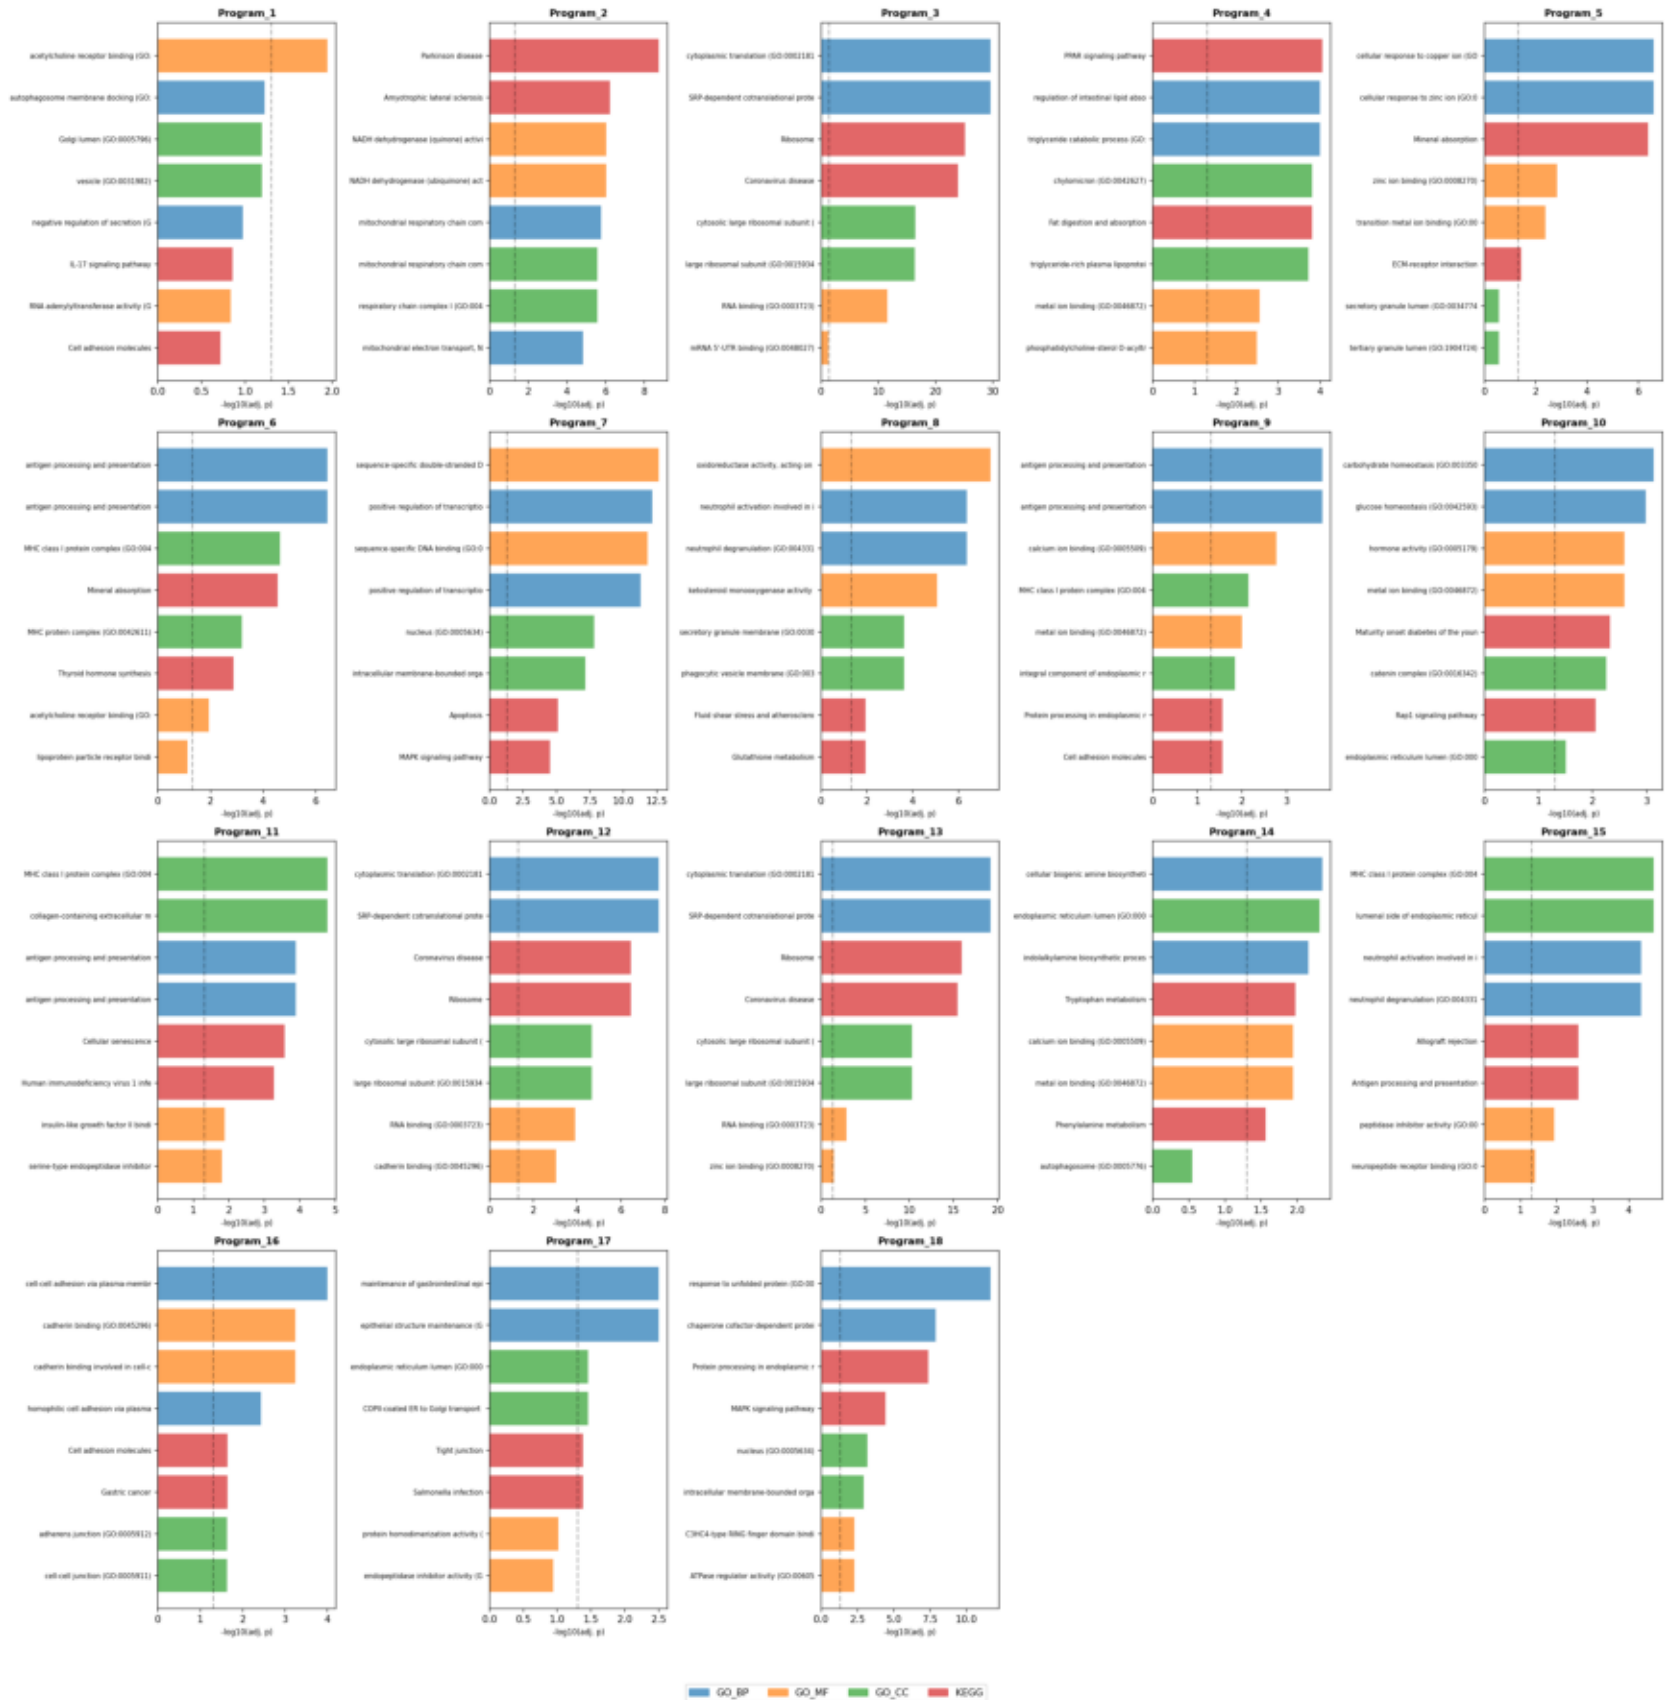

k = 19

Enrichment Analysis: All Programs (k=19)

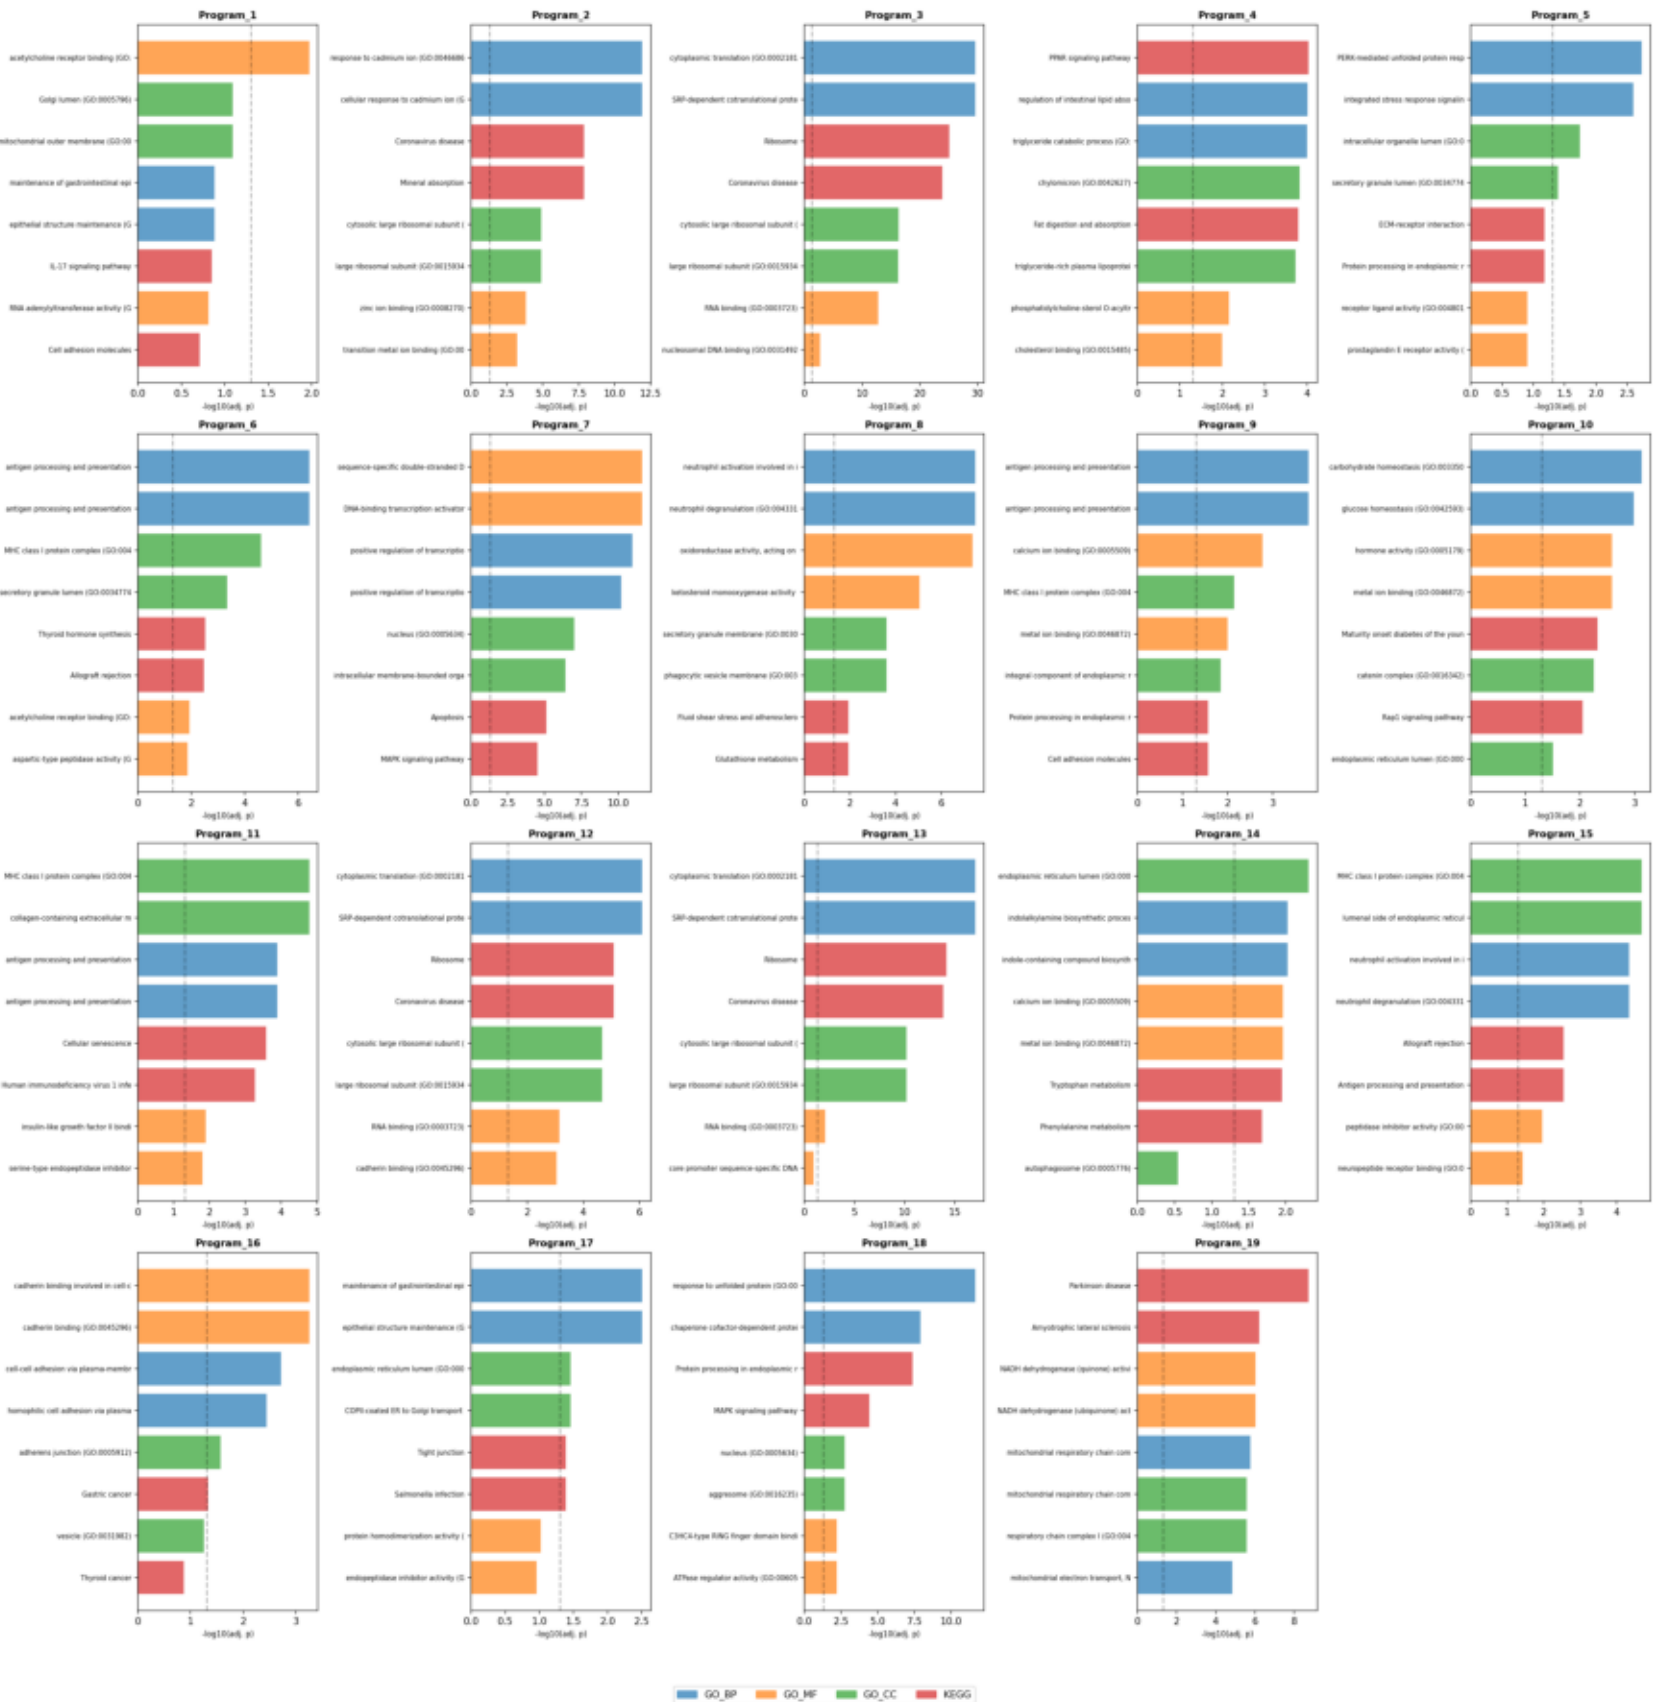

k = 20

Enrichment Analysis: All Programs (k=20)

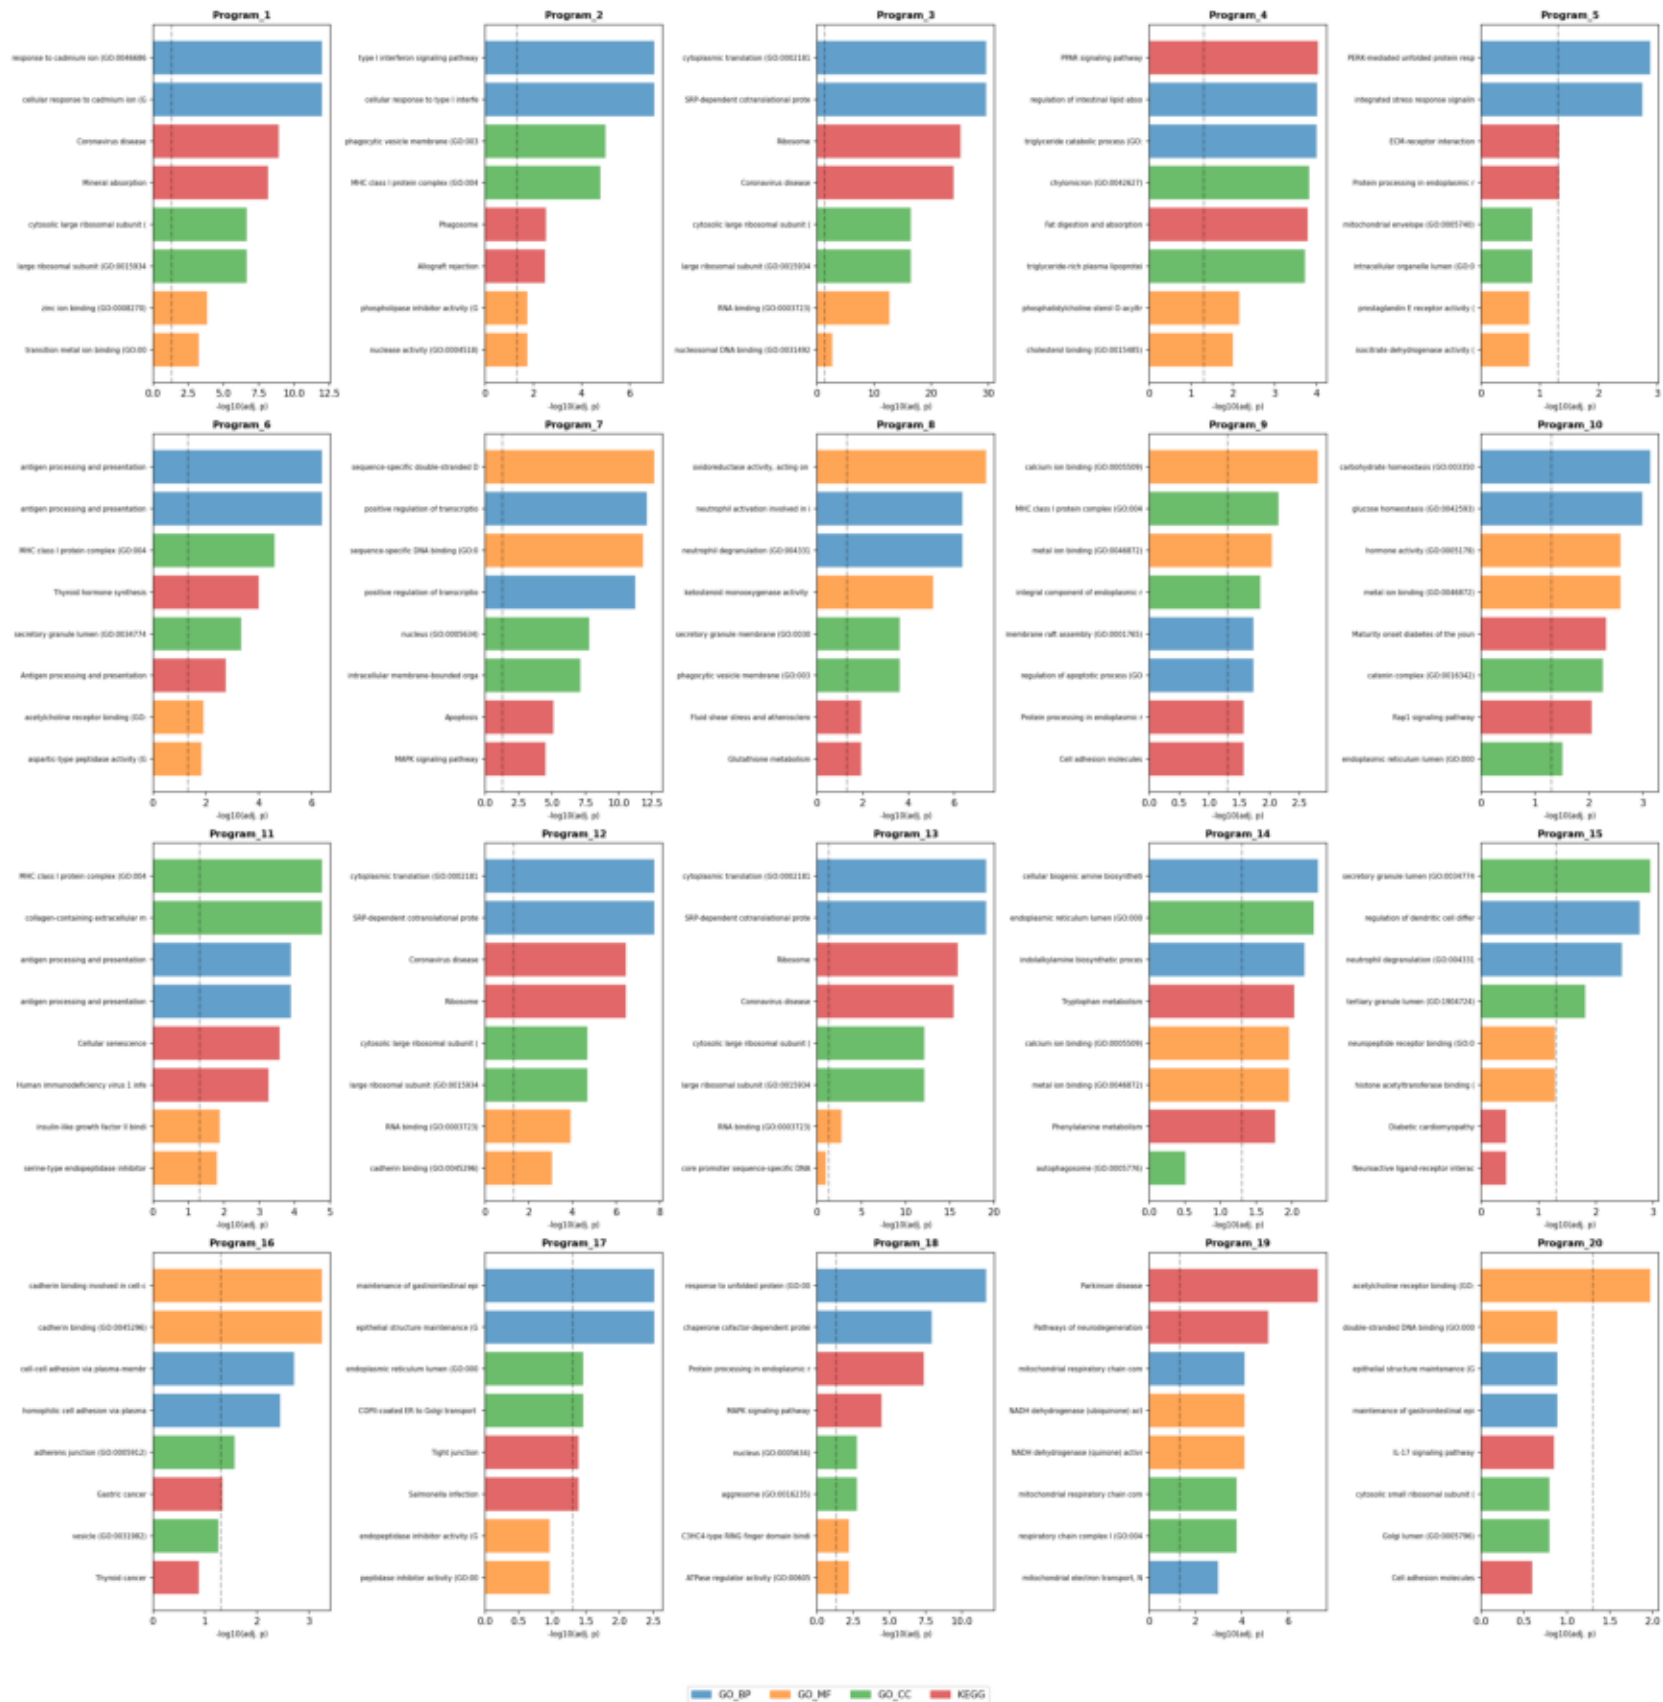

# k = 21

## Enrichment Analysis: All Programs (k=21)

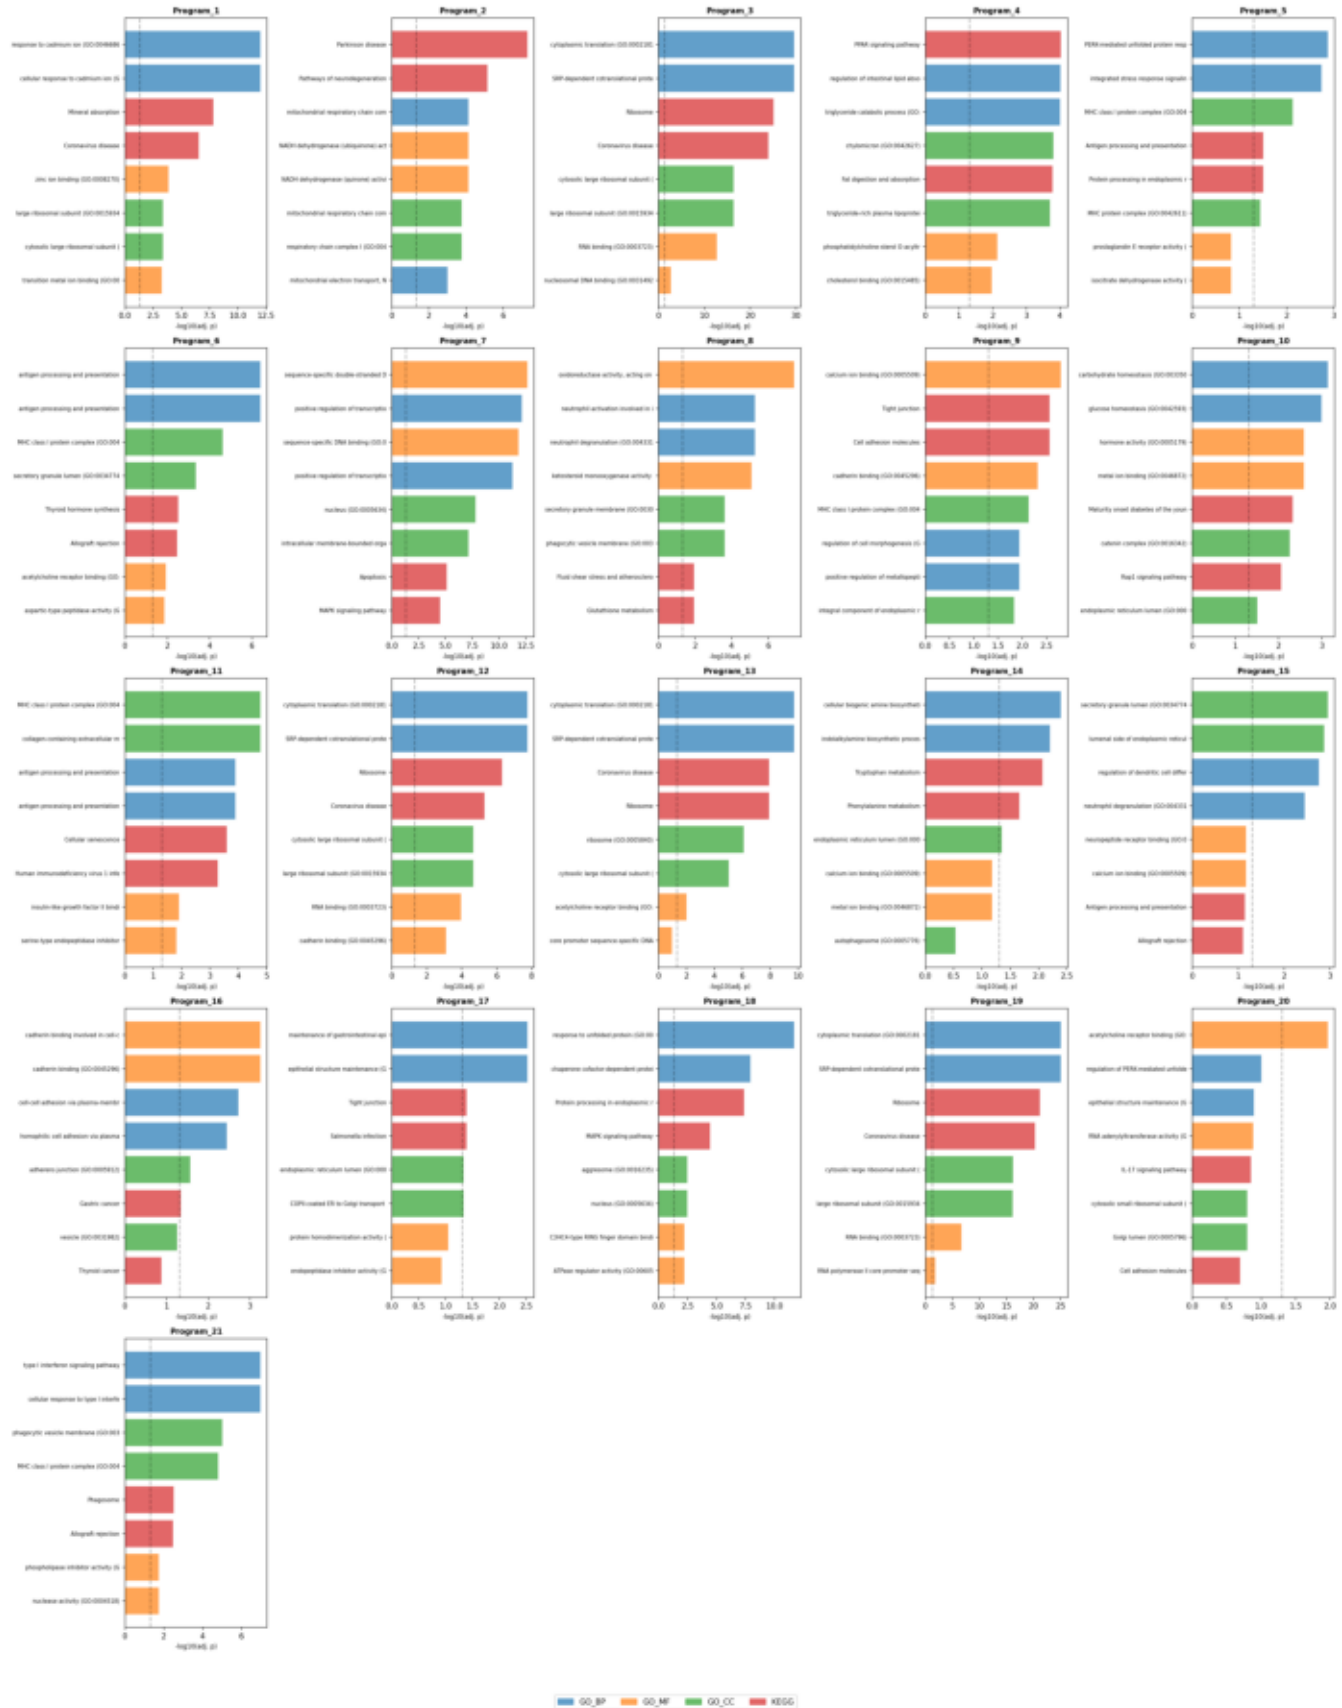

# k = 22

## Enrichment Analysis: All Programs (k=22)

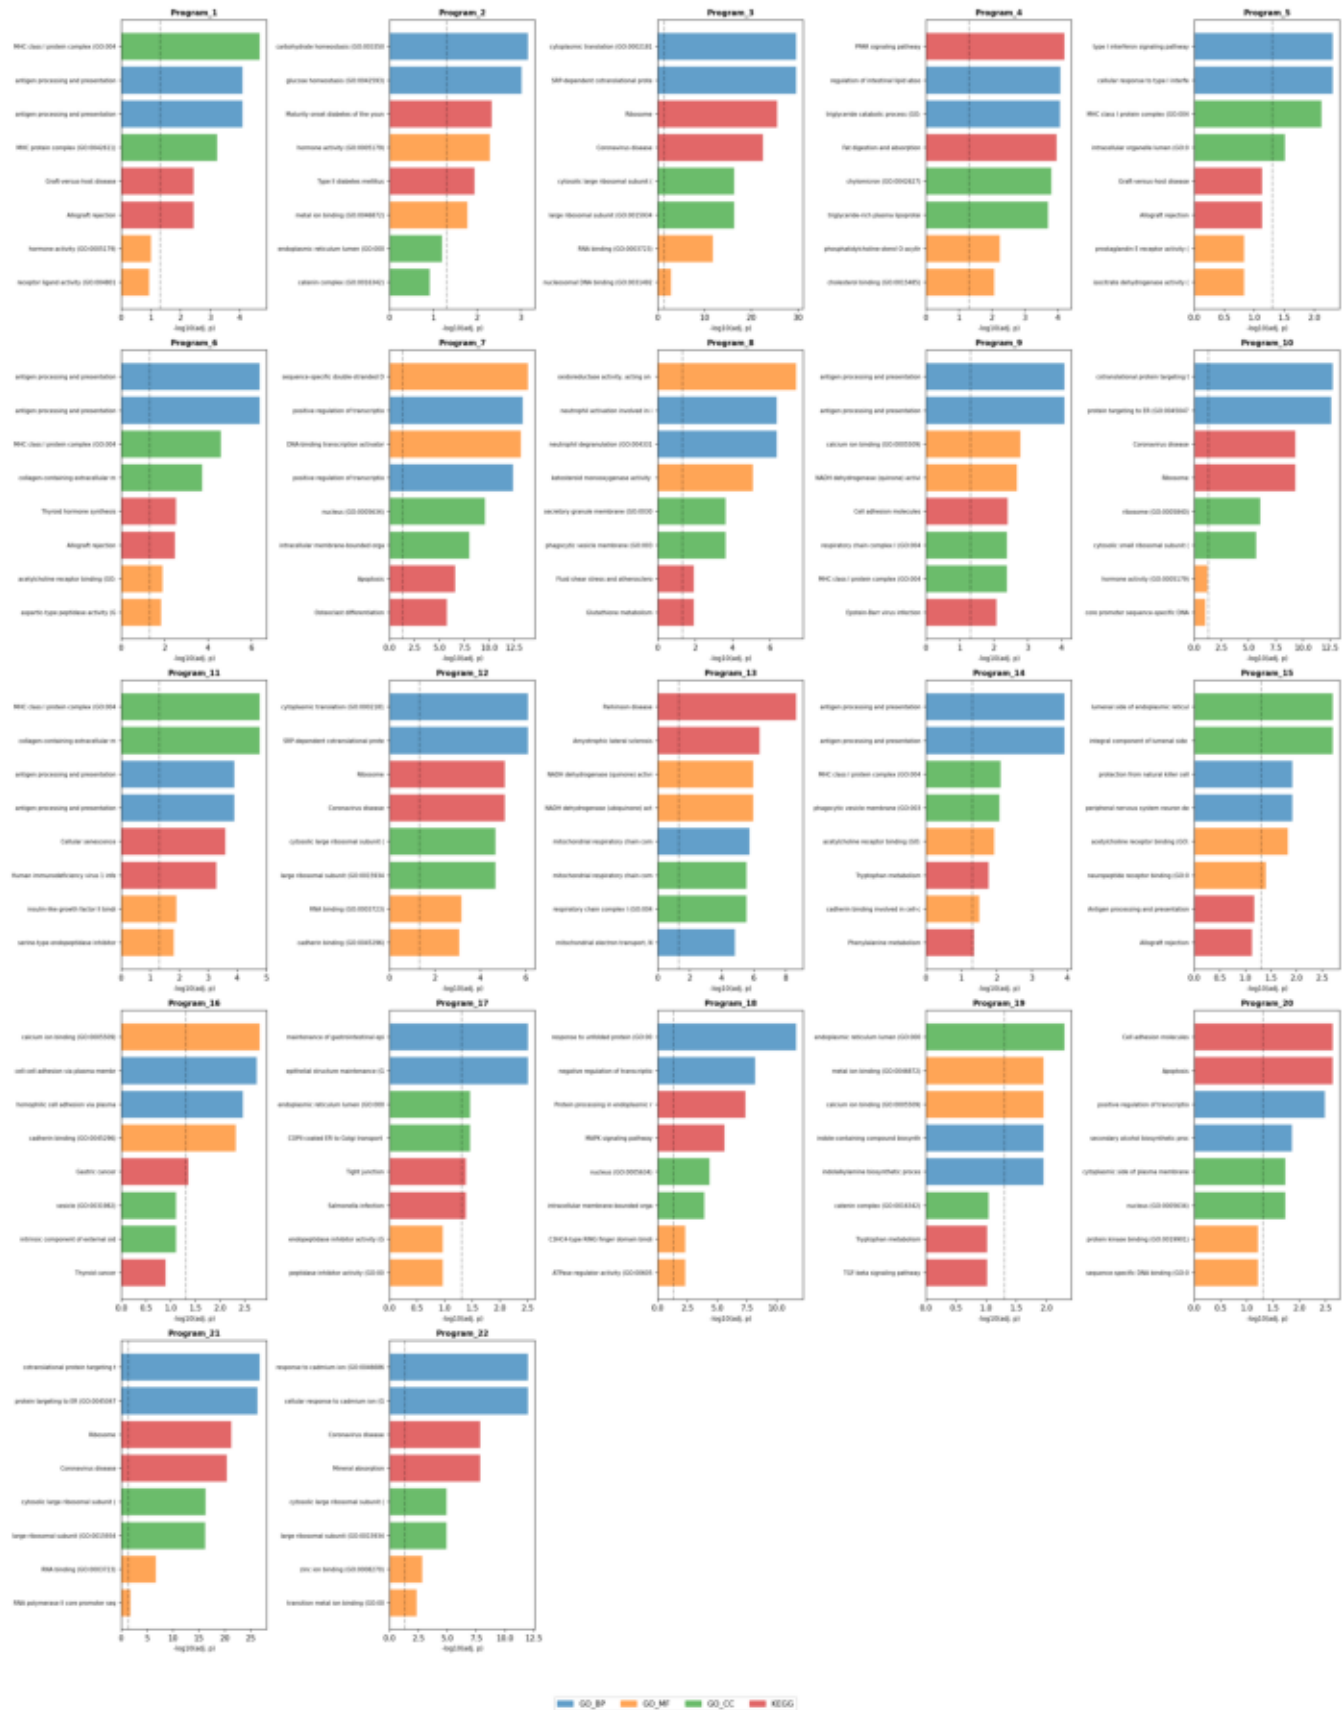

# k = 23

## Enrichment Analysis: All Programs (k=23)

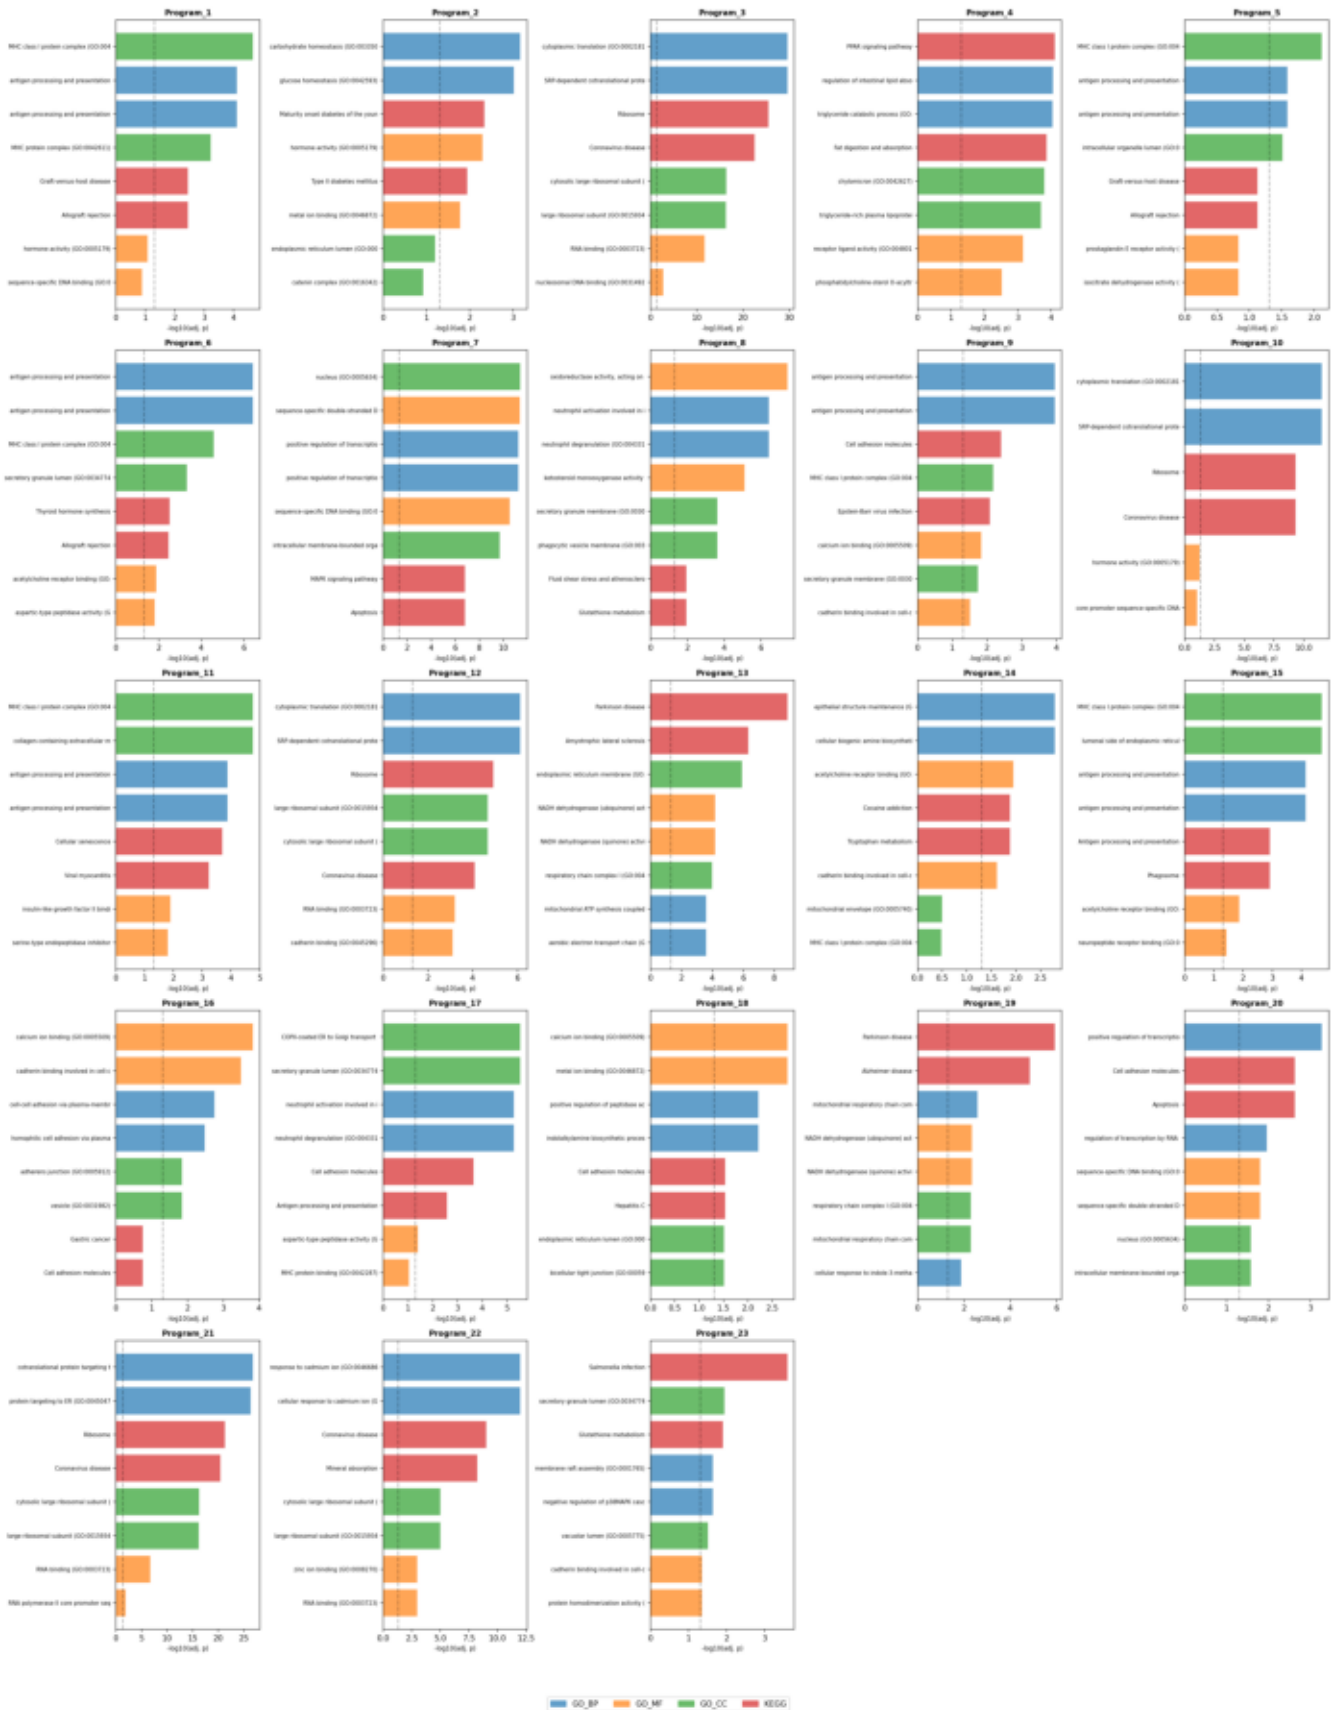

# k = 24

Enrichment Analysis: All Programs (k=24)

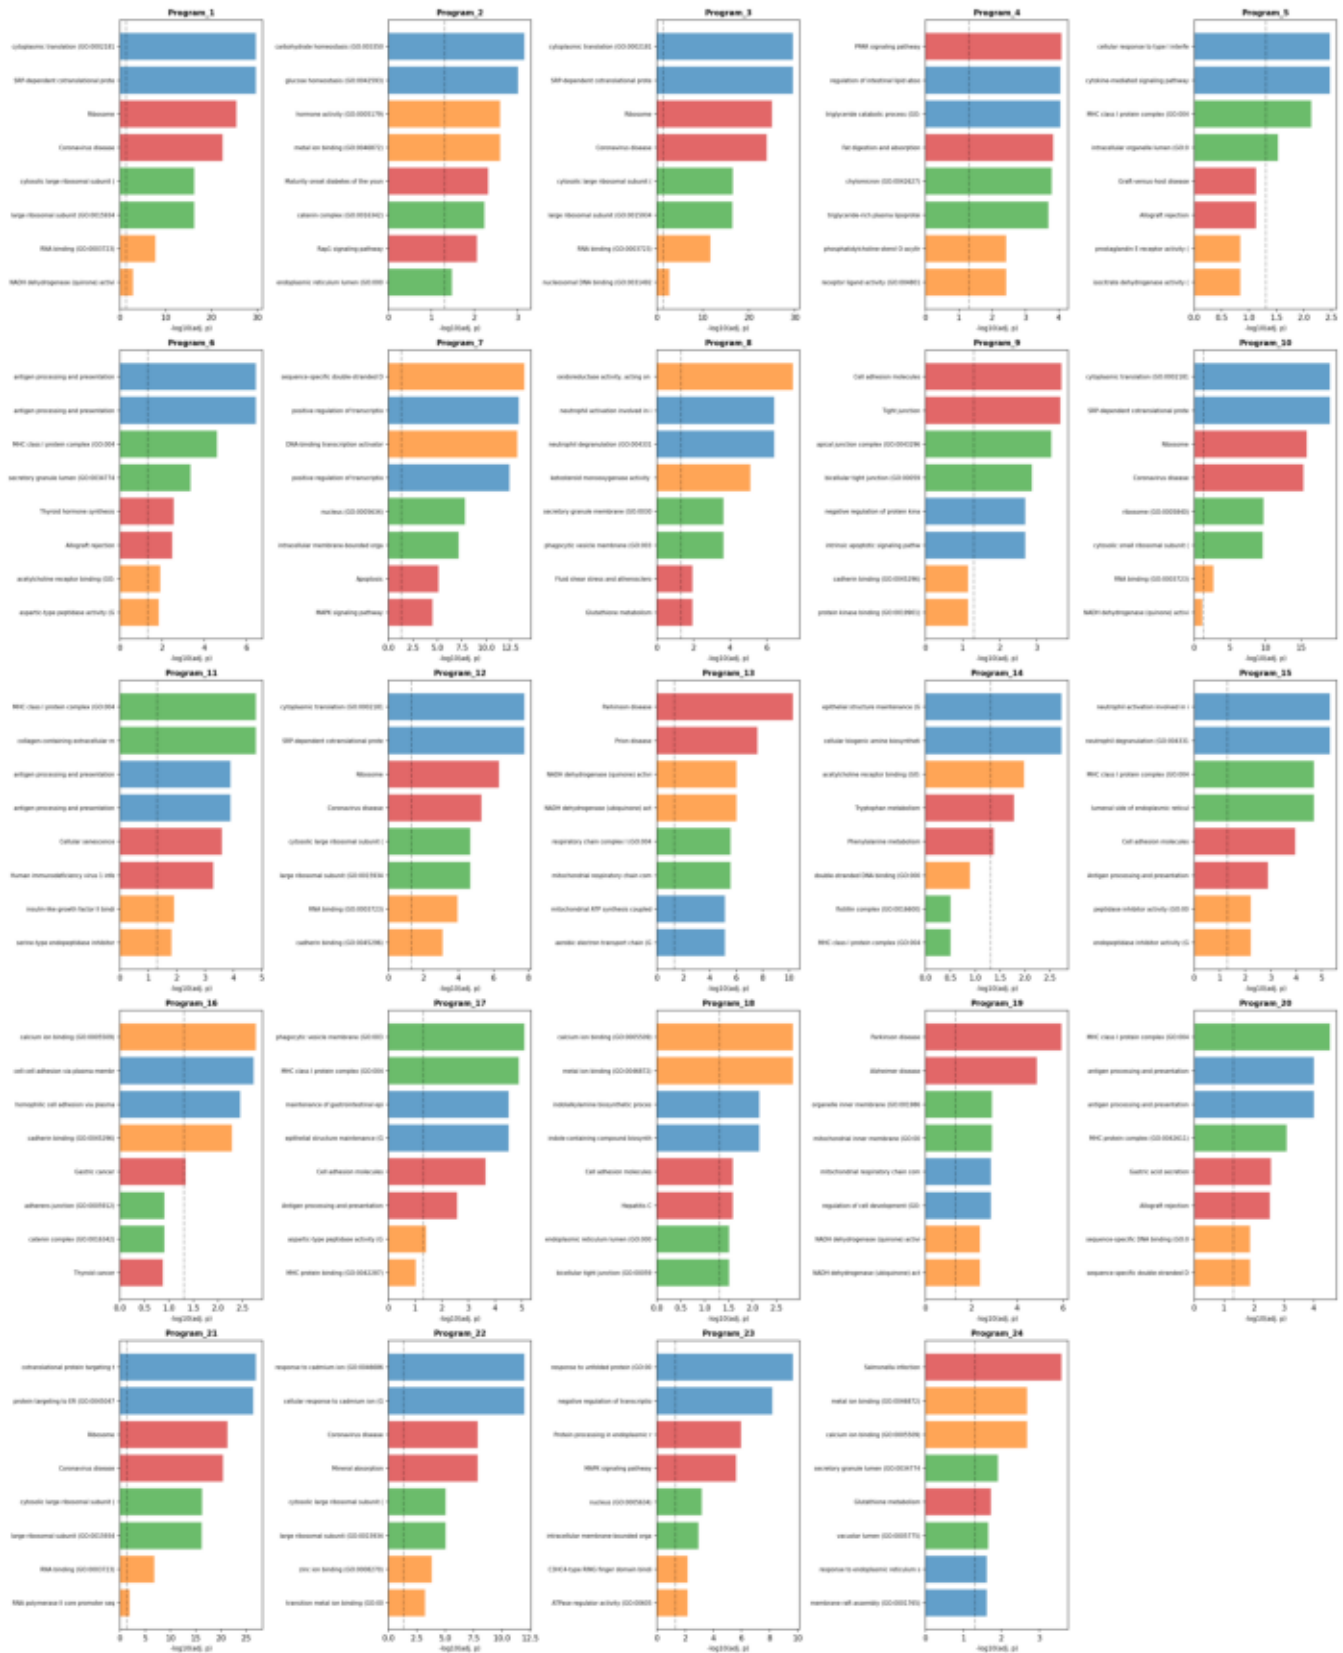

GO\_BP GO\_MF GO\_CC KEGG



k = 25

Enrichment Analysis: All Programs (k=25)

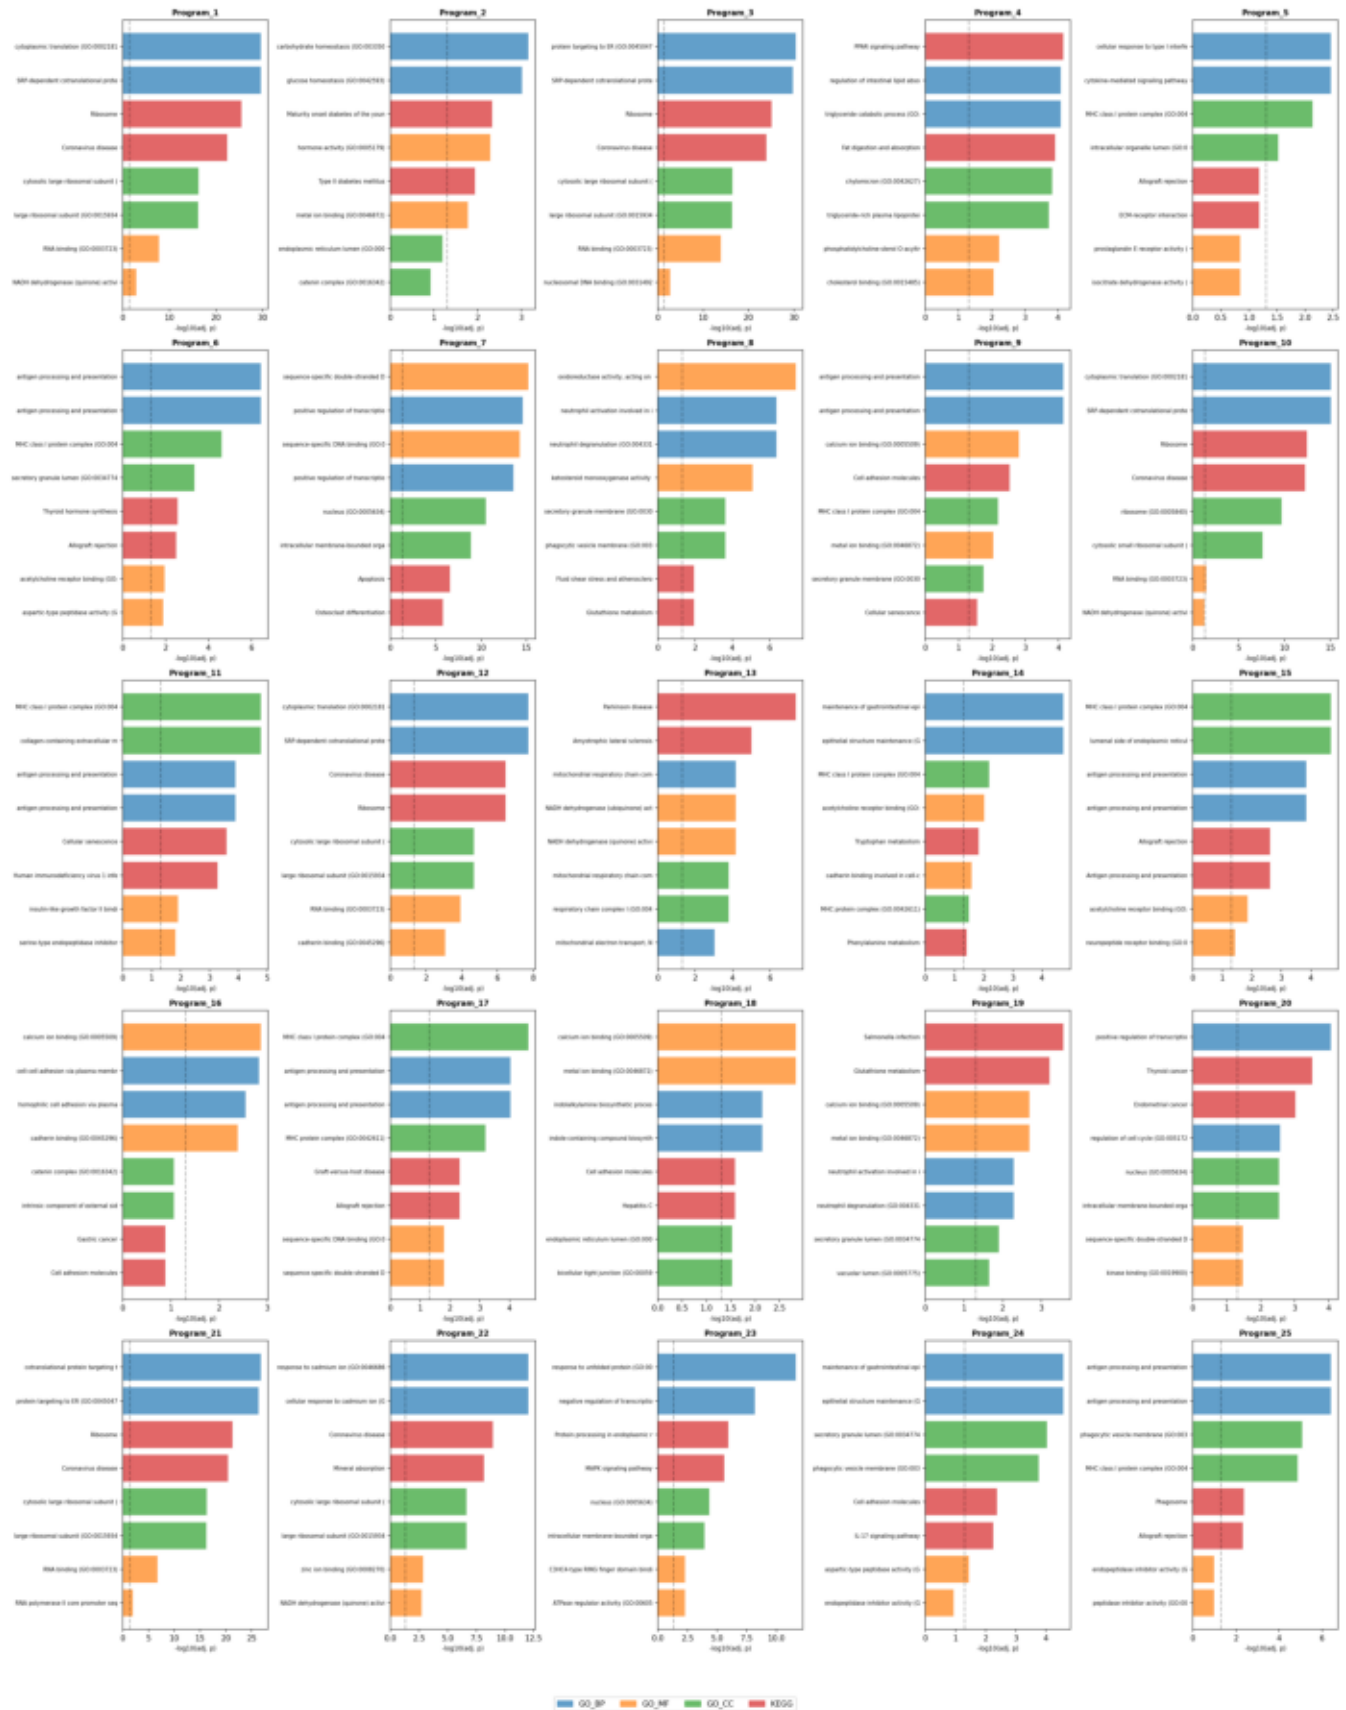

#### Enrichment Analysis: All Programs (k=26)

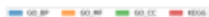

Enrichment Analysis: All Programs (k=27)

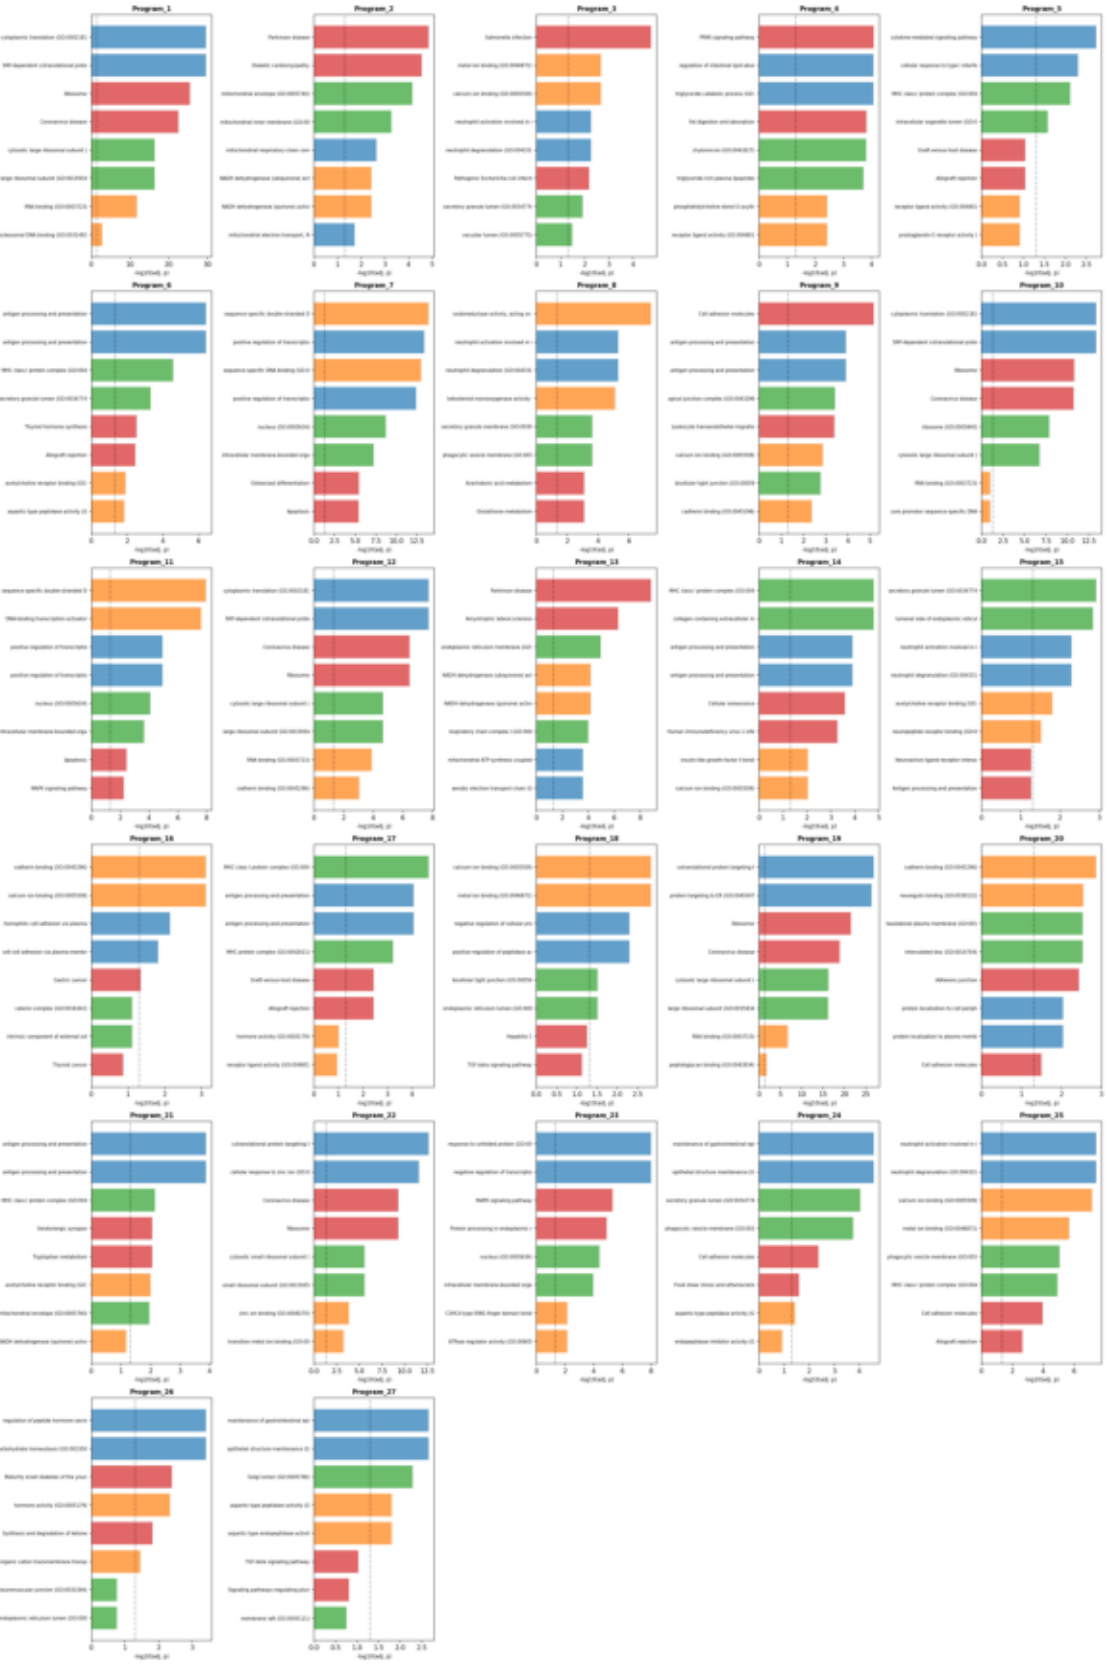

#### Enrichment Analysis: All Programs (k=28)

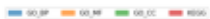

Enrichment Analysis: All Programs (k=29)

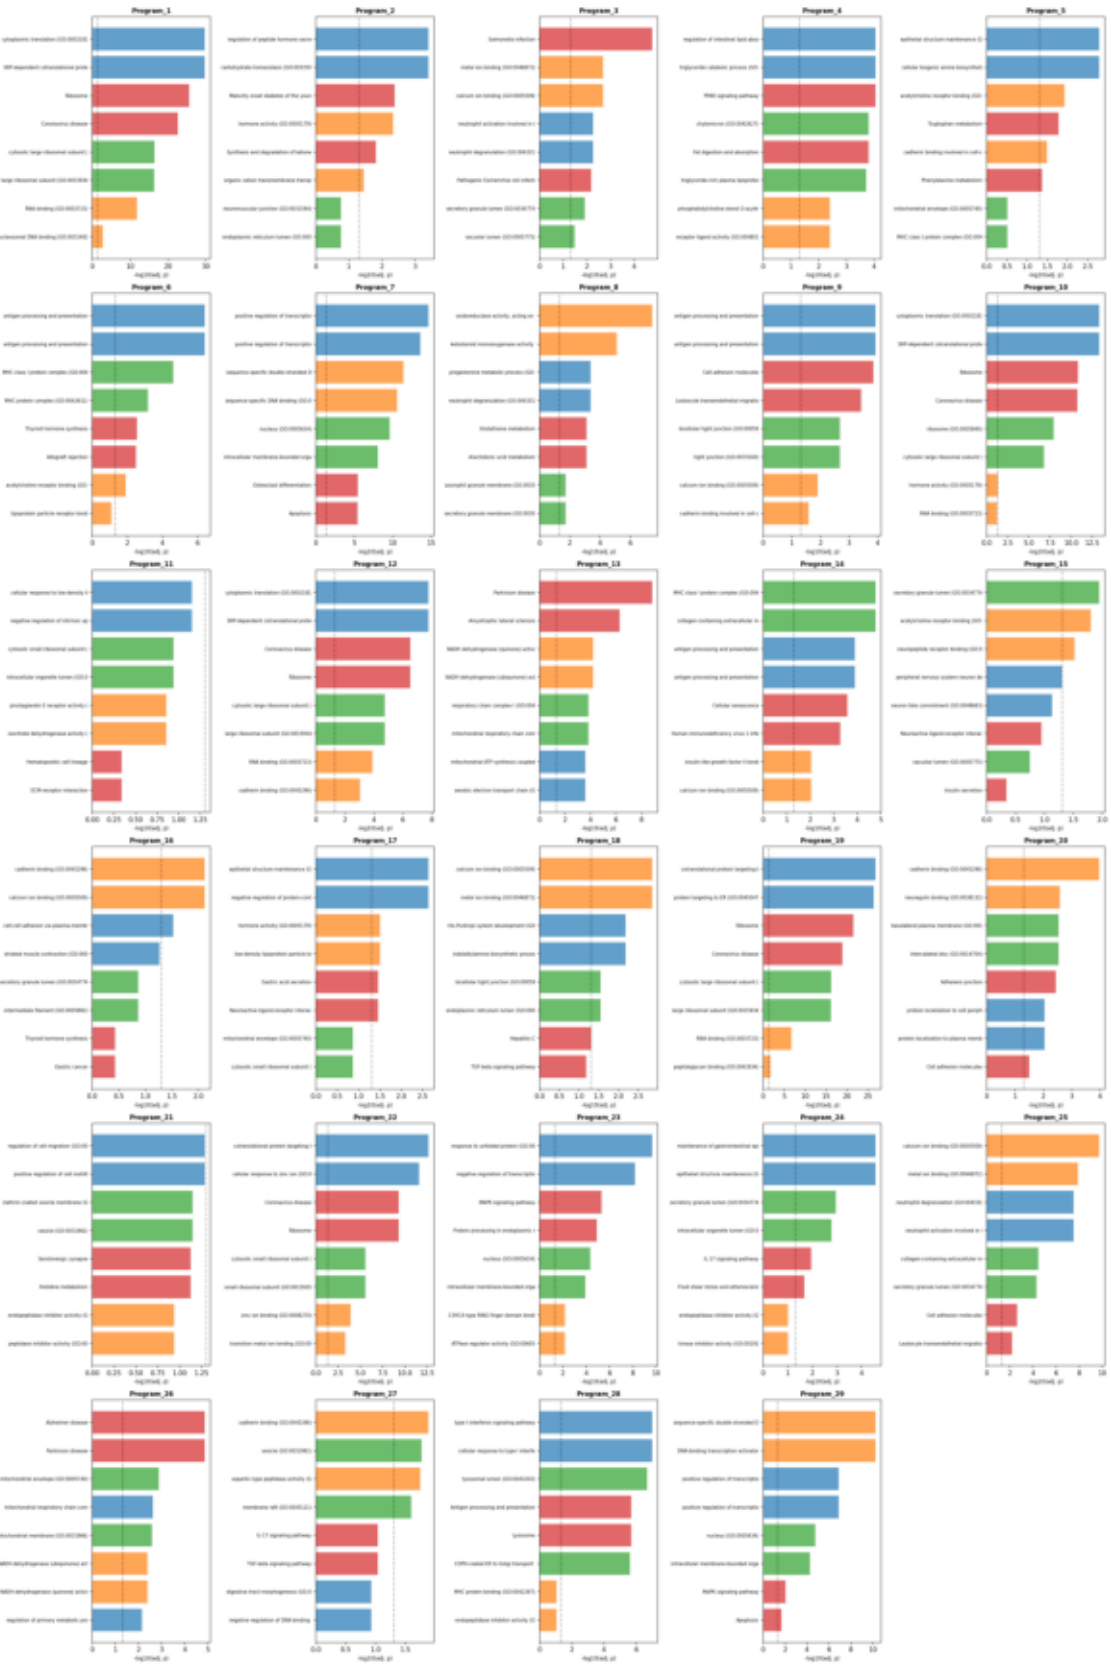

**Enrichment Analysis: All Programs (k=30)**

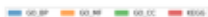

k = 31

Enrichment Analysis: All Programs (k=31)

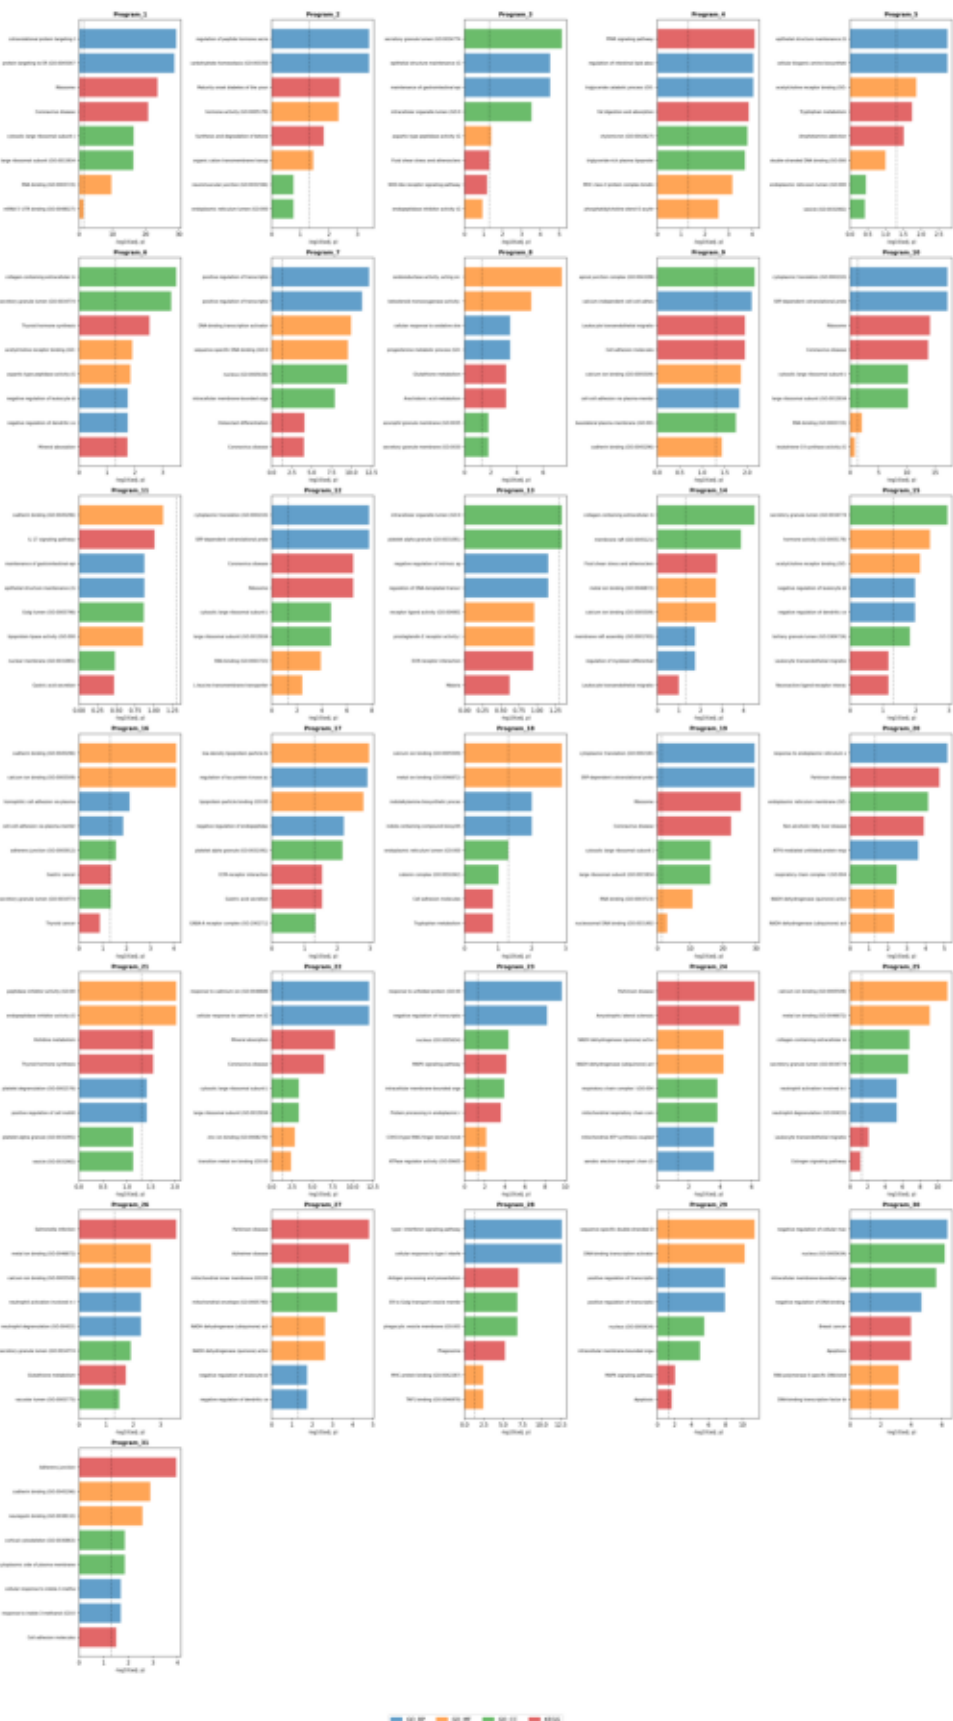

k = 32

Enrichment Analysis: All Programs (k=32)

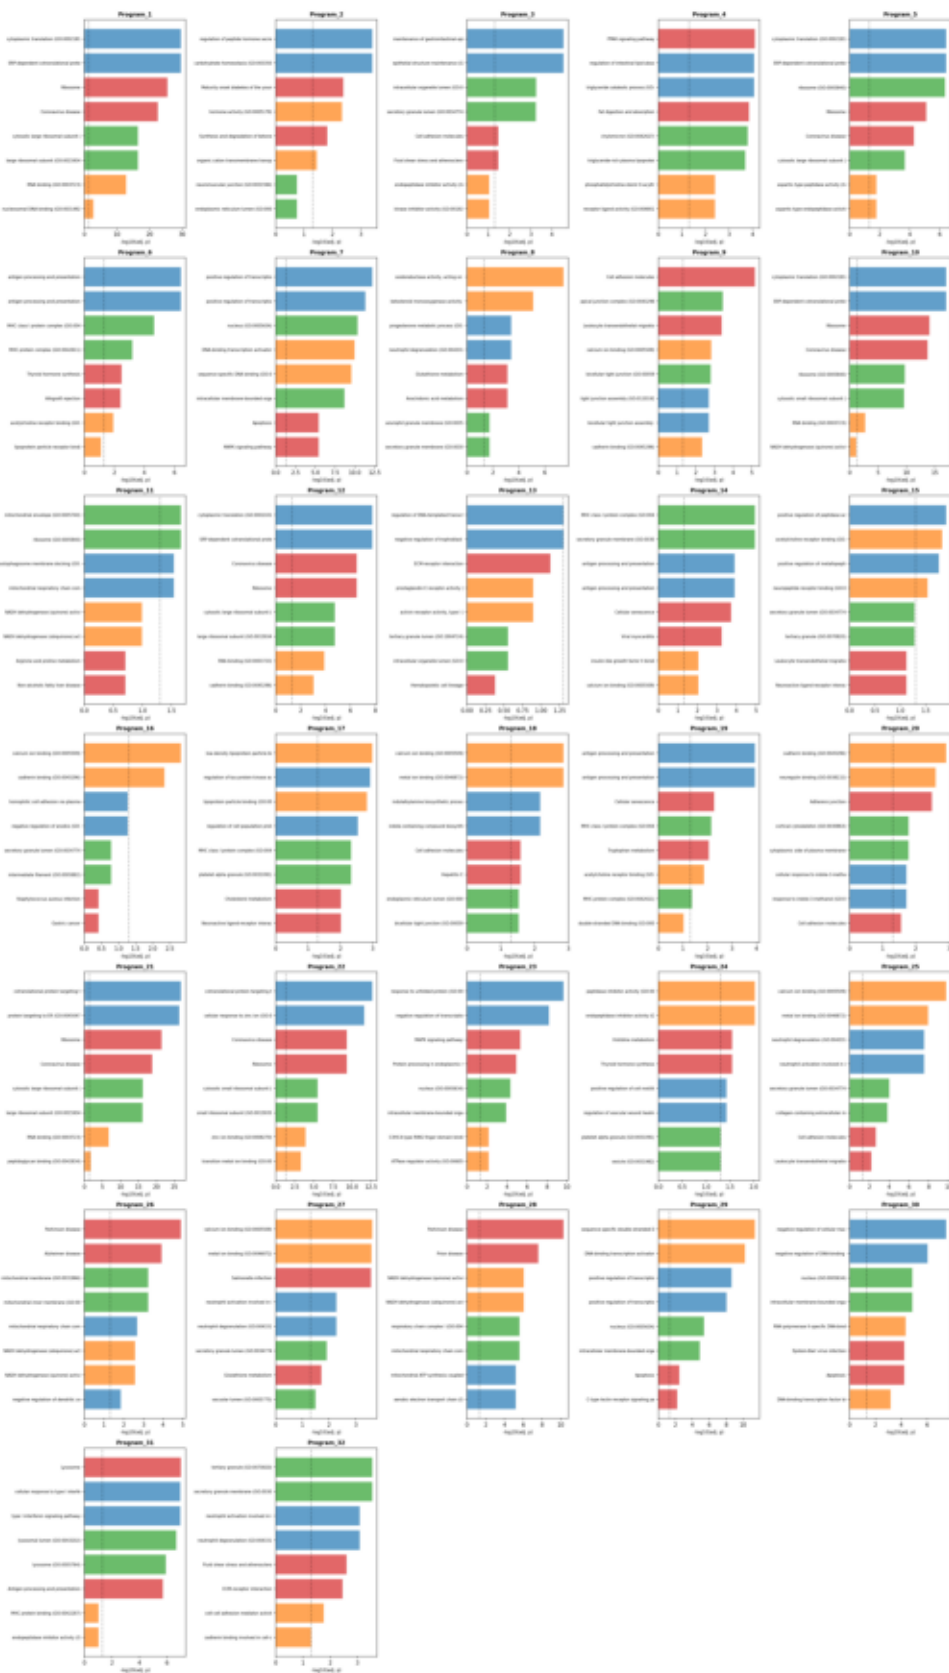



**k = 33**

**Enrichment Analysis: All Programs (k=33)**

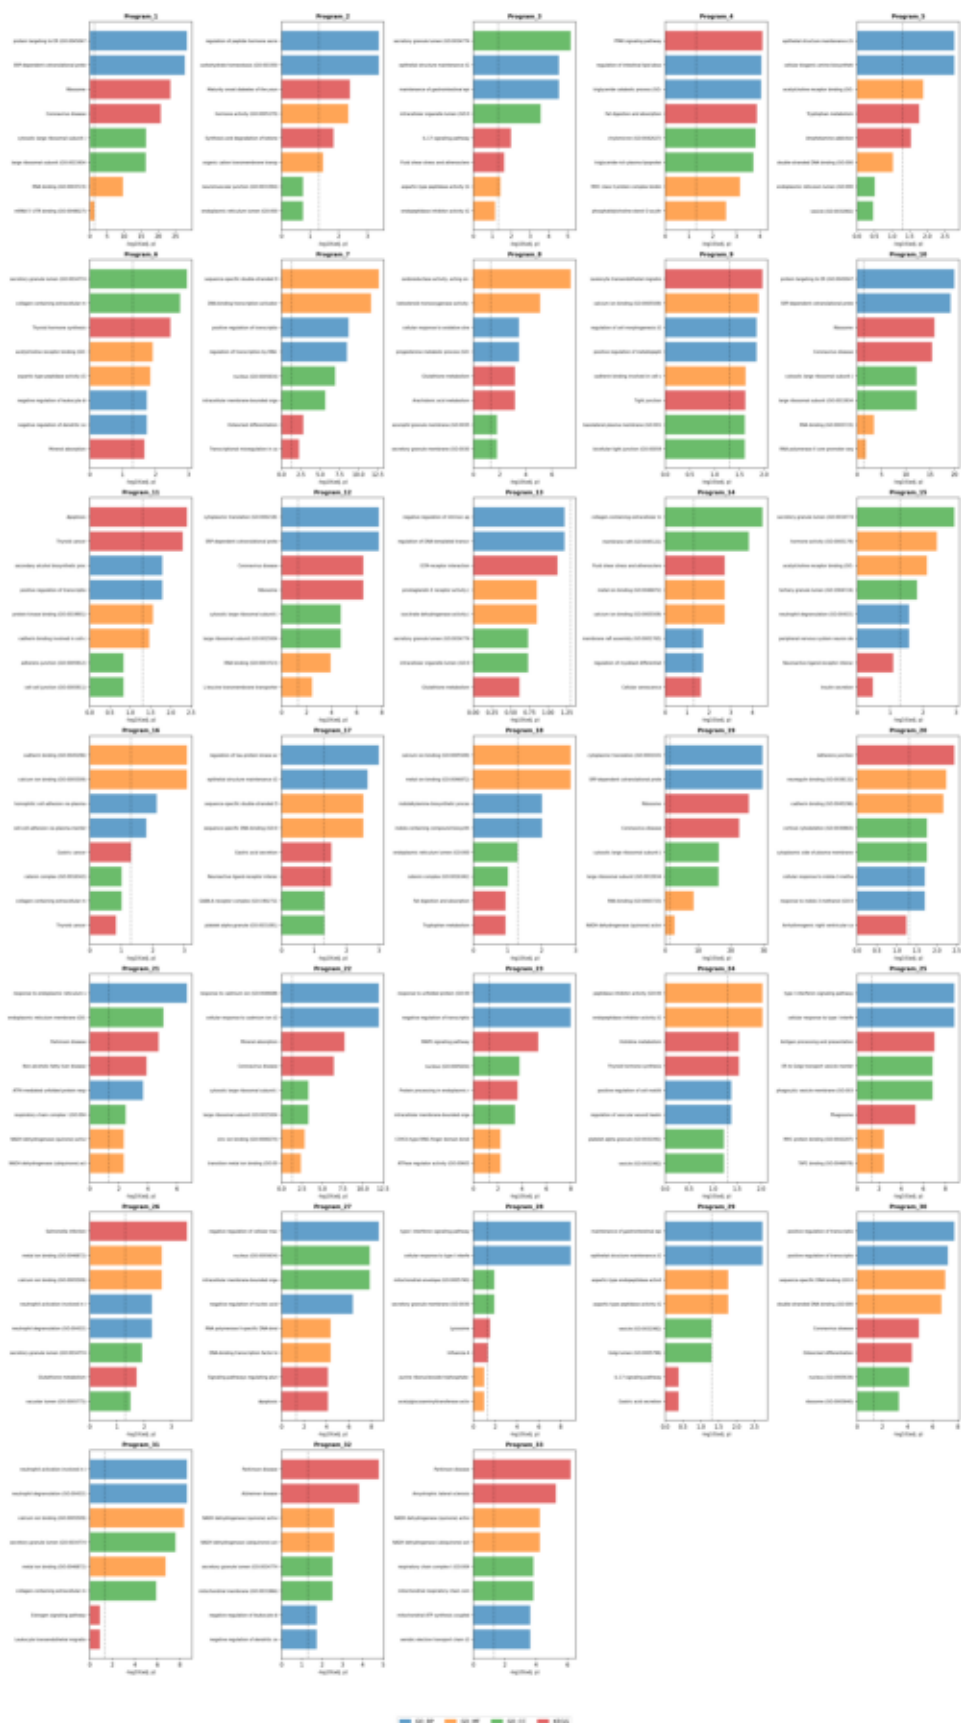

k = 34

Enrichment Analysis: All Programs (k=34)

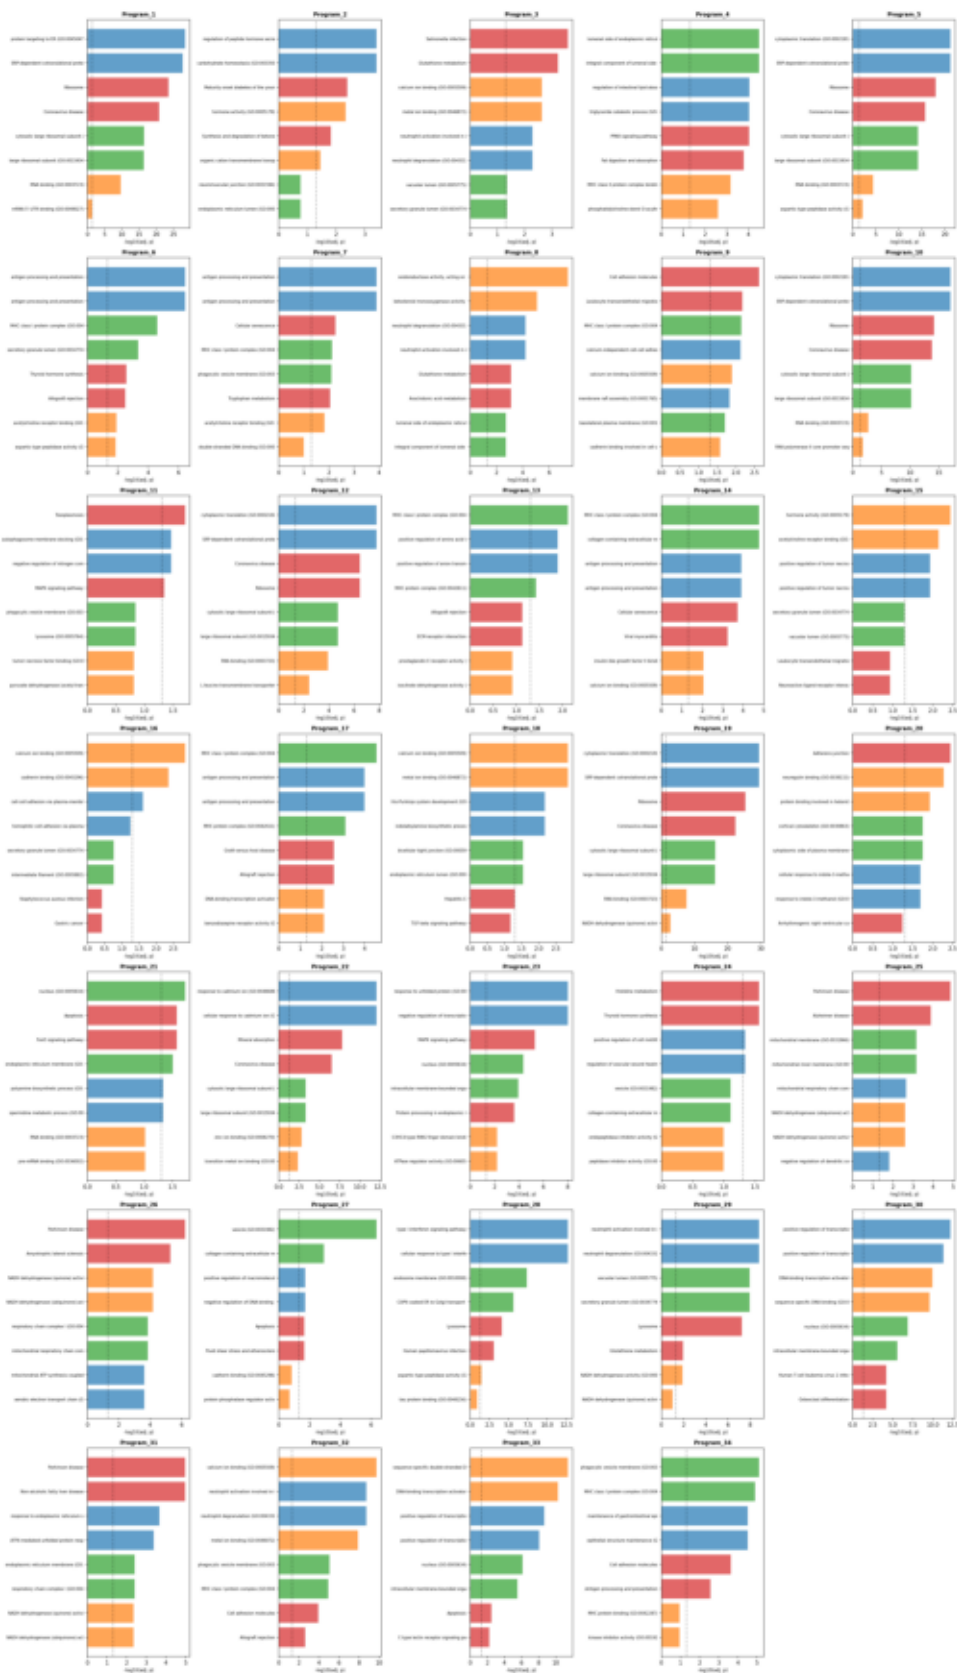

**k = 35**

**Enrichment Analysis: All Programs (k=35)**

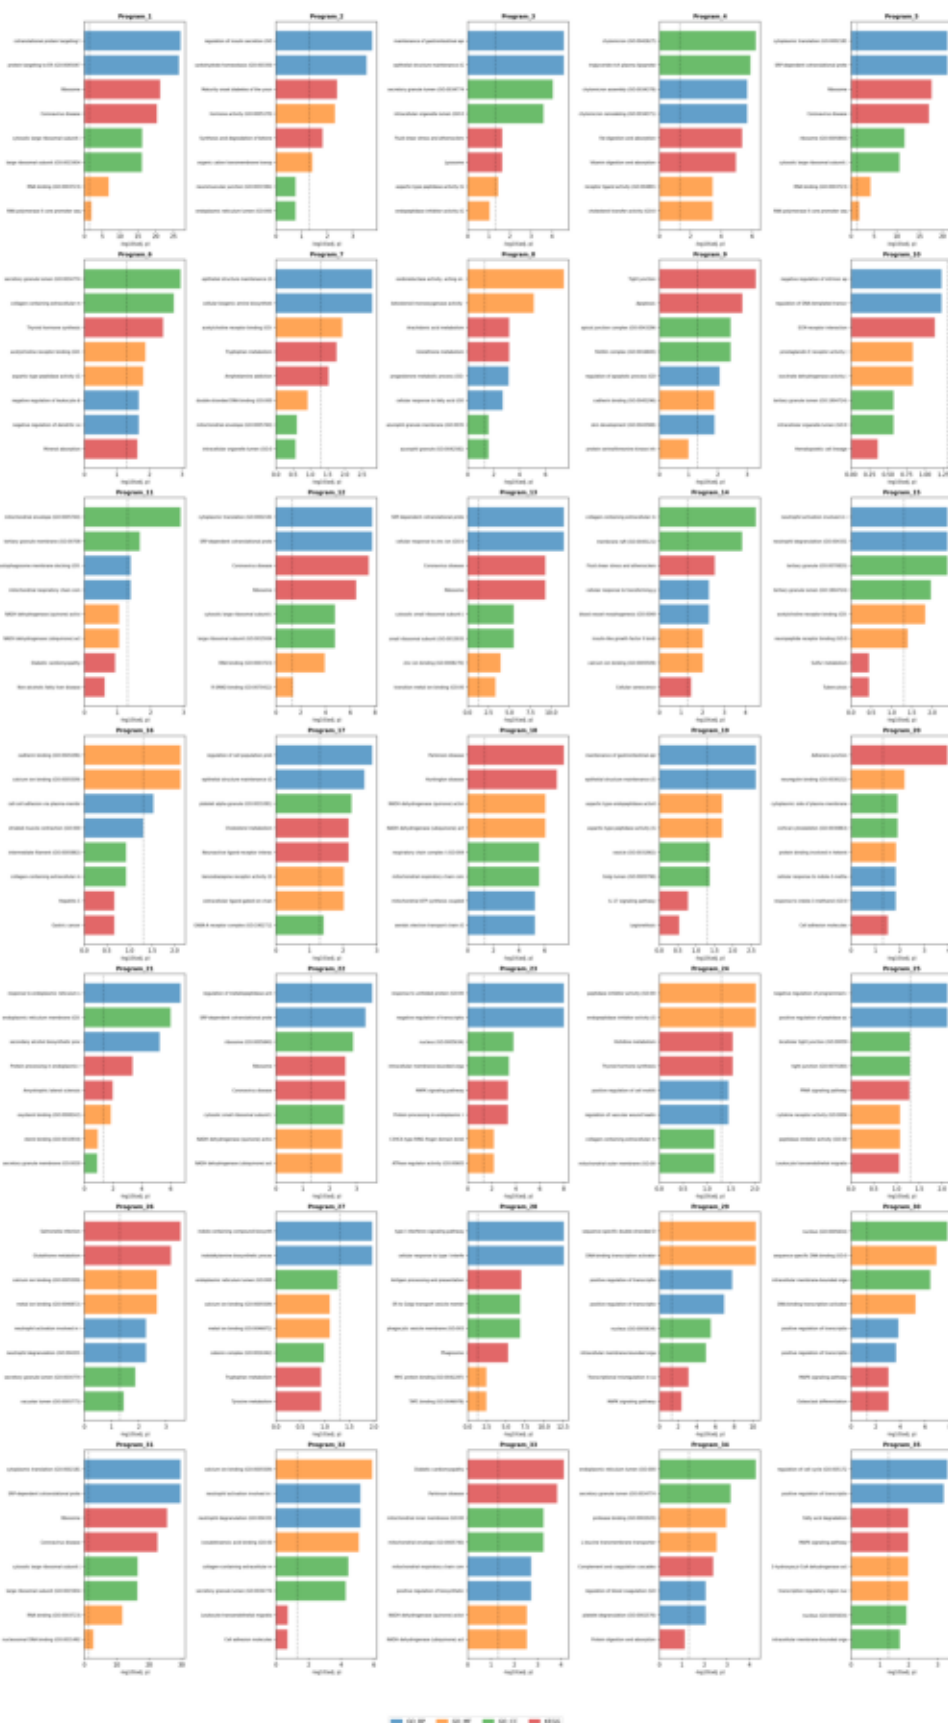

k = 36

Enrichment Analysis: All Programs (k=36)

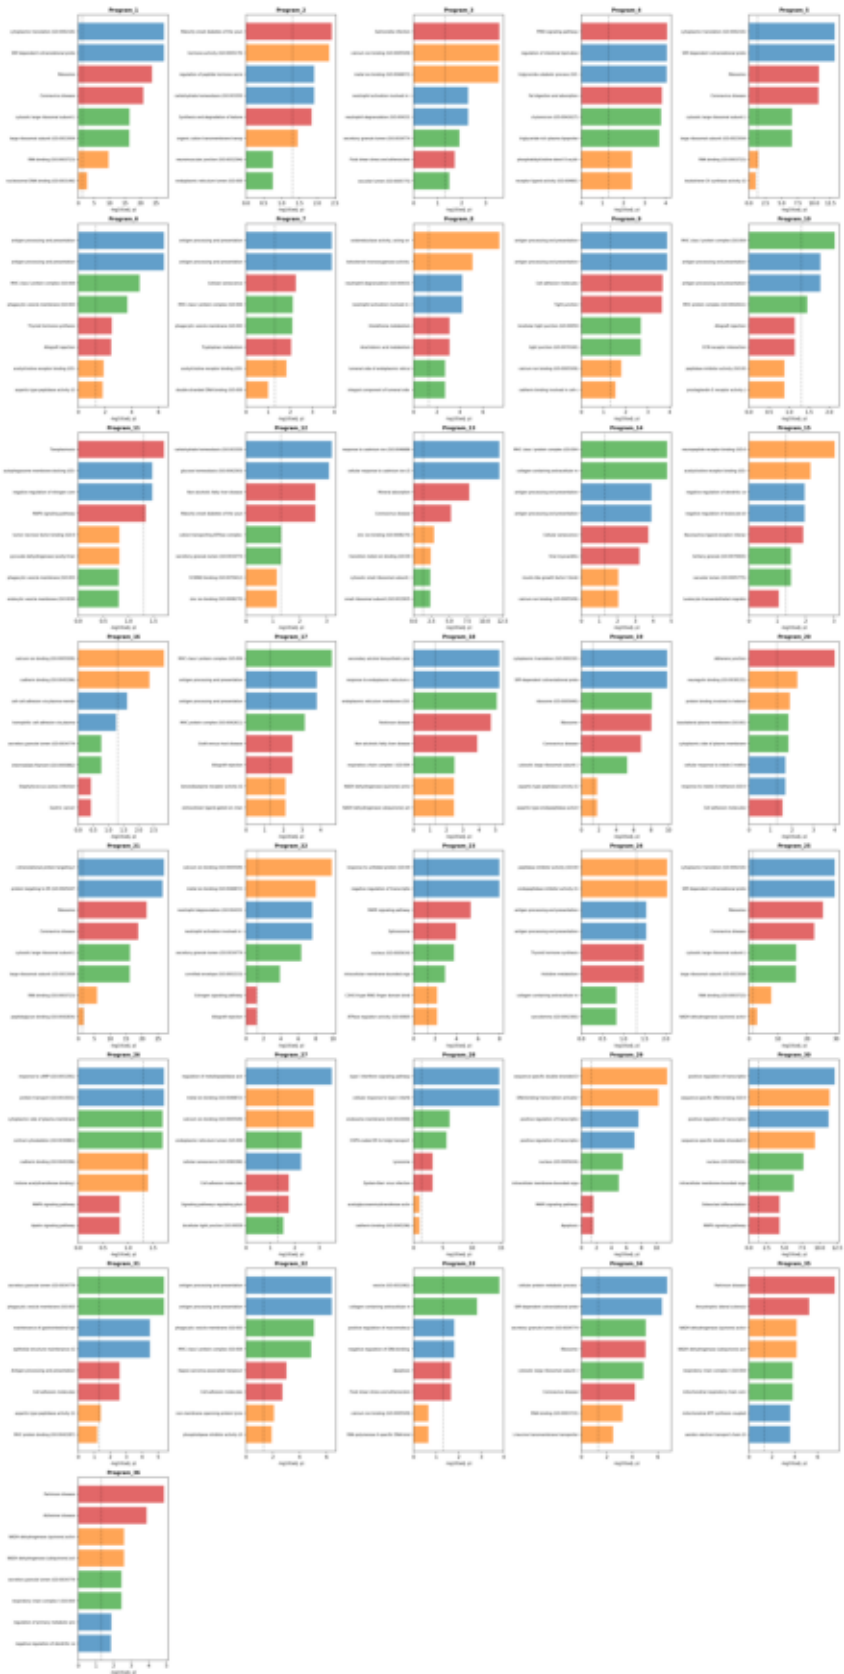

k = 37

Enrichment Analysis: AI Programs (k=37)

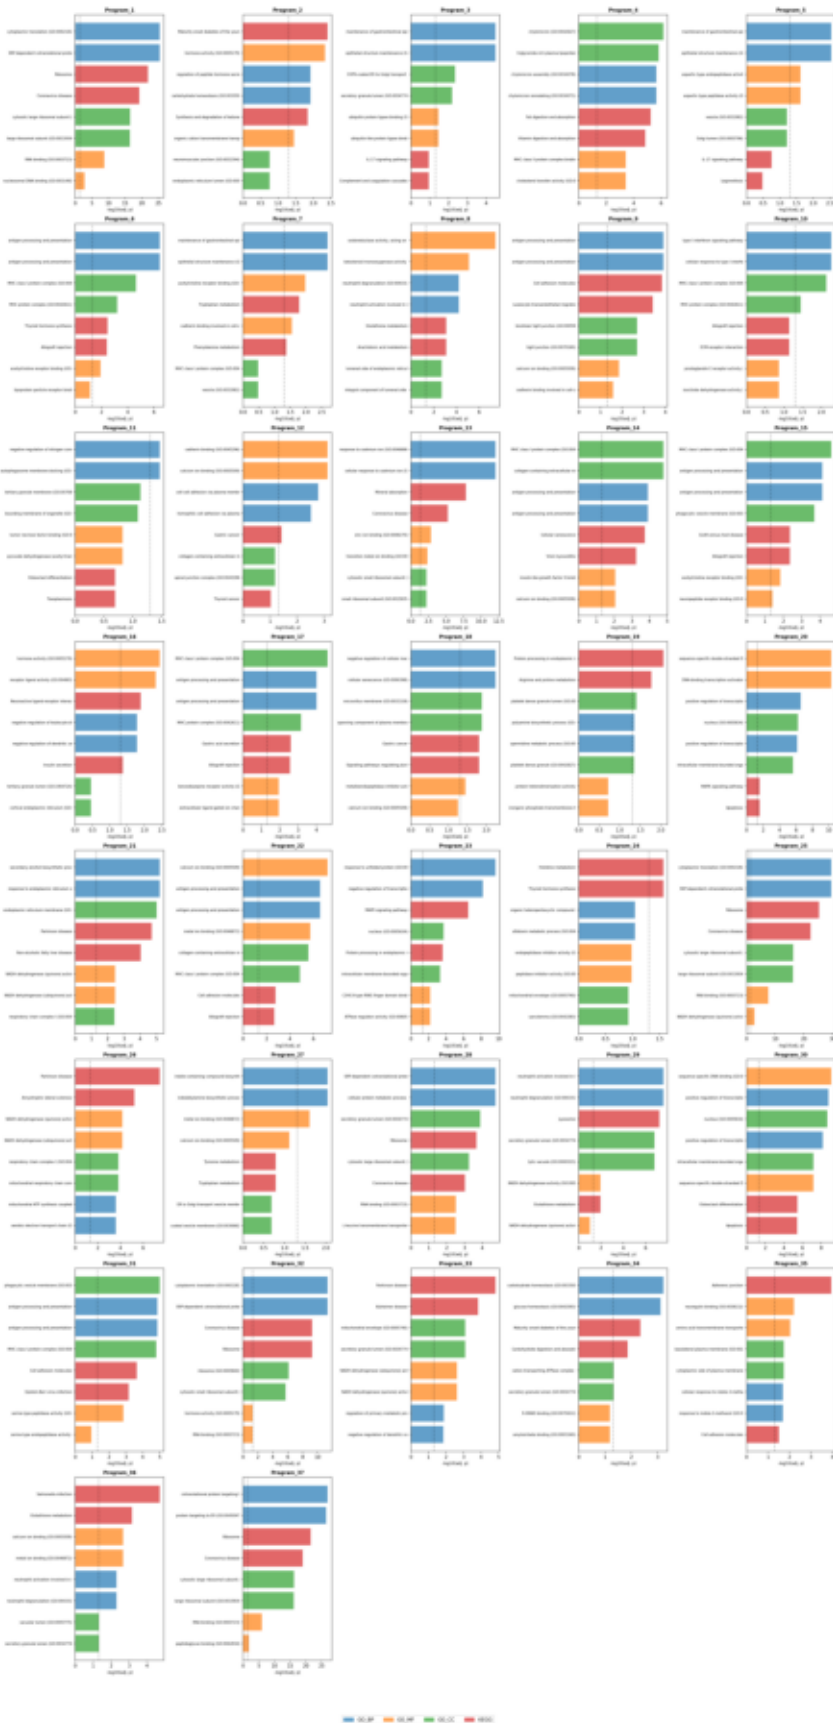

k = 38

Enrichment Analysis: All Programs (k=38)

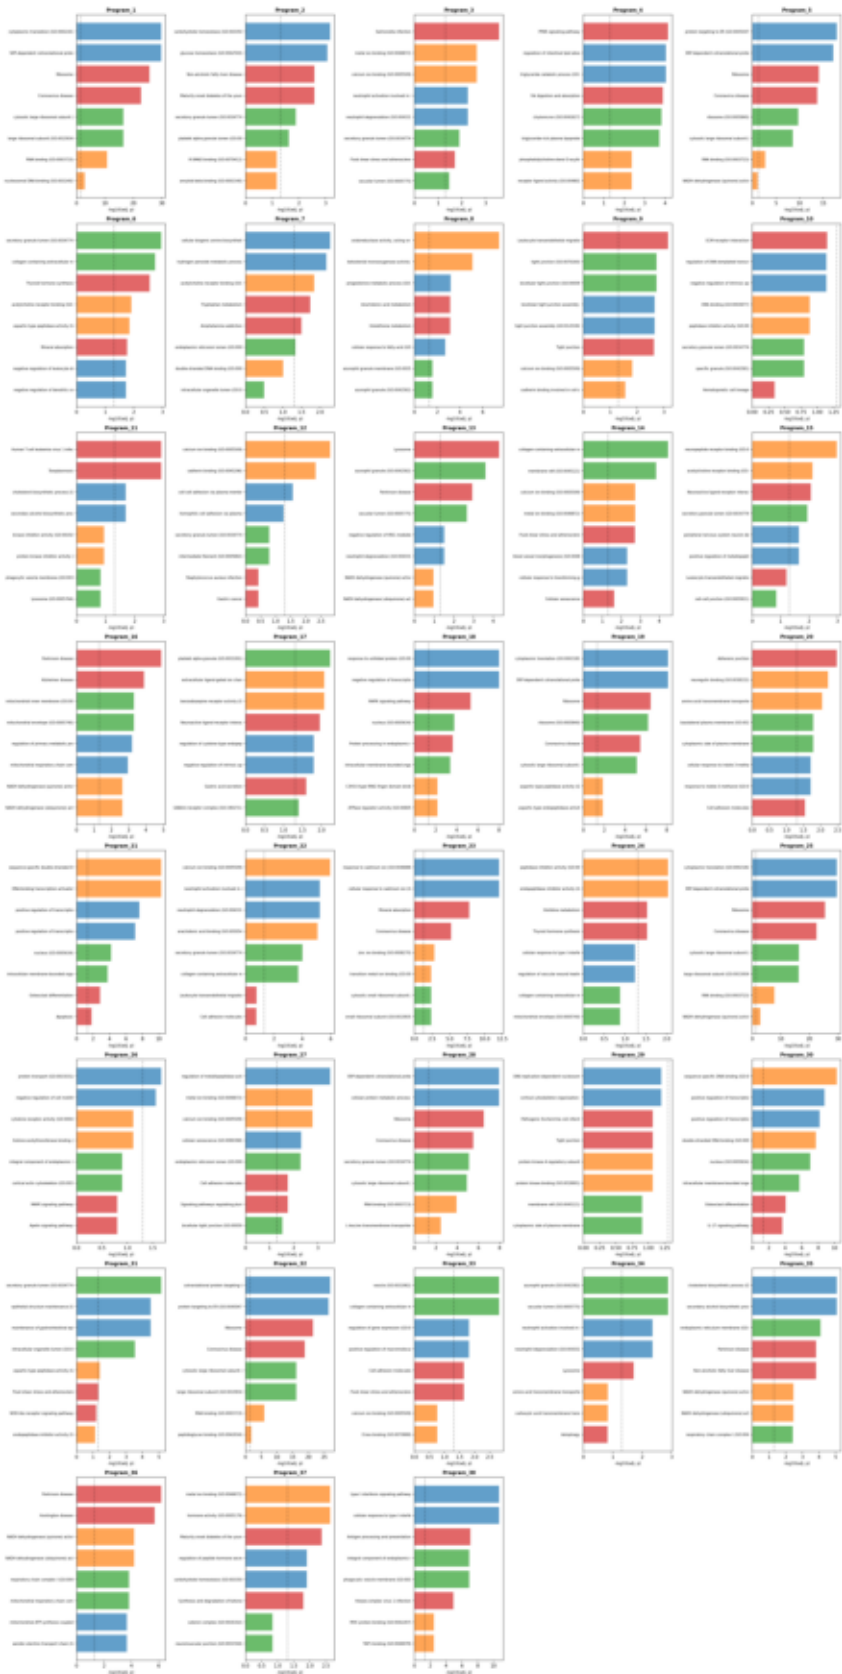

k = 39

Enrichment Analysis: All Programs (k=39)

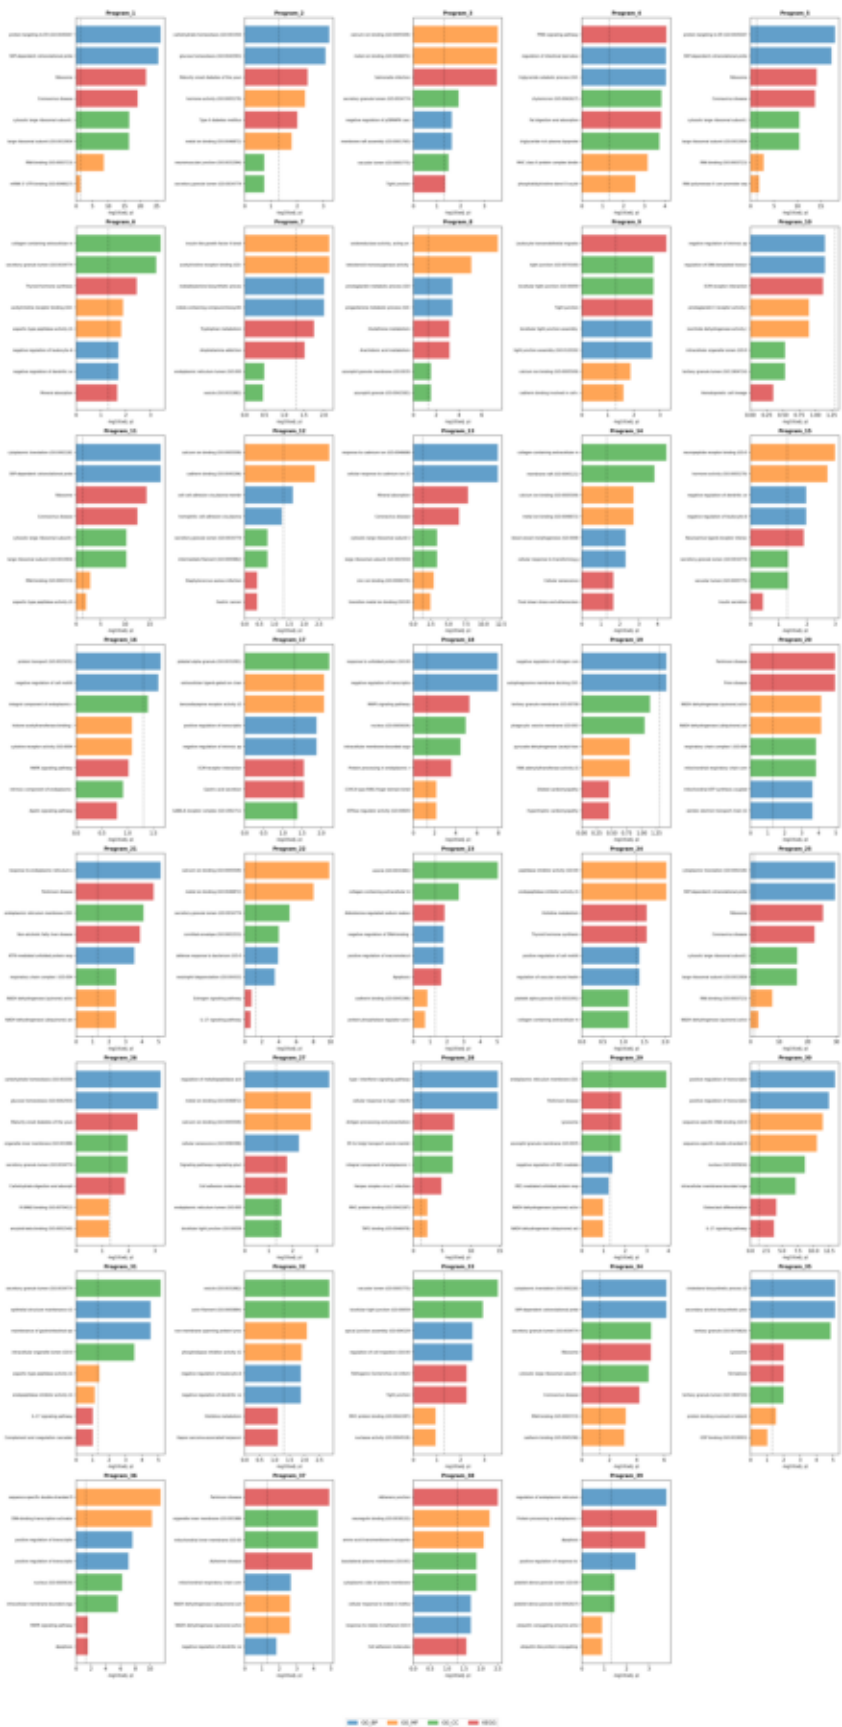

k = 40

Enrichment Analysis: All Programs (k=40)

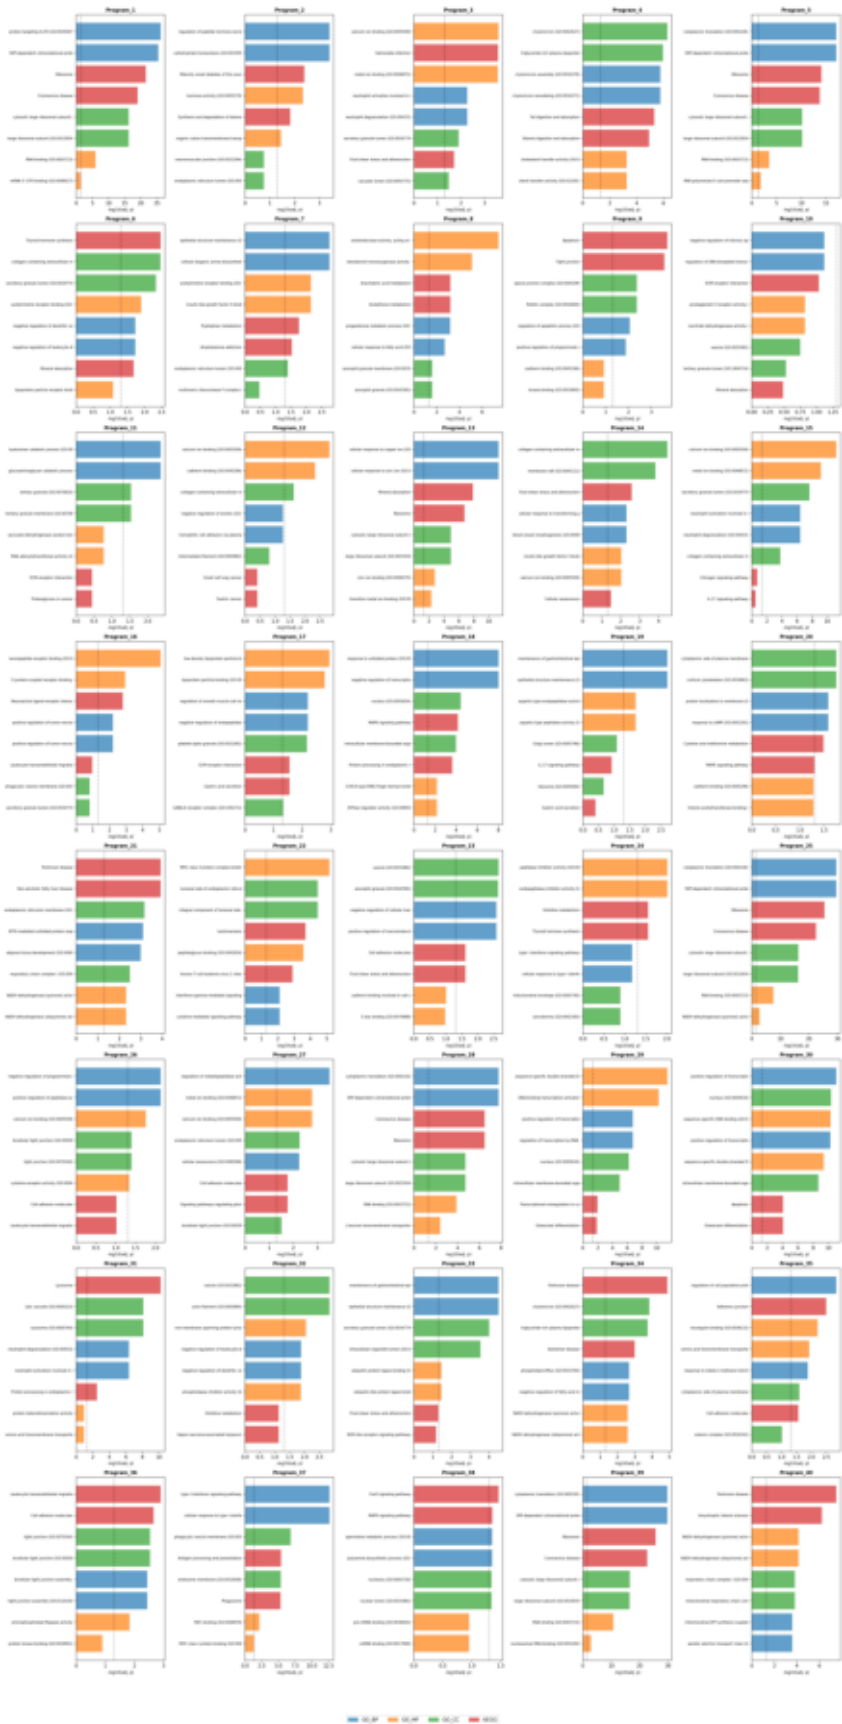



k = 41

Enrichment Analysis: 40 Programs (k=41)

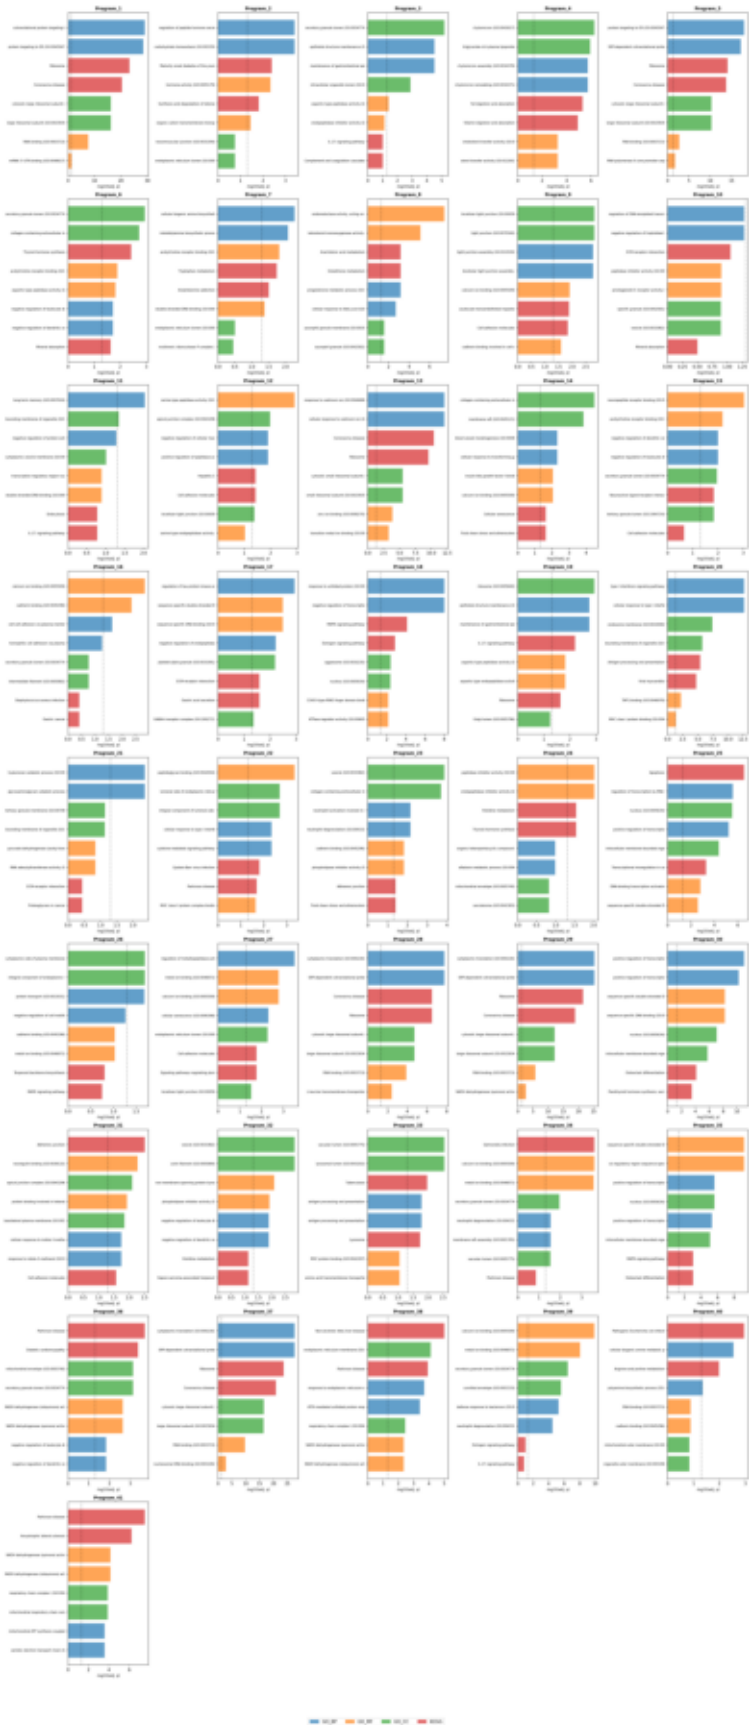

k = 42

Enrichment Analysis: All Programs (k=42)

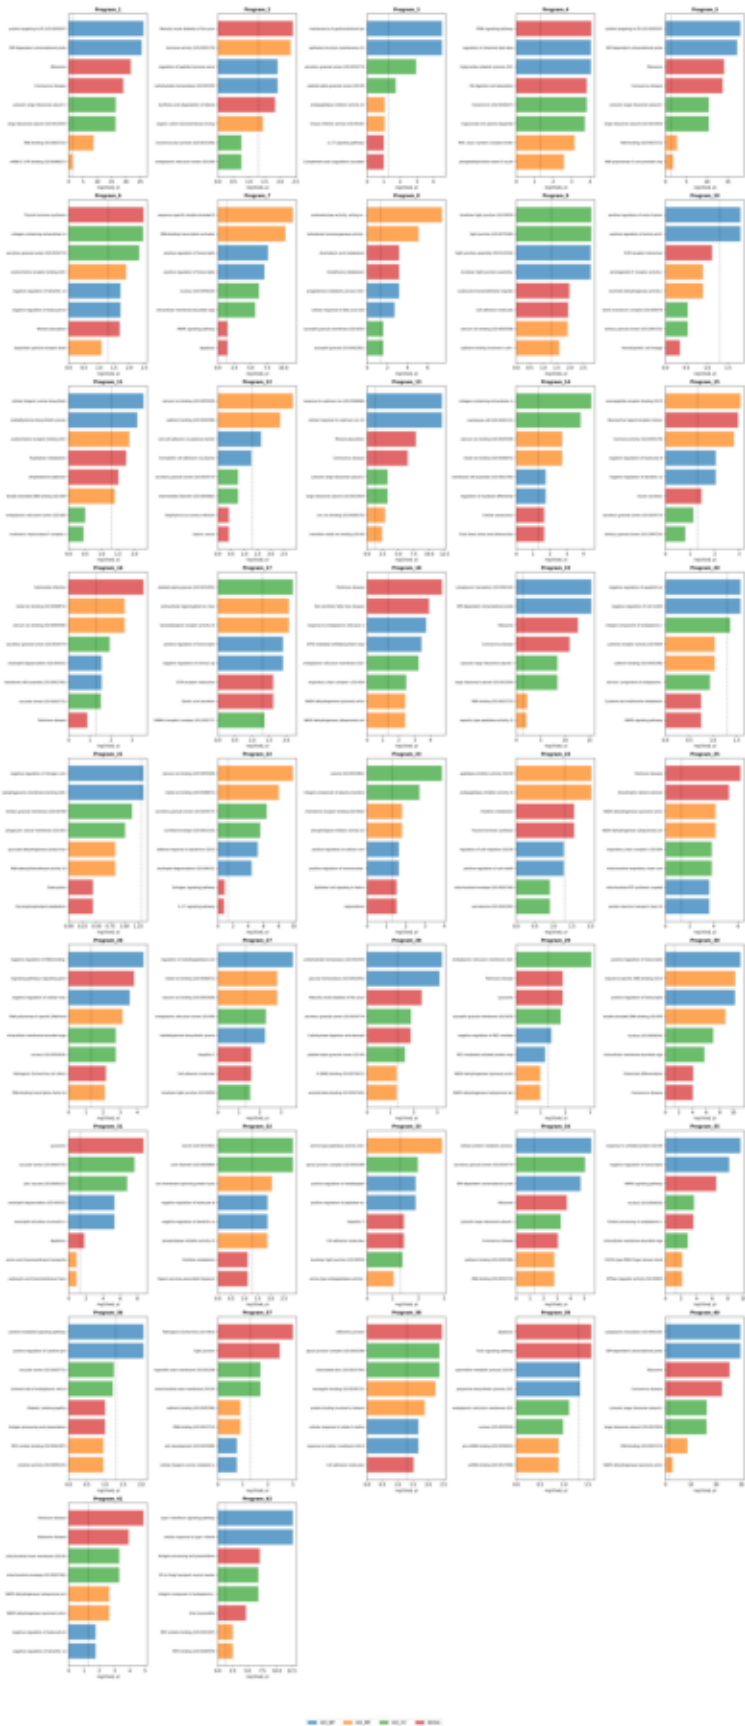

k = 43

Enrichment Analysis: All Programs (k=43)

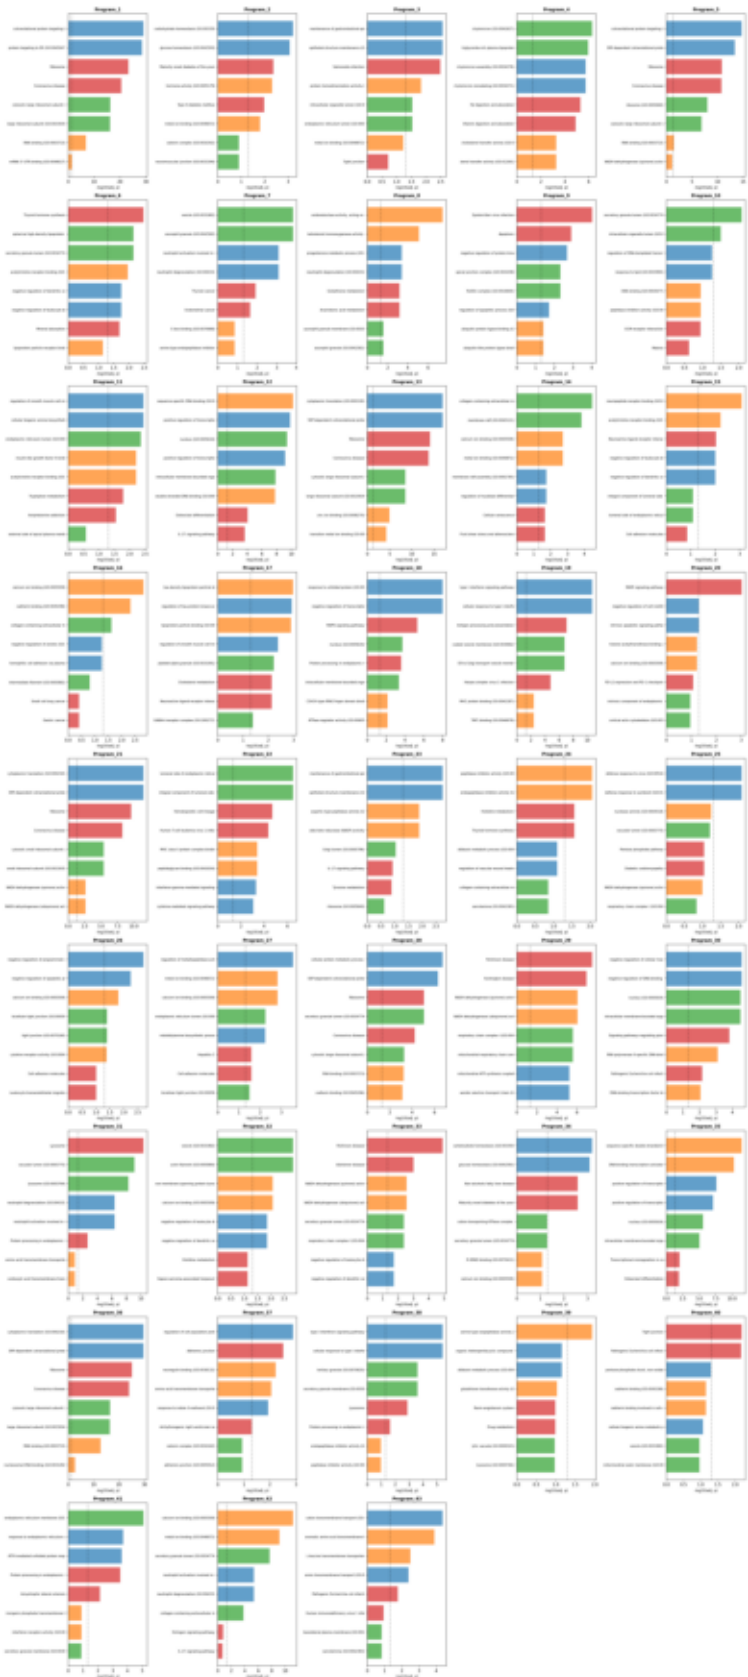

k = 44

Enrichment Analysis: All Programs (k=44)

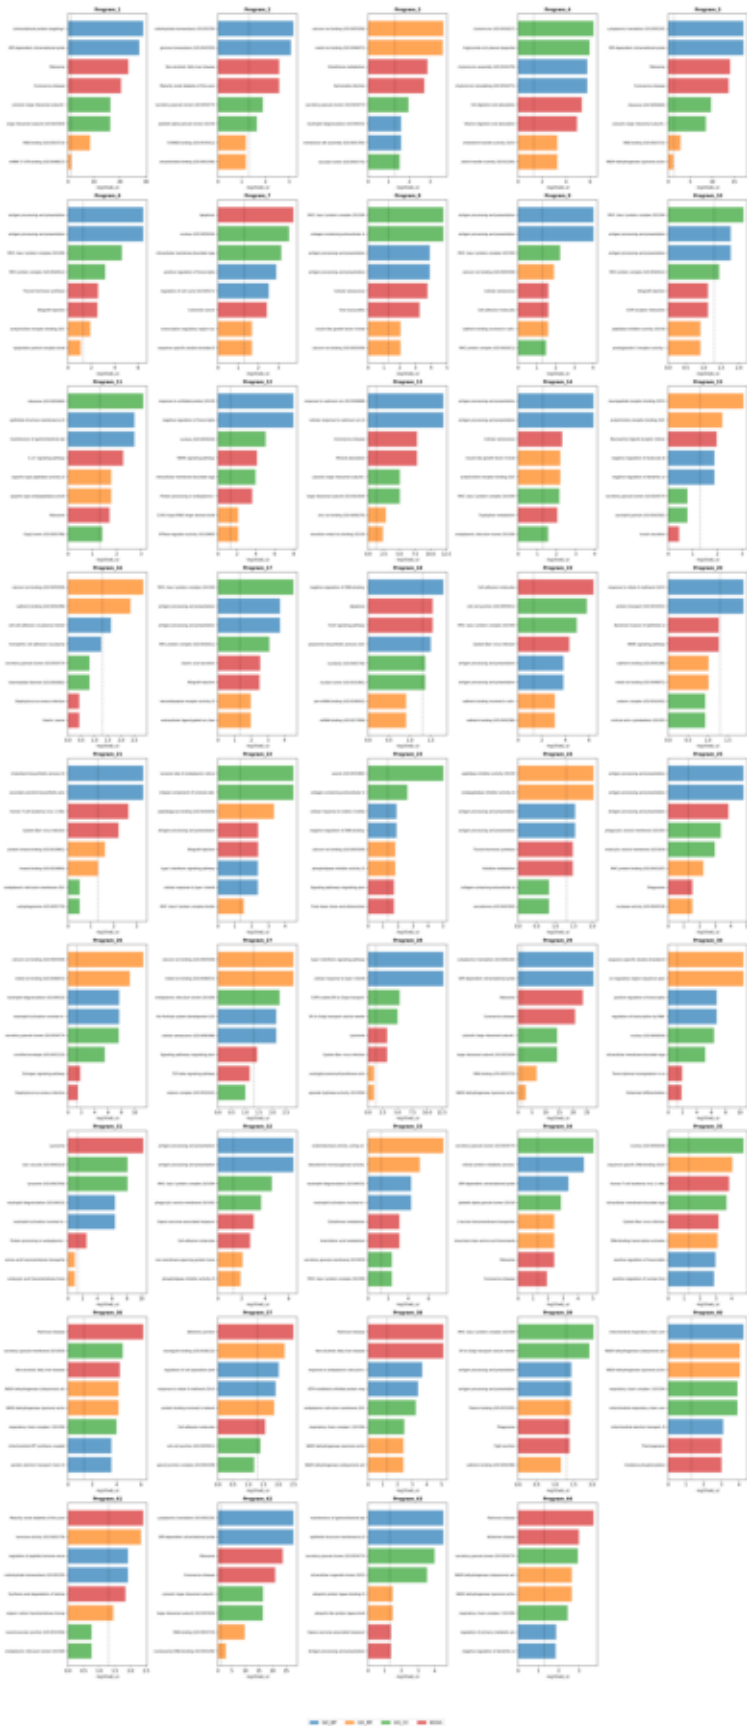

k = 45

Enrichment Analysis: 45 Programs (k=45)

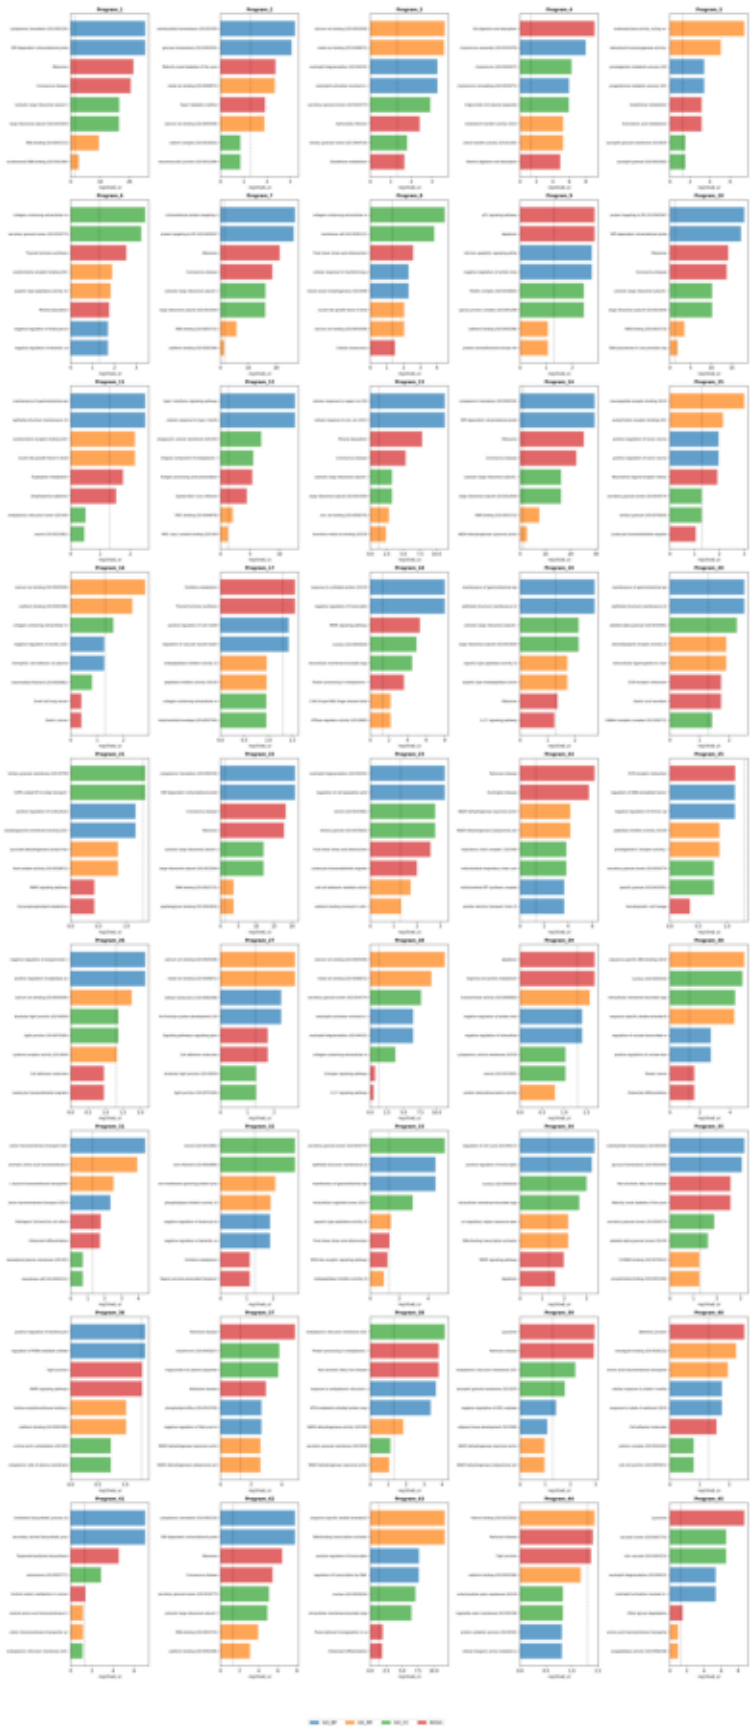

k = 46

Enrichment Analysis: All Programs (n=46)

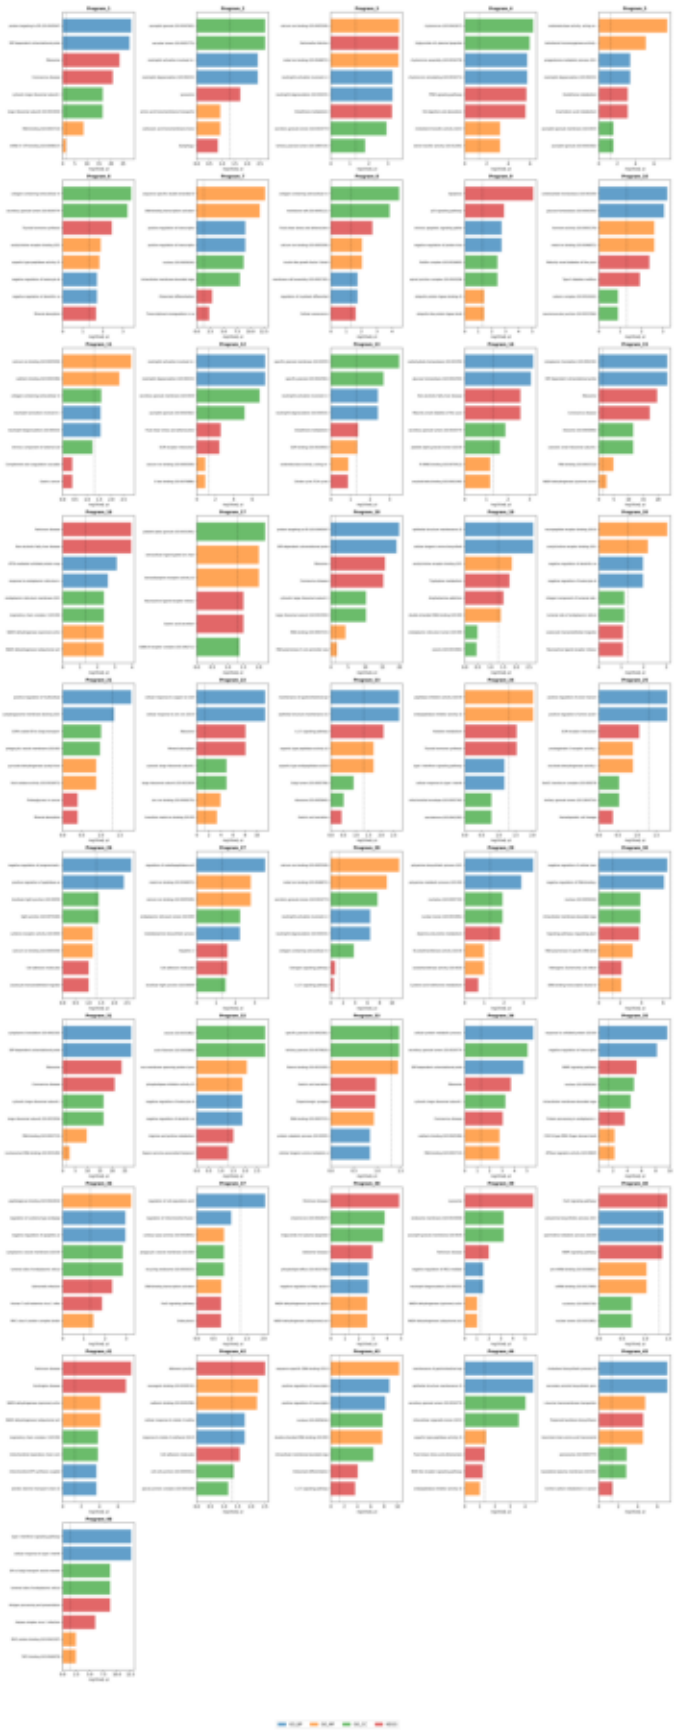

k = 47

Enrichment Analysis: All Programs (k=47)

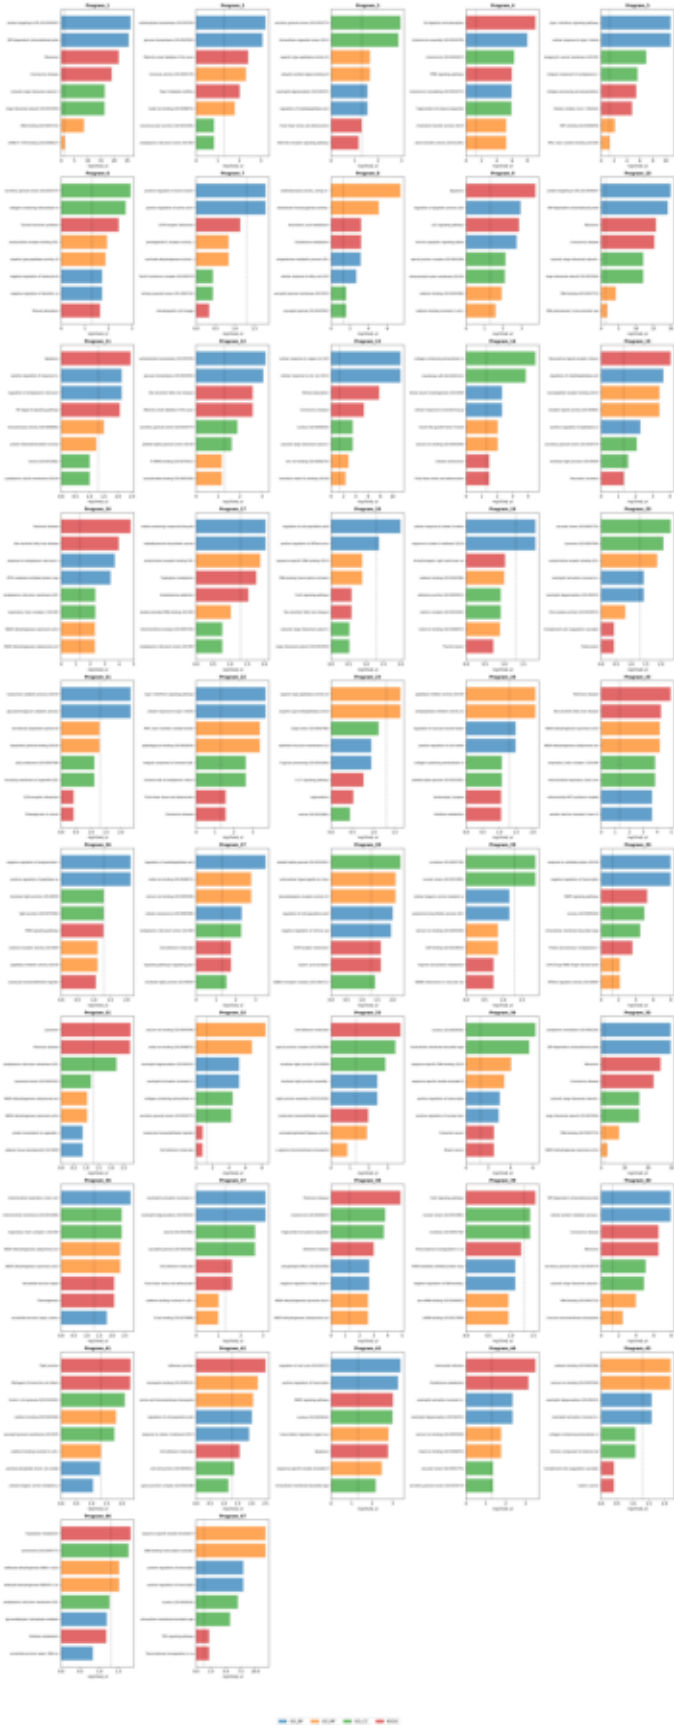

k = 48

Enrichment Analysis: All Programs (k=48)

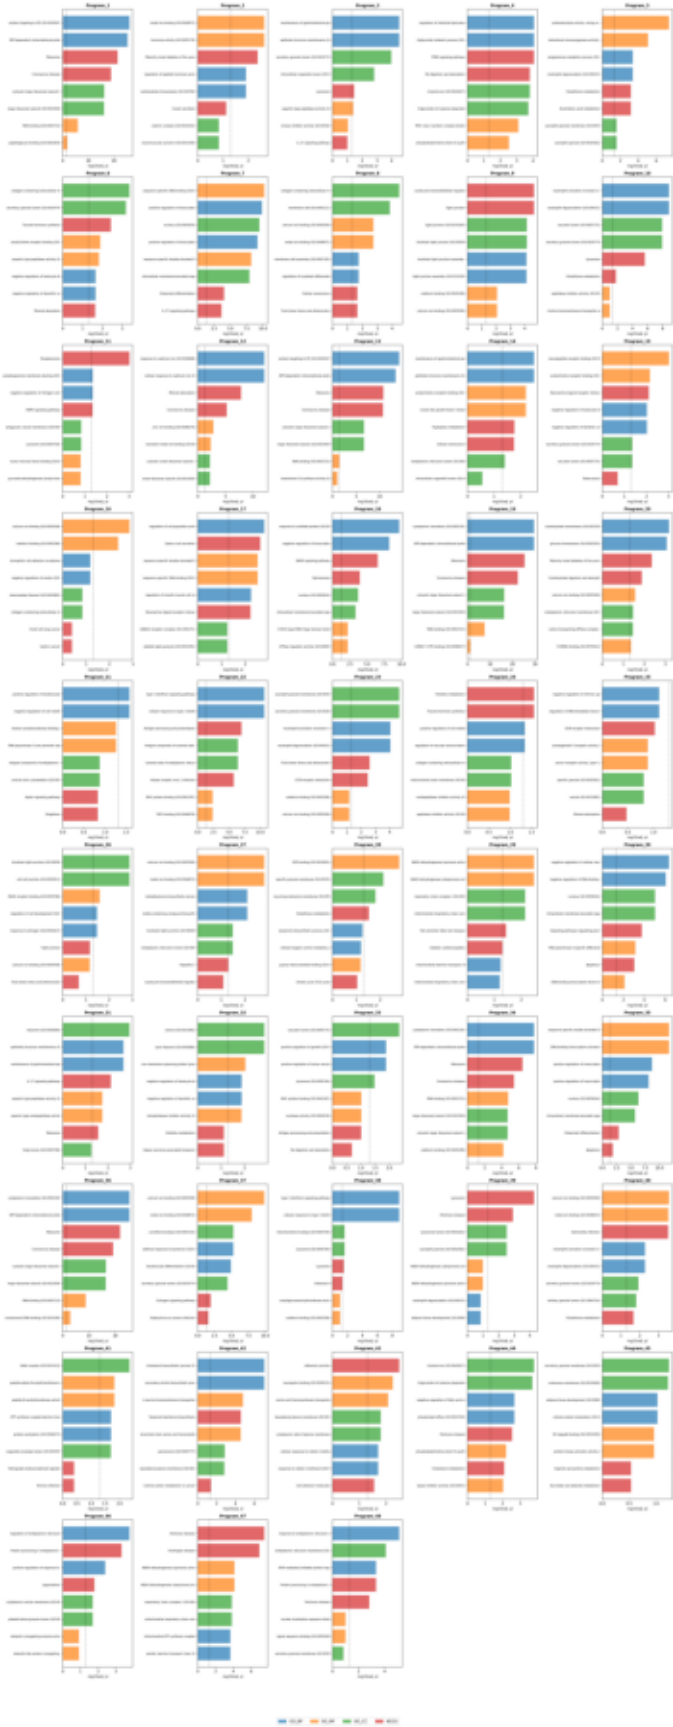



k = 49

Enrichment Analysis: All Programs (k=49)

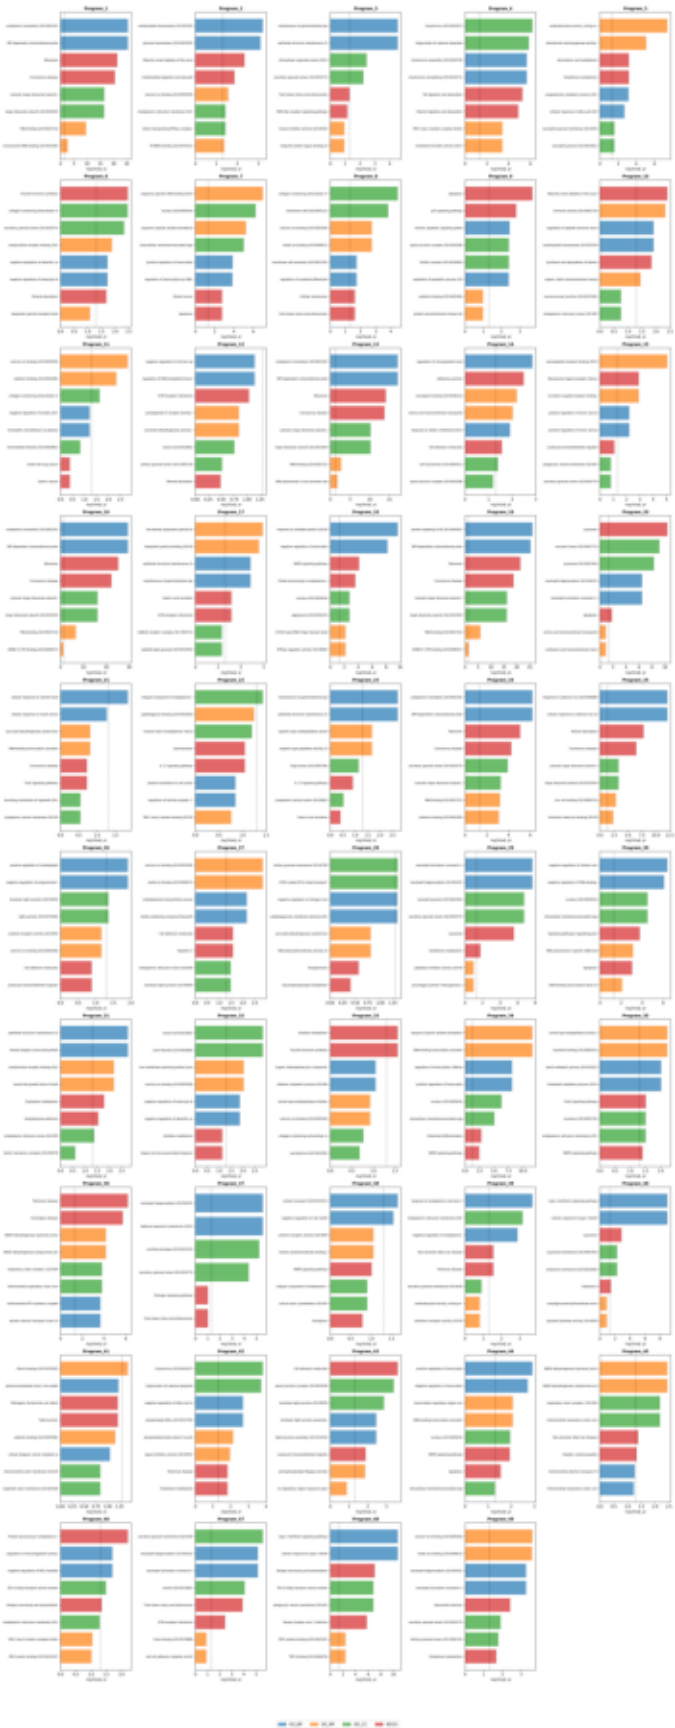

# k = 50

Enrichment Analysis: All Programs (k=50)

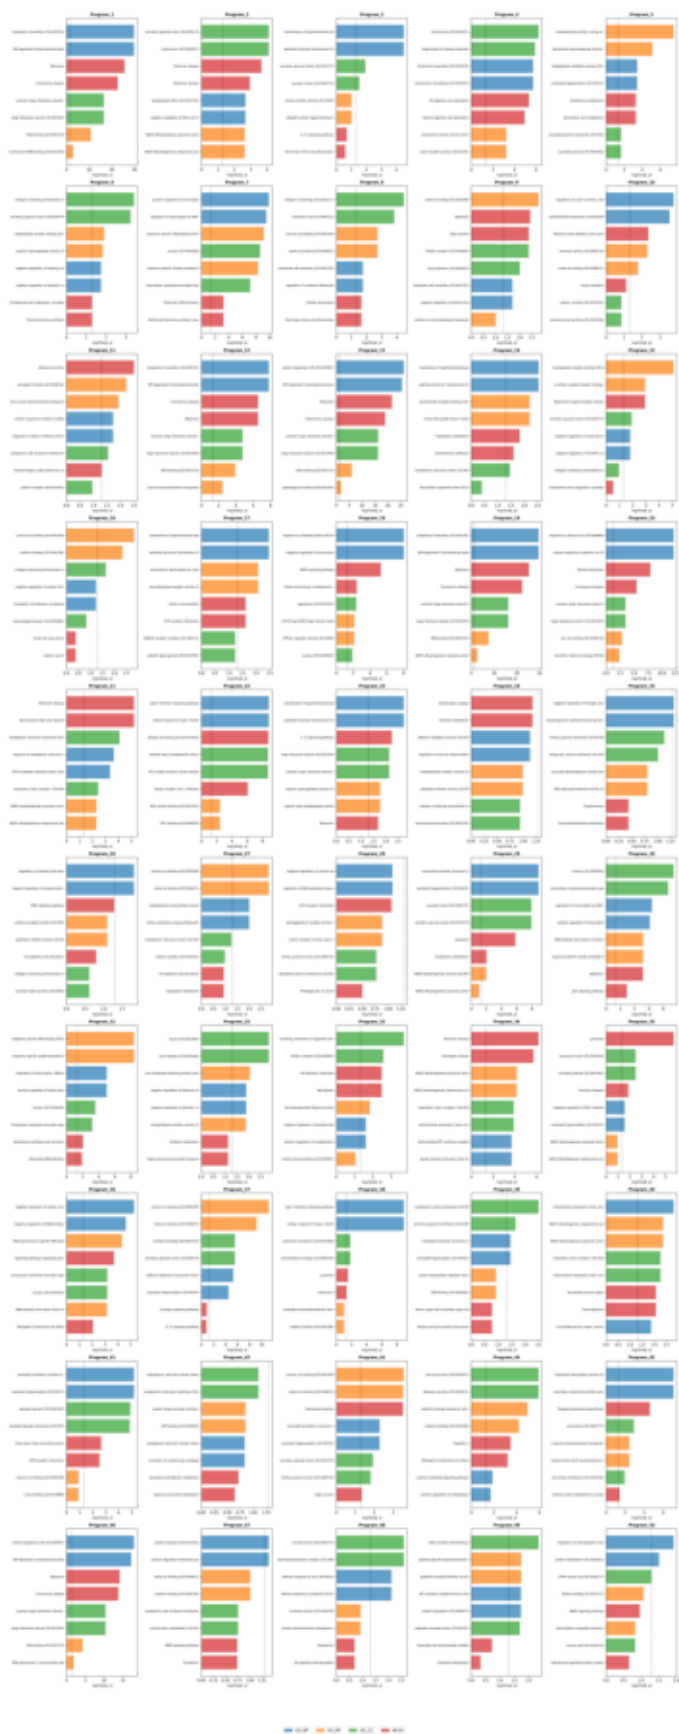

Supplement: supplementary_material [file all_programs_enrichment_combined_k10_to_k50.pdf › scenic_nmf/files/NMF/all_programs_enrichment_combined_k10_to_k50.pdf]
