# Supplementary material
Source: ML conference proceedings conference paper supplement (https://openreview.net/forum?id=h40Nyr36om)
Supplement: supplementary_material [file activity_by_tissue_k10_to_k50.pdf › scenic_nmf/files/NMF/activity_by_tissue_k10_to_k50.pdf]

# NMF Analysis Results

Activity By Tissue

$k = 10$  to 50

Total analyses included: 41

*Program activity patterns across different tissue types*

**k = 10**

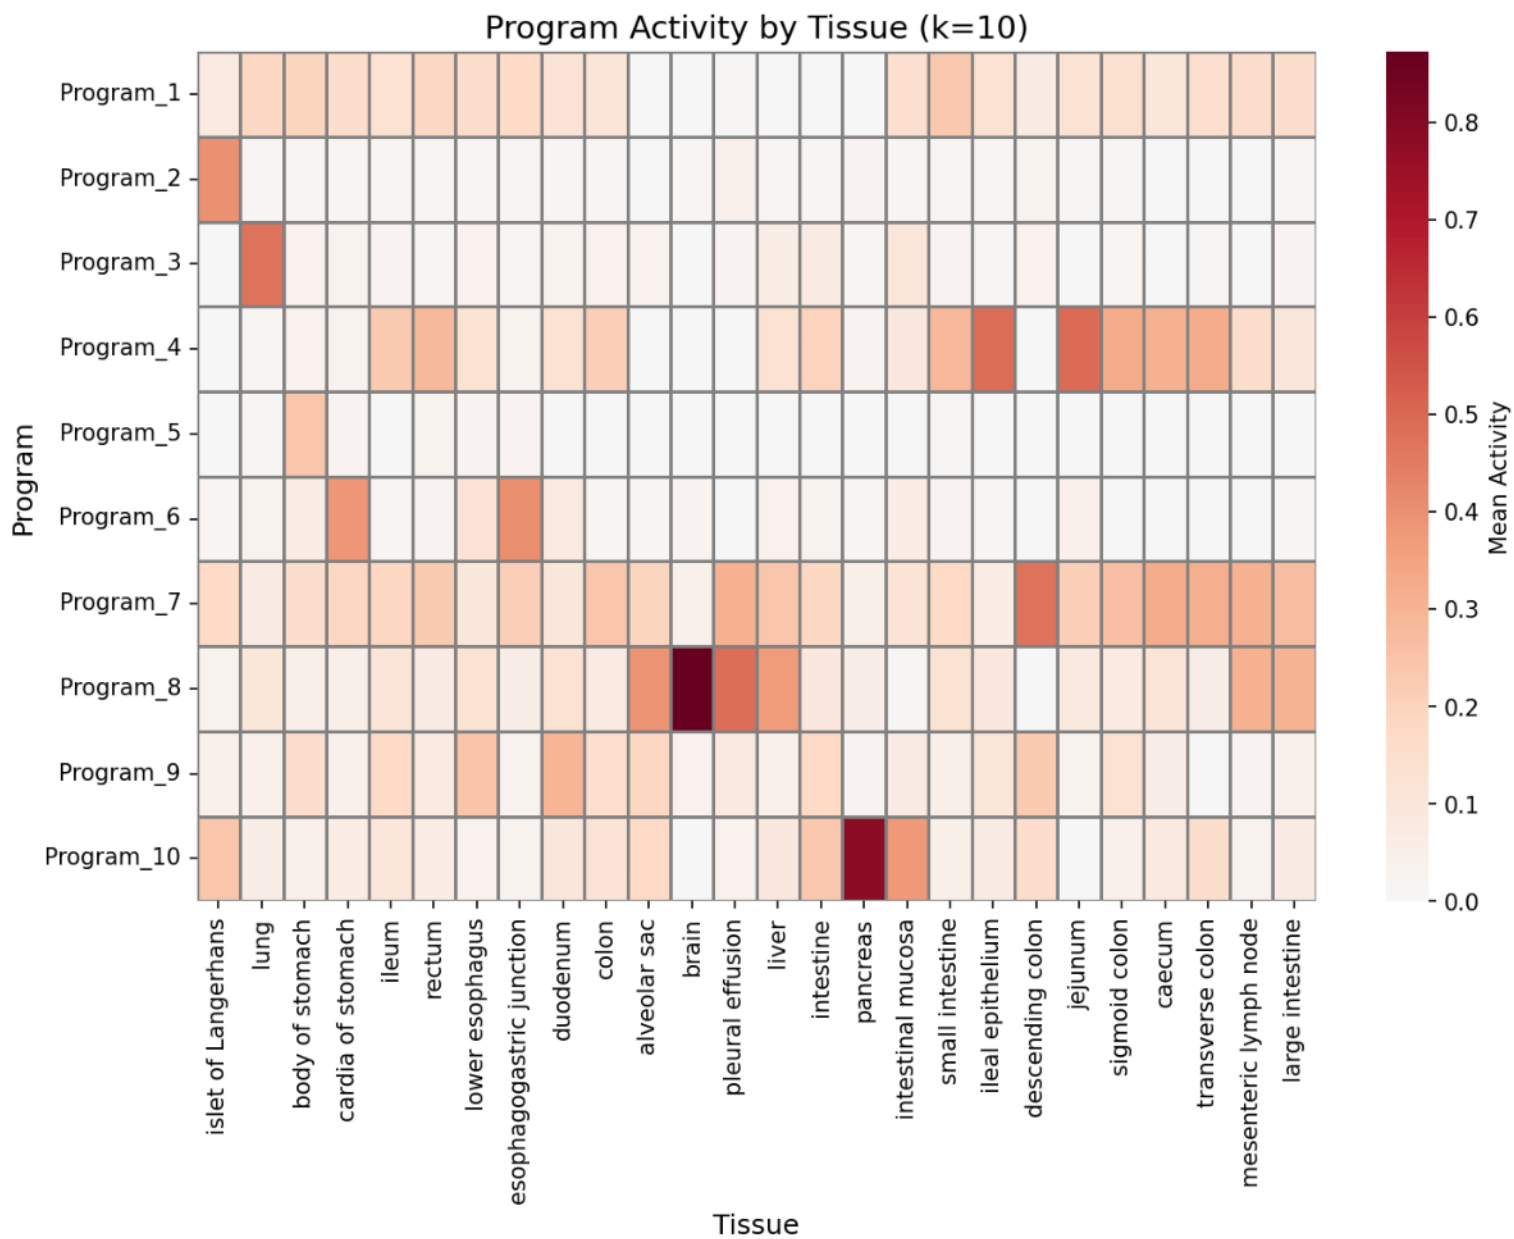

**k = 11**

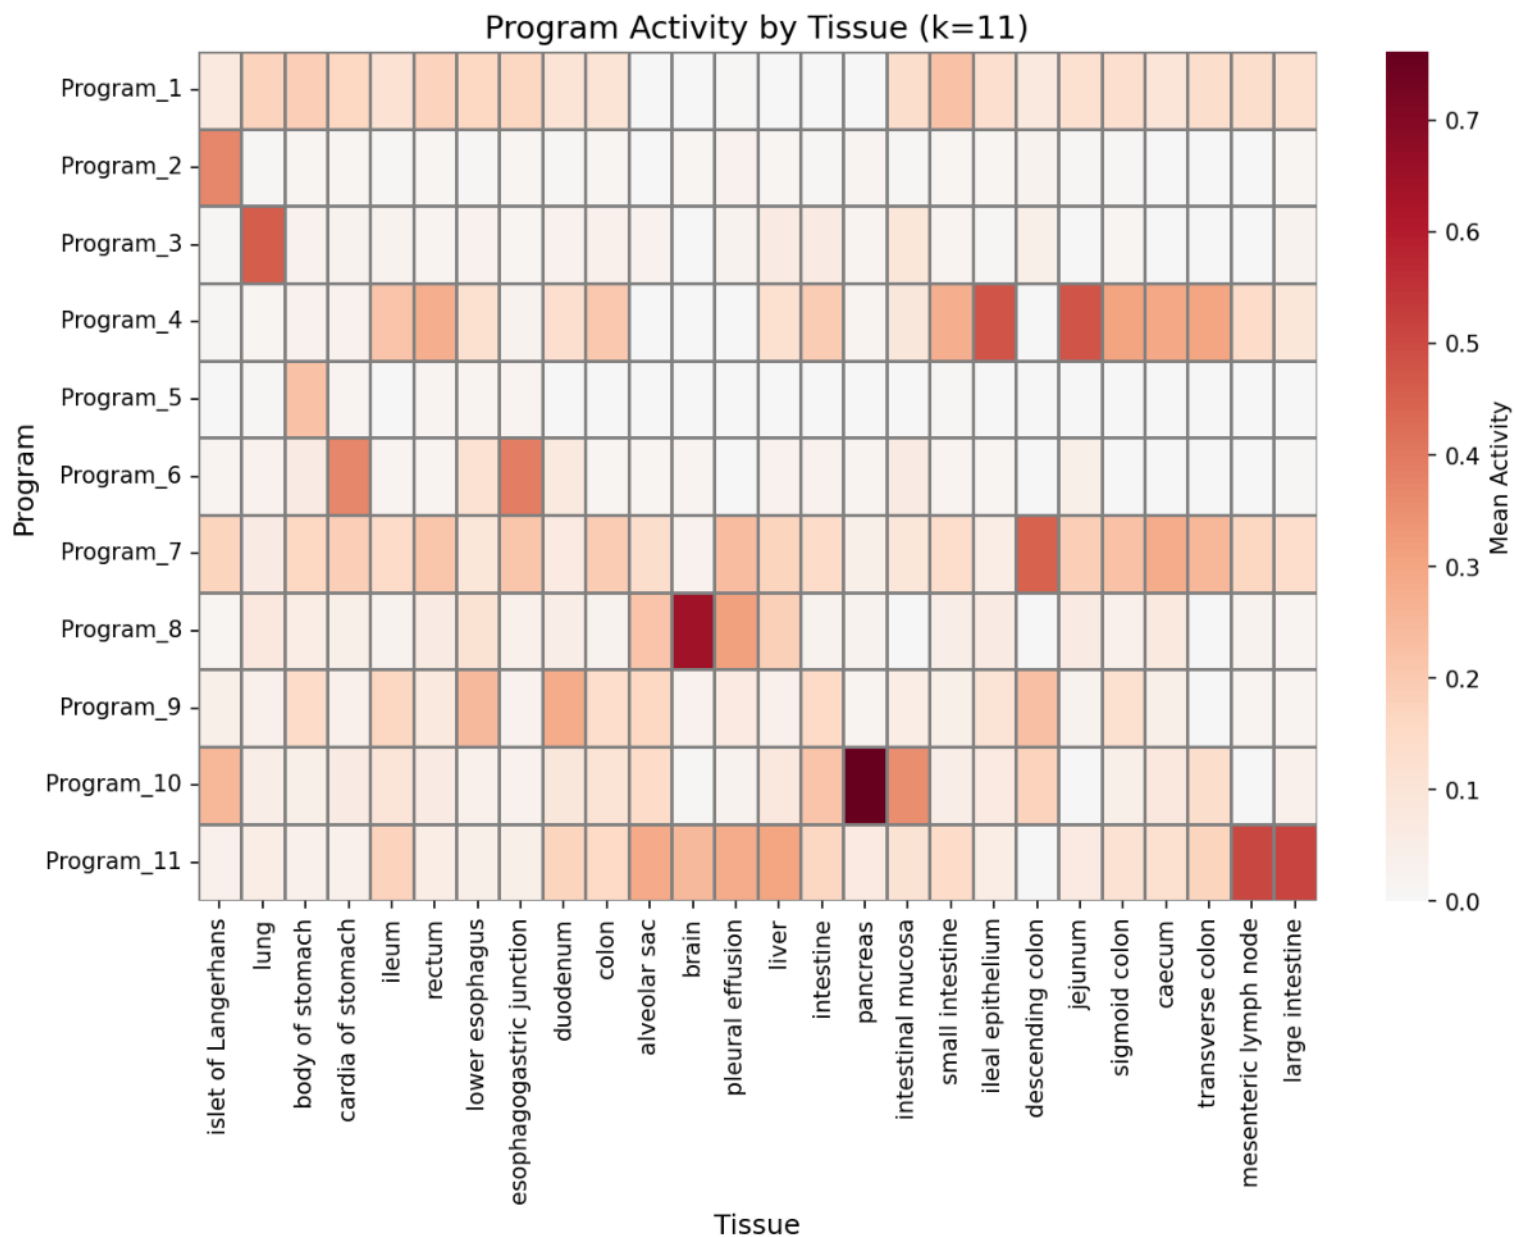

**k = 12**

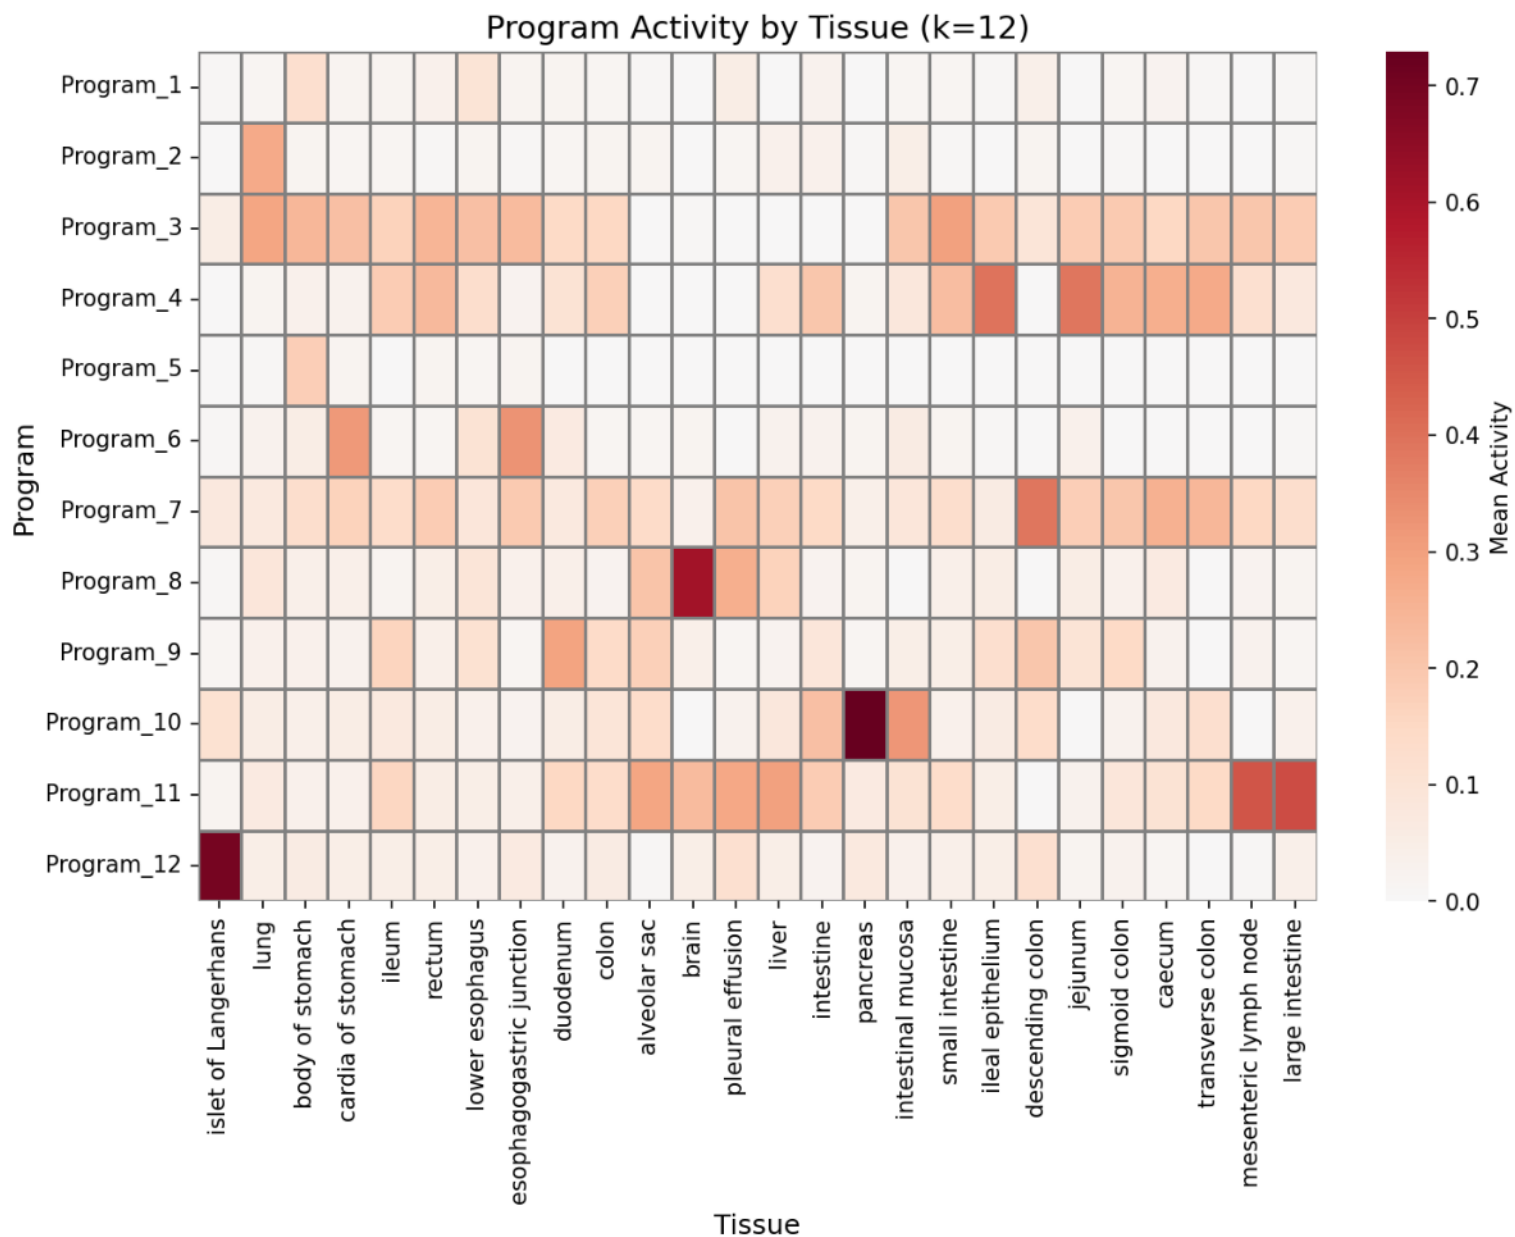

**k = 13**

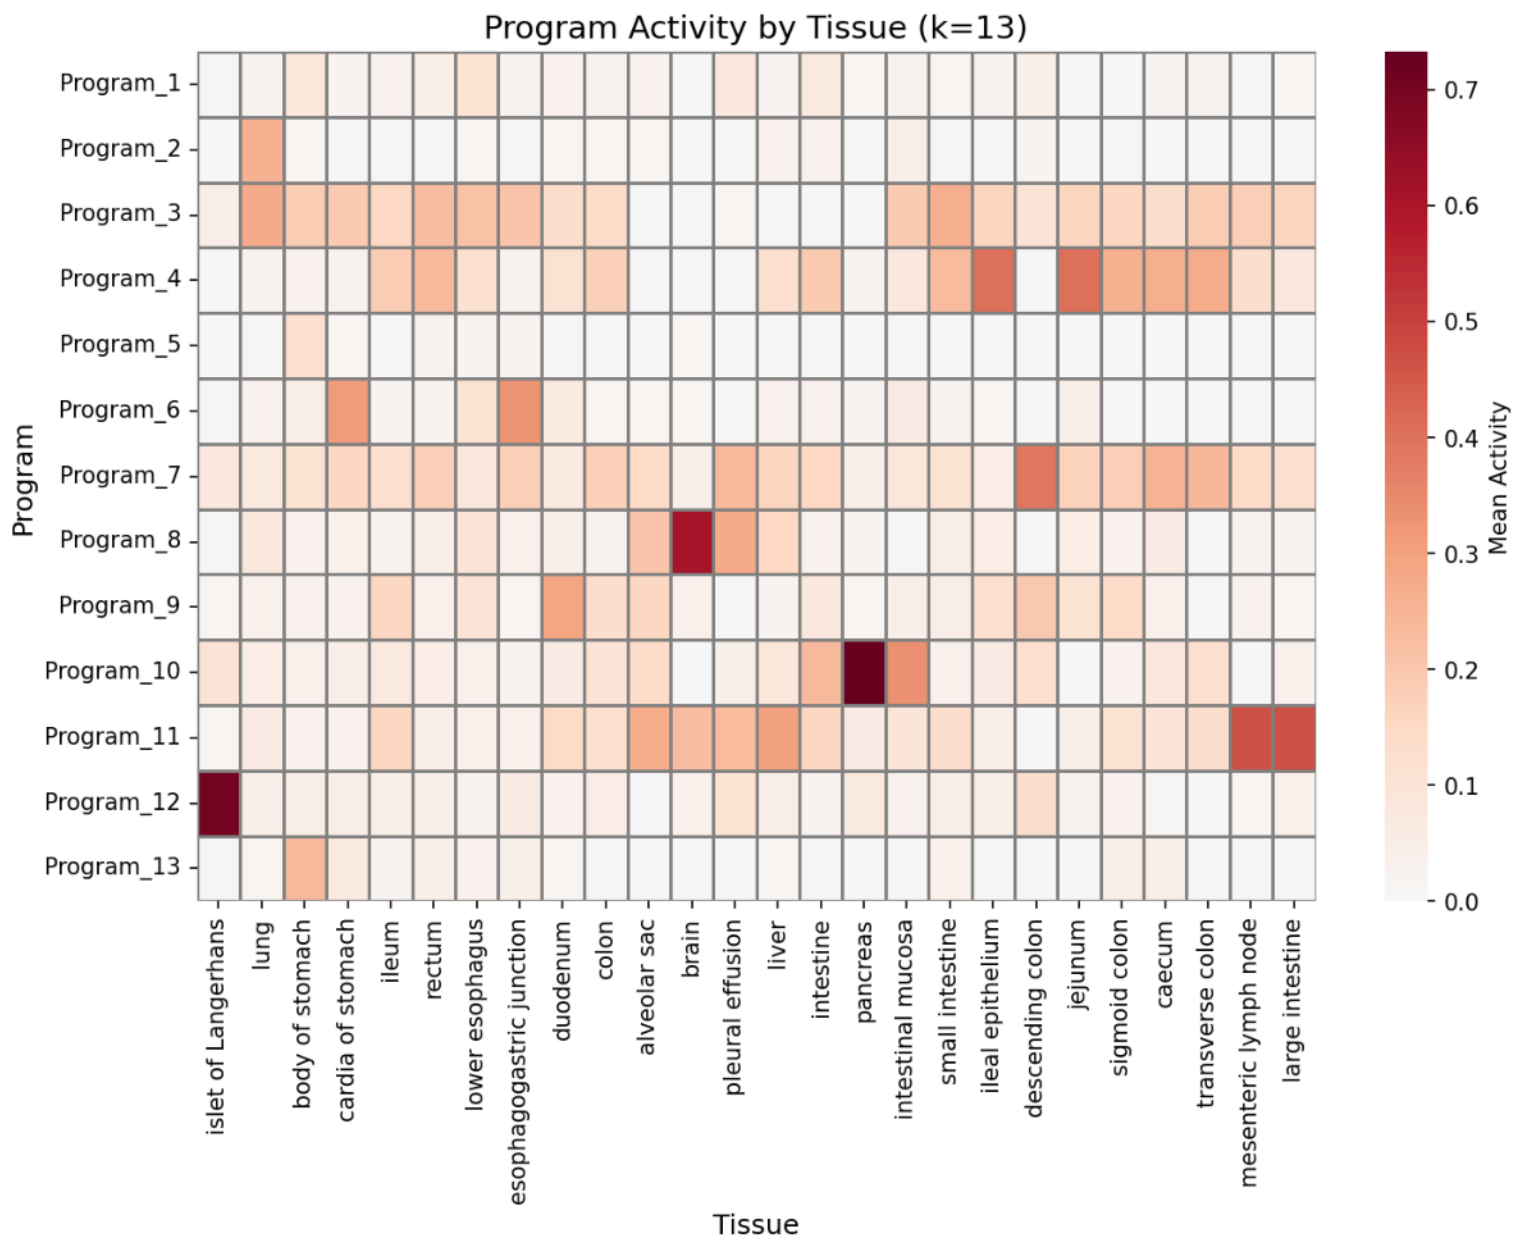

**k = 14**

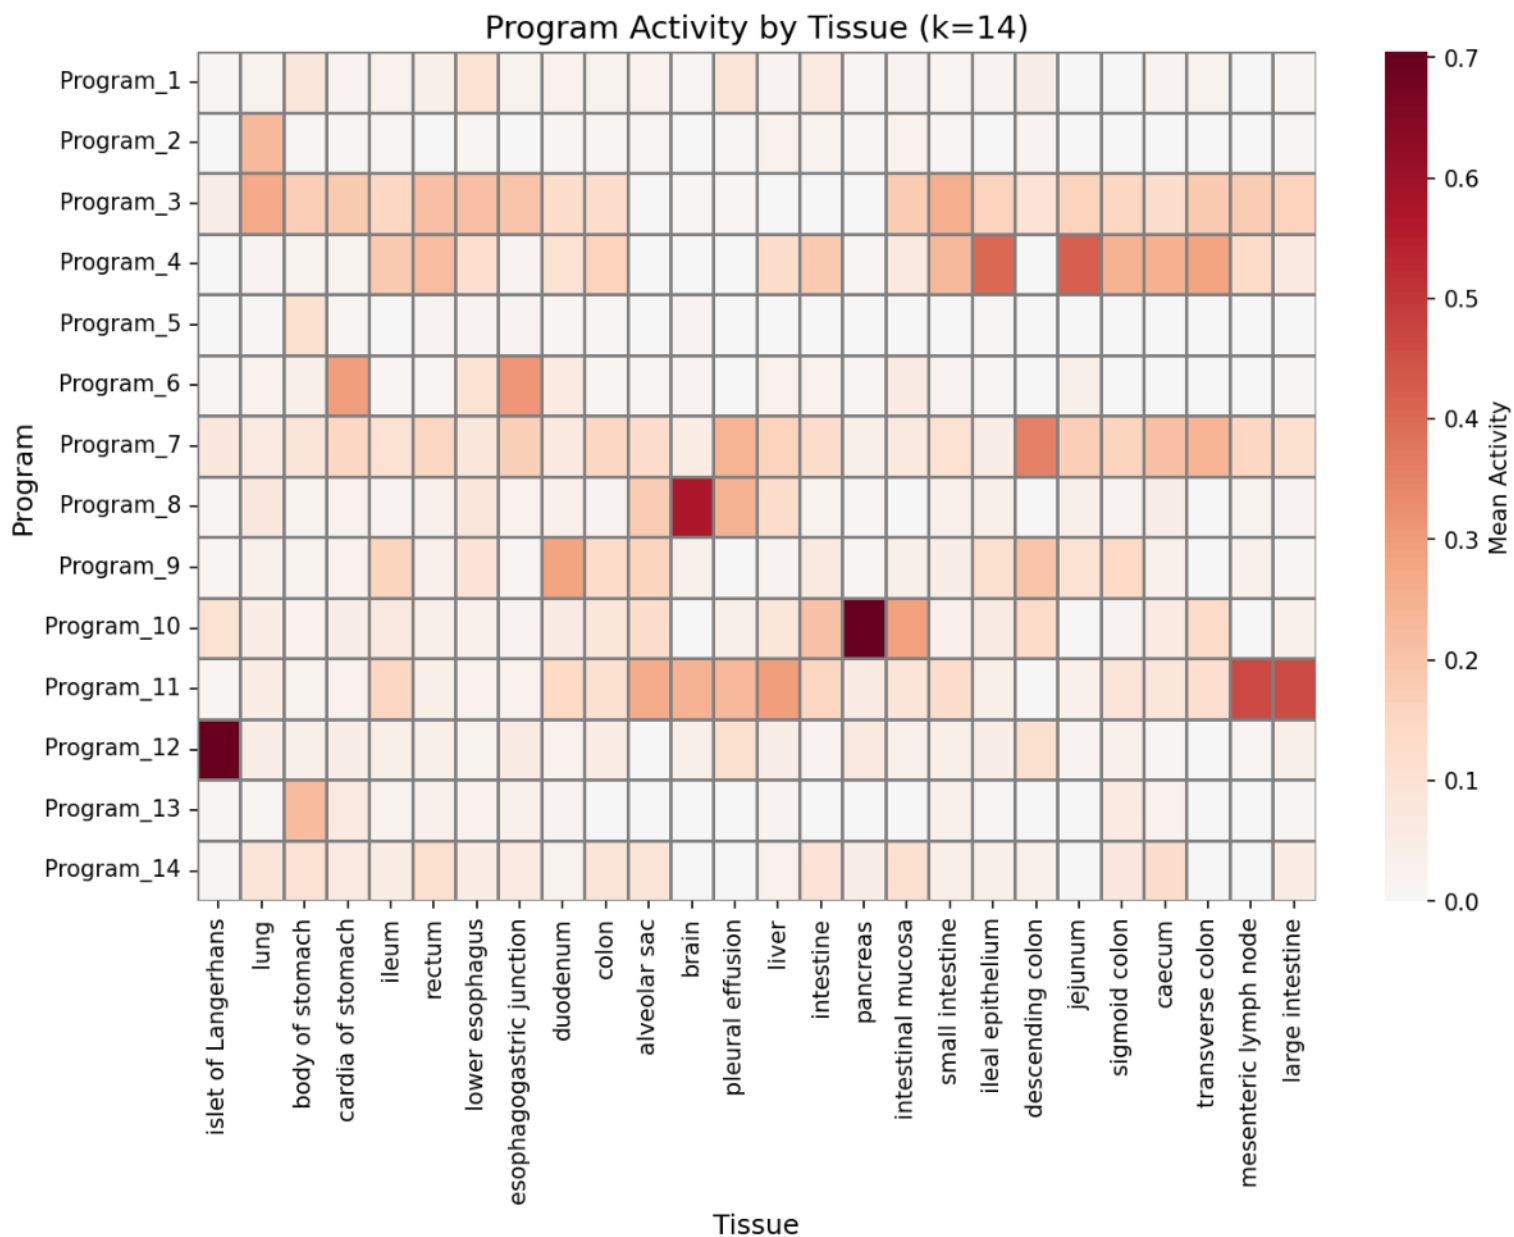

**k = 15**

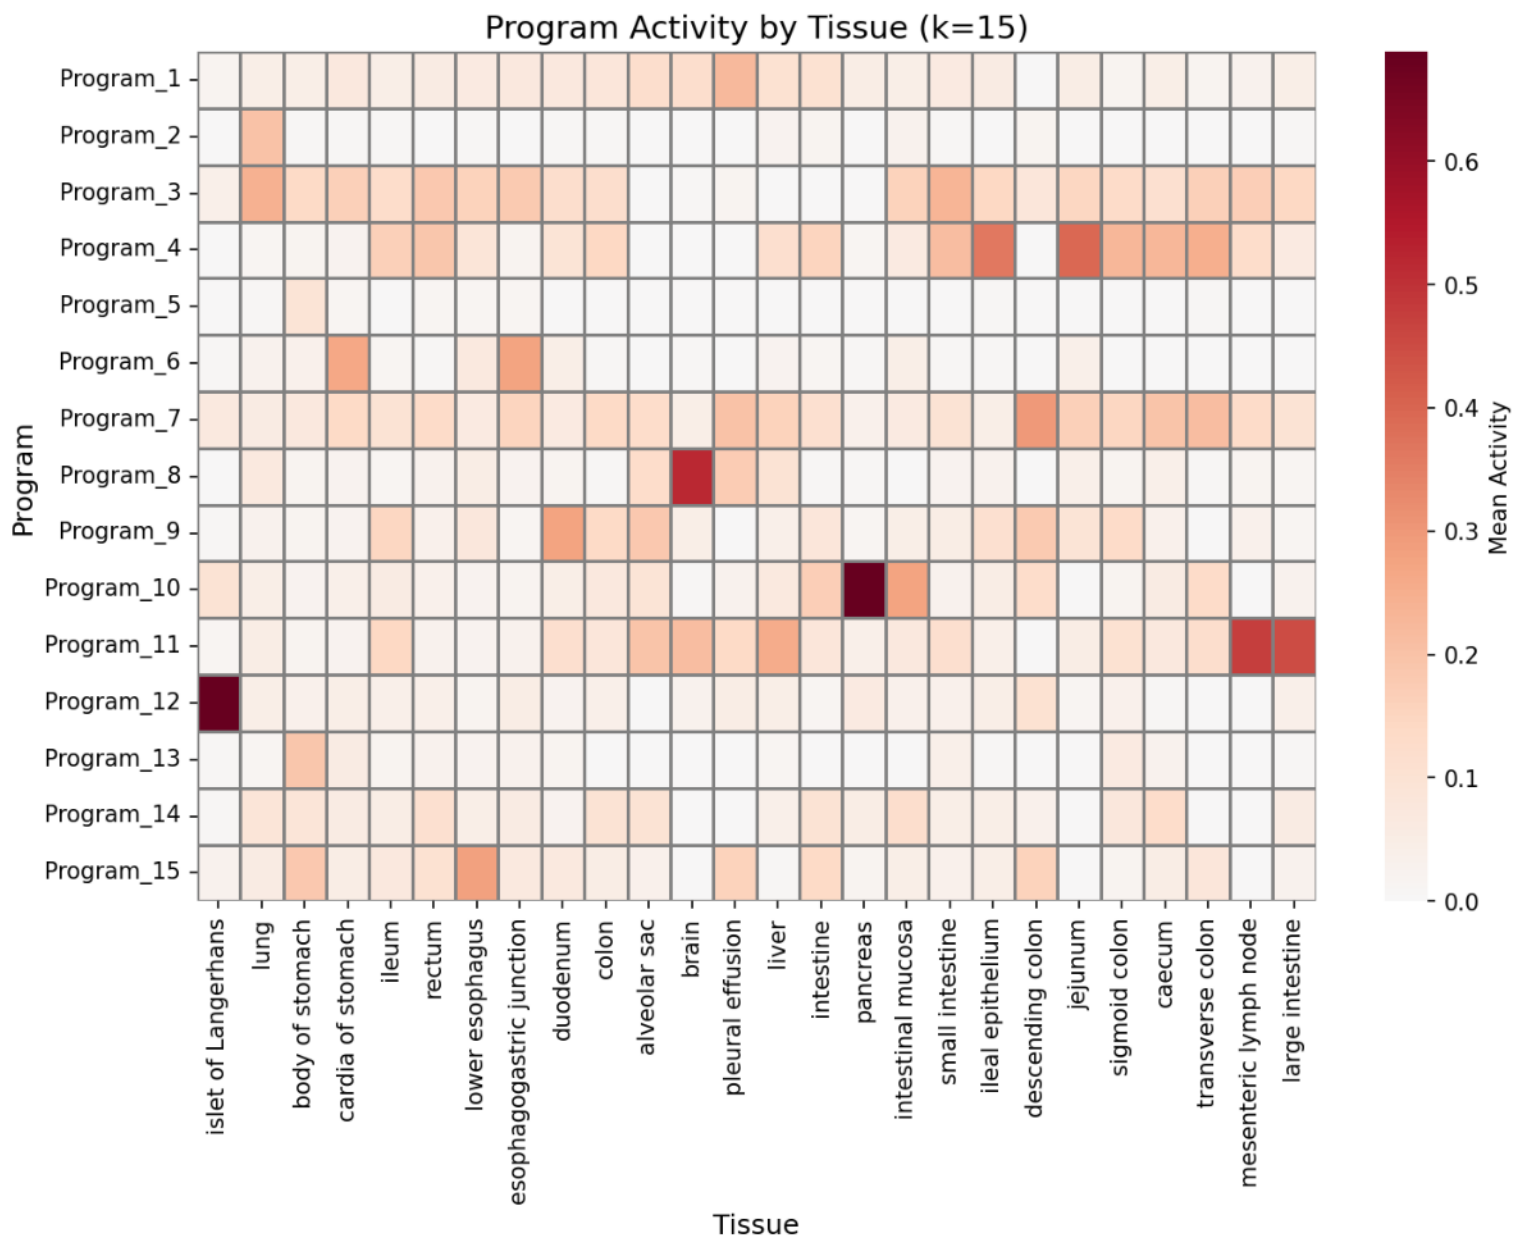

**k = 16**

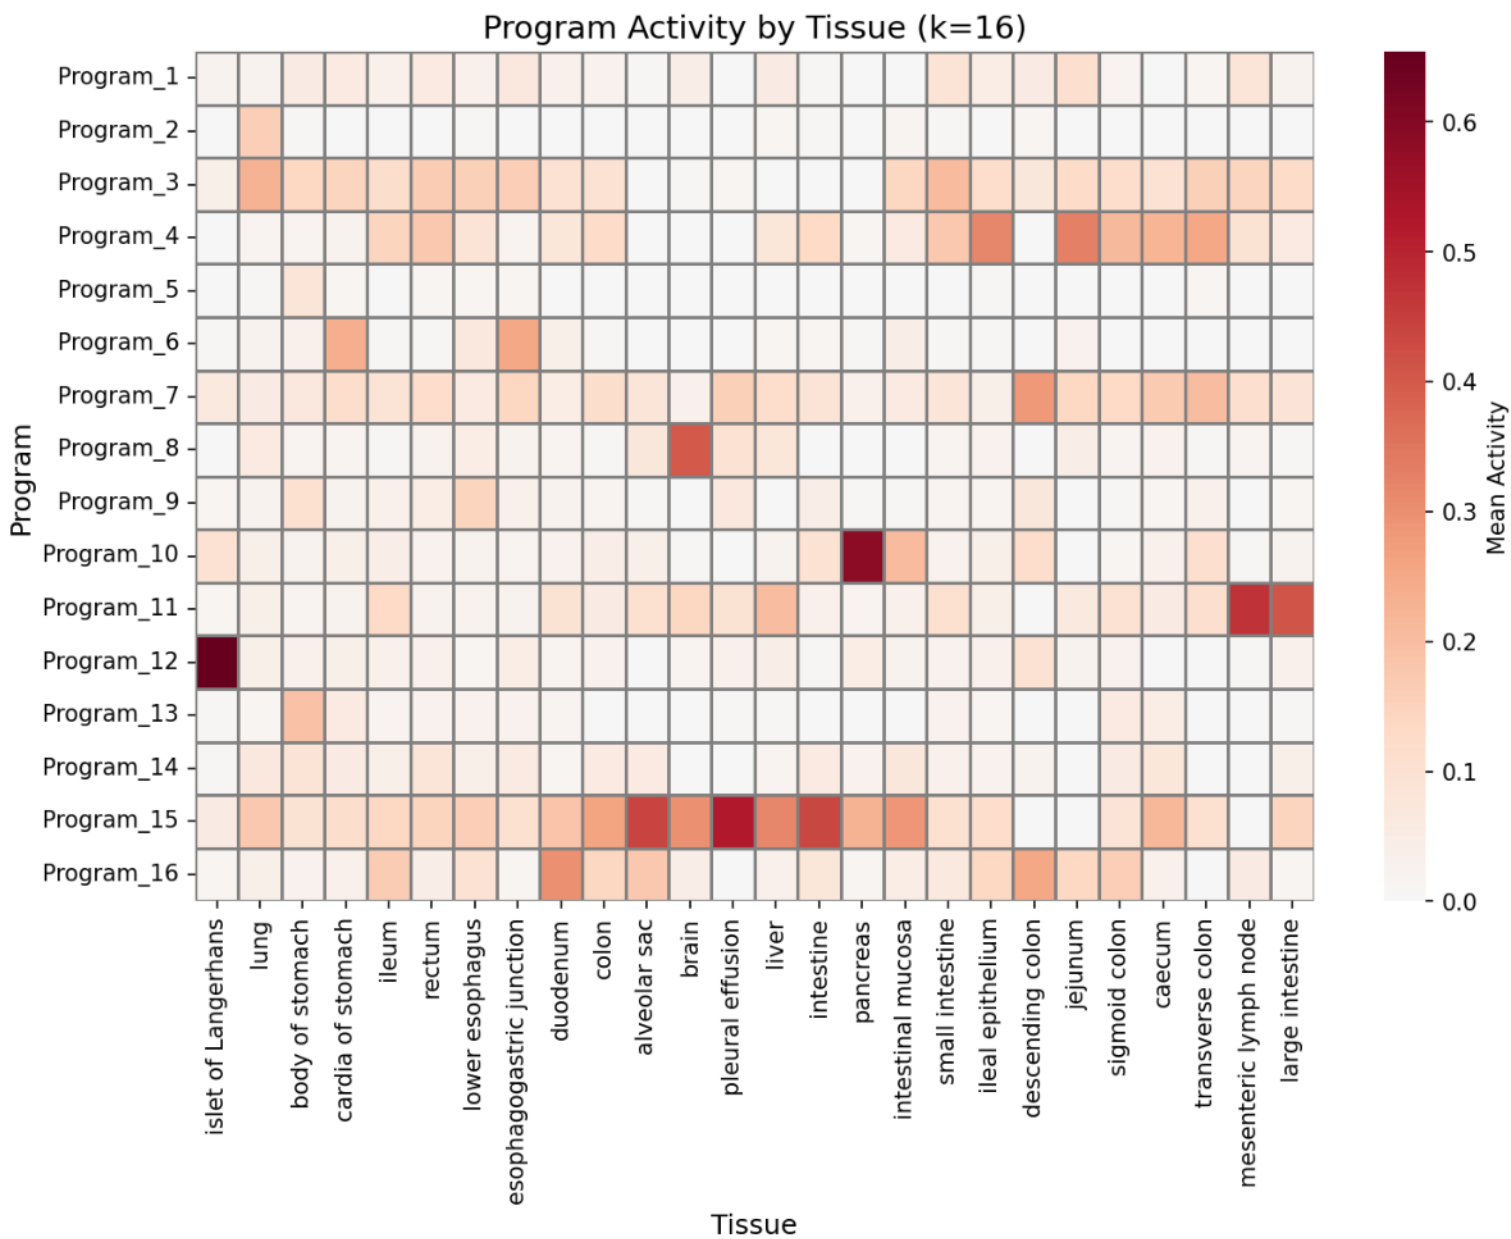



**k = 17**

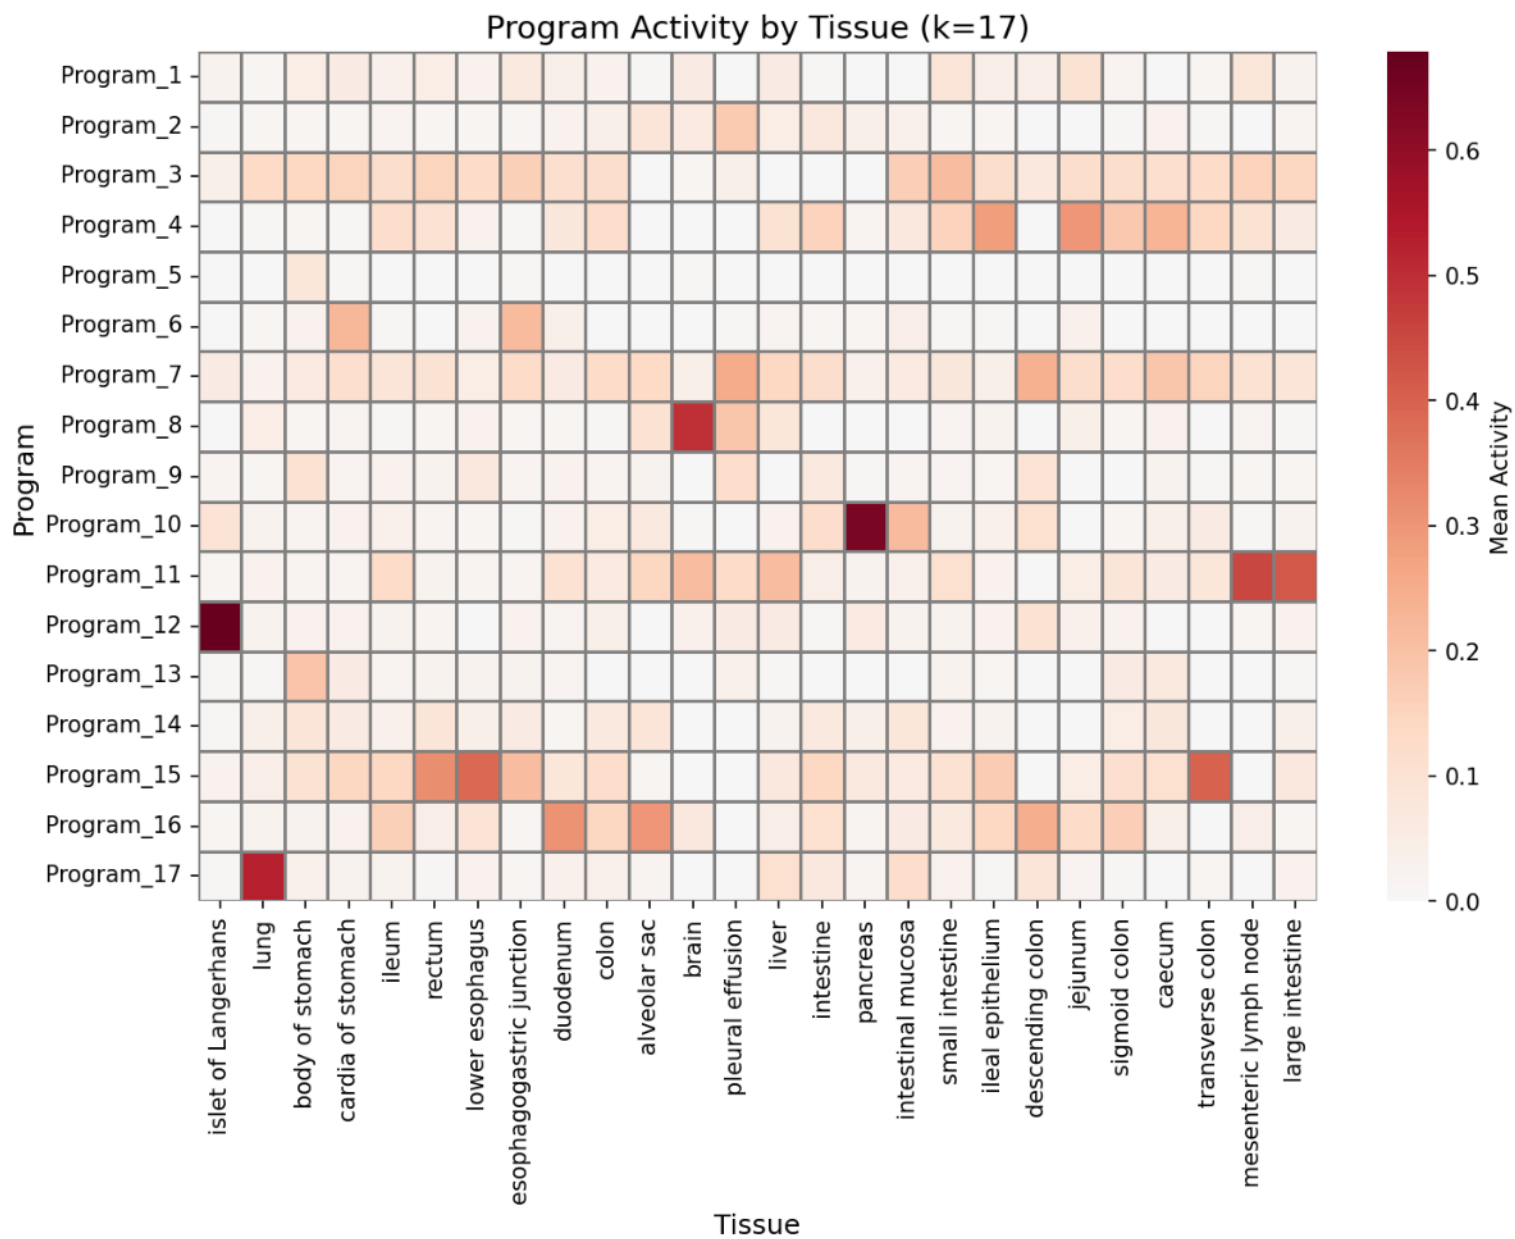

**k = 18**

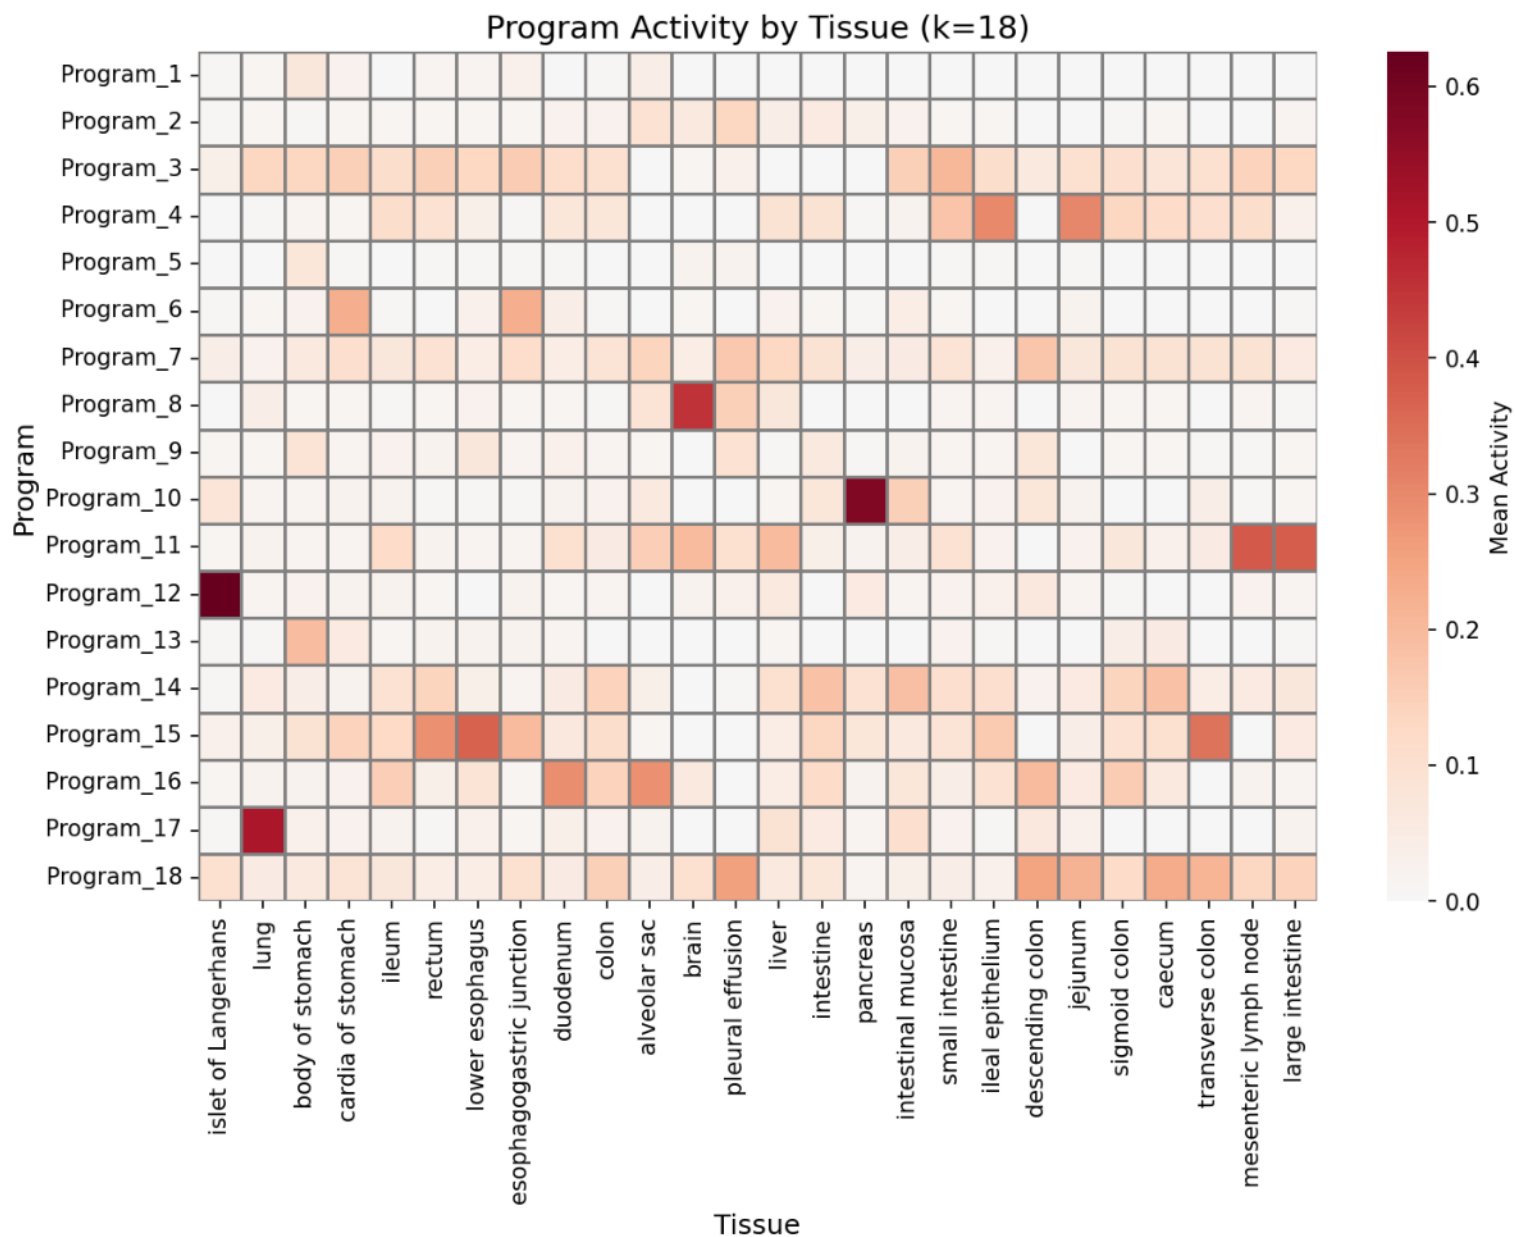

k = 19

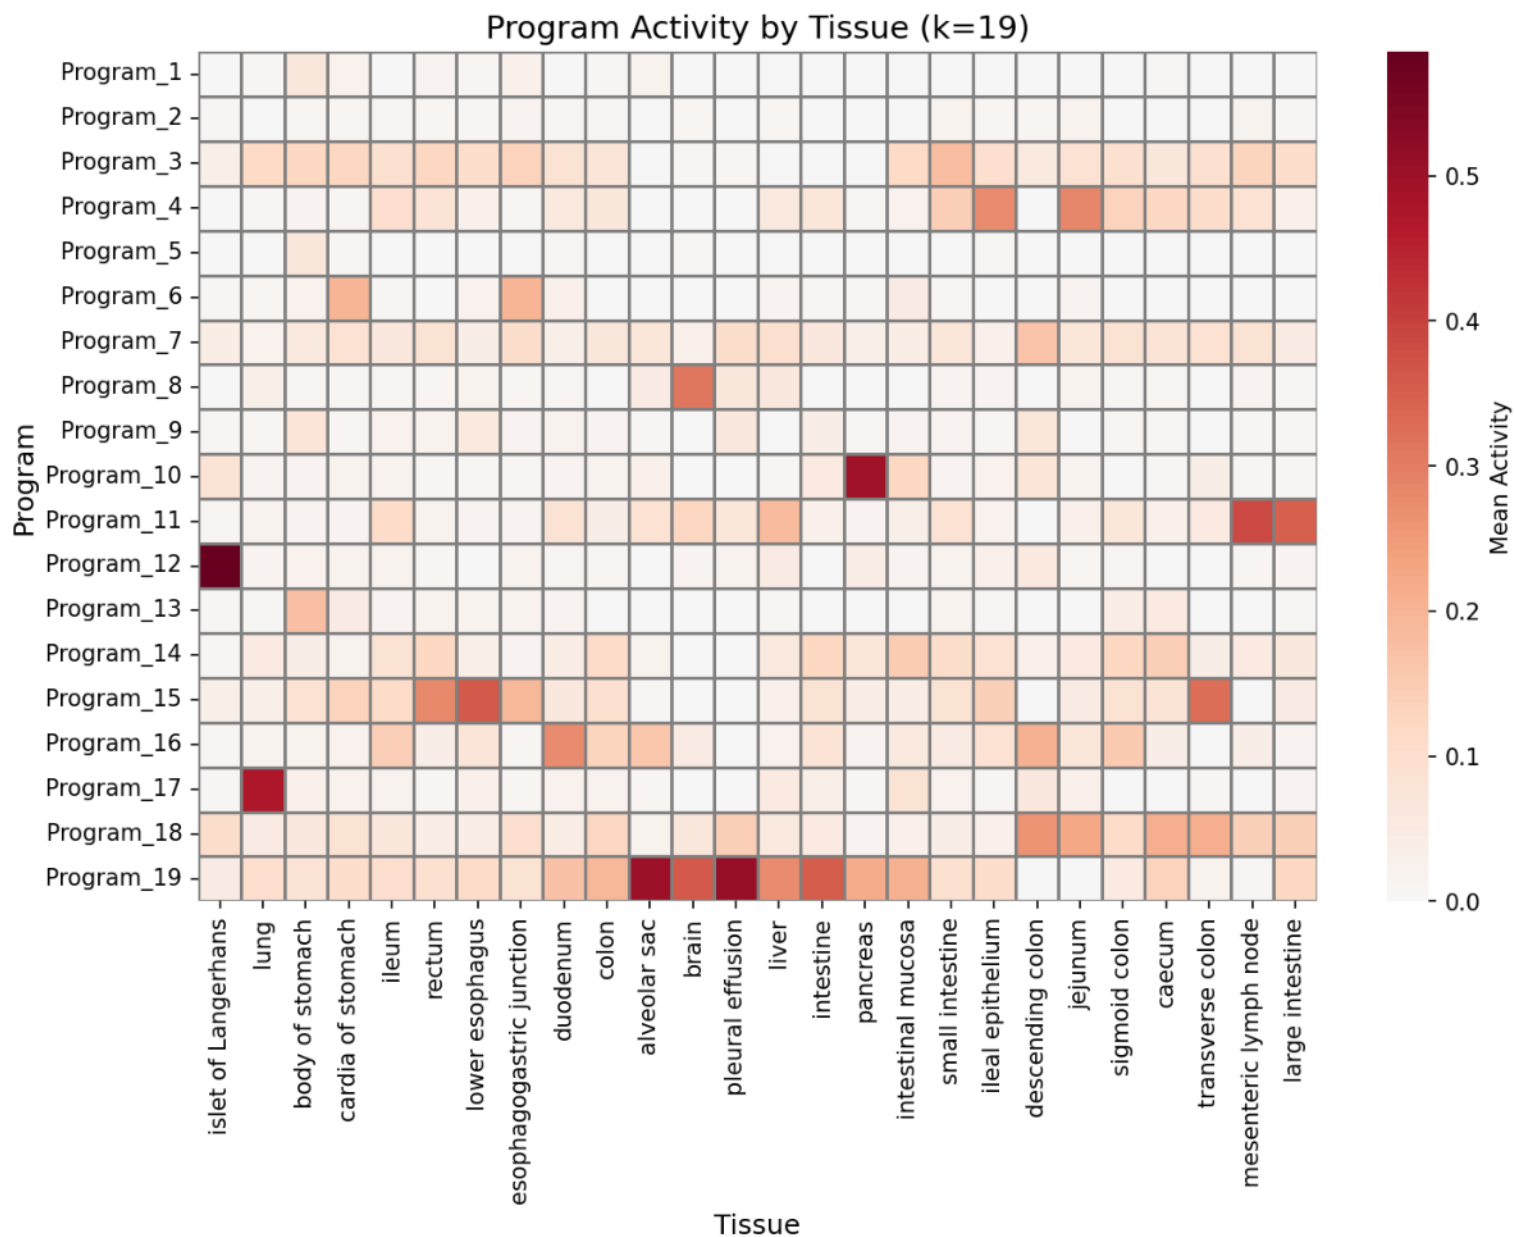

**k = 20**

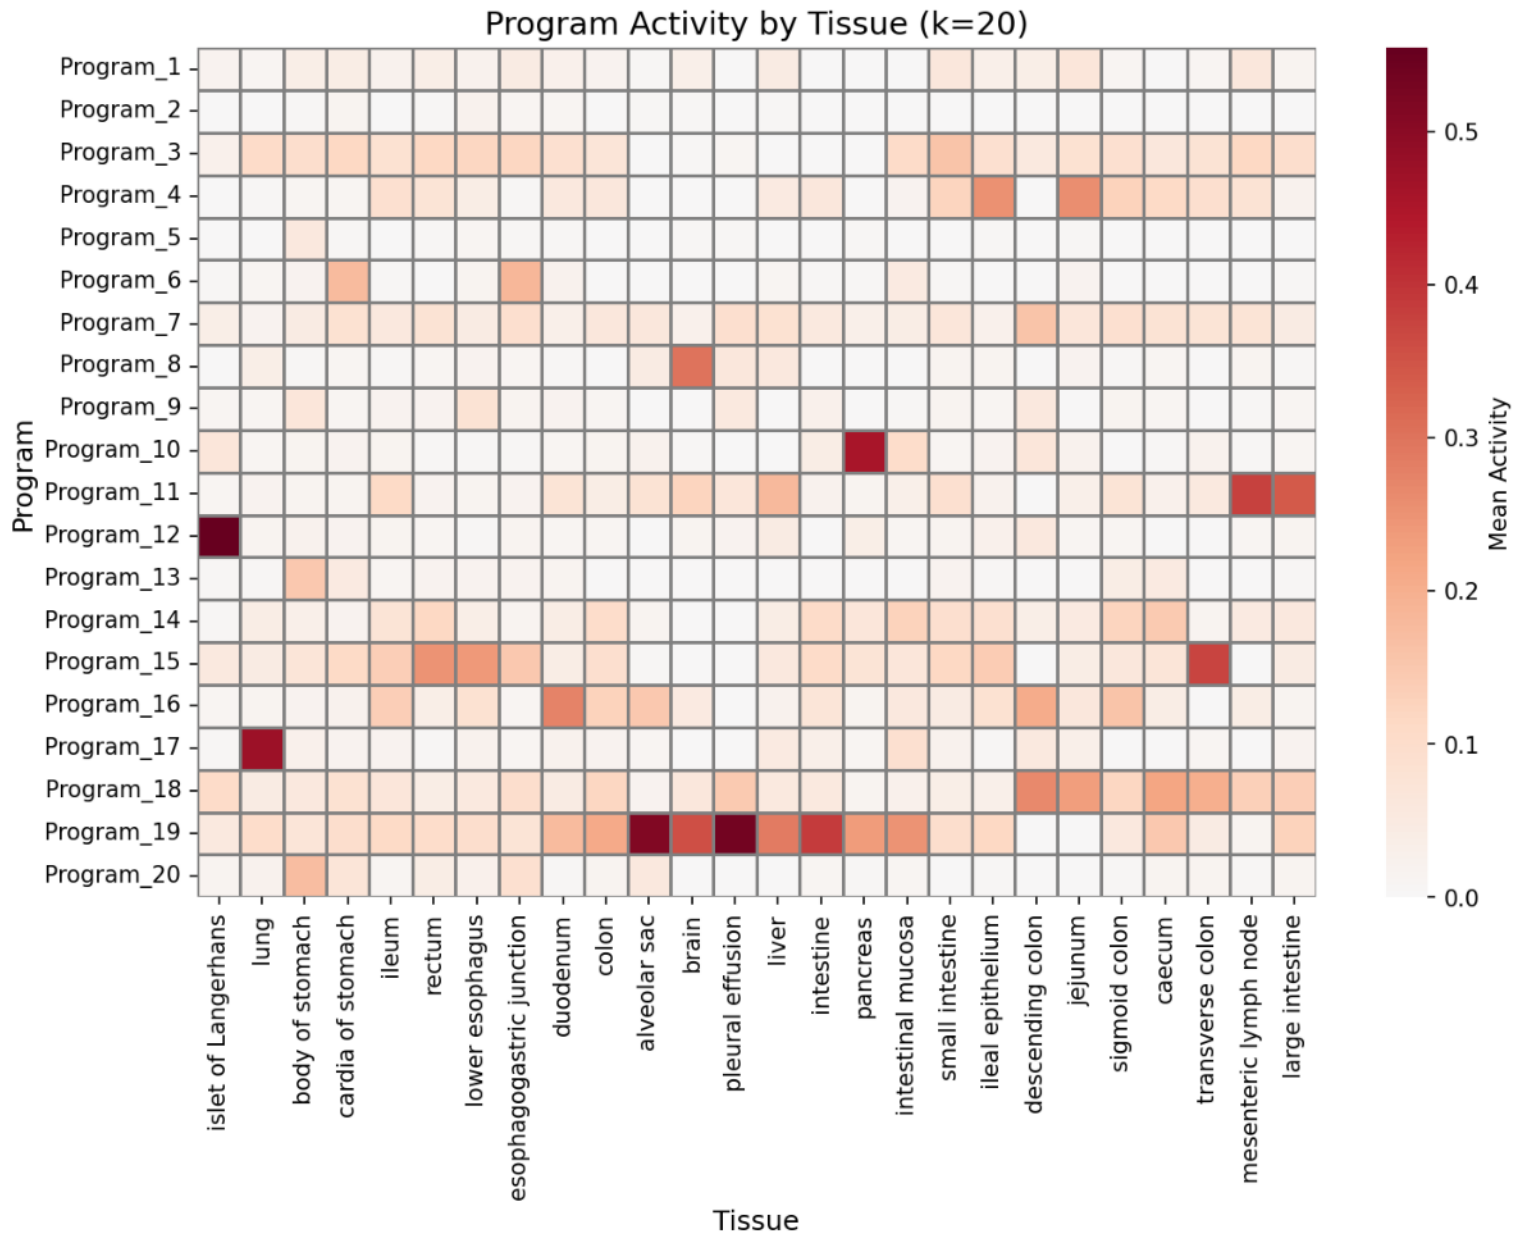

k = 21

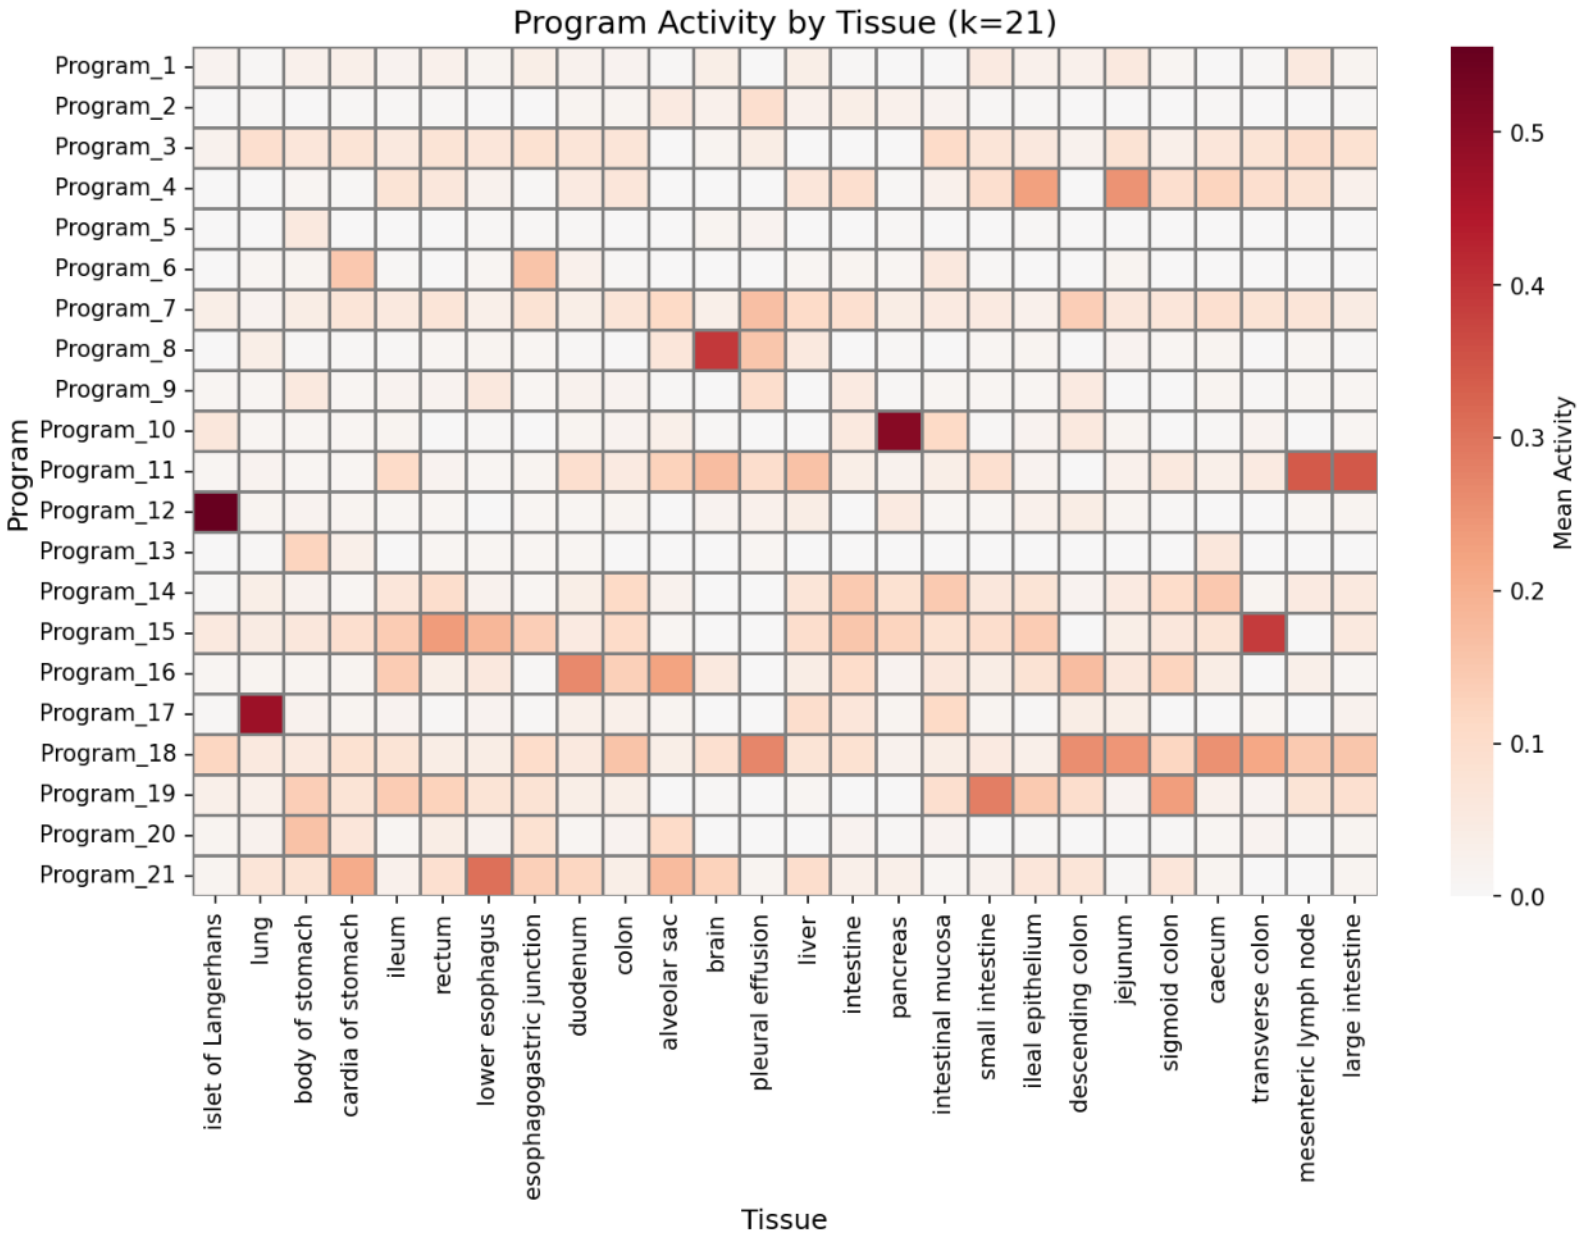

k = 22

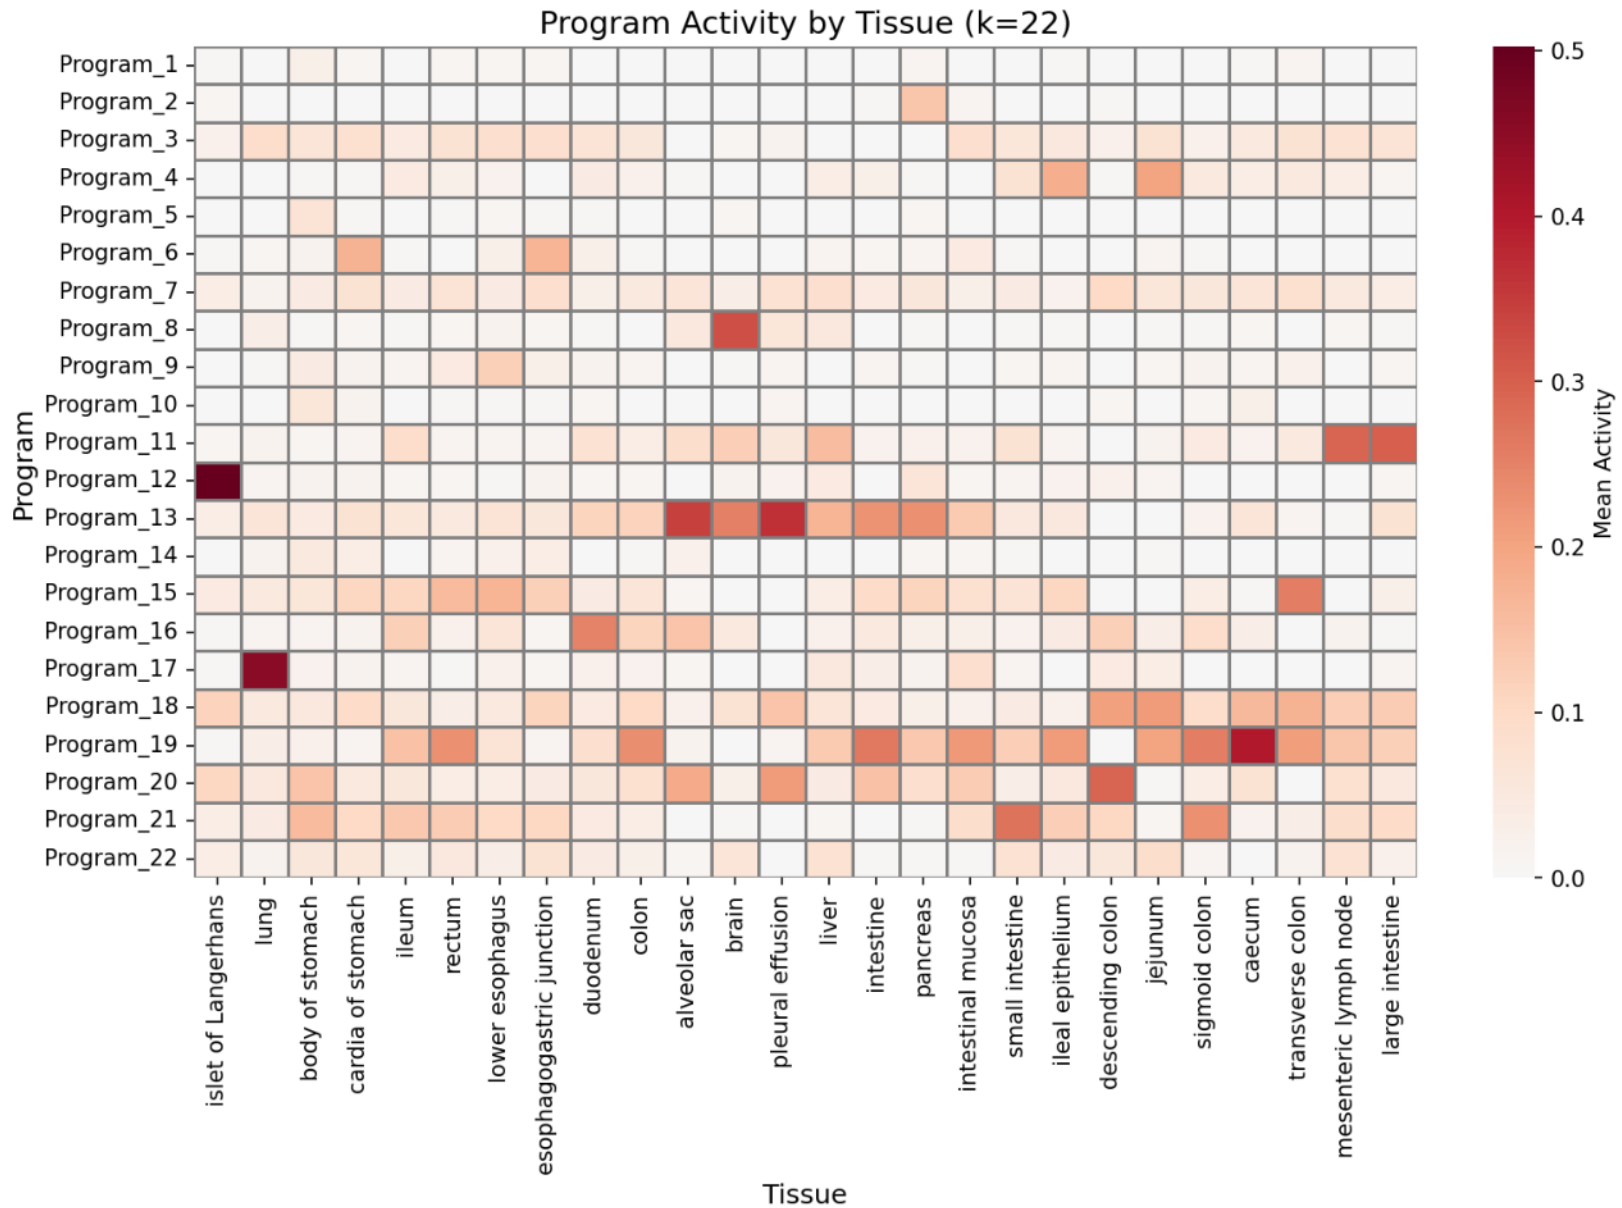

**k = 23**

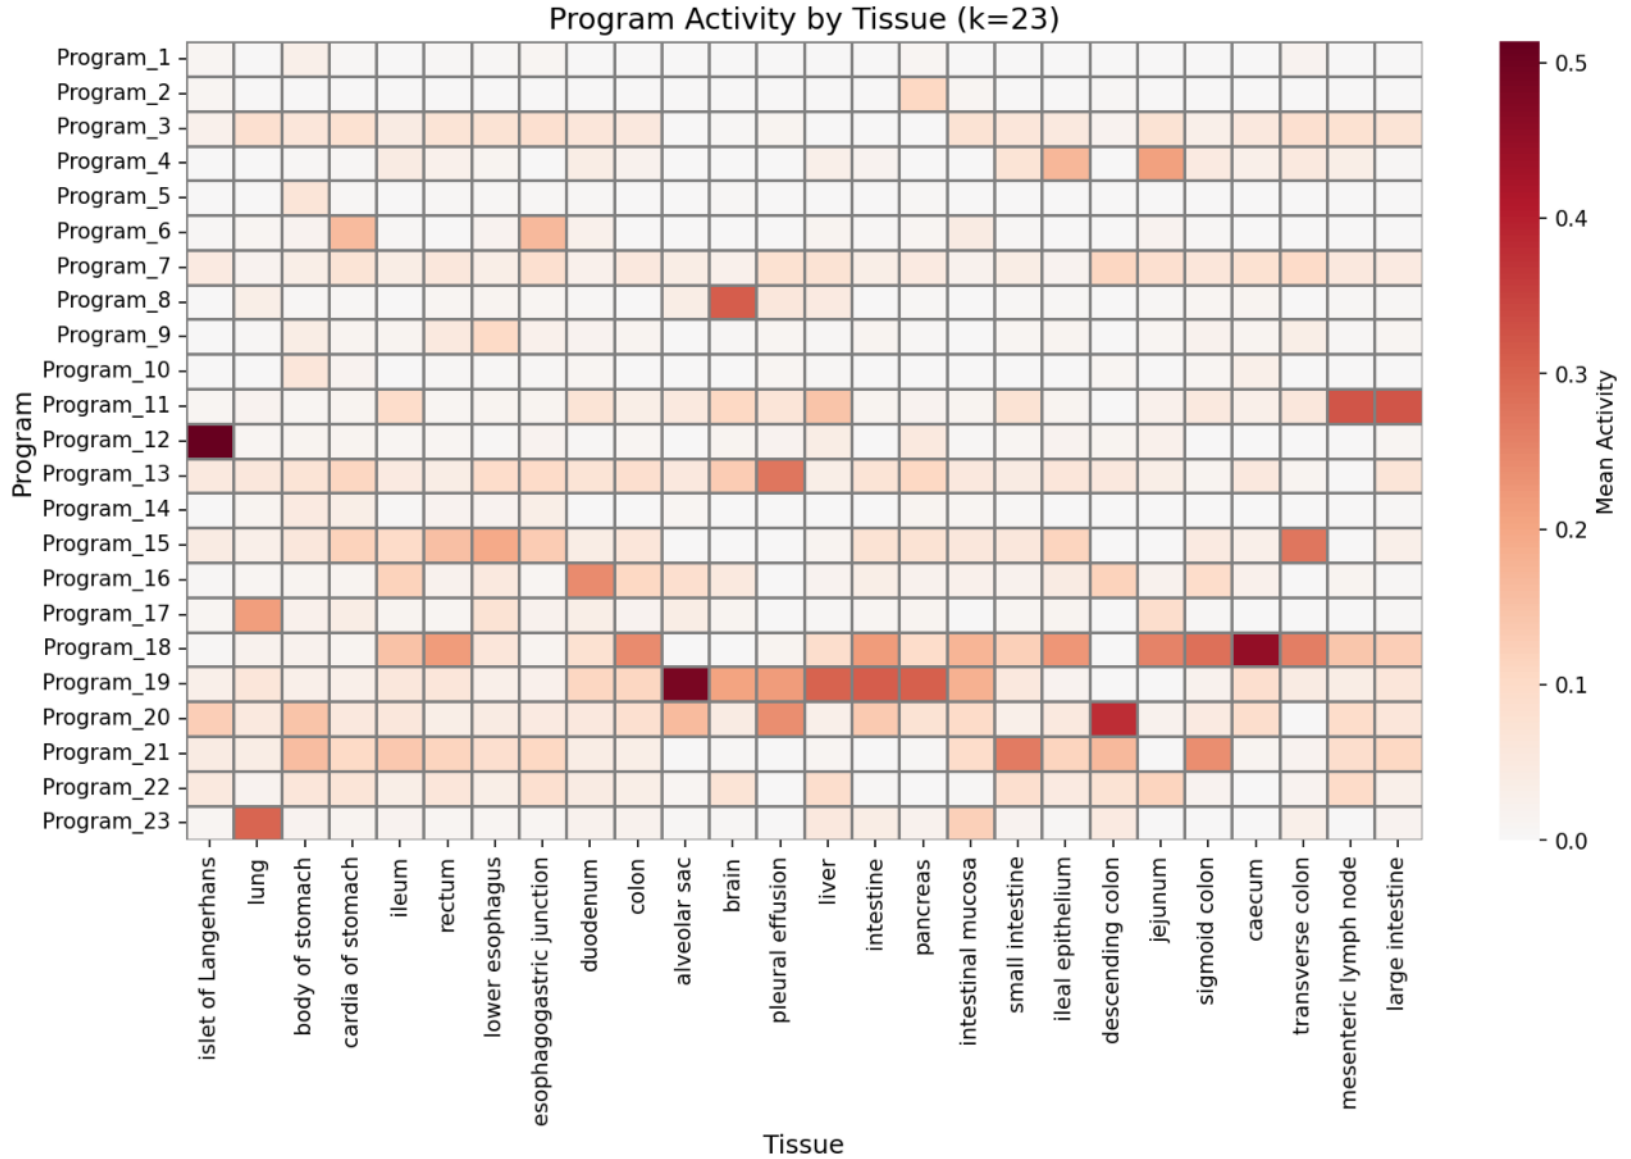

k = 24

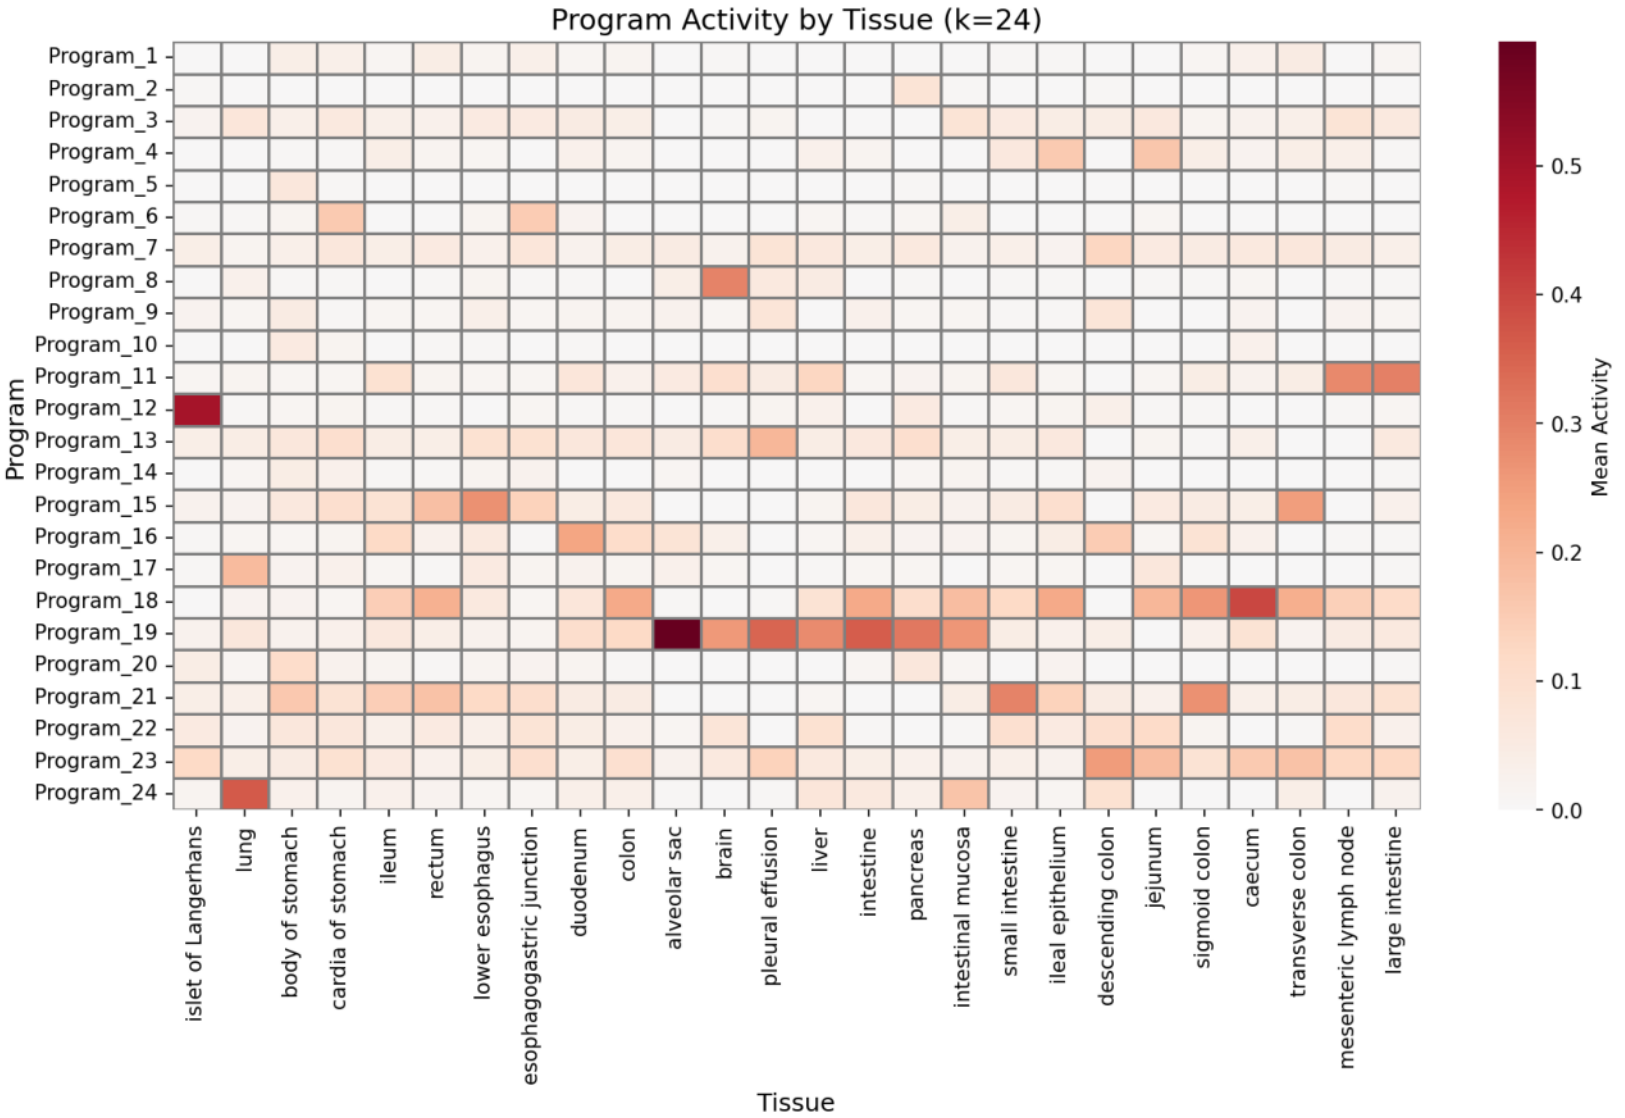



k = 25

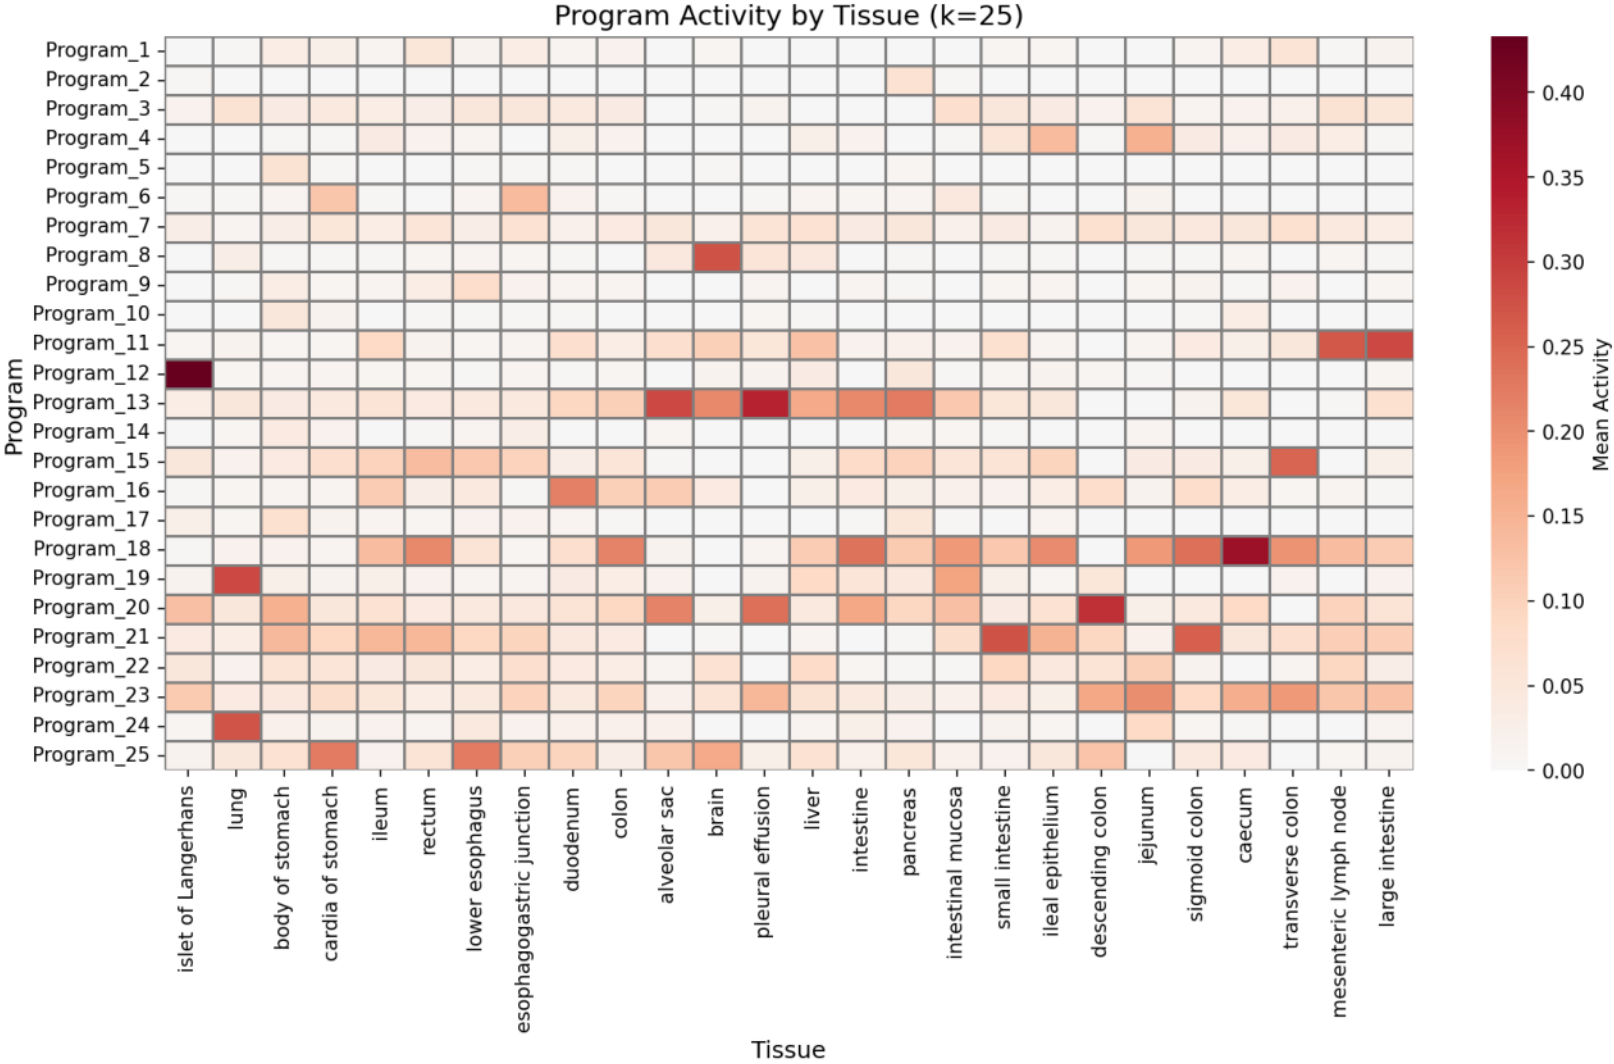

k = 26

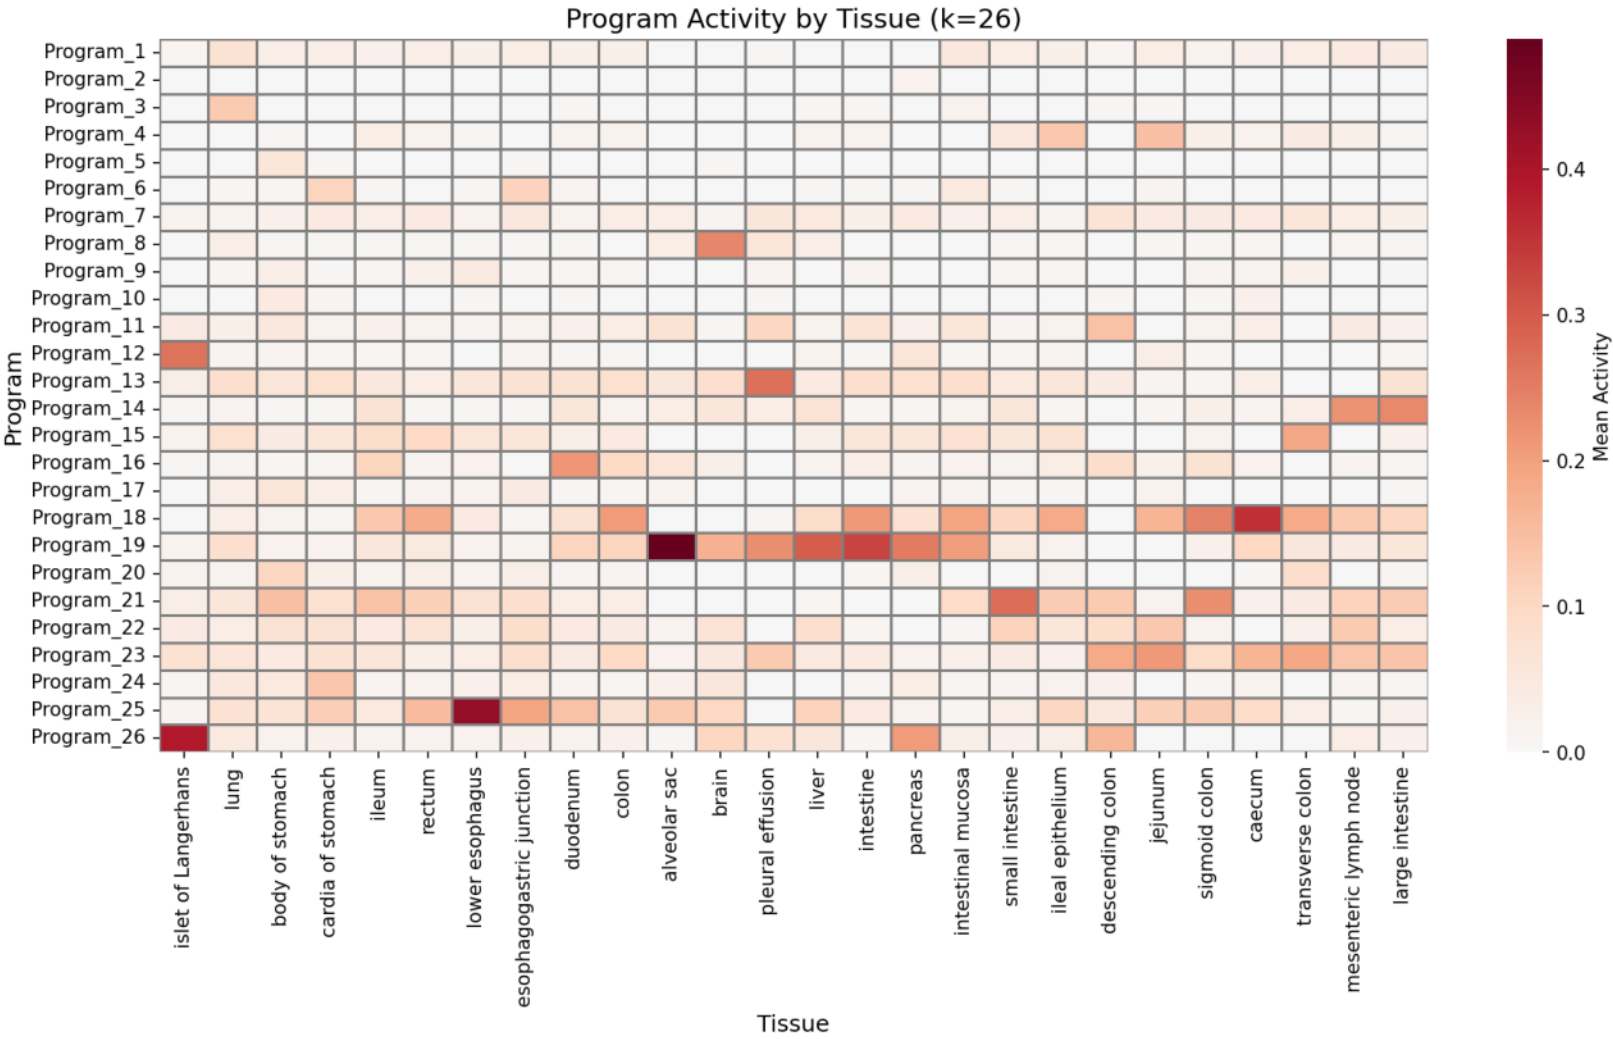

k = 27

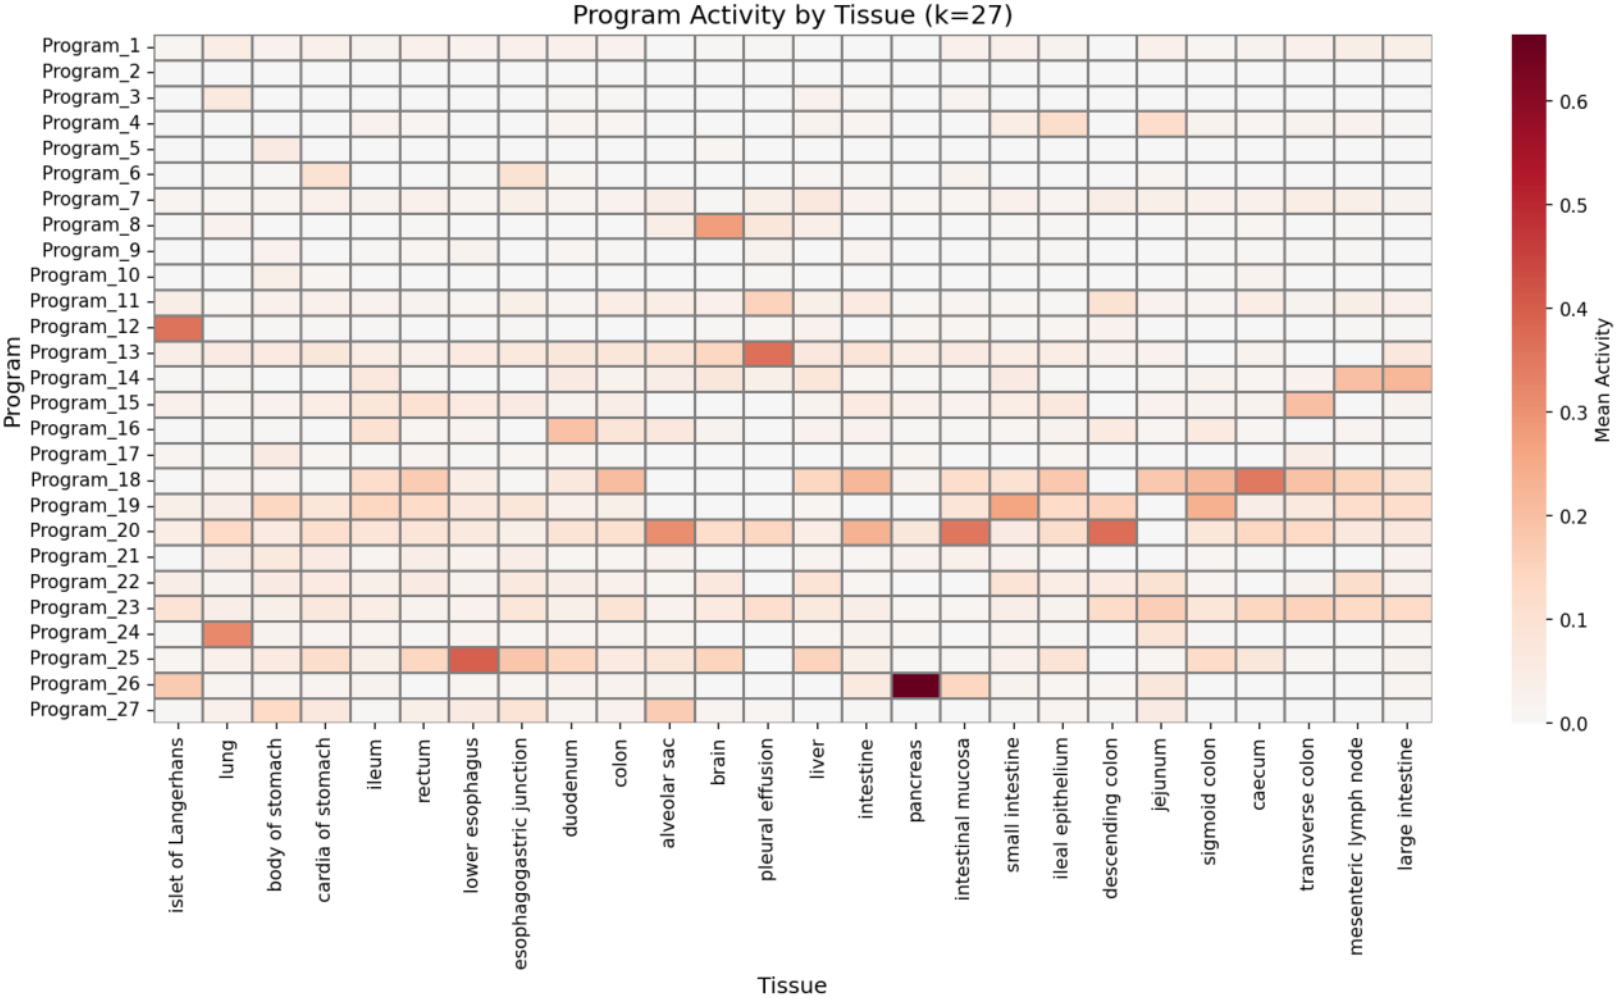

k = 28

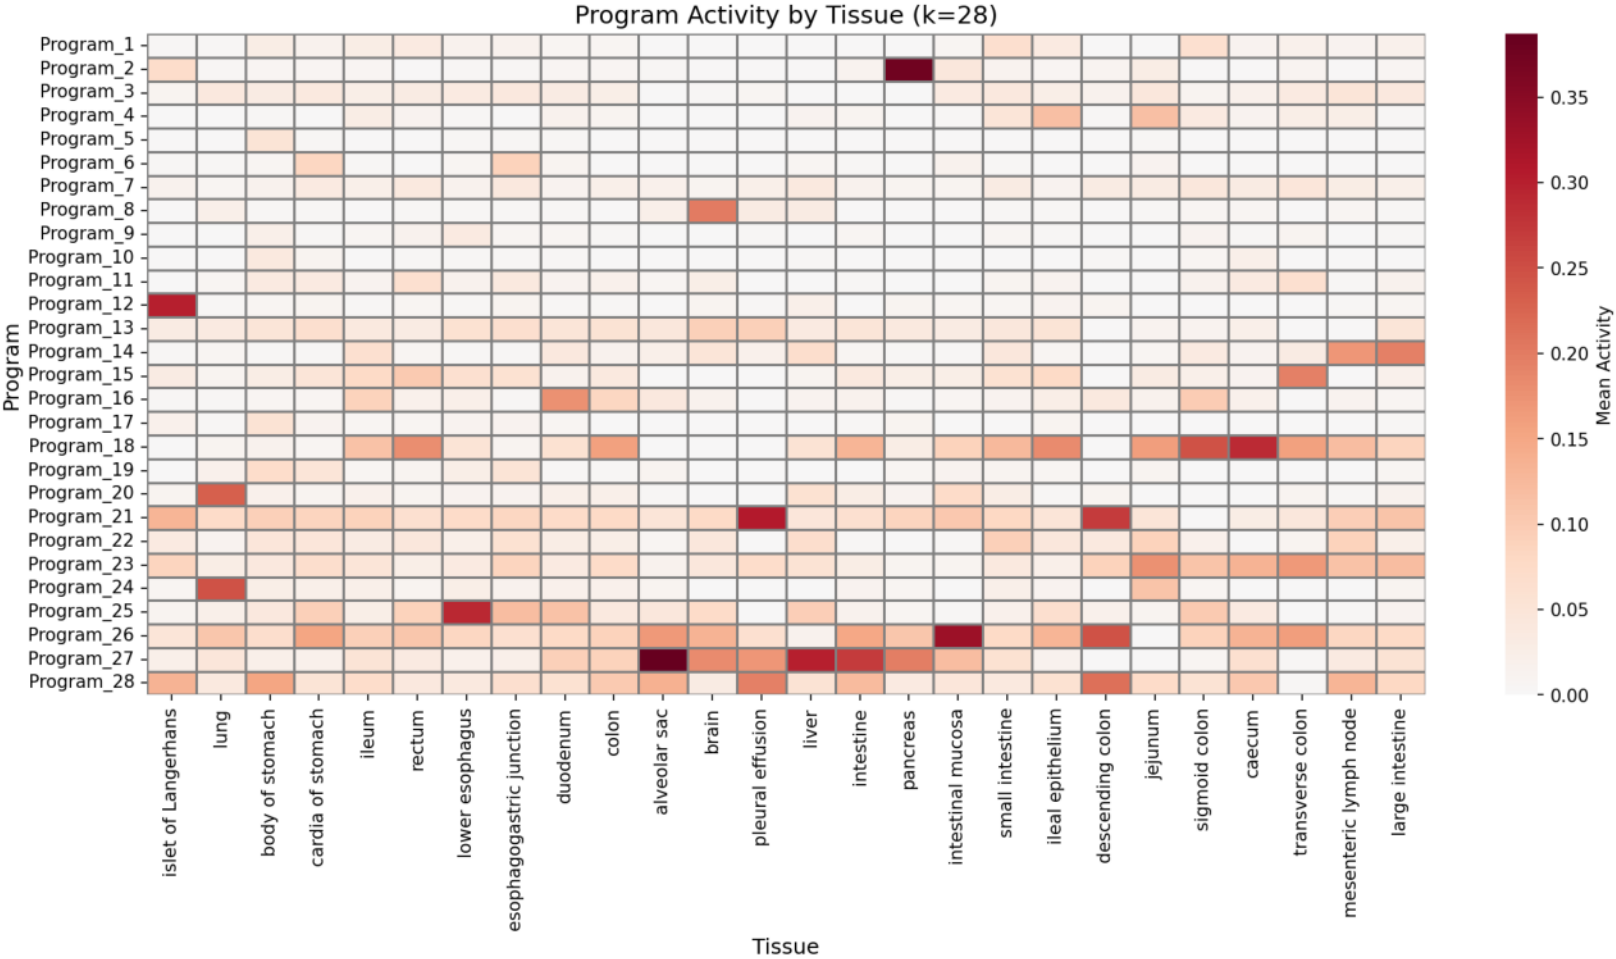

k = 29

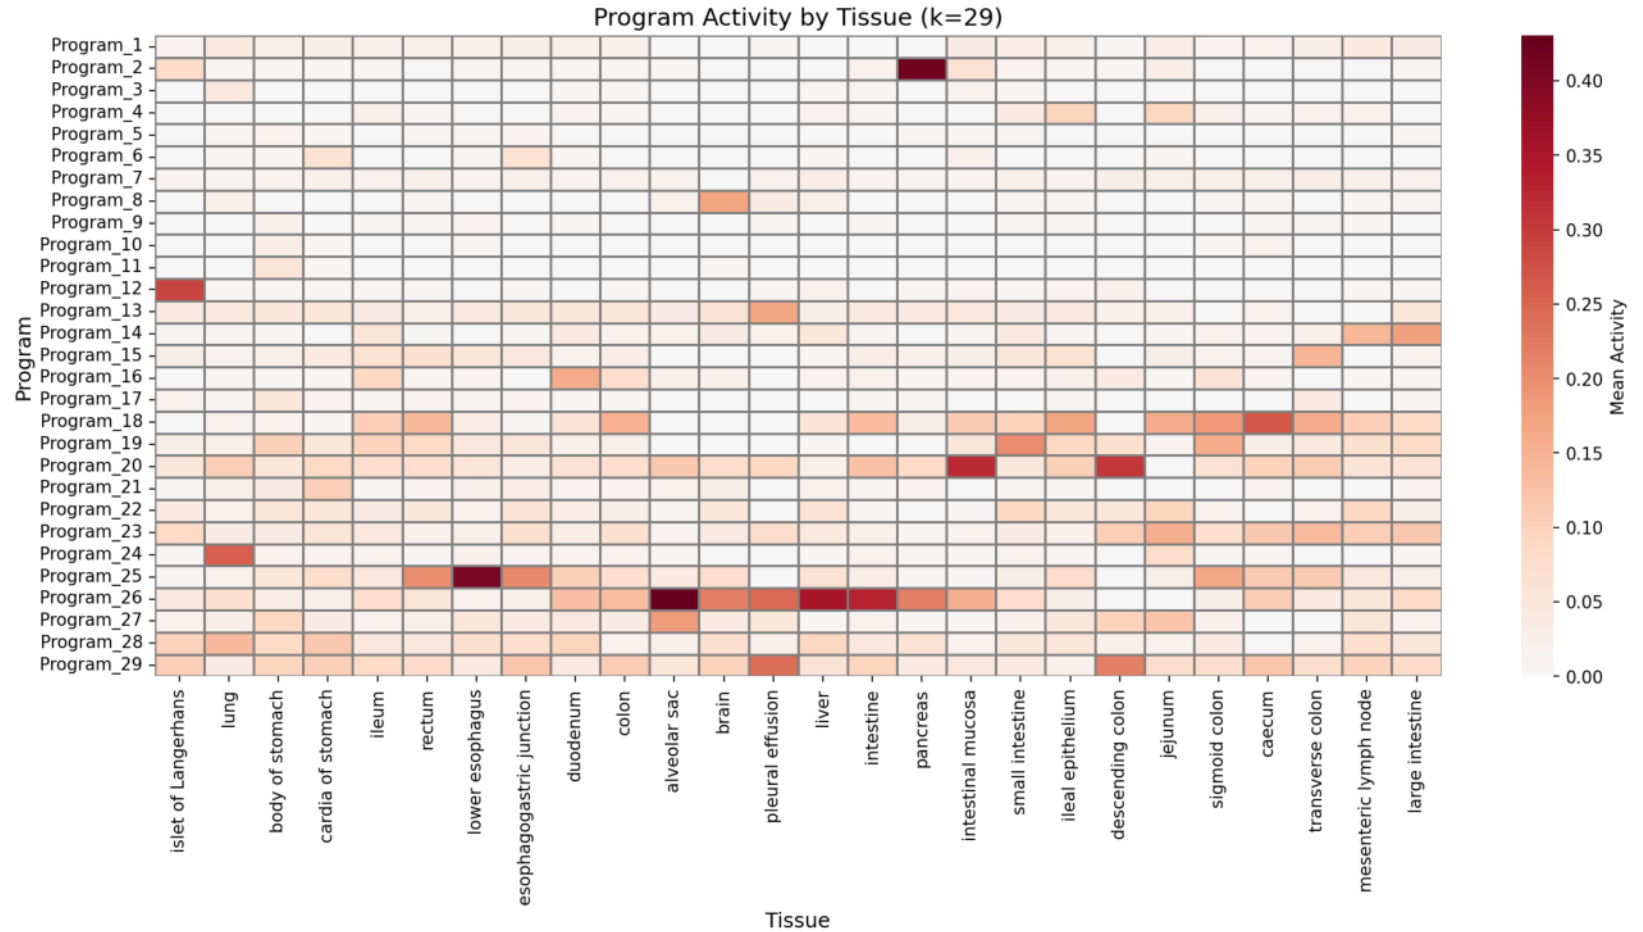

**k = 30**

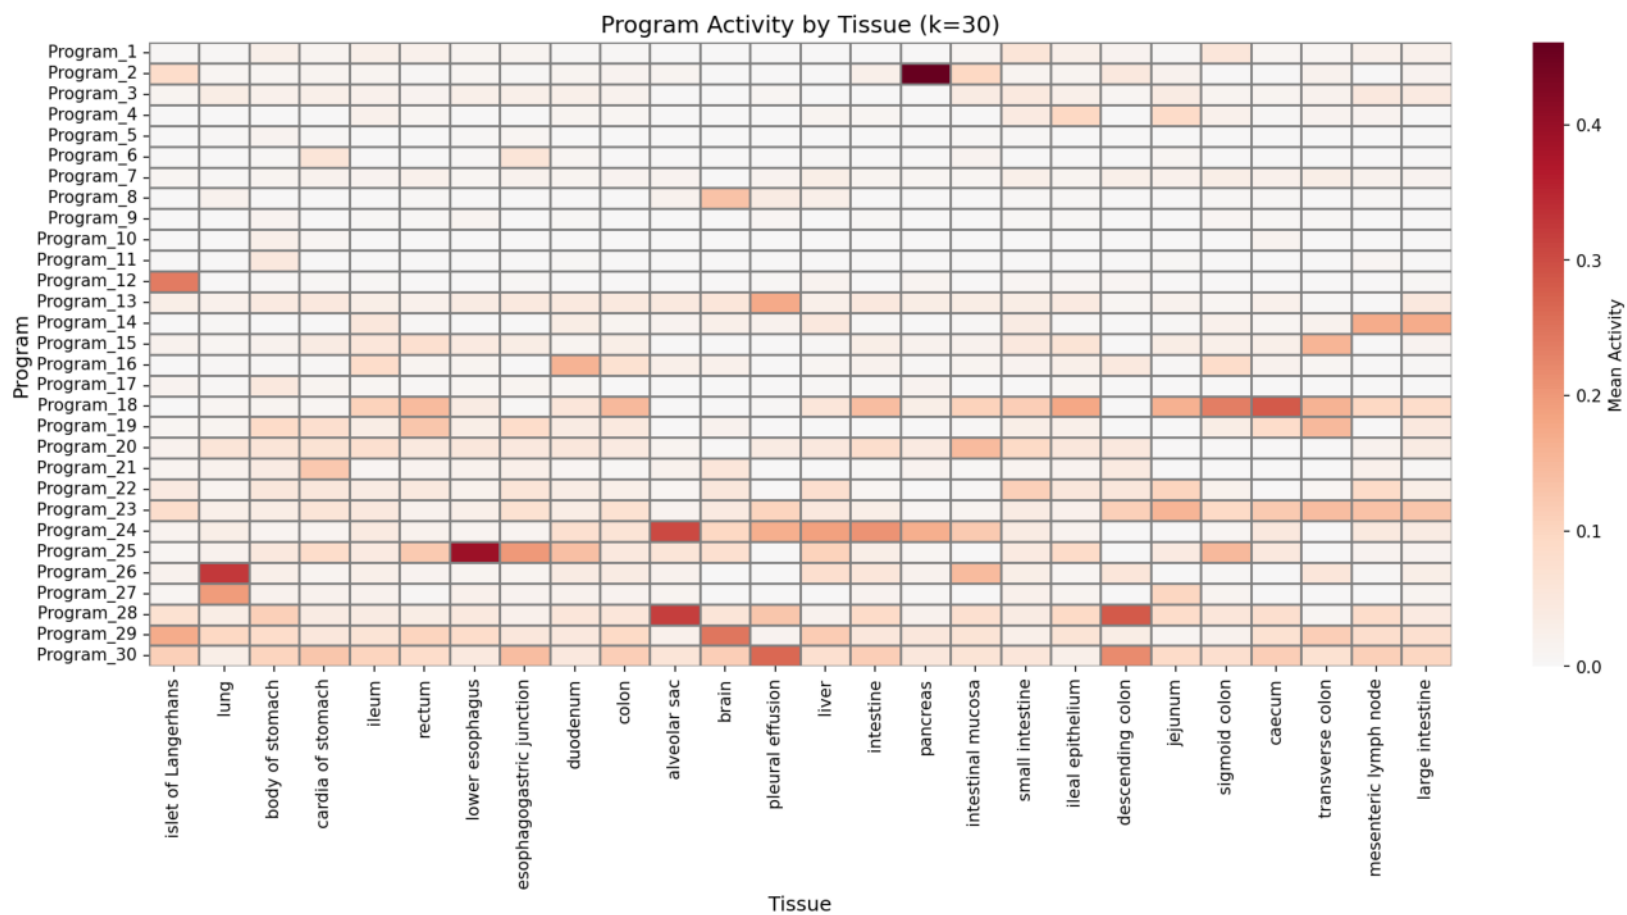

k = 31

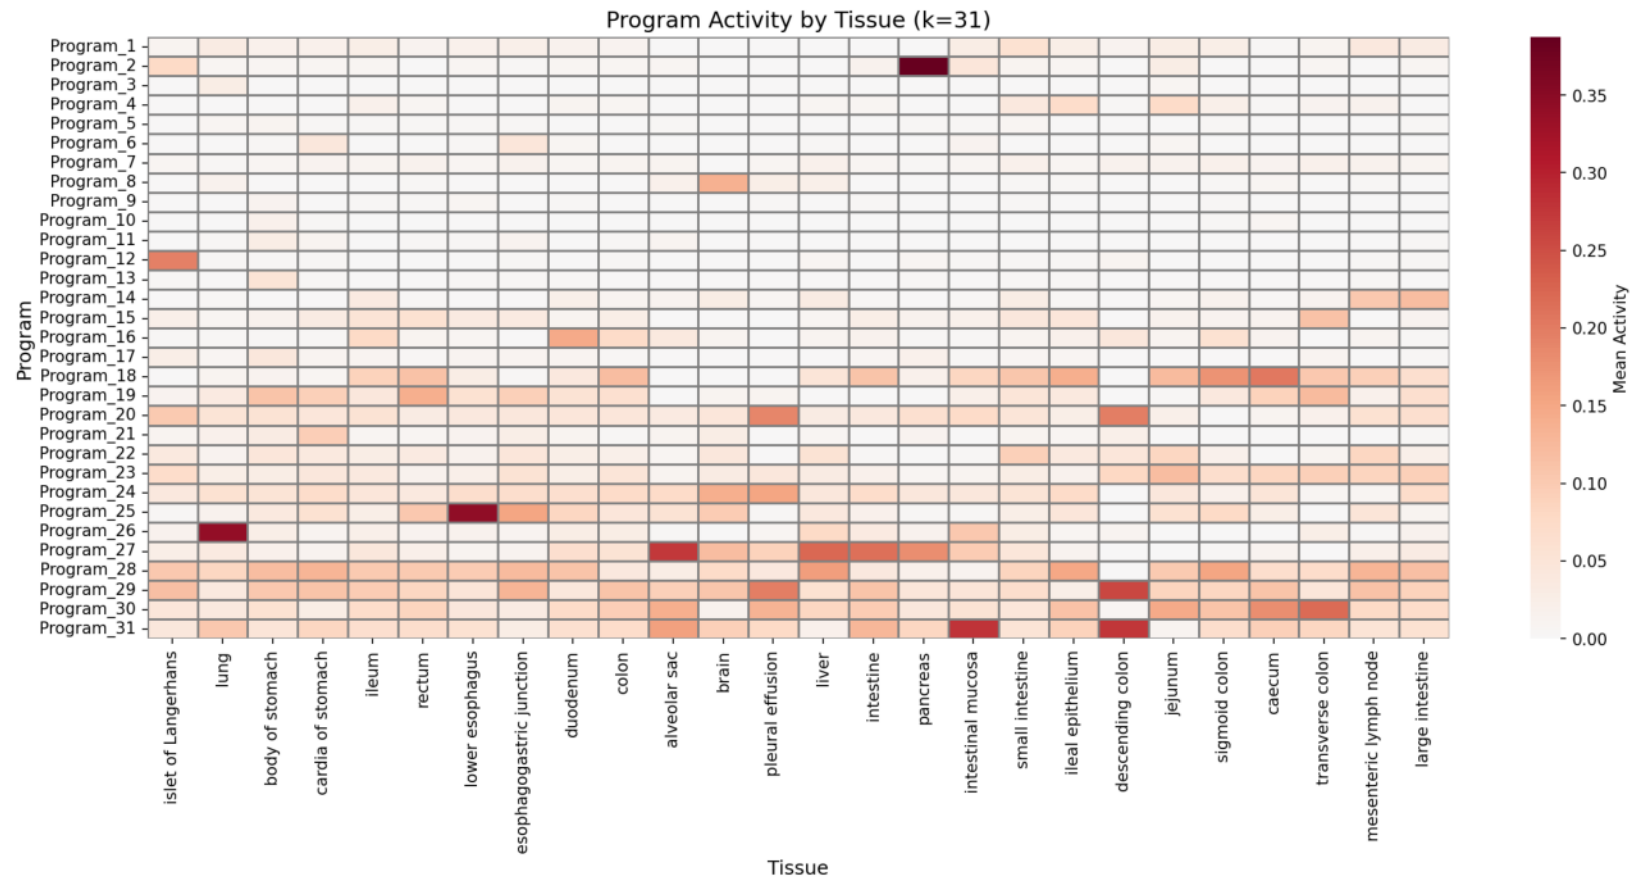

**k = 32**

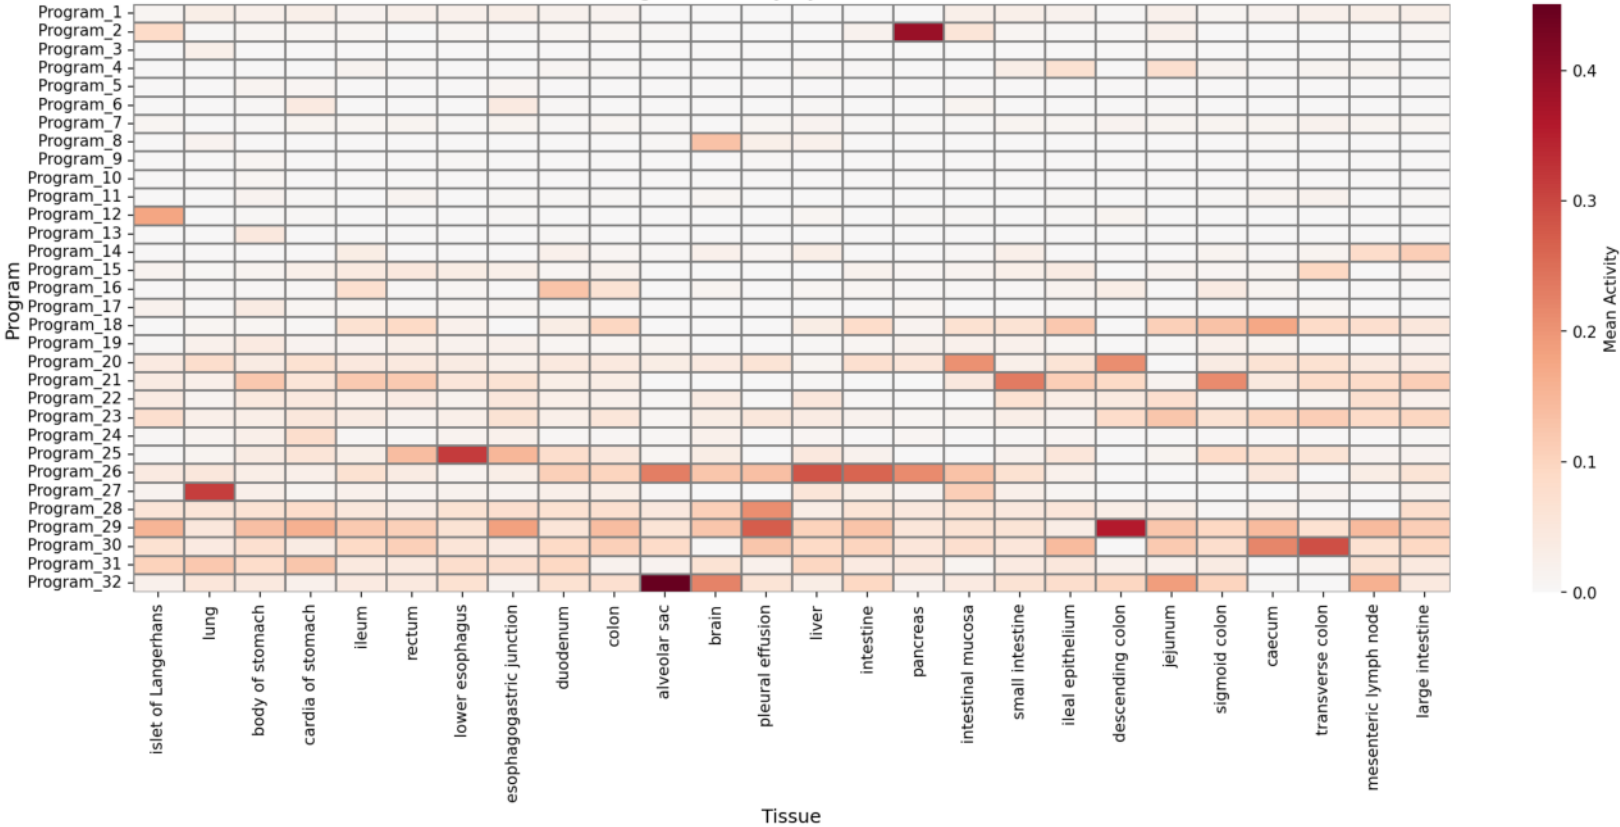



k = 33

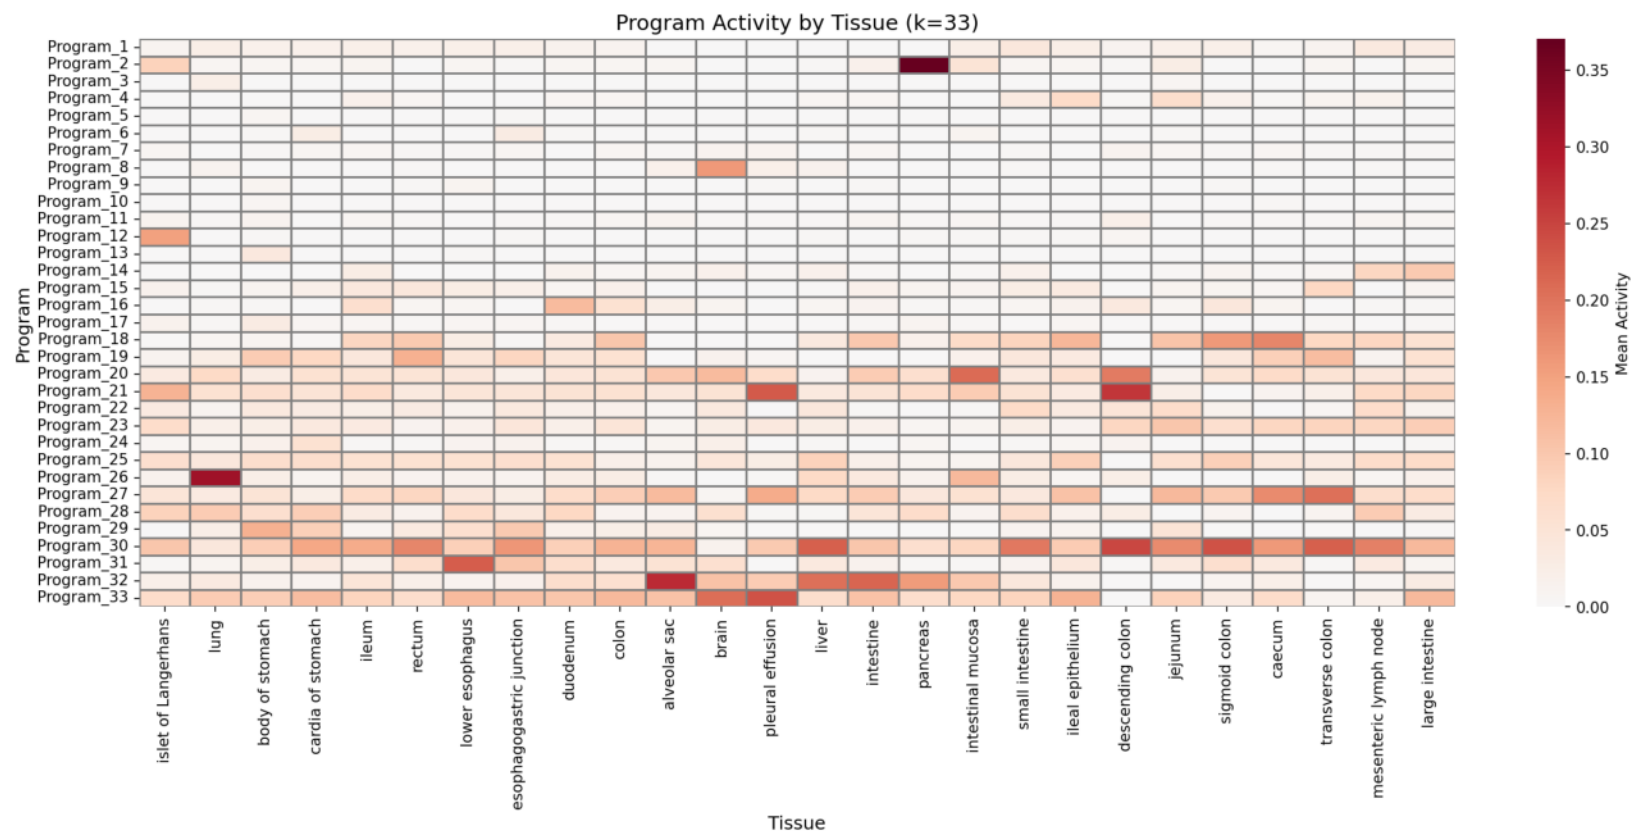

k = 34

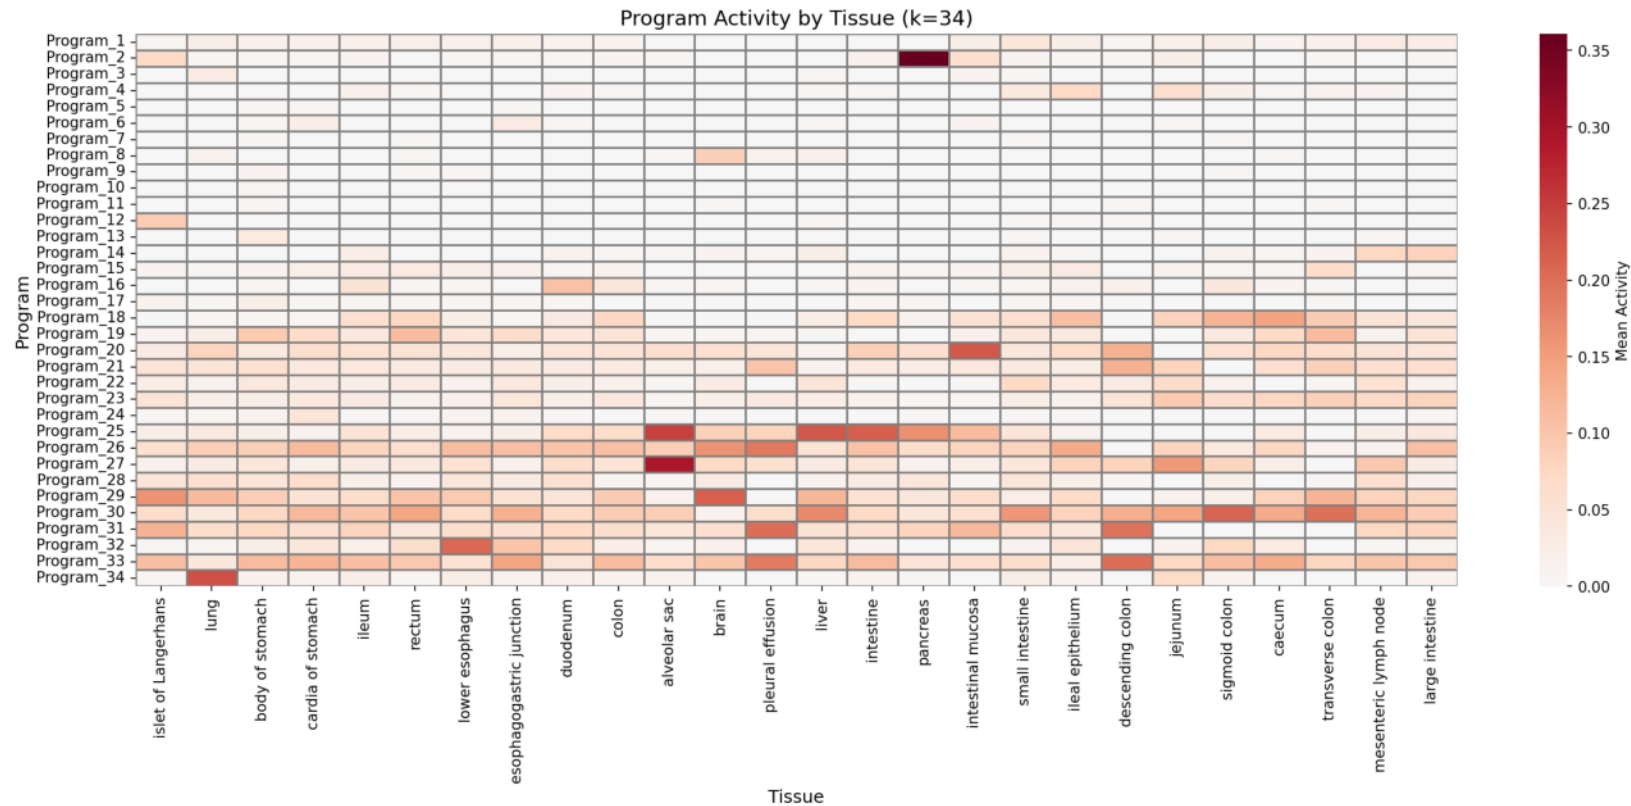

**k = 35**

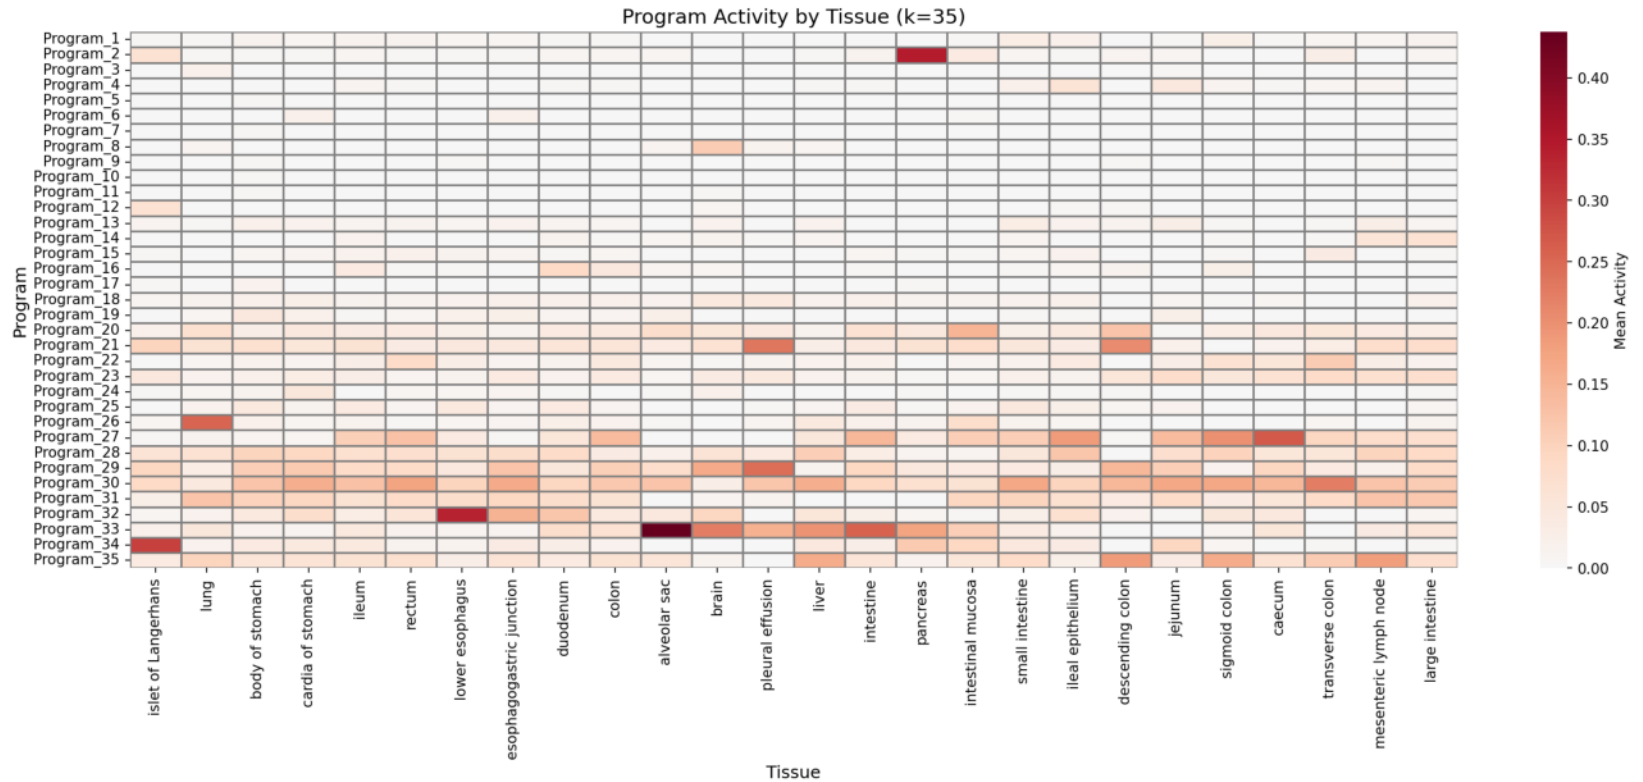

k = 36

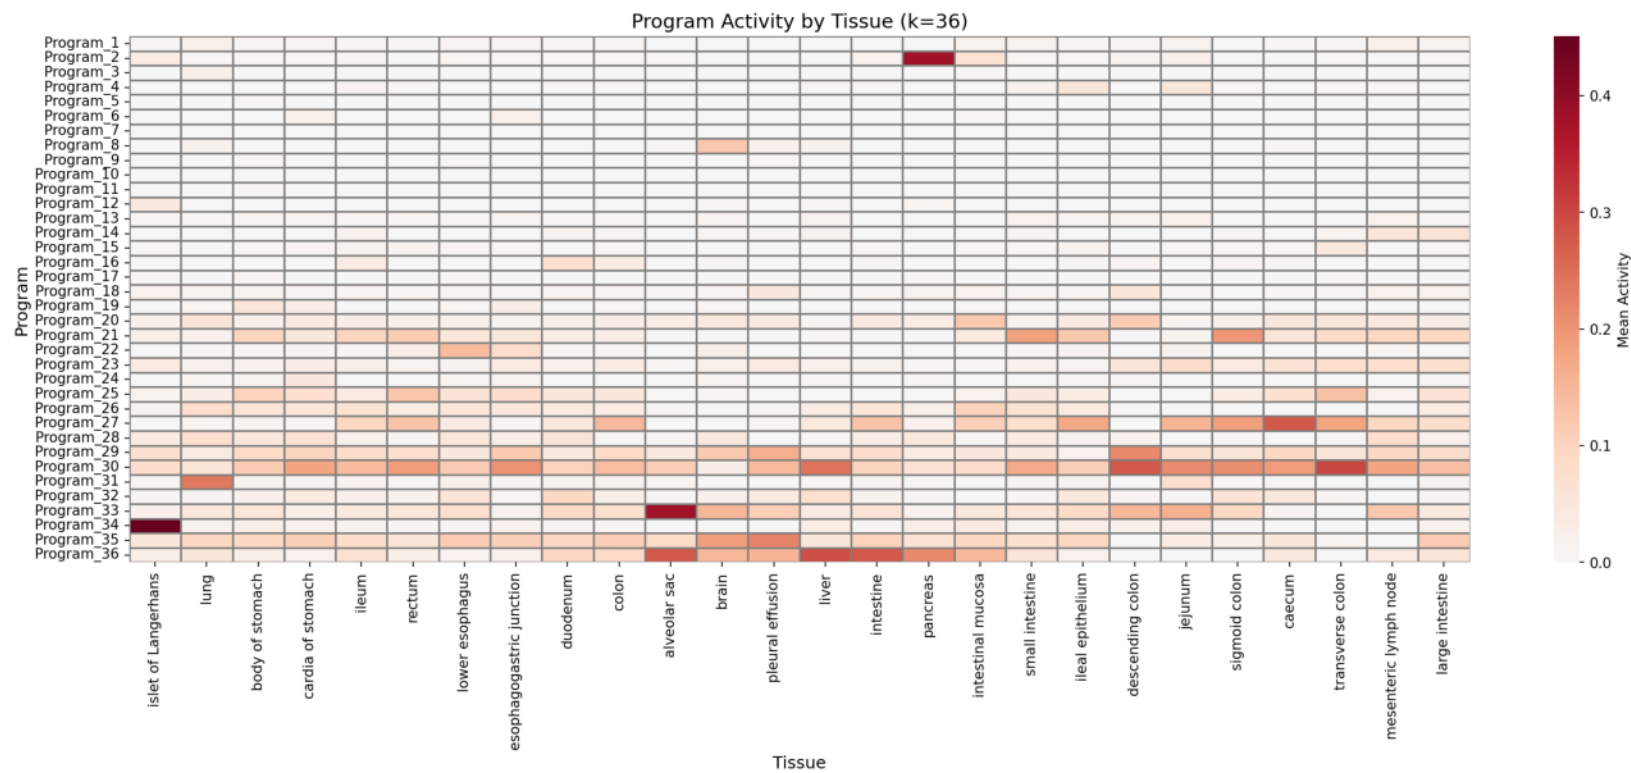

k = 37

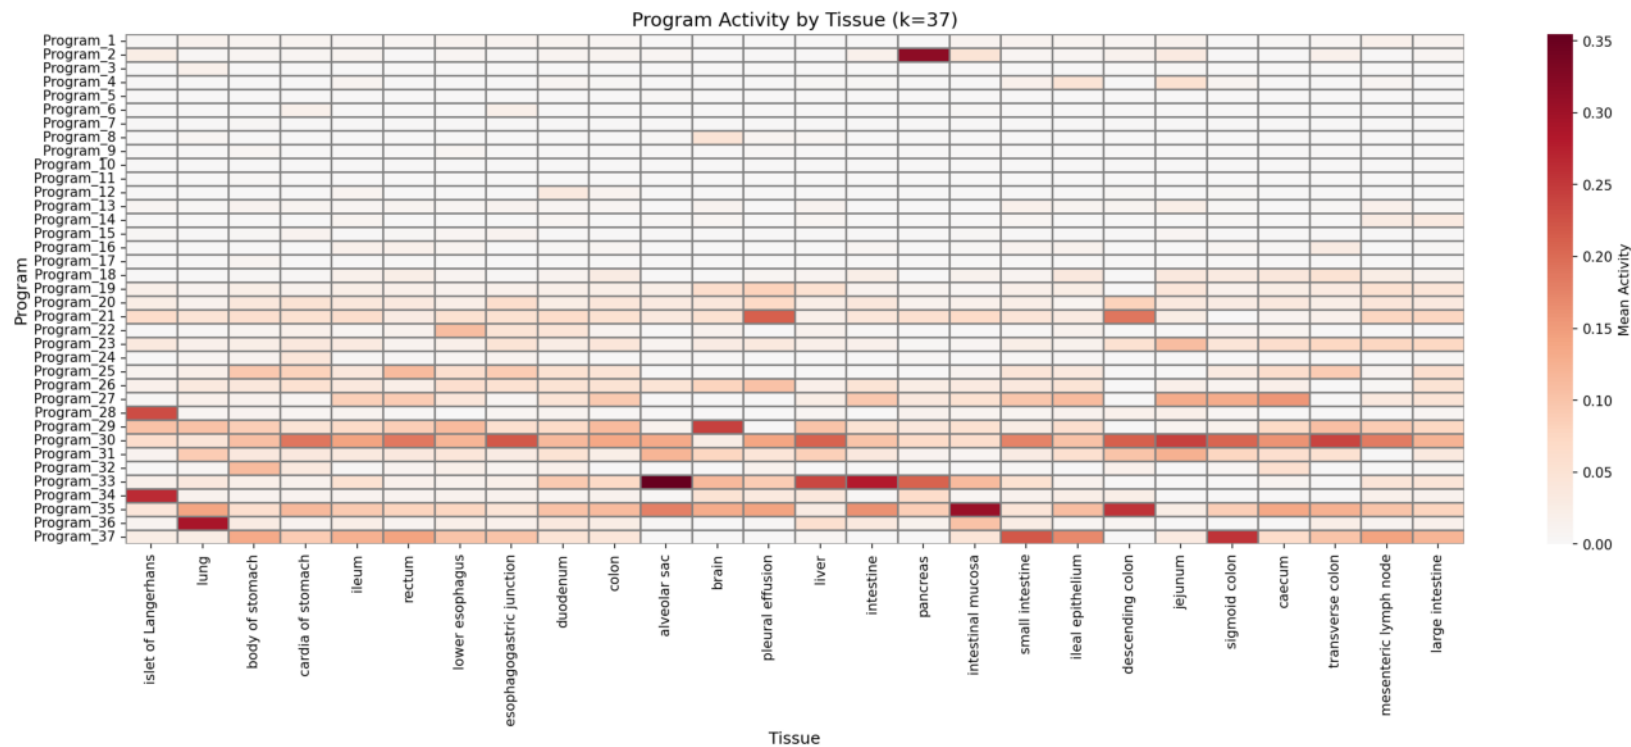

k = 38

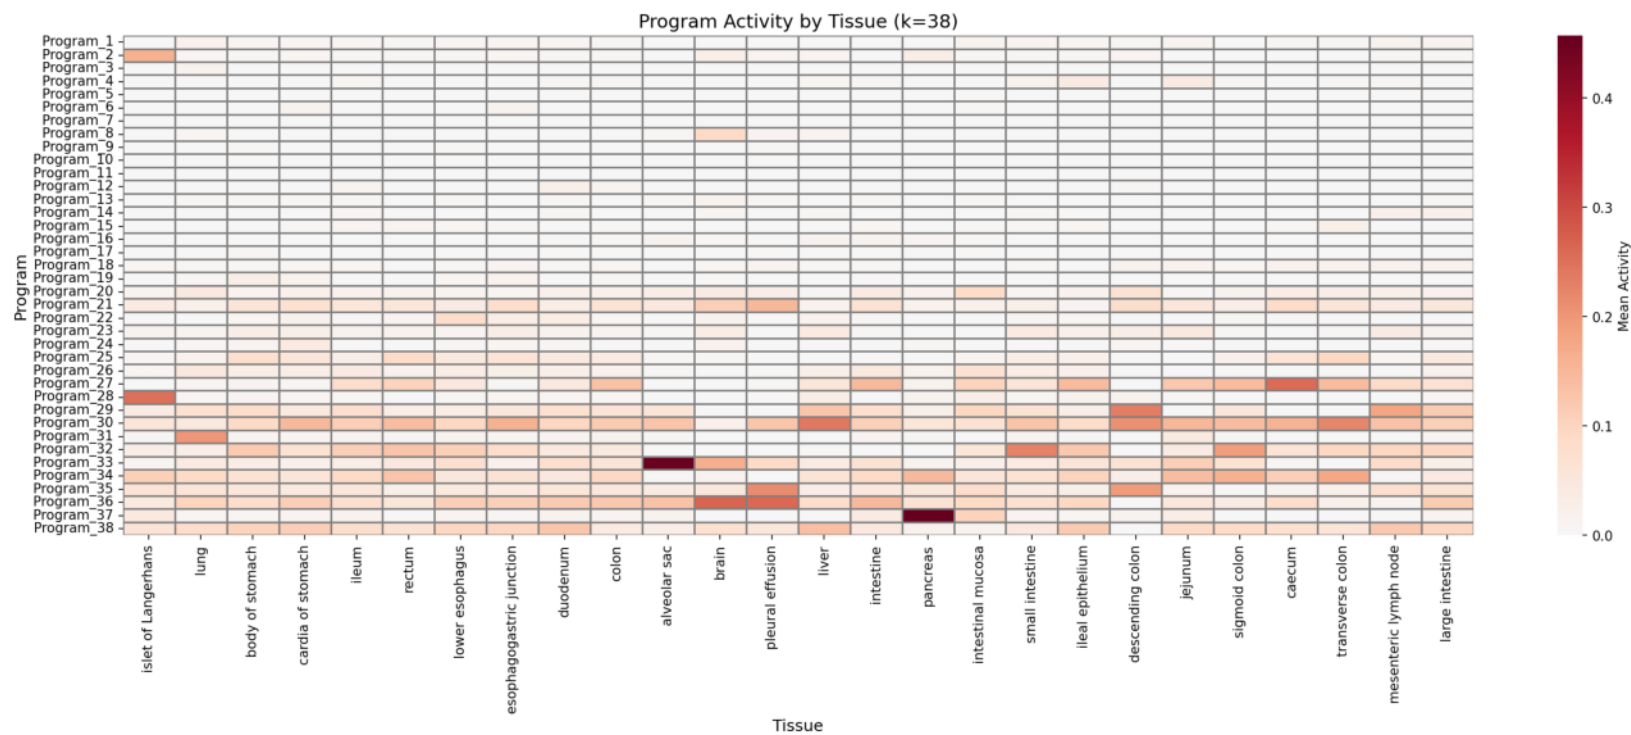

k = 39

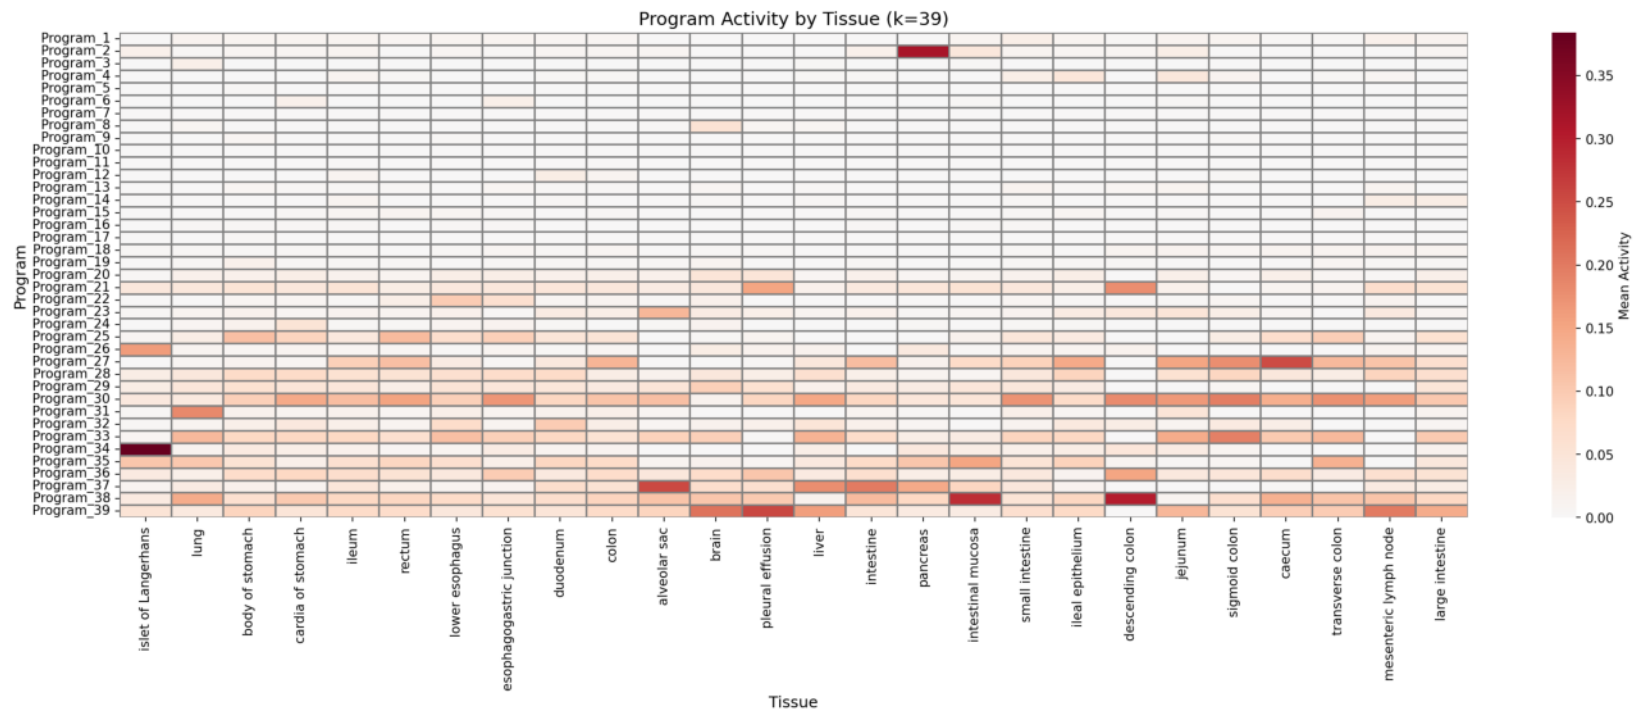

**k = 40**

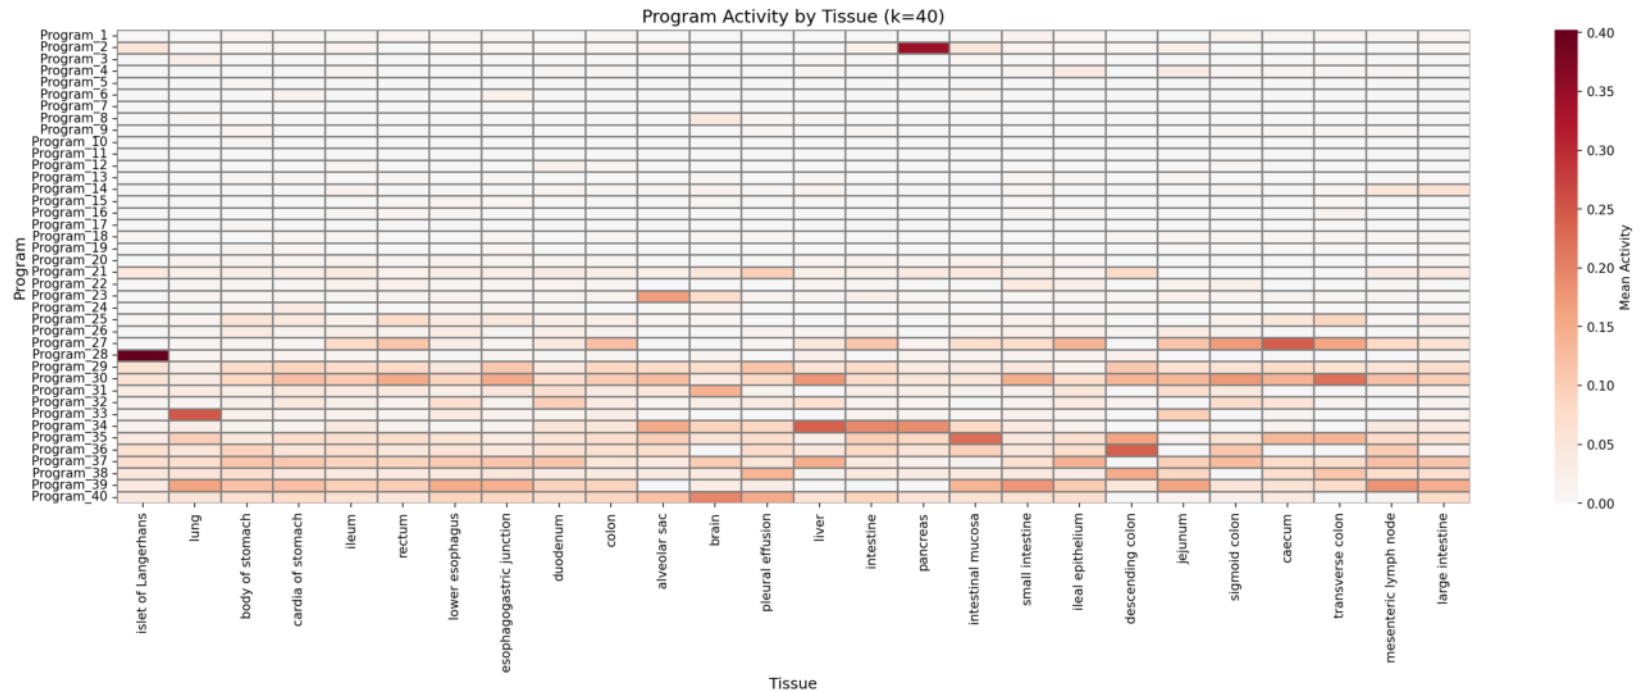



k = 41

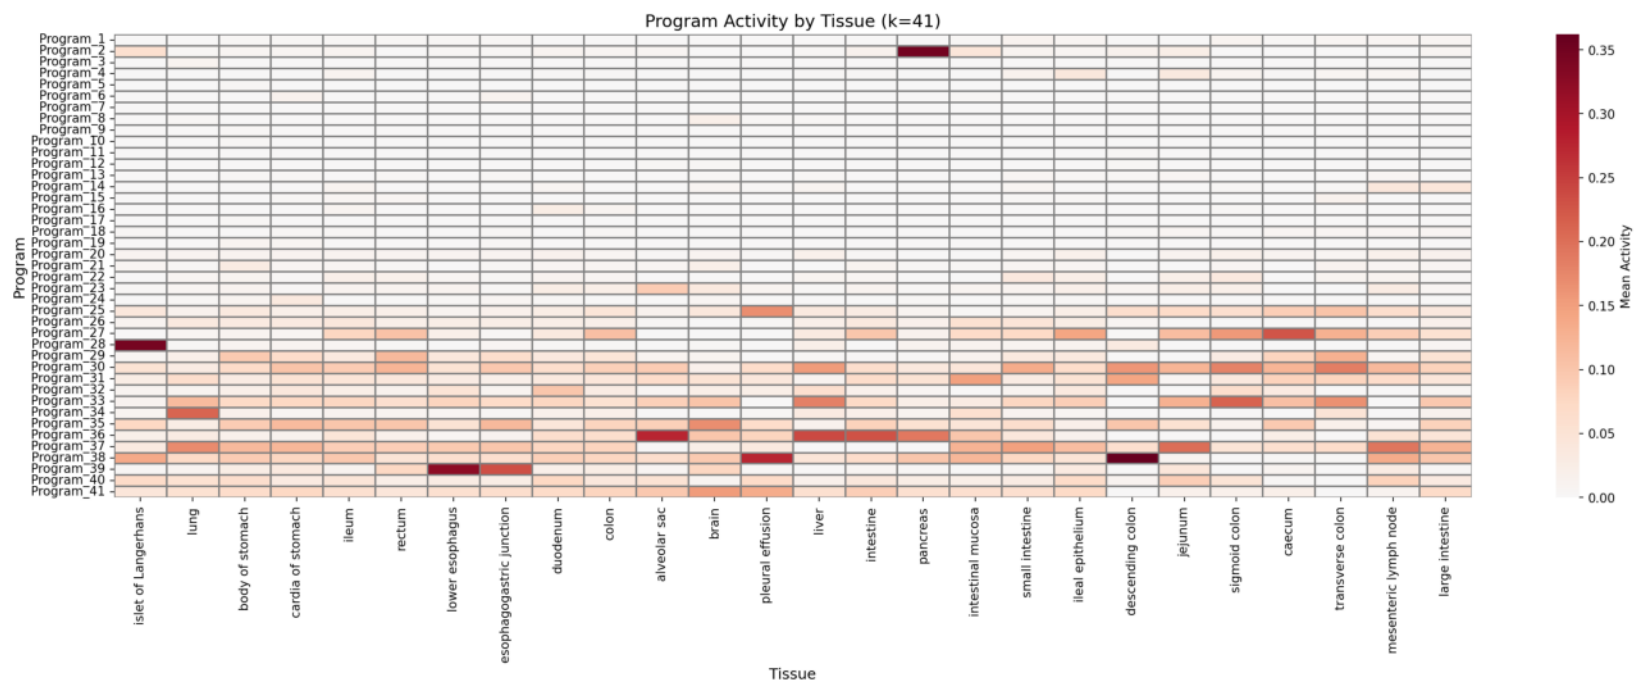

**k = 42**

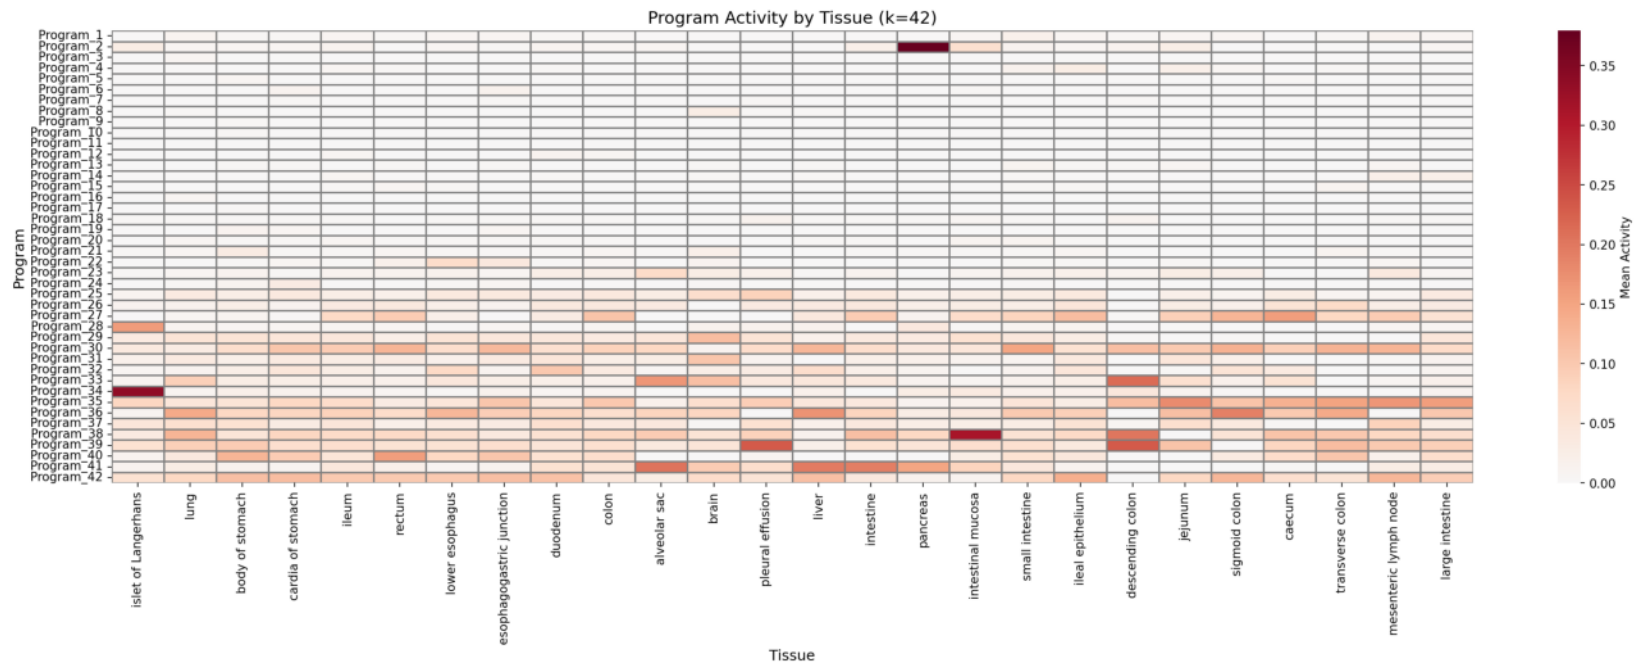

k = 43

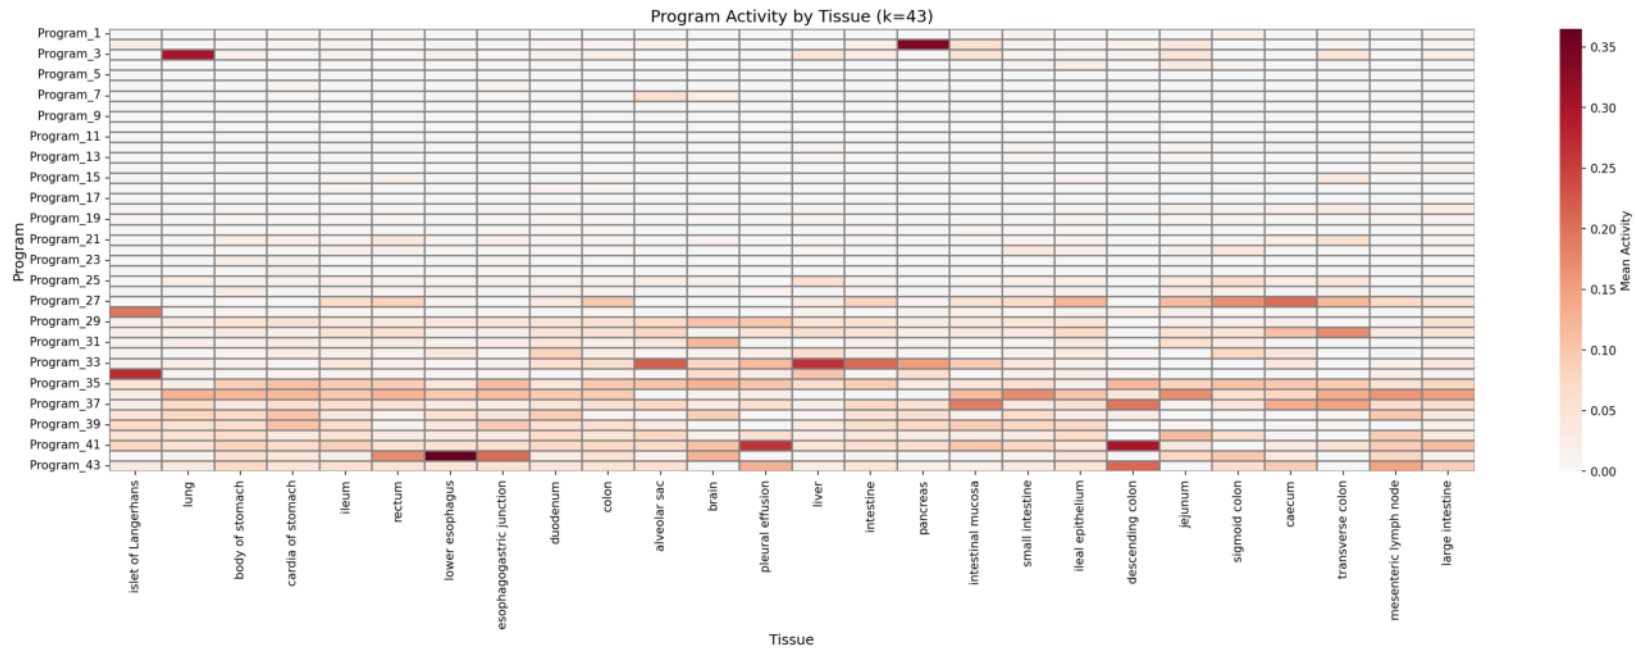

k = 44

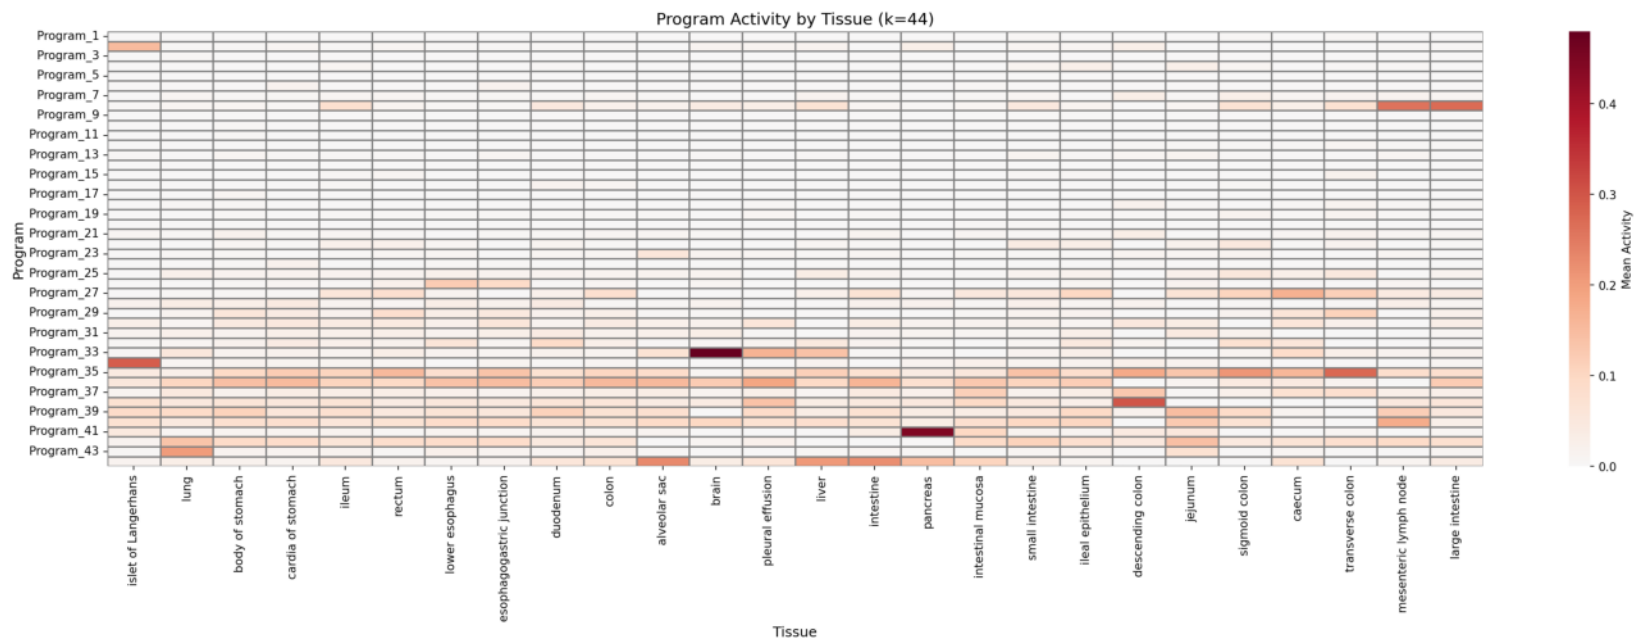

k = 45

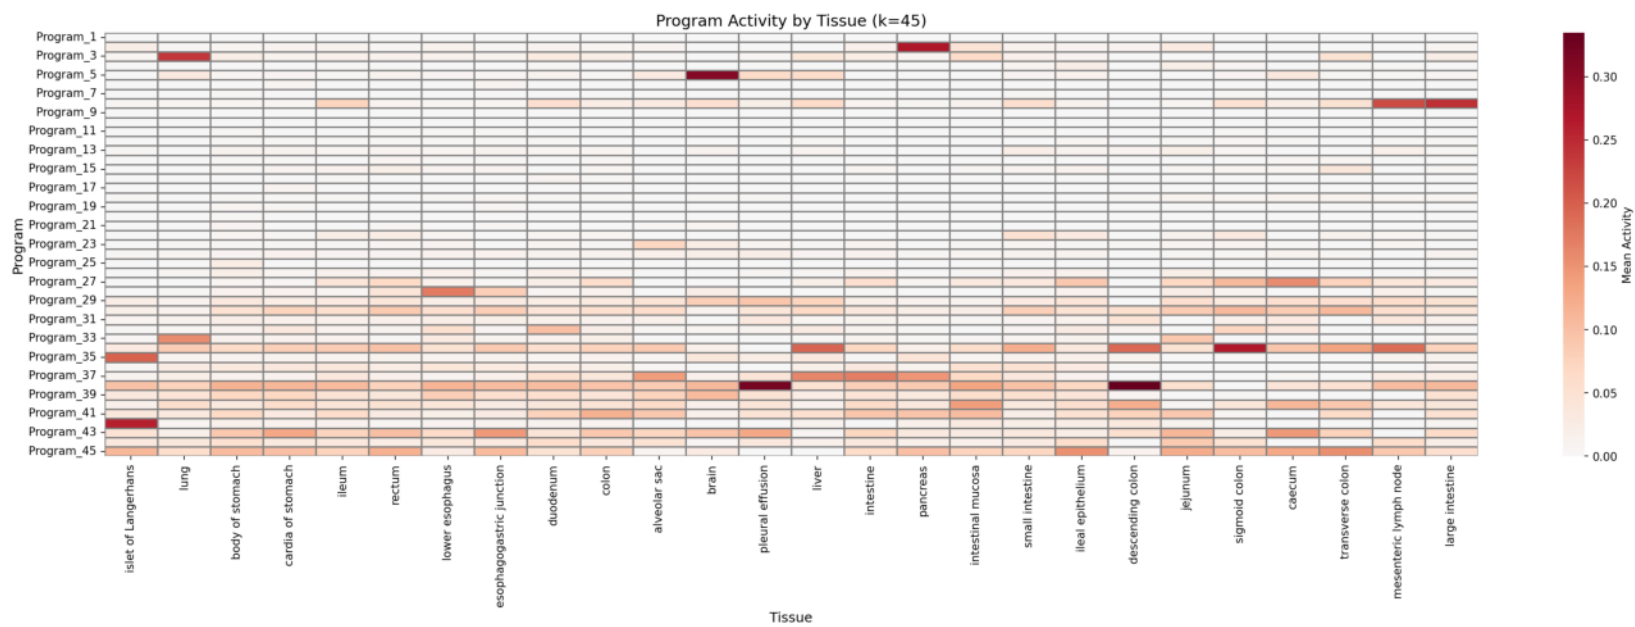

k = 46

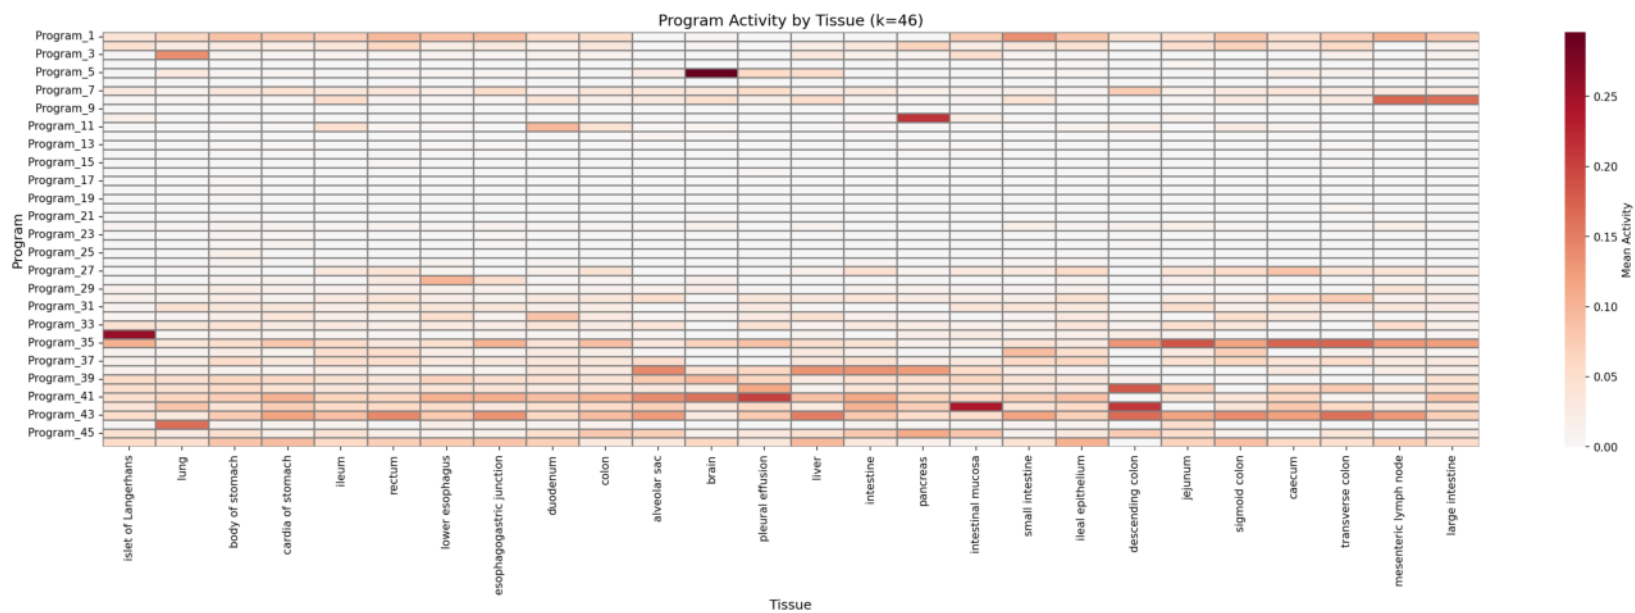

k = 47

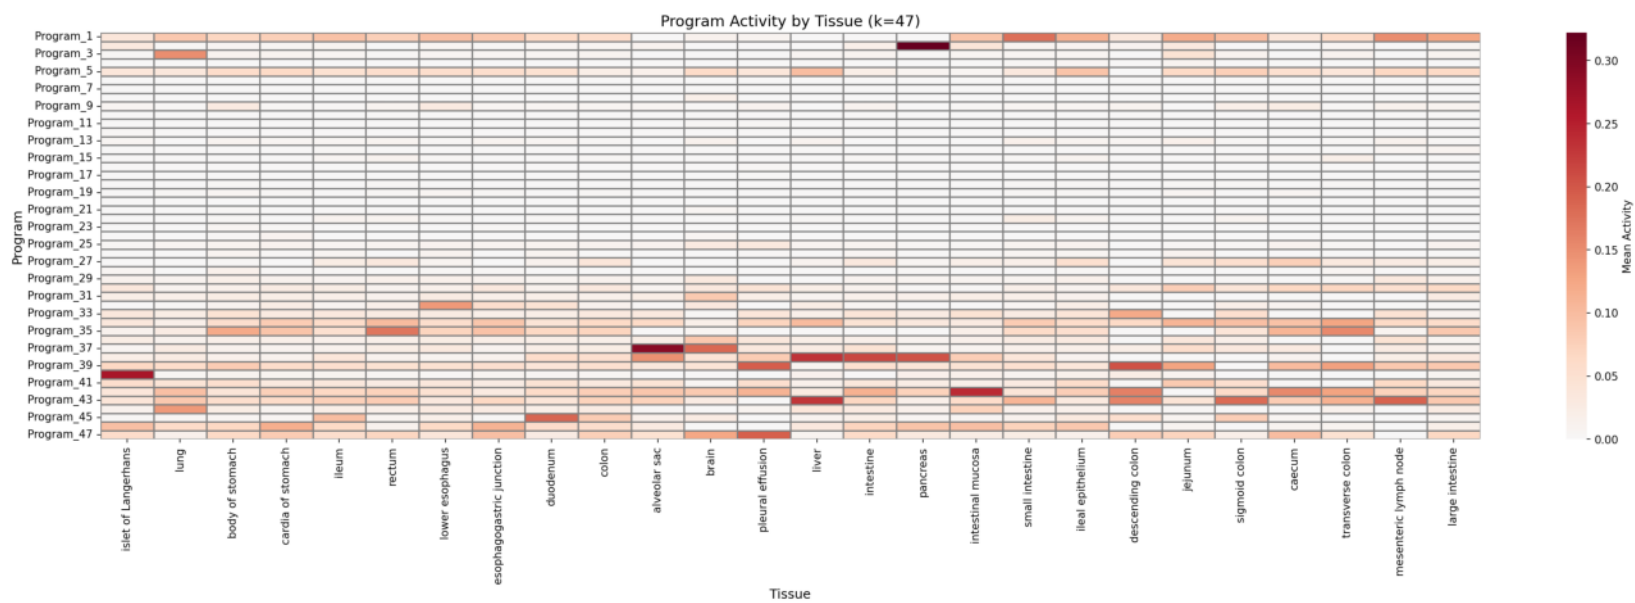

k = 48

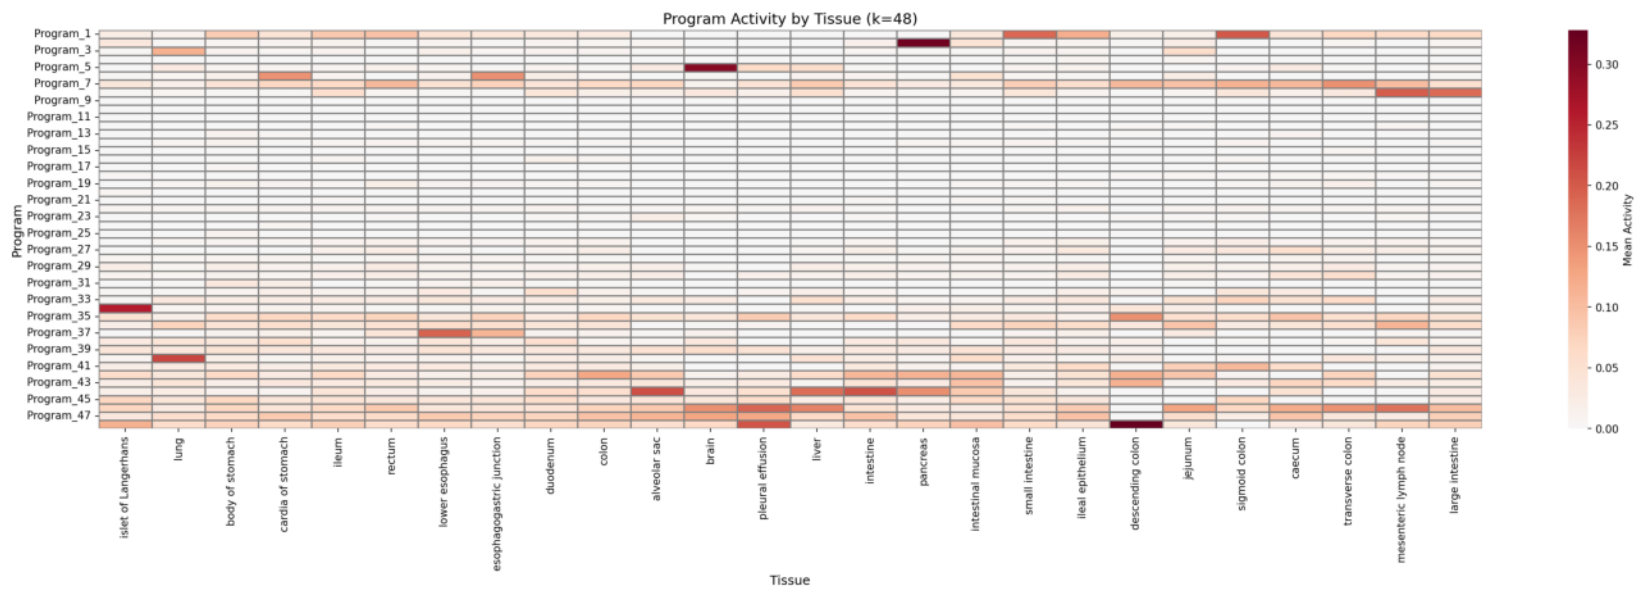



k = 49

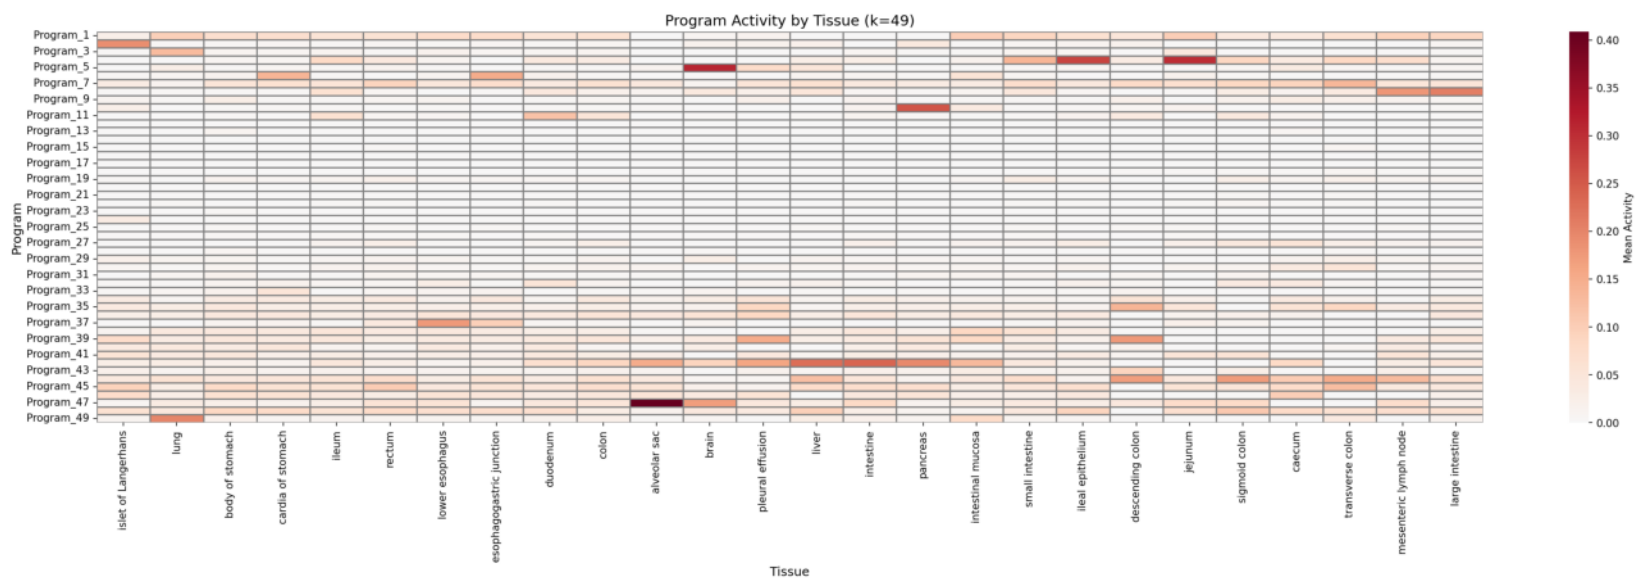

k = 50

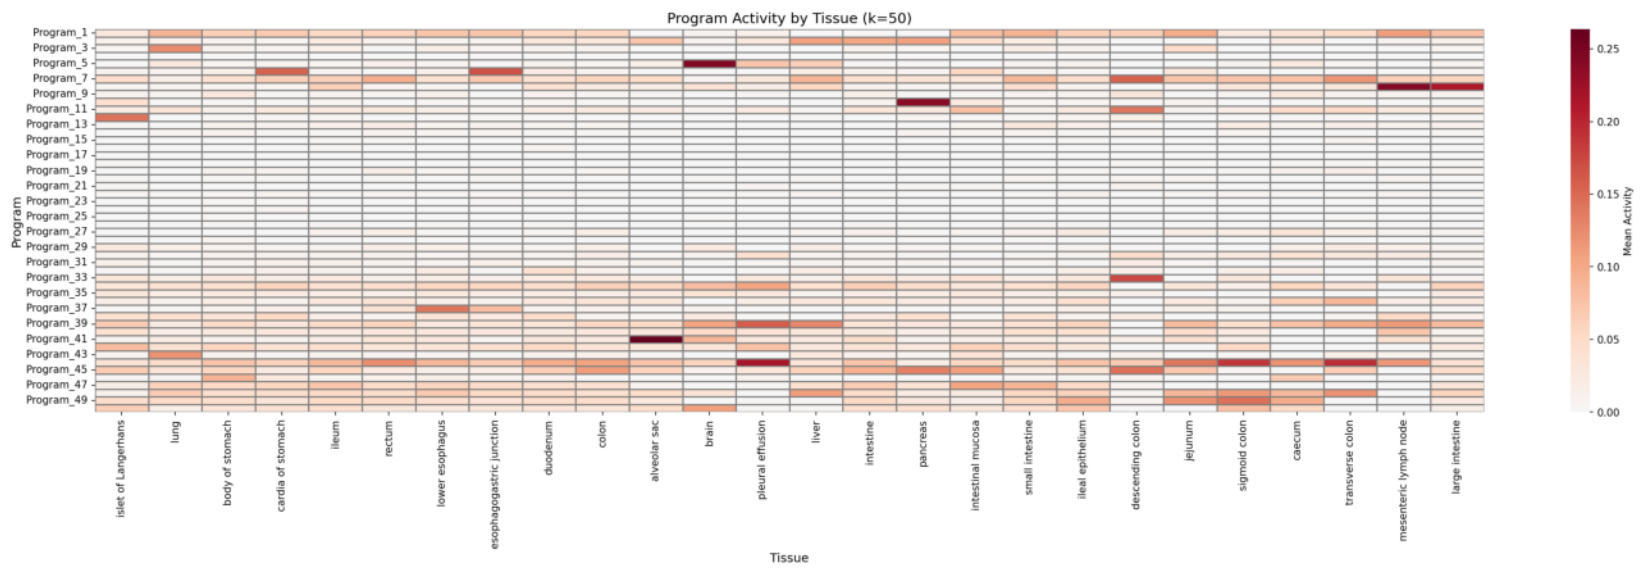

# Summary Analysis: Activity By Tissue

Tissue Specificity vs k

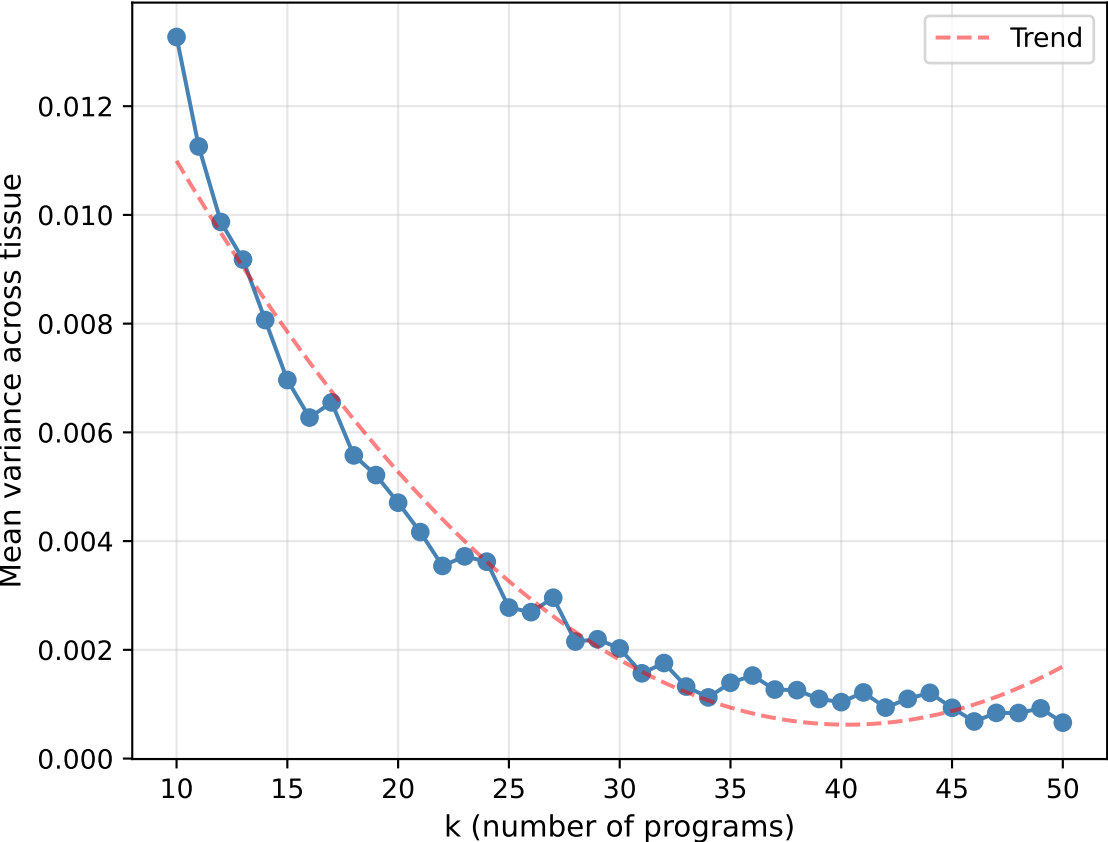

Variance Distribution

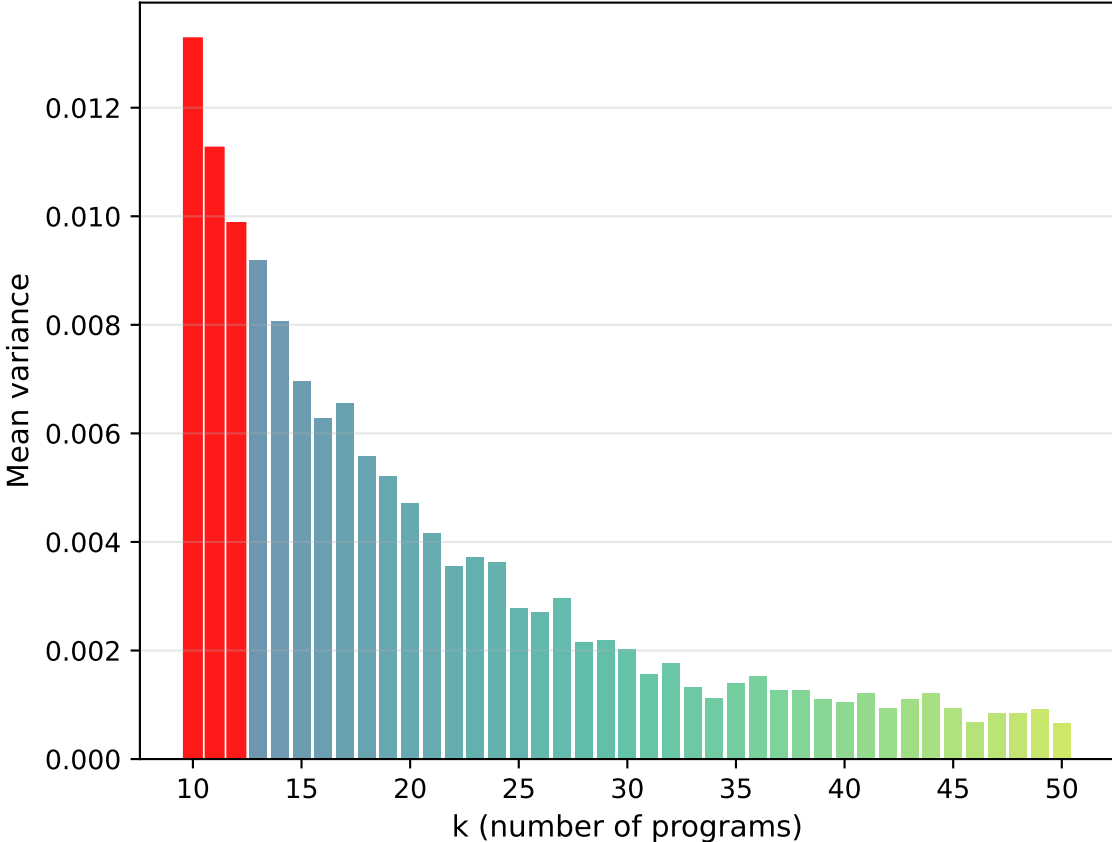

Specificity Score

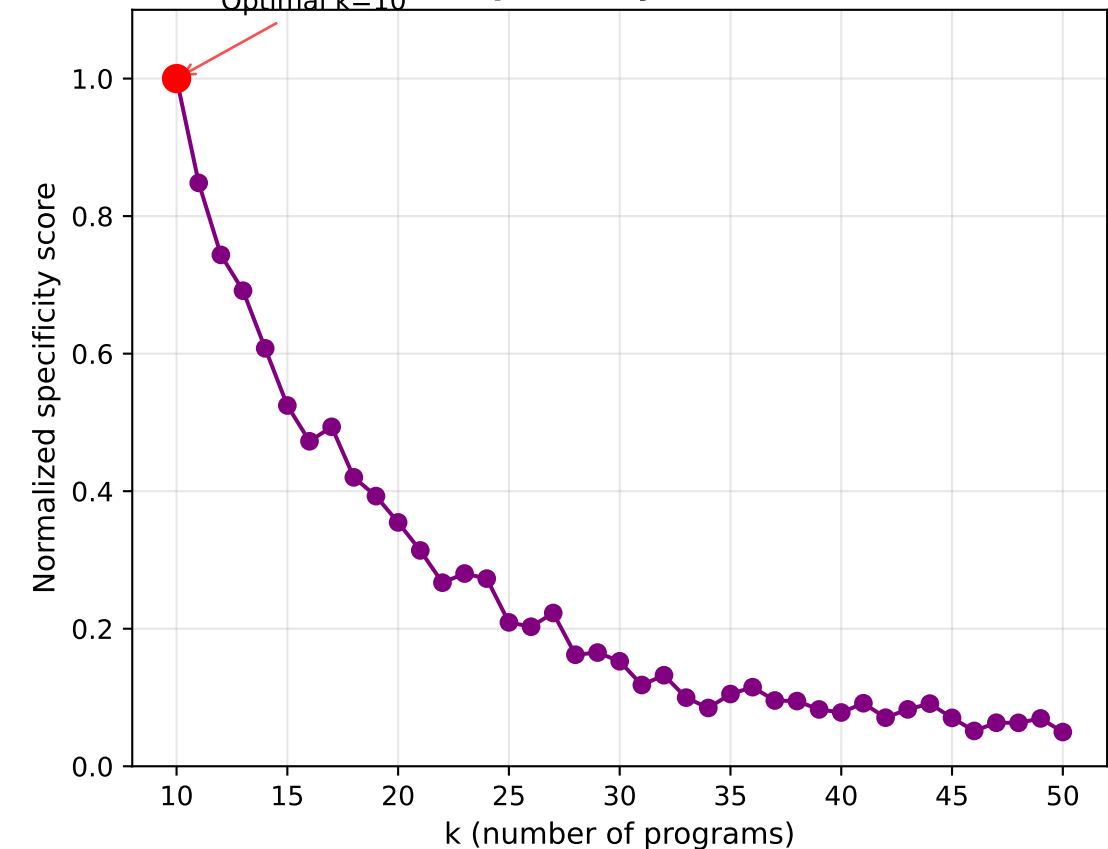

## Statistics Summary

K range analyzed: 10 - 50  
Number of tissue groups: 26  
Highest variance k: 10  
Mean variance: 0.0034  
Variance range: 0.0007 - 0.0133

## Top 5 k values by specificity:

1. k=10 (var=0.0133)
2. k=11 (var=0.0113)
3. k=12 (var=0.0099)
4. k=13 (var=0.0092)
5. k=14 (var=0.0081)
