# Supplementary material
Source: ML conference proceedings conference paper supplement (https://openreview.net/forum?id=h40Nyr36om)

Endocrine Cell Dataset Analysis: Cell Types, Tissues, and Diseases

Top 10 Endocrine Cell Types

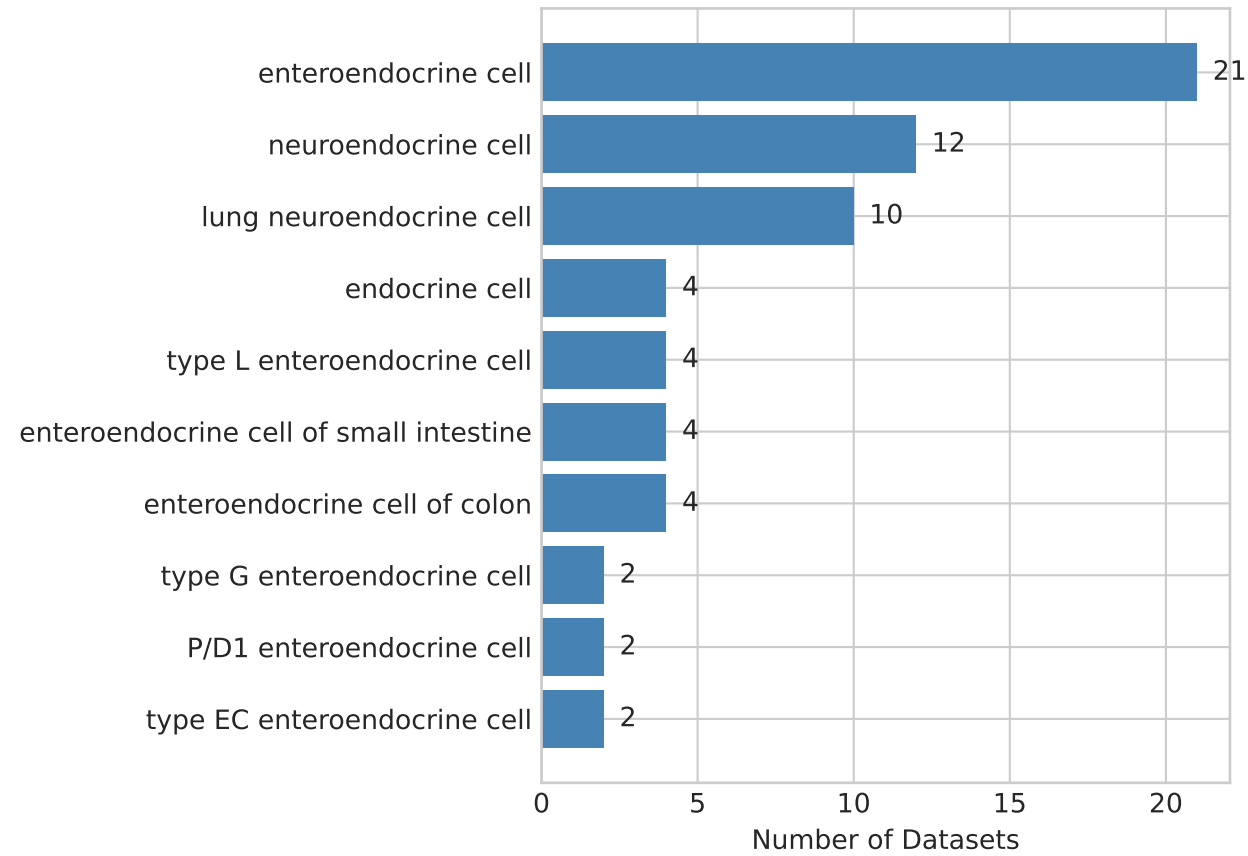

Top 15 Tissues with Endocrine Cells

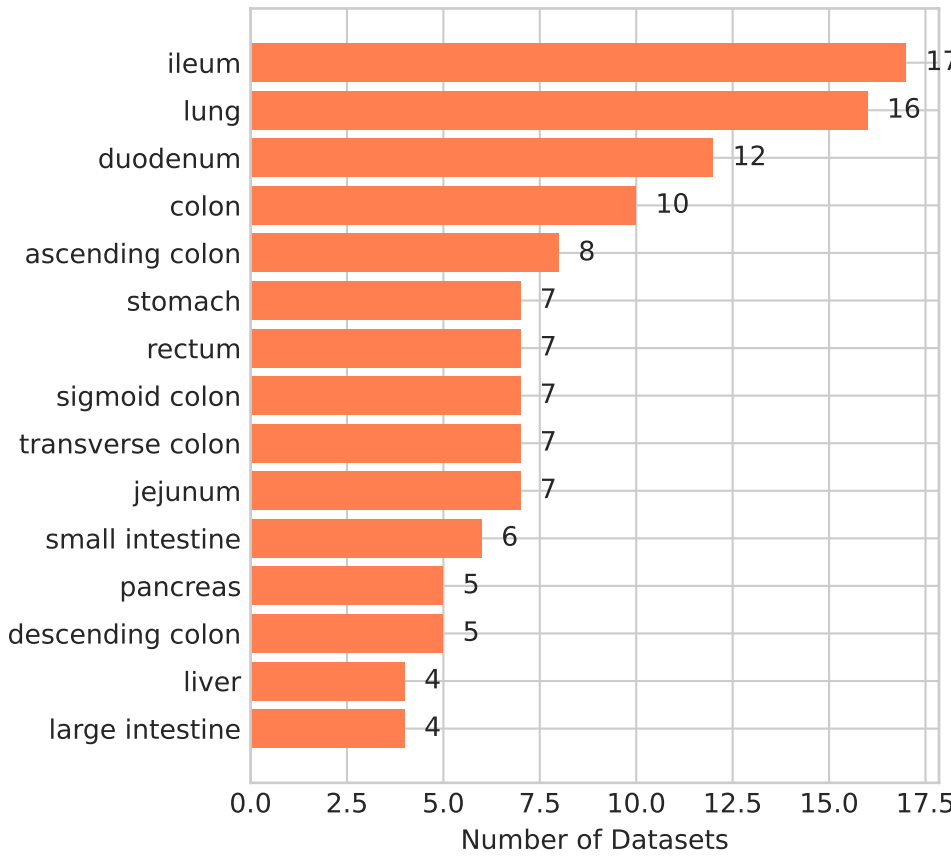

Top 10 Disease Associations

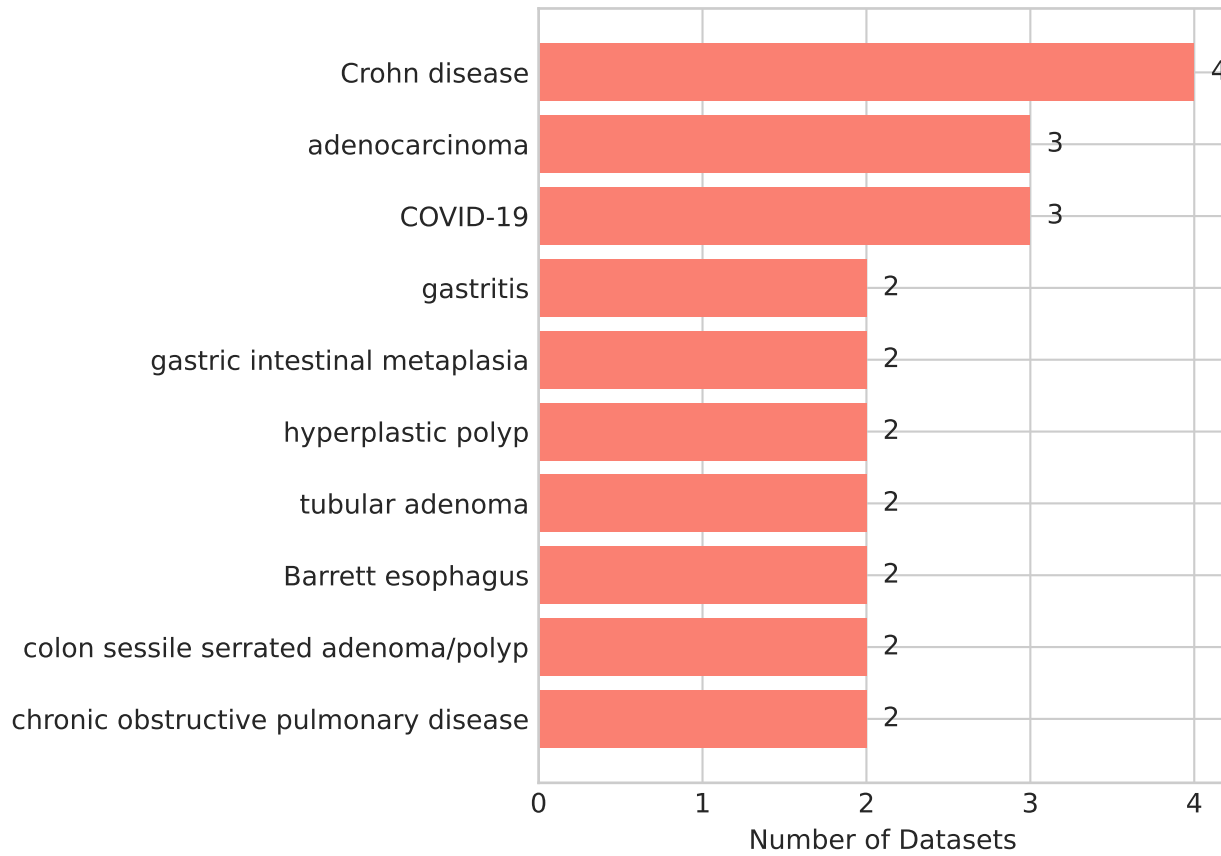

Distribution of Endocrine Cell Percentages

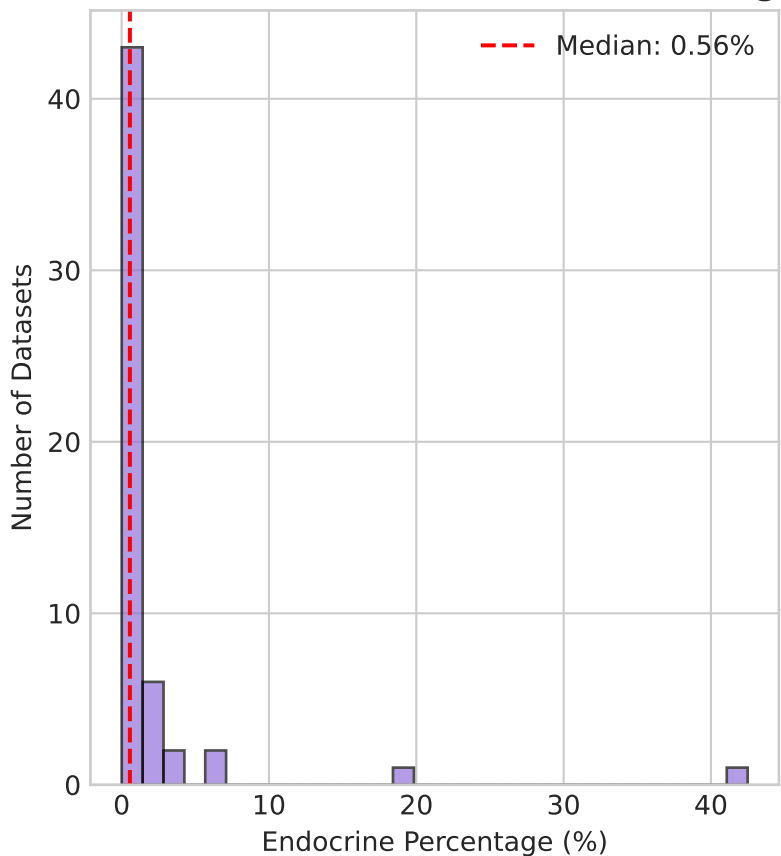

Distribution of Dataset Sizes

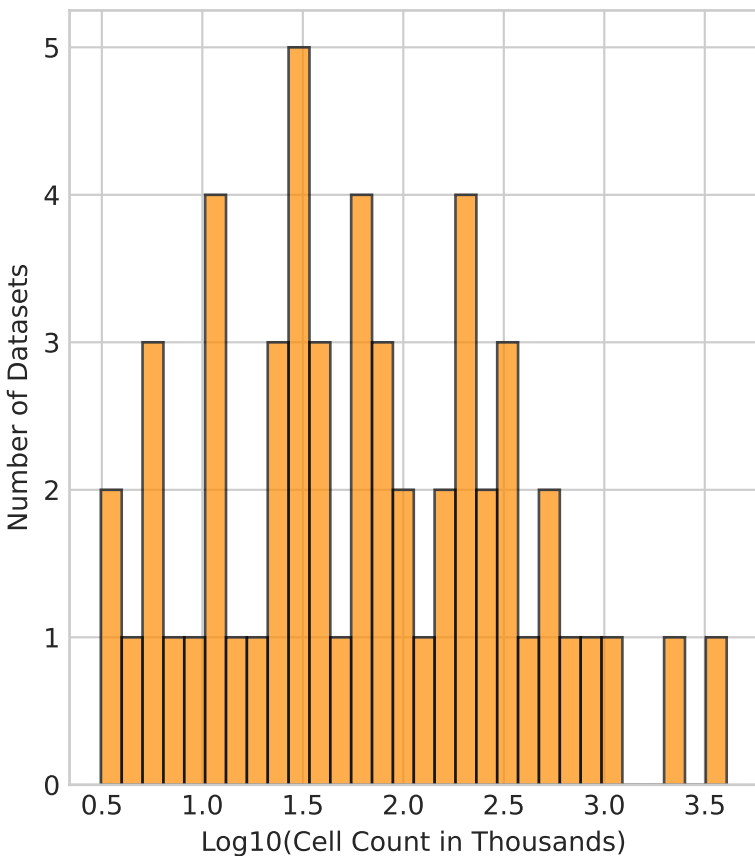

Organ System Distribution

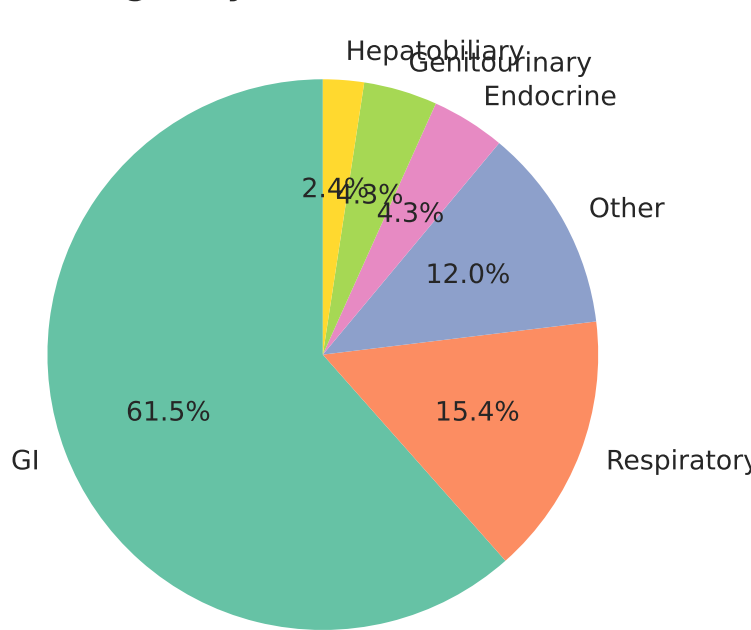

Cell Type-Tissue Co-occurrence

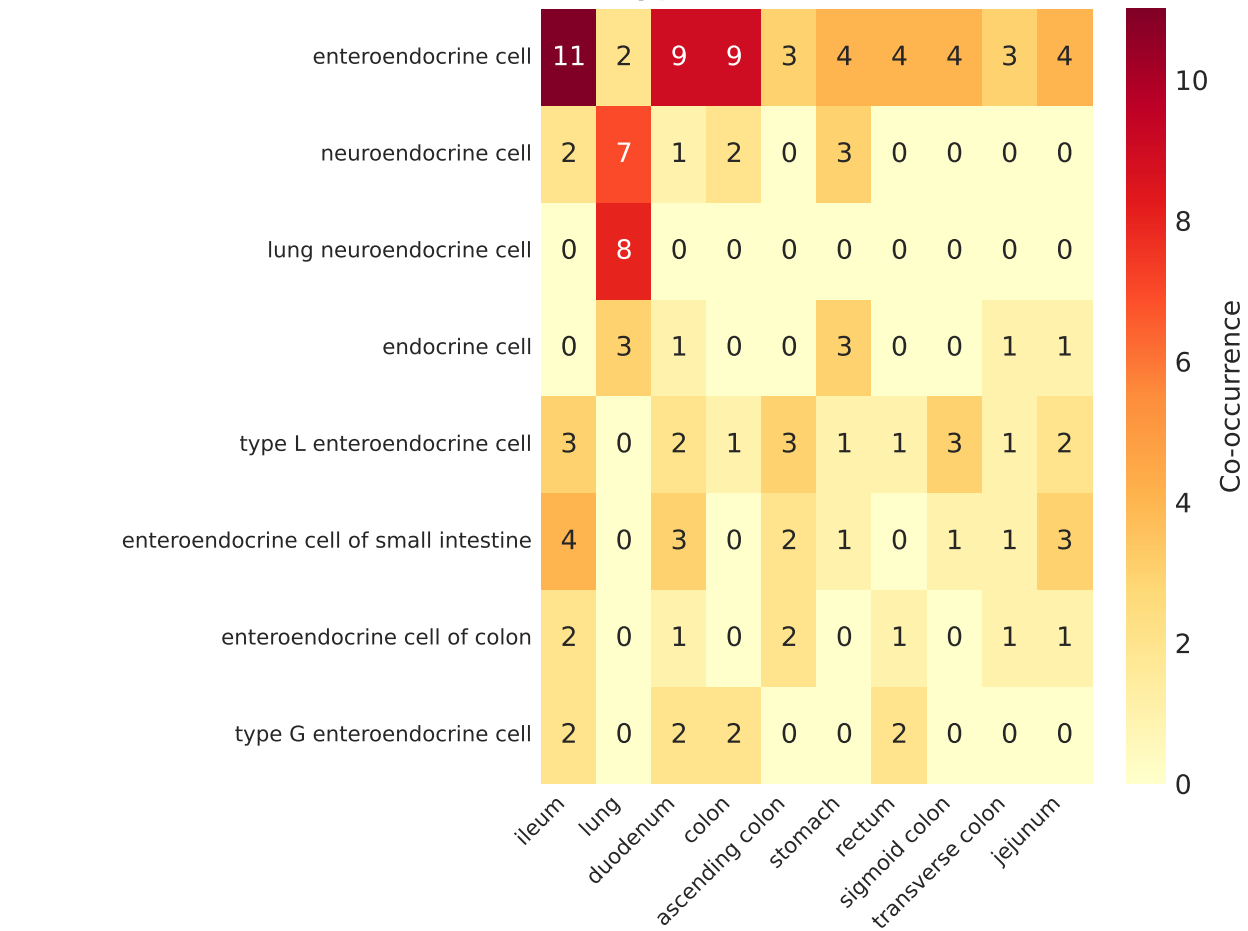

Top Sequencing Technologies

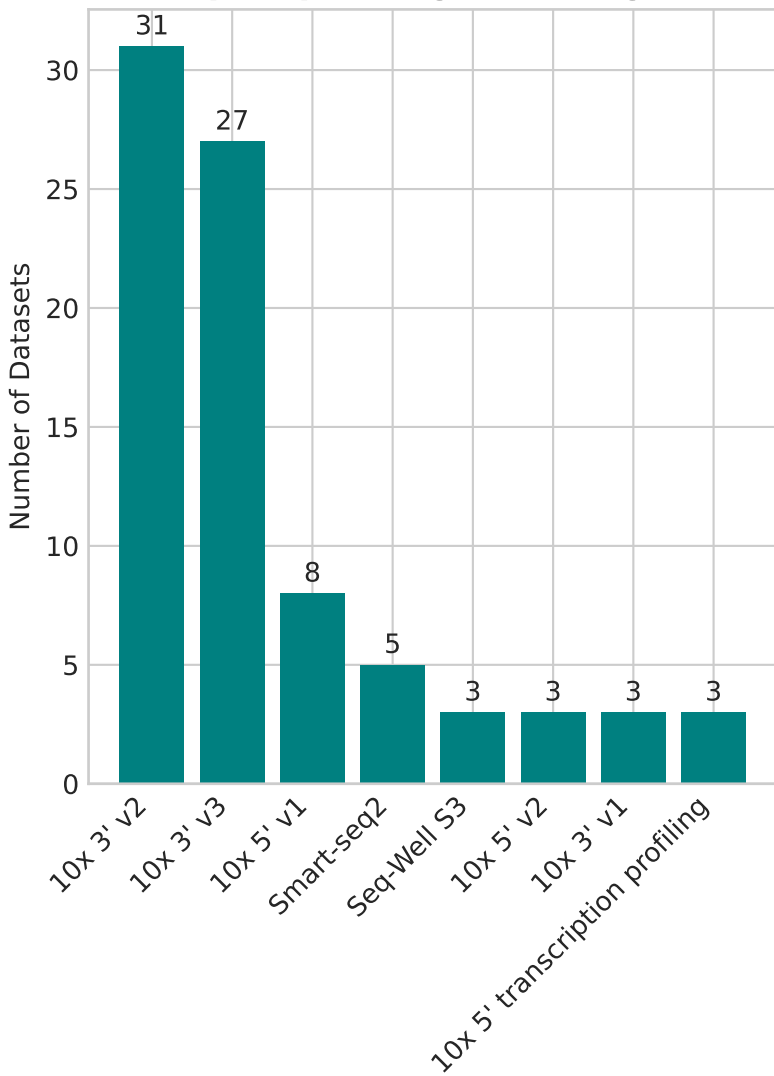

Endocrine Enrichment vs Dataset Size

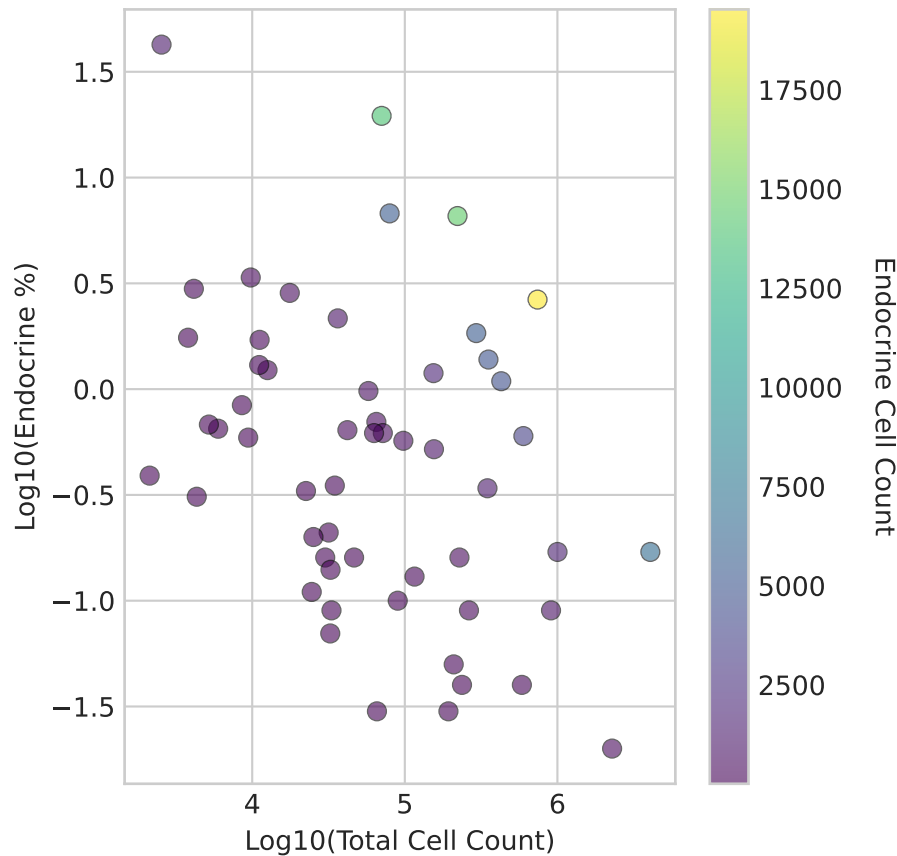

Supplement: supplementary_material [file endocrine_metadata_overview.pdf › metadata/endocrine_metadata_overview.pdf]
