# Supplementary material
Source: ML conference proceedings conference paper supplement (https://openreview.net/forum?id=h40Nyr36om)

# Network Relationships in Endocrine Cell Datasets

## Cell Type - Tissue Network

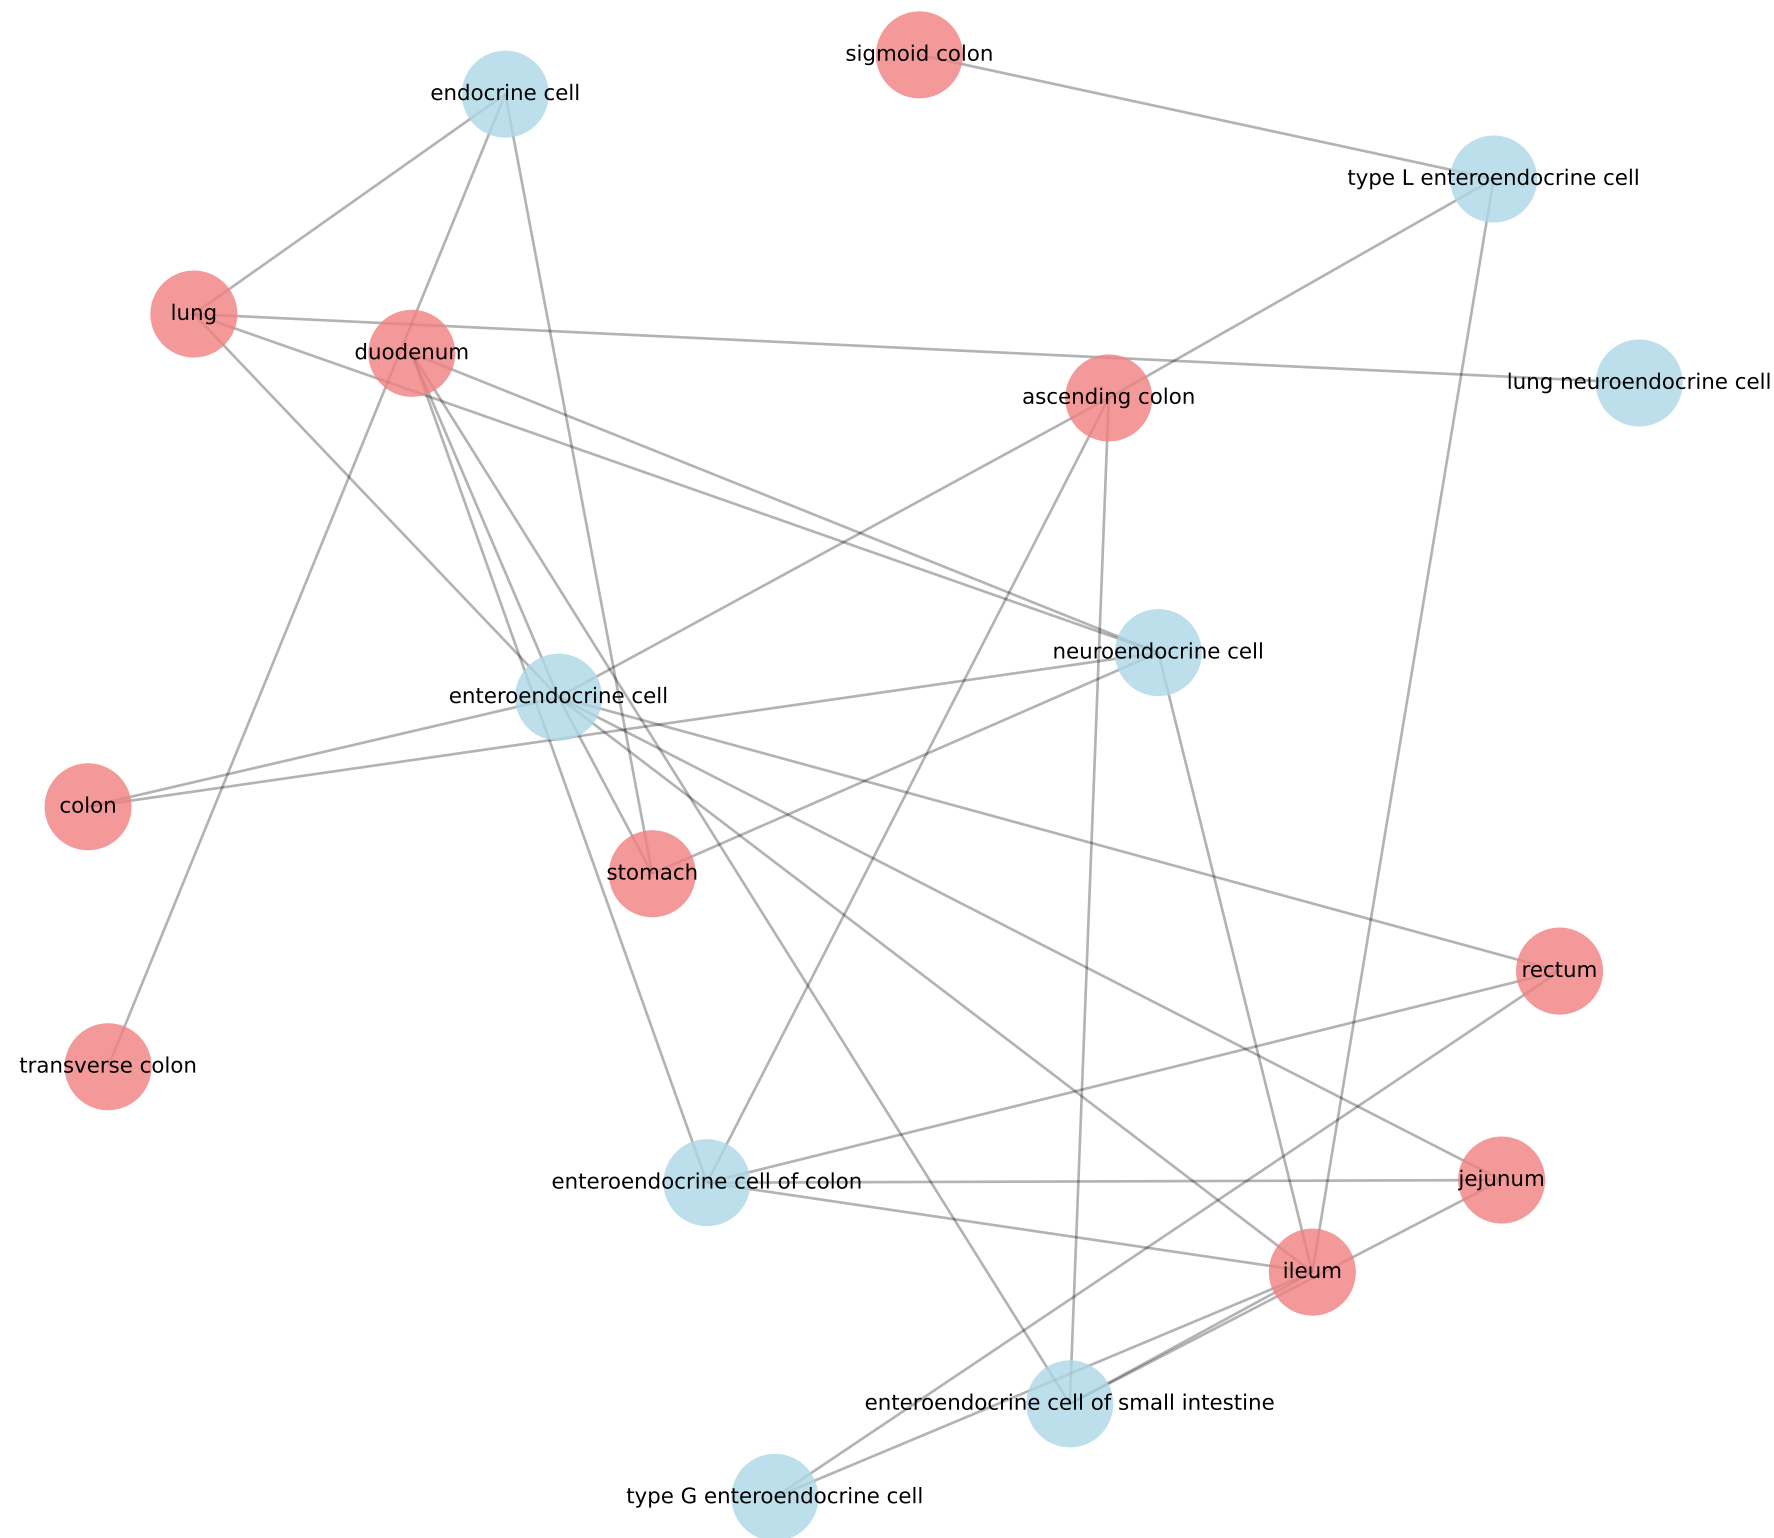

## Cell Type - Disease Network

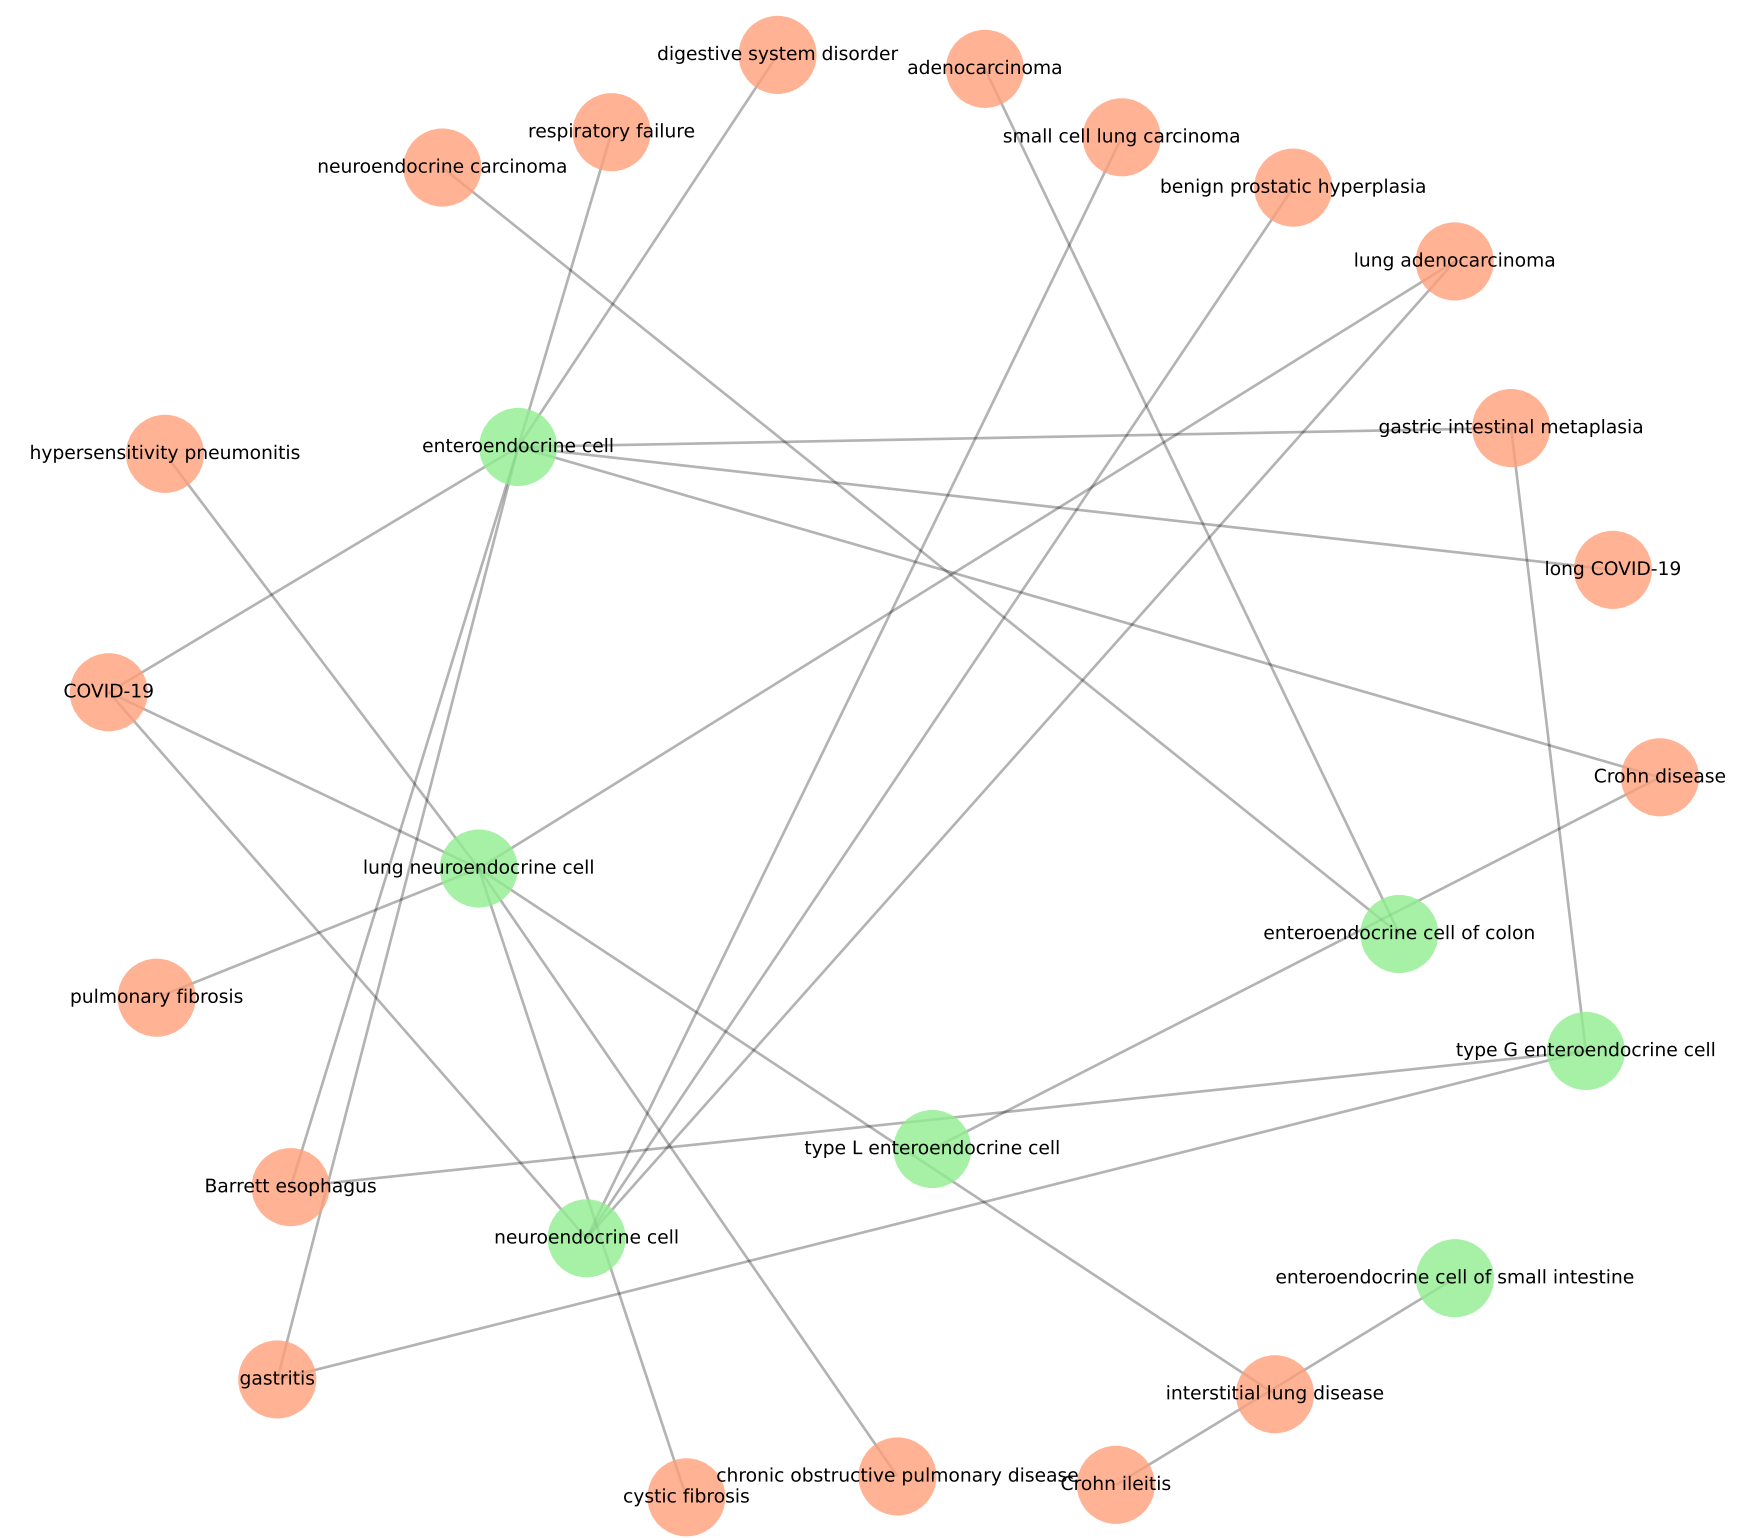

Supplement: supplementary_material [file endocrine_networks.pdf › metadata/endocrine_networks.pdf]
