# Supplementary material
Source: ML conference proceedings conference paper supplement (https://openreview.net/forum?id=h40Nyr36om)

Mapped Tissue Category Co-occurrence Analysis in Endocrine Cell Datasets

Tissue Category-Disease Co-occurrence Matrix

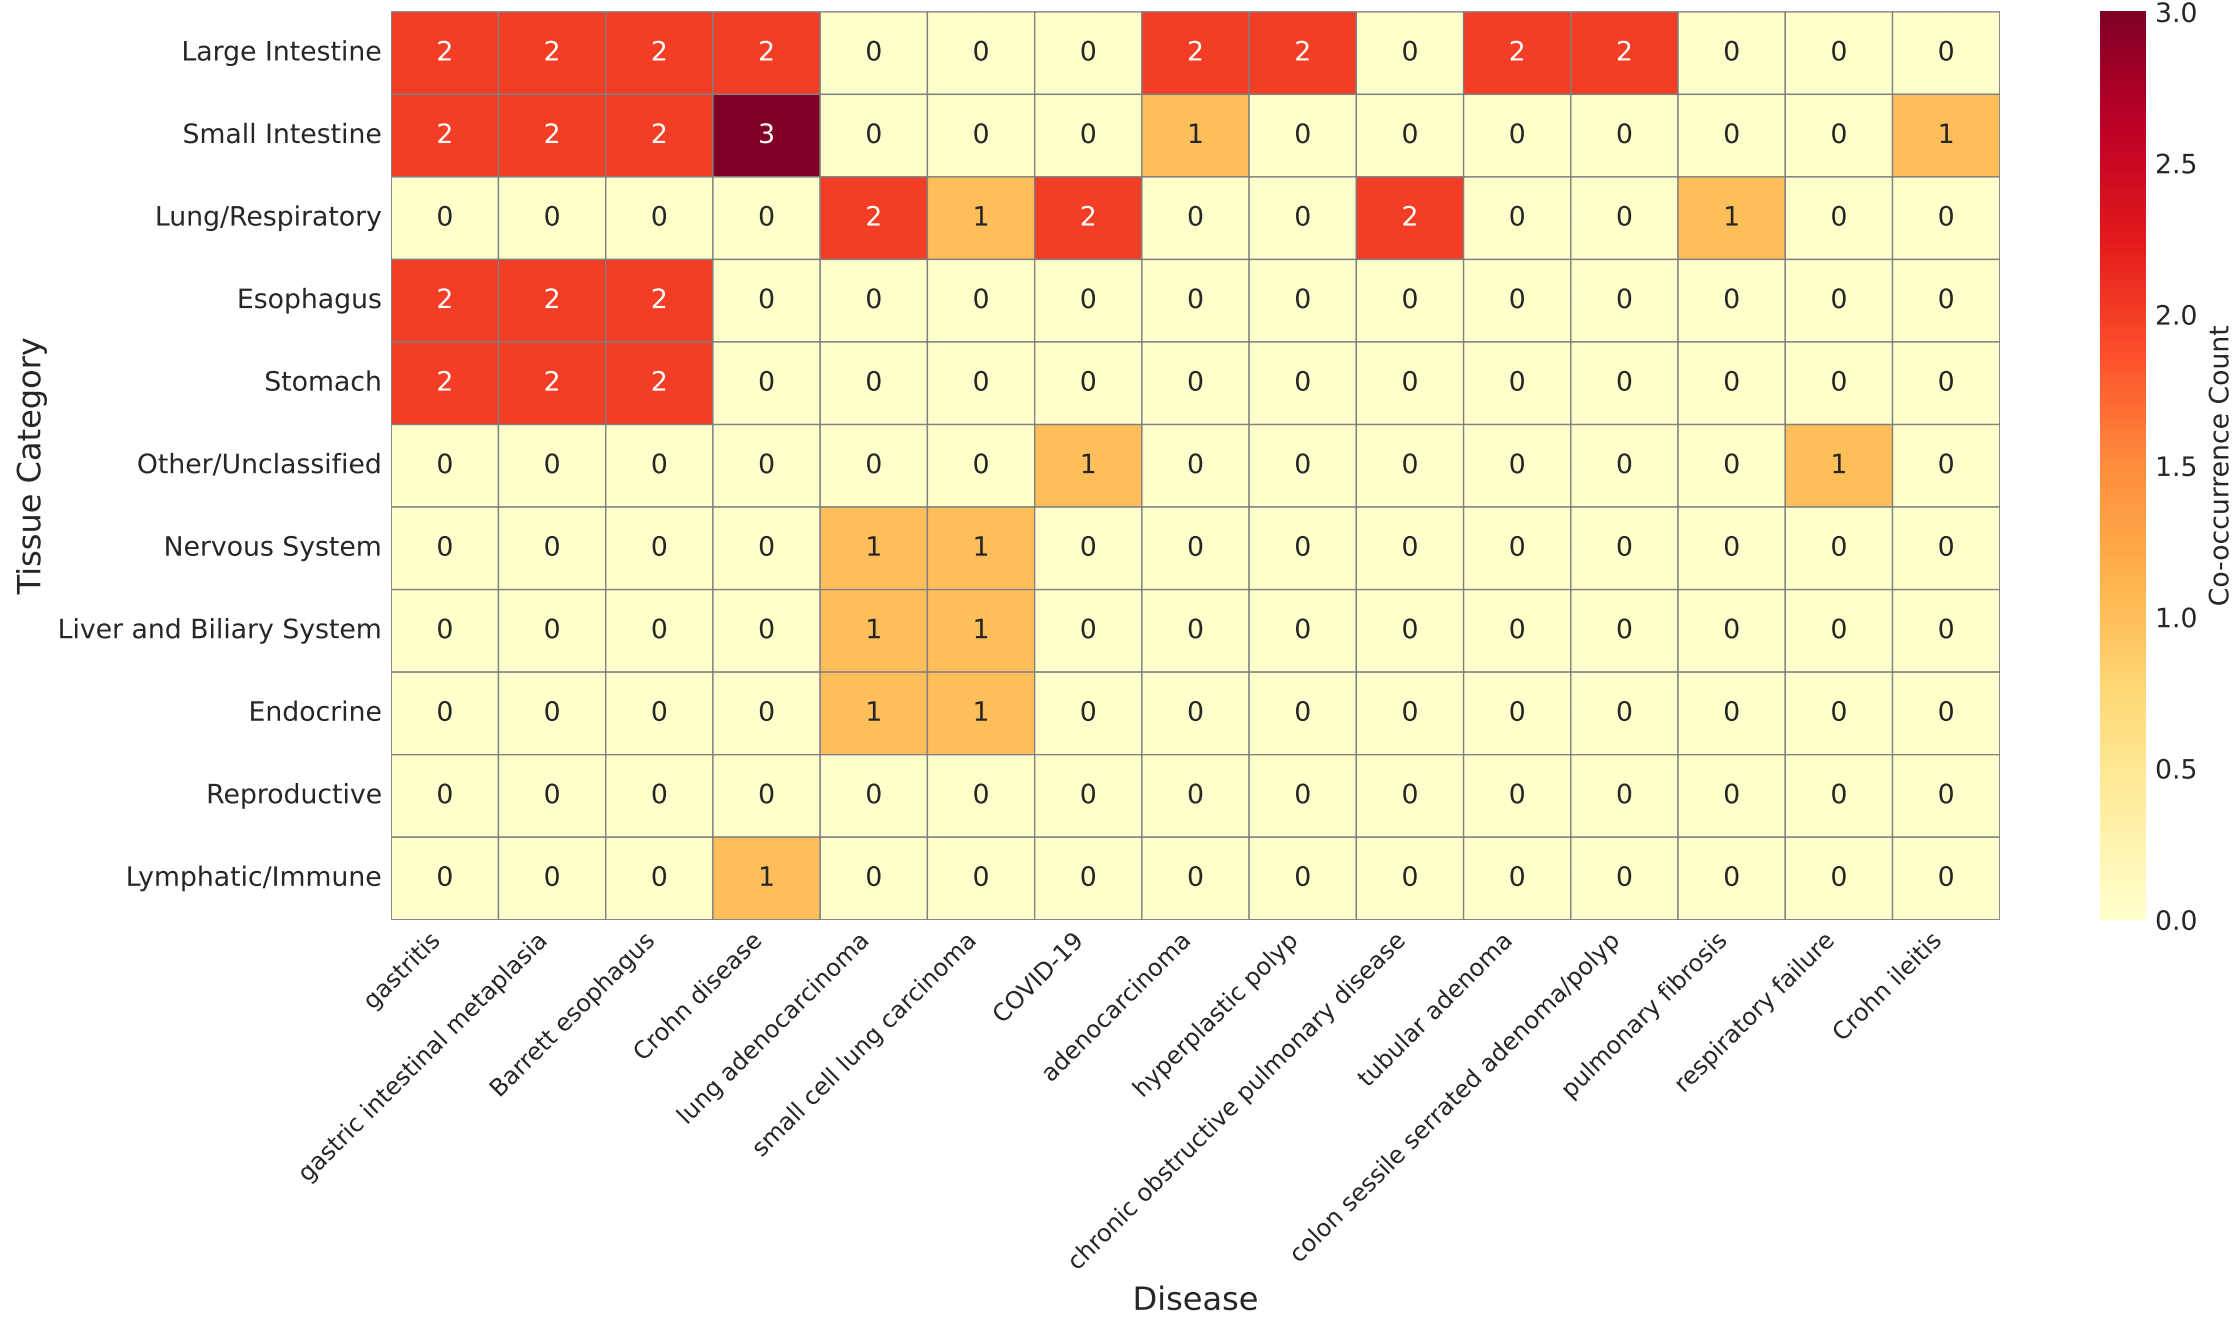

Cell Type-Disease Co-occurrence Matrix

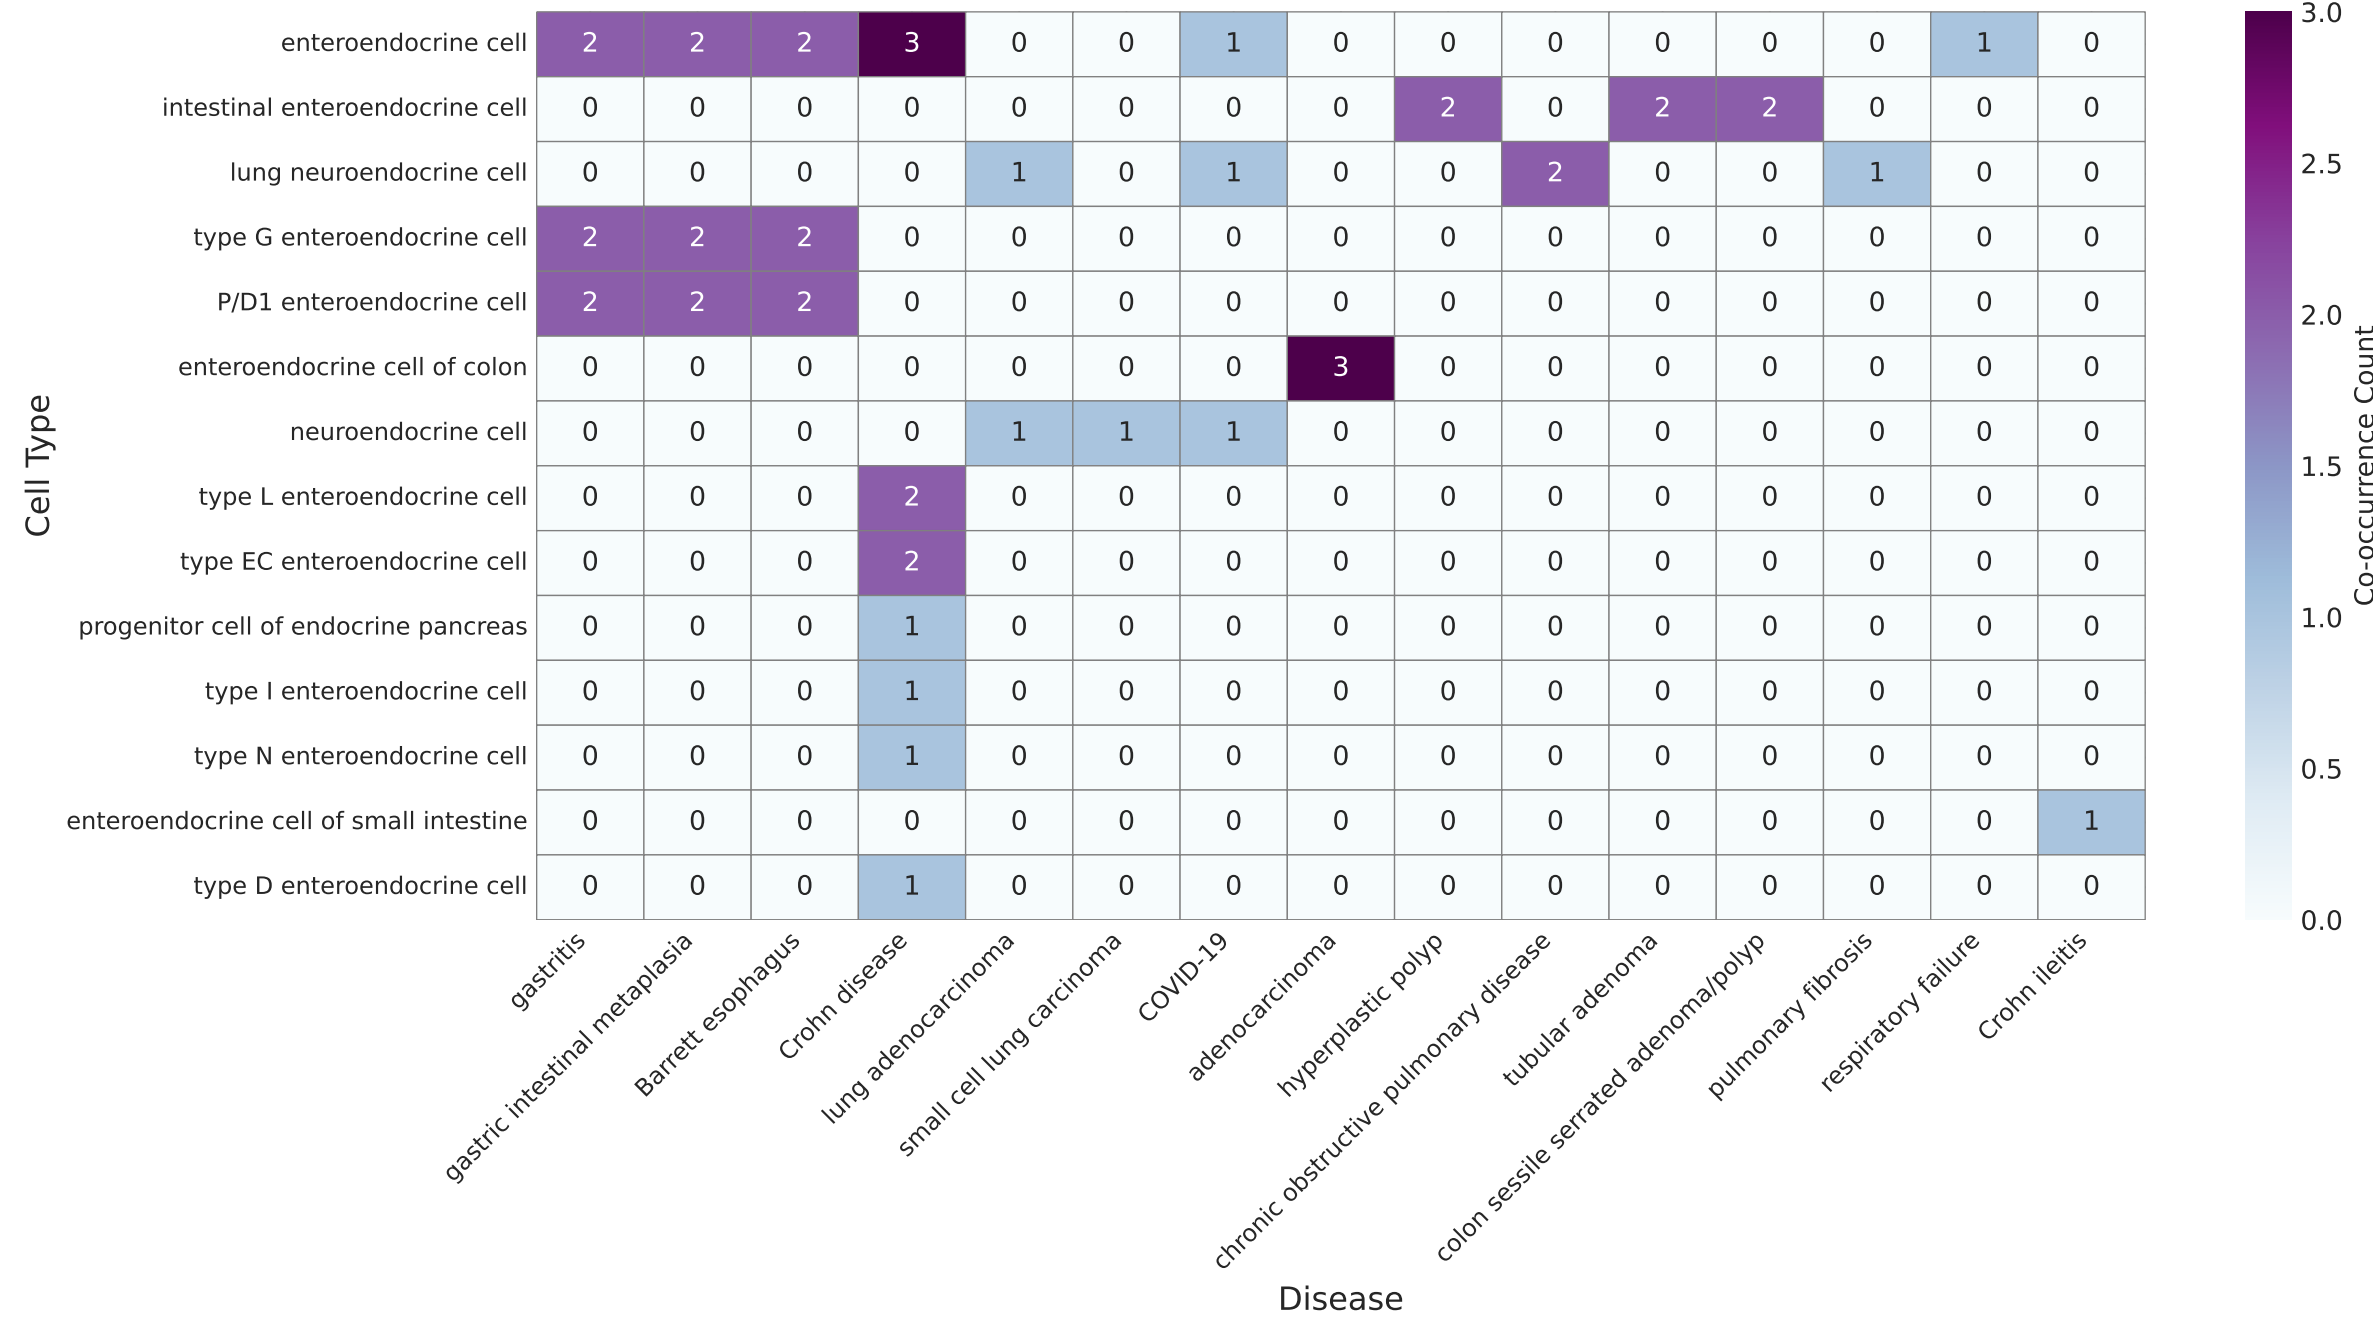

Tissue Category-Disease Distribution (% per Category)

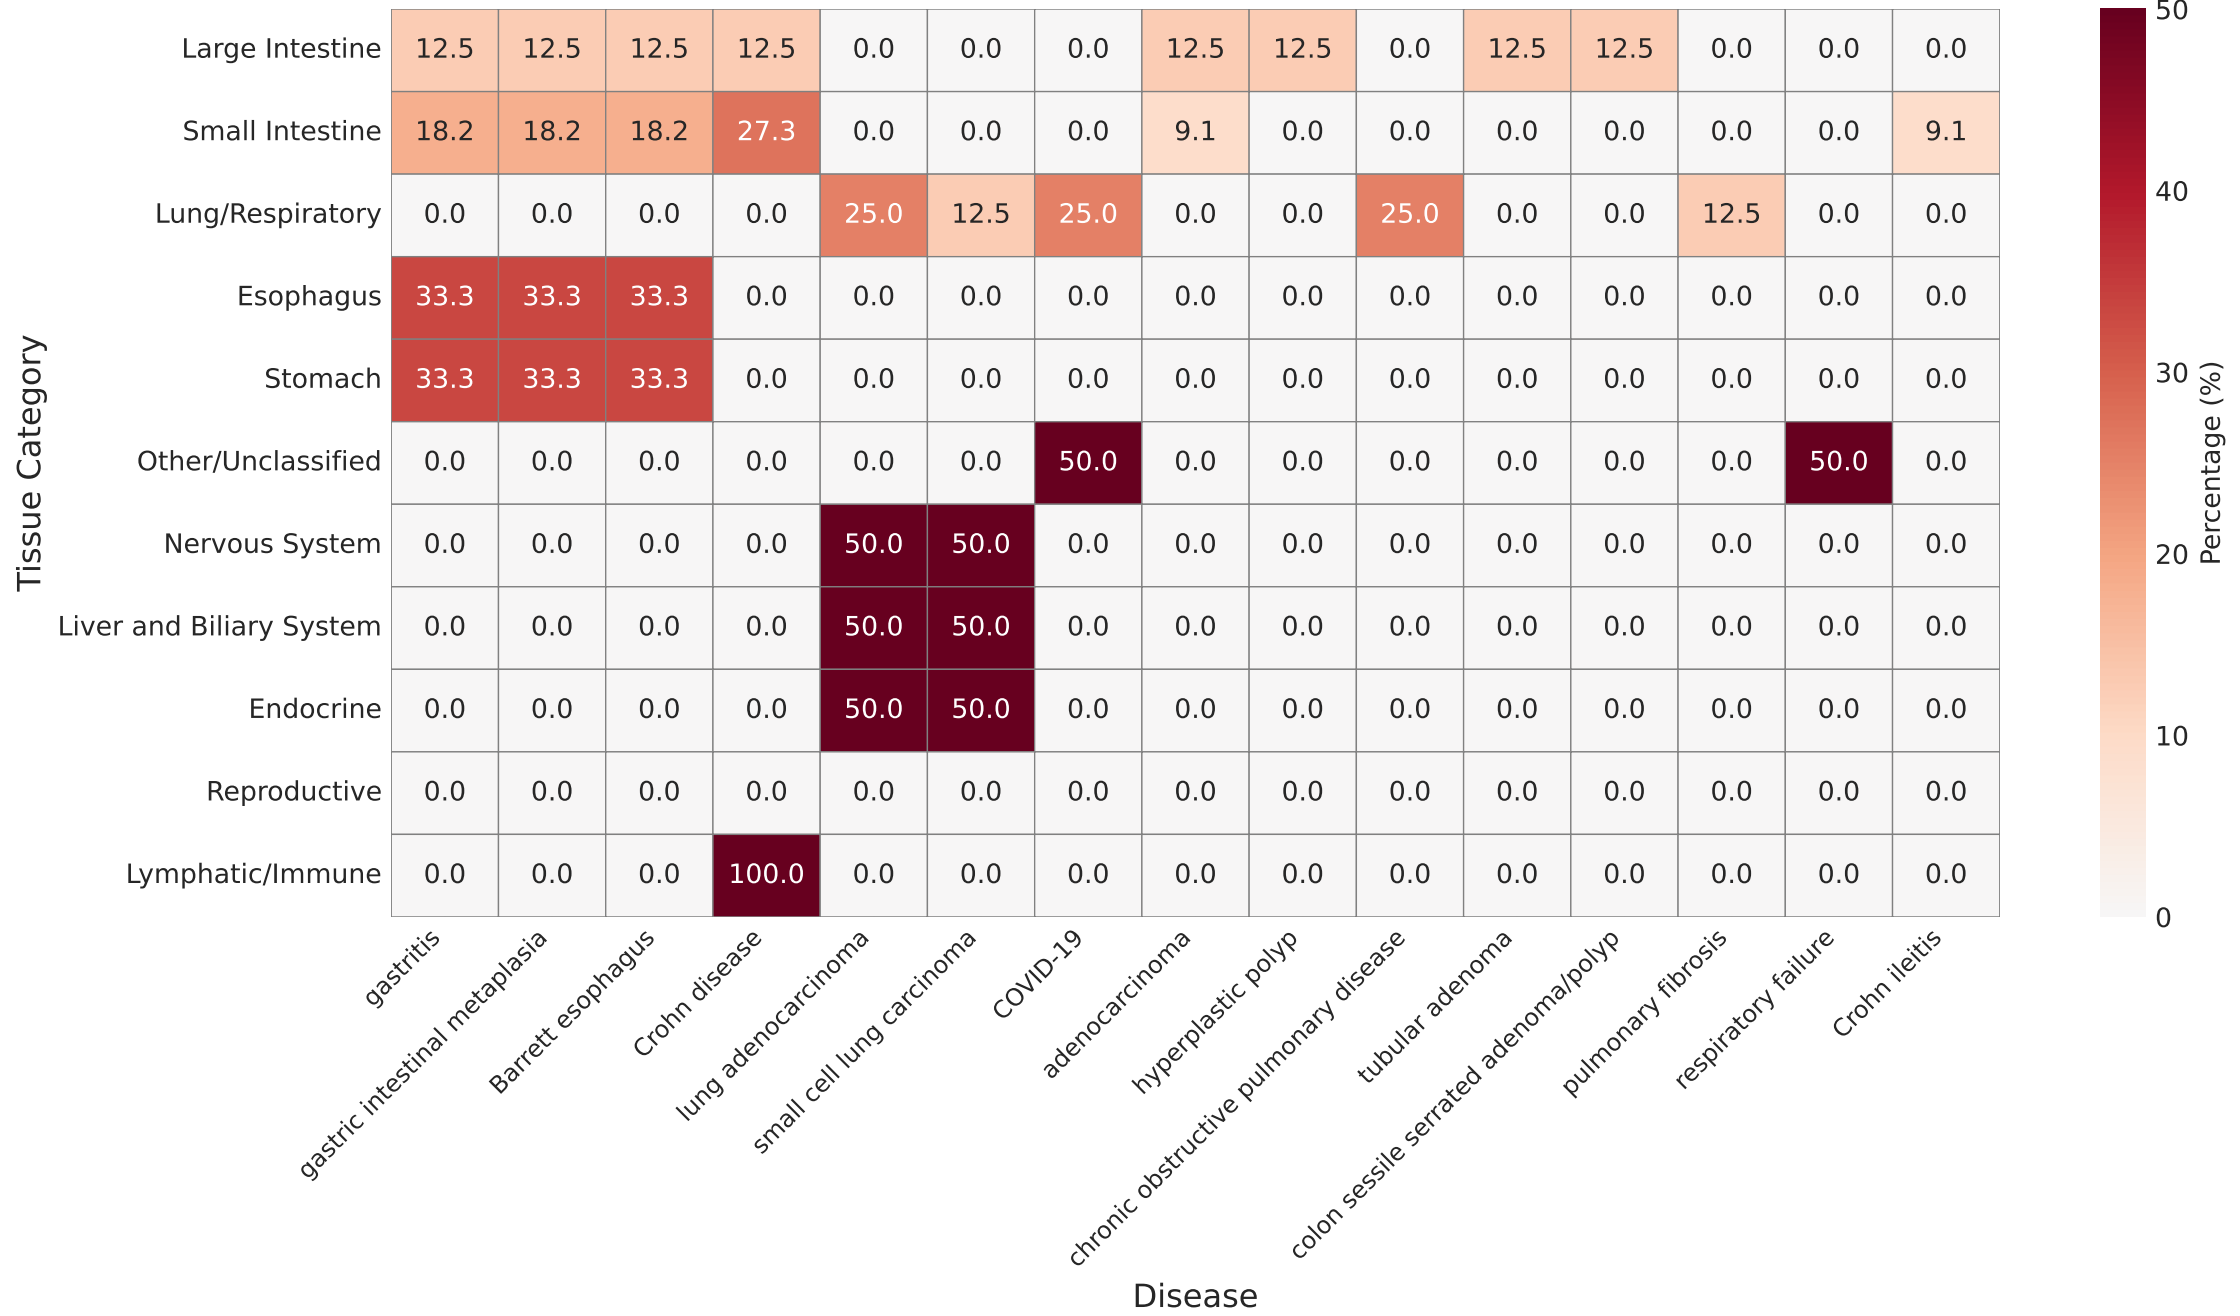

Cell Type-Disease Distribution (% per Cell Type)

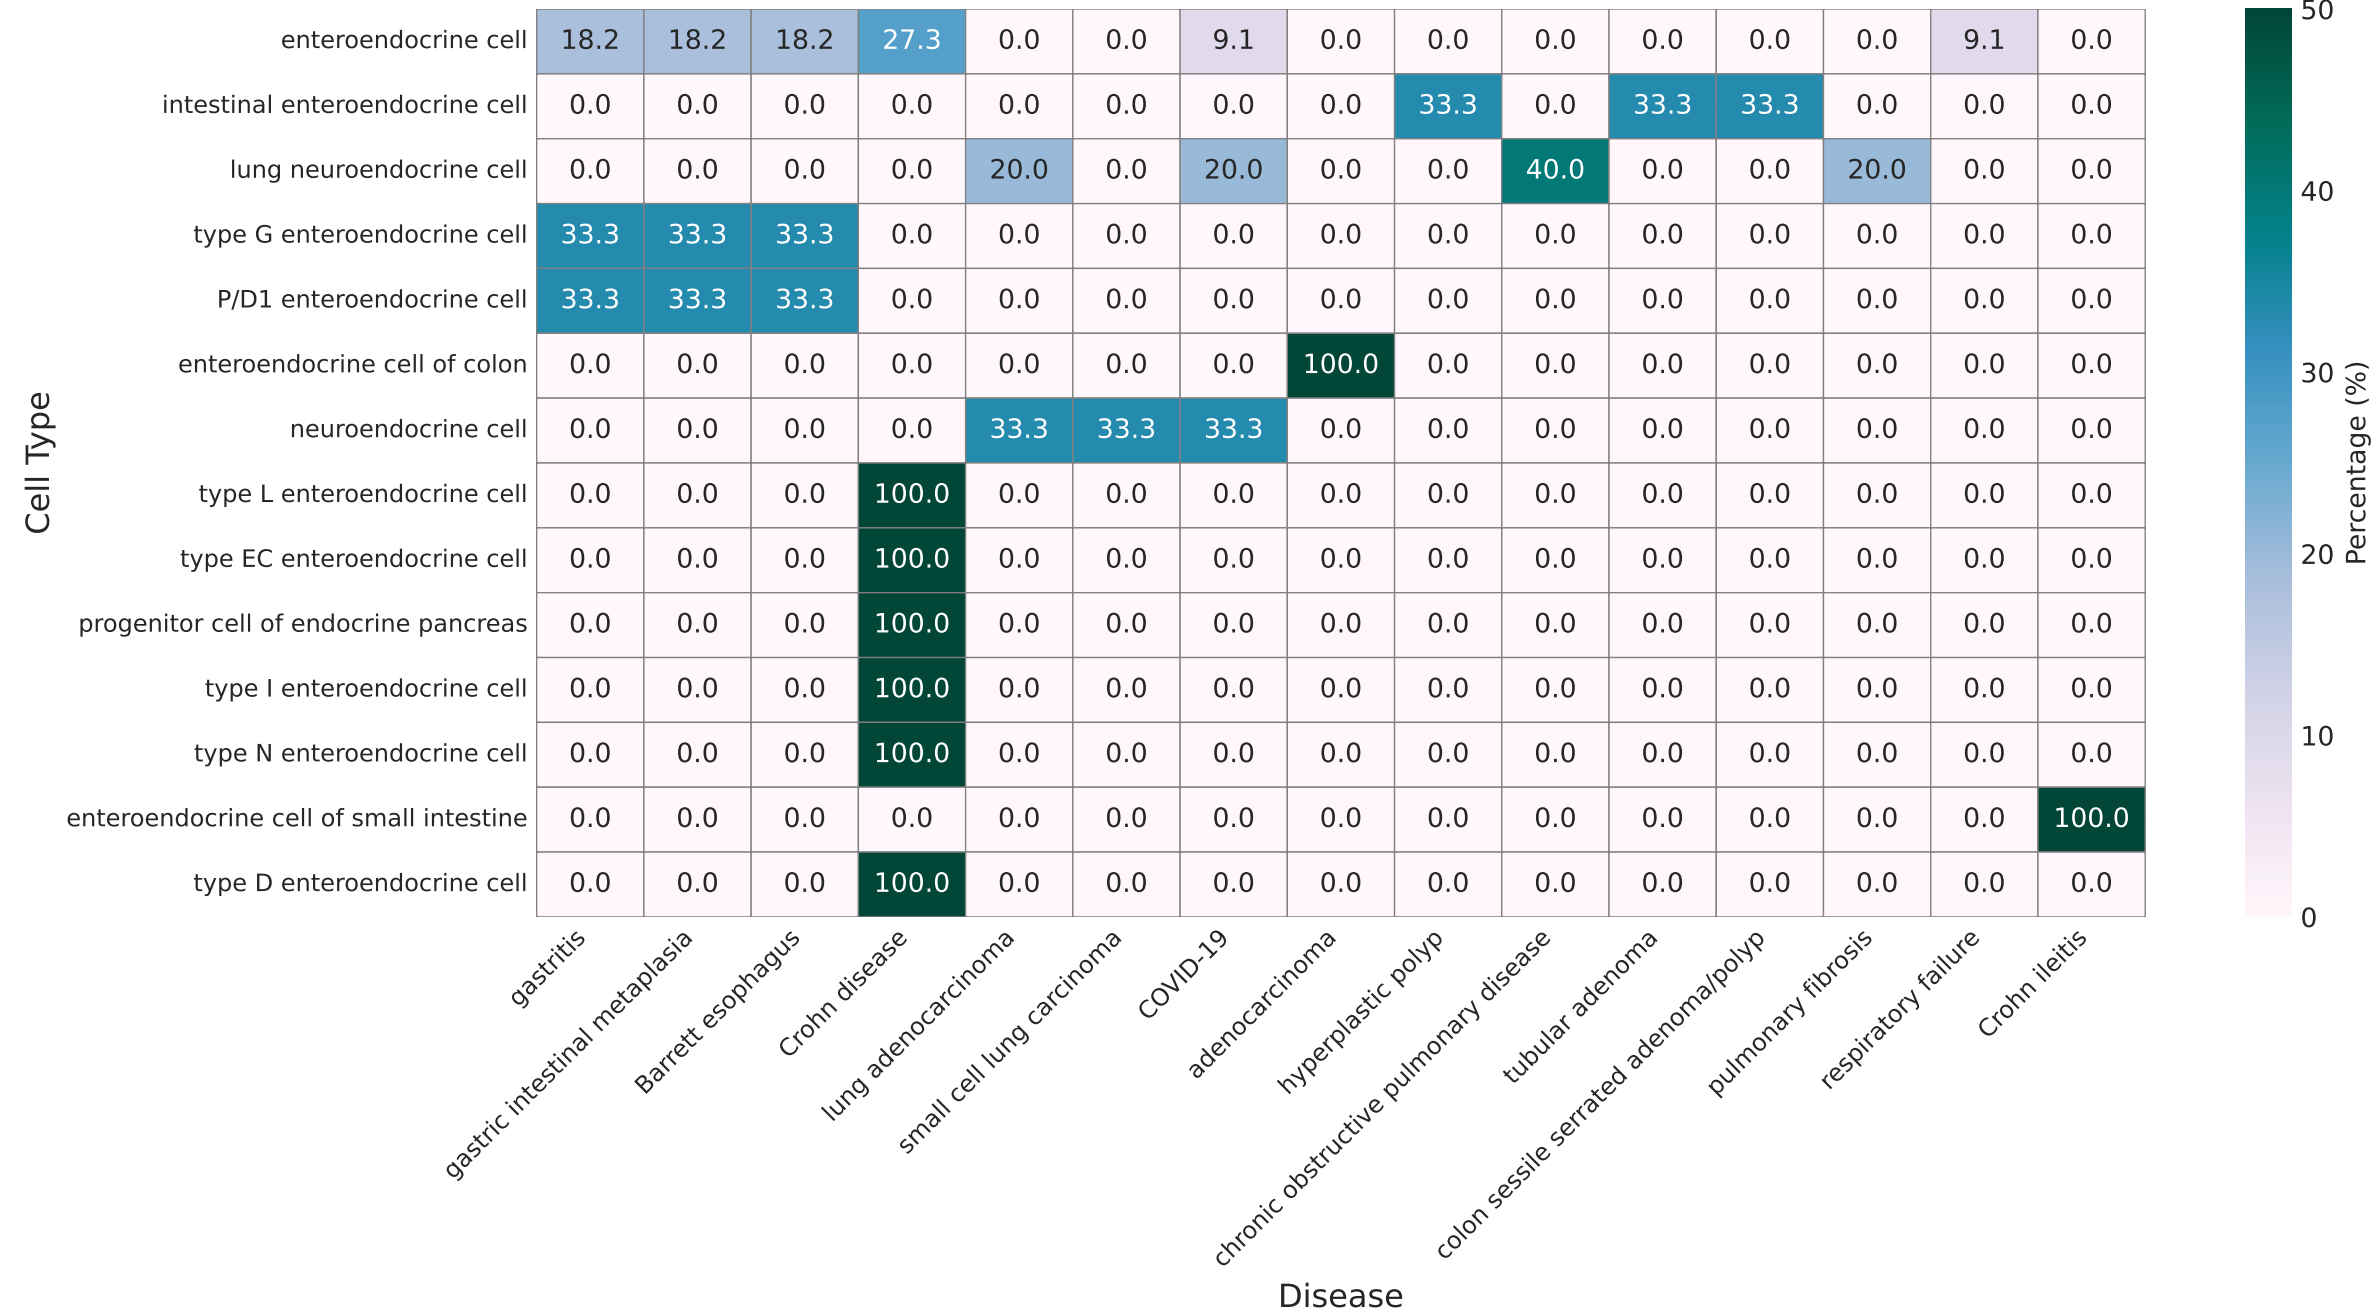

Cell Type-Tissue Category Co-occurrence Matrix

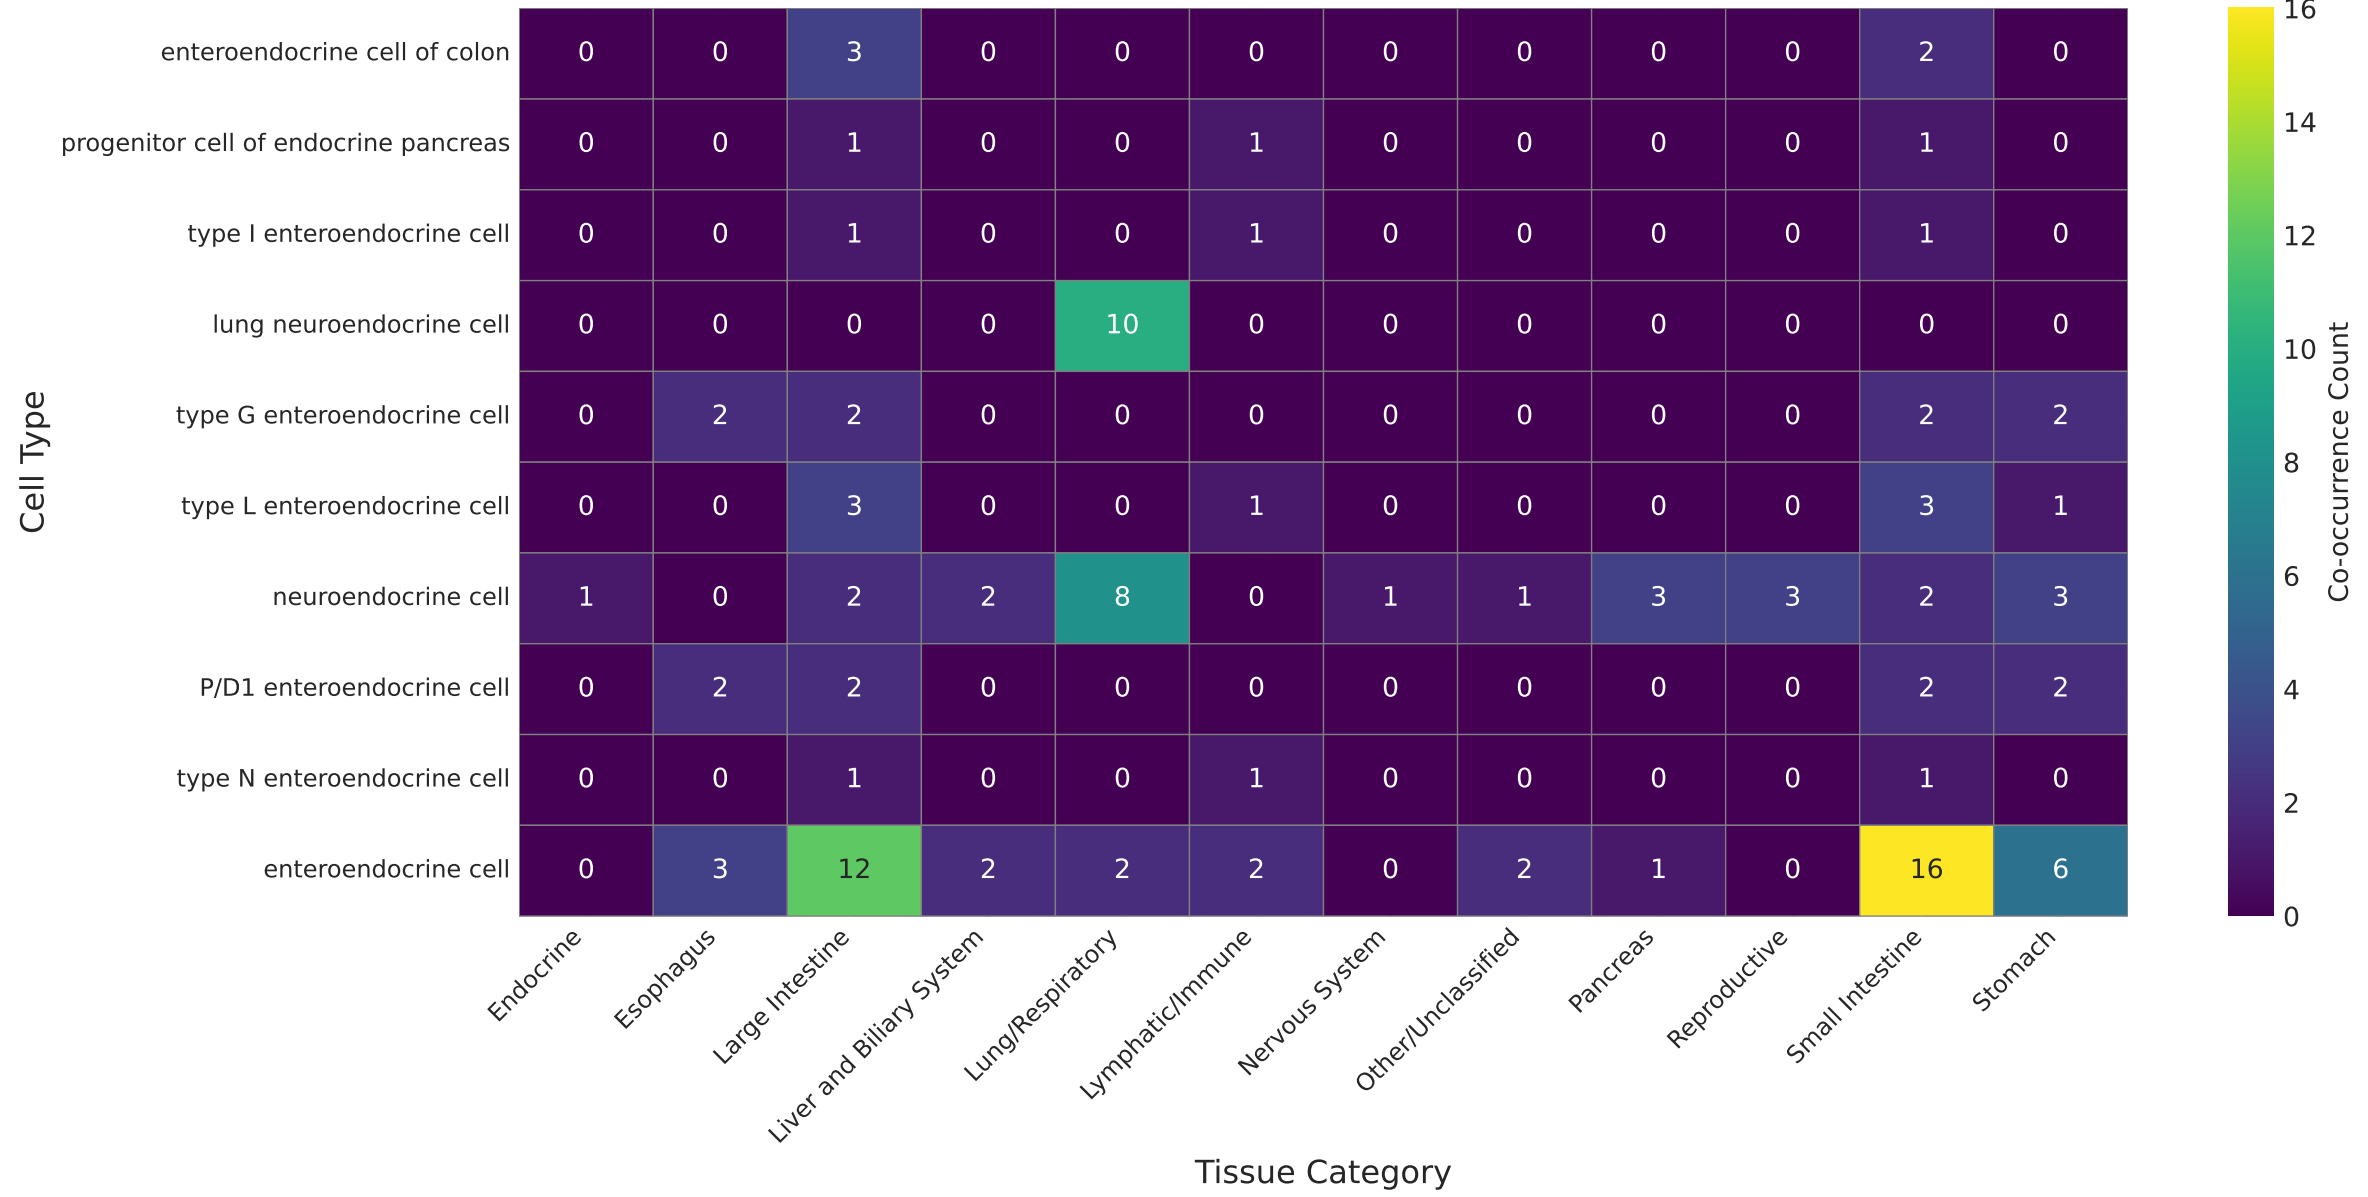

Cell Type-Tissue Category Distribution (% per Cell Type)

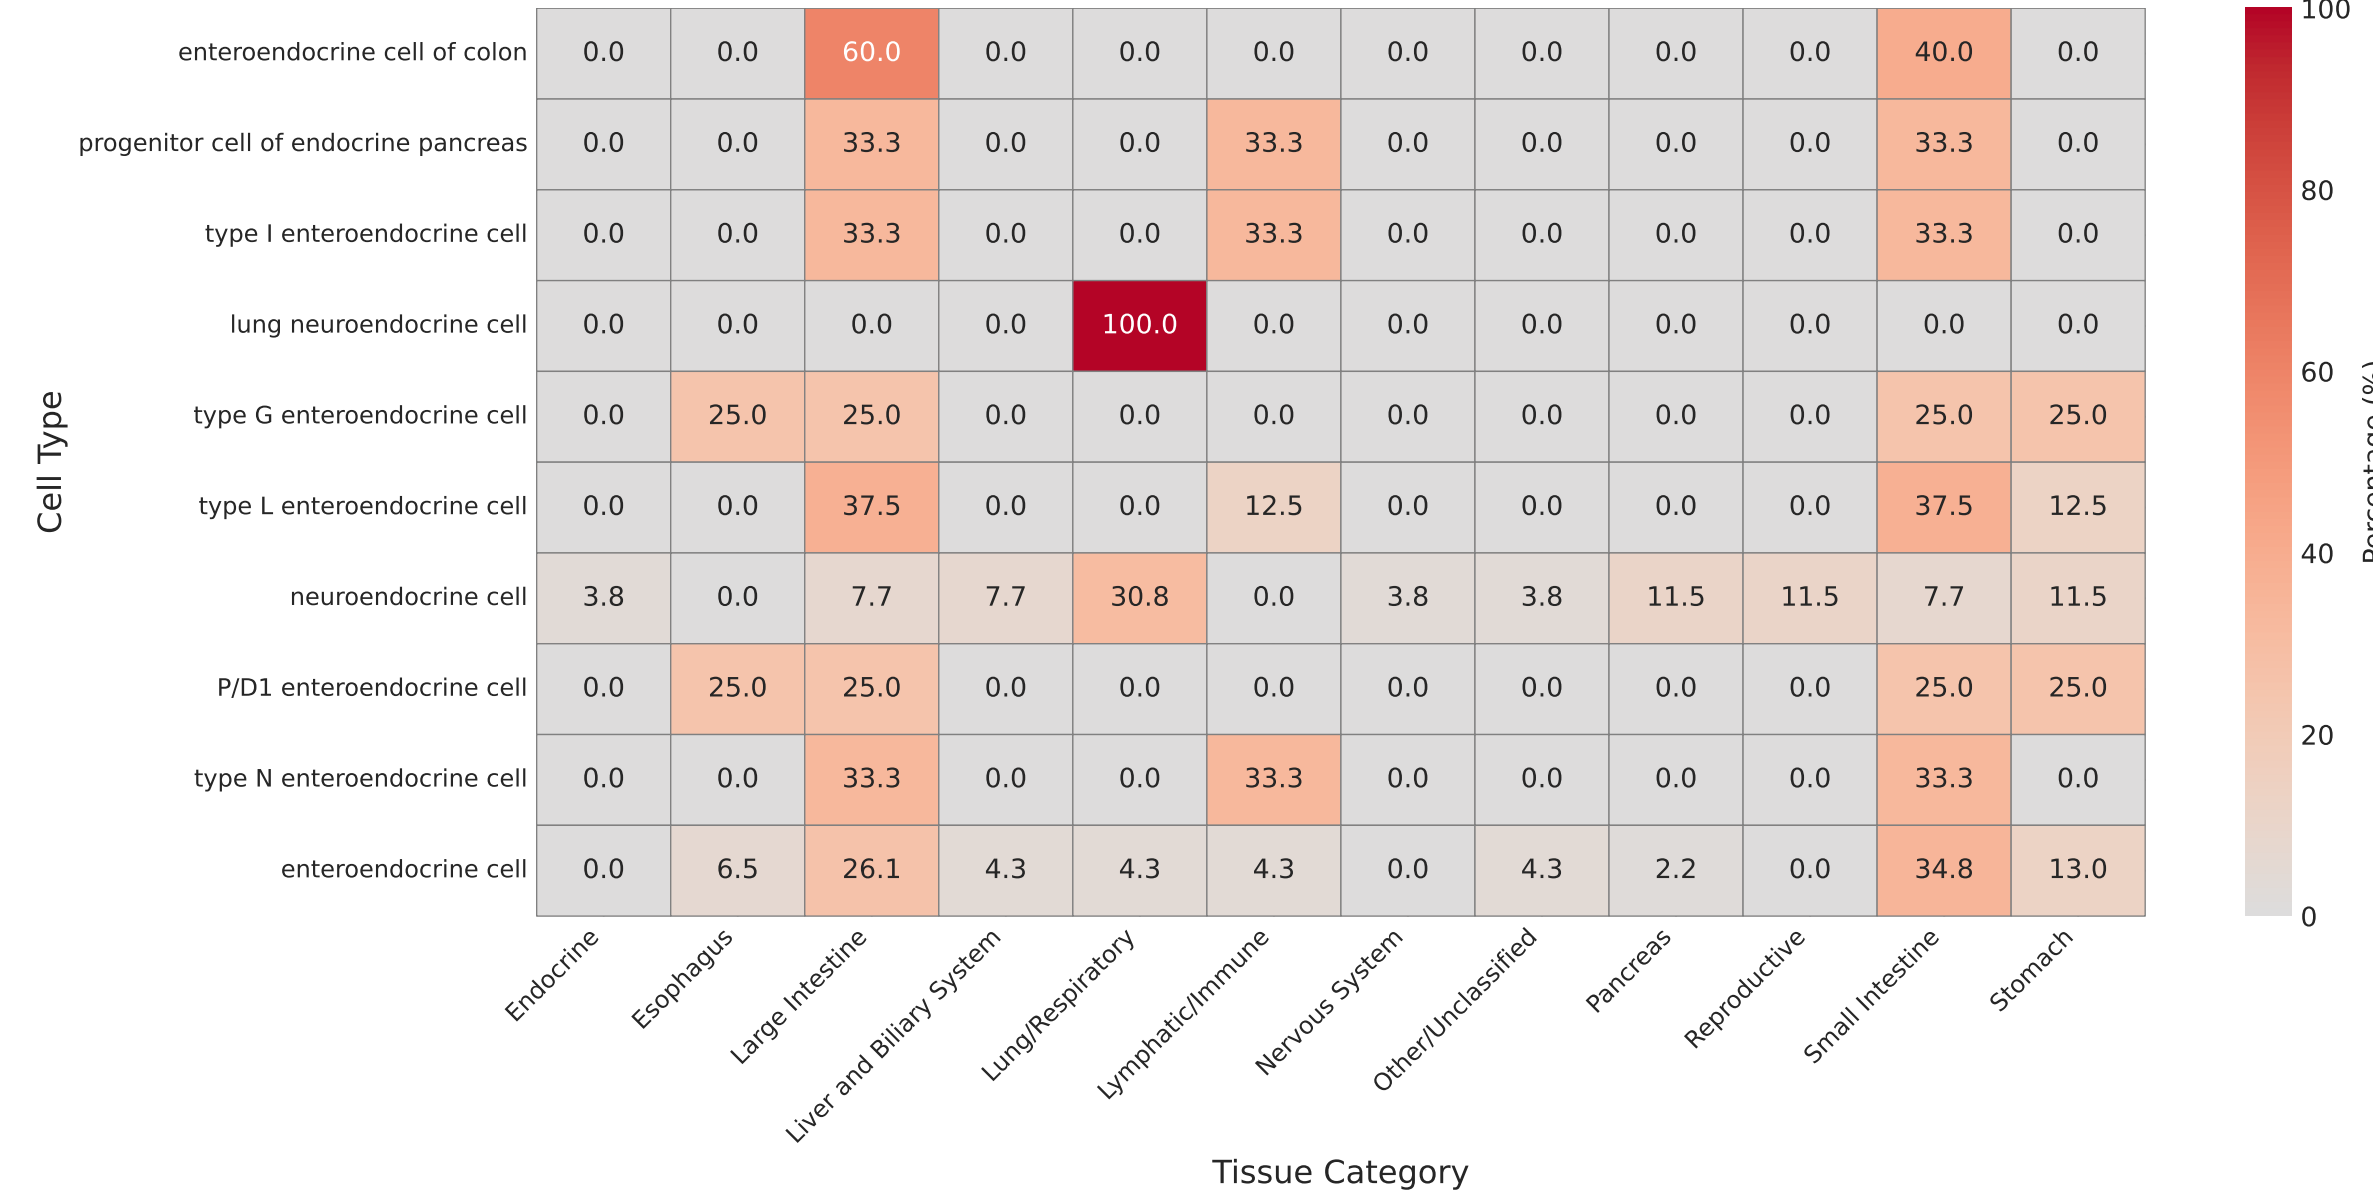

Supplement: supplementary_material [file mapped_cooccurrence_heatmaps.pdf › metadata/mapped_cooccurrence_heatmaps.pdf]
