# Supplementary material
Source: ML conference proceedings conference paper supplement (https://openreview.net/forum?id=h40Nyr36om)

Network Communities (Louvain Algorithm)

Top Communities by Size

- Community 2 (n= 44 )
- Community 3 (n= 19 )
- Community 4 (n= 11 )
- Community 7 (n= 9 )
- Community 12 (n= 6 )
- Community 1 (n= 5 )
- Community 10 (n= 5 )
- Community 6 (n= 4 )
- Community 15 (n= 4 )
- Community 8 (n= 3 )

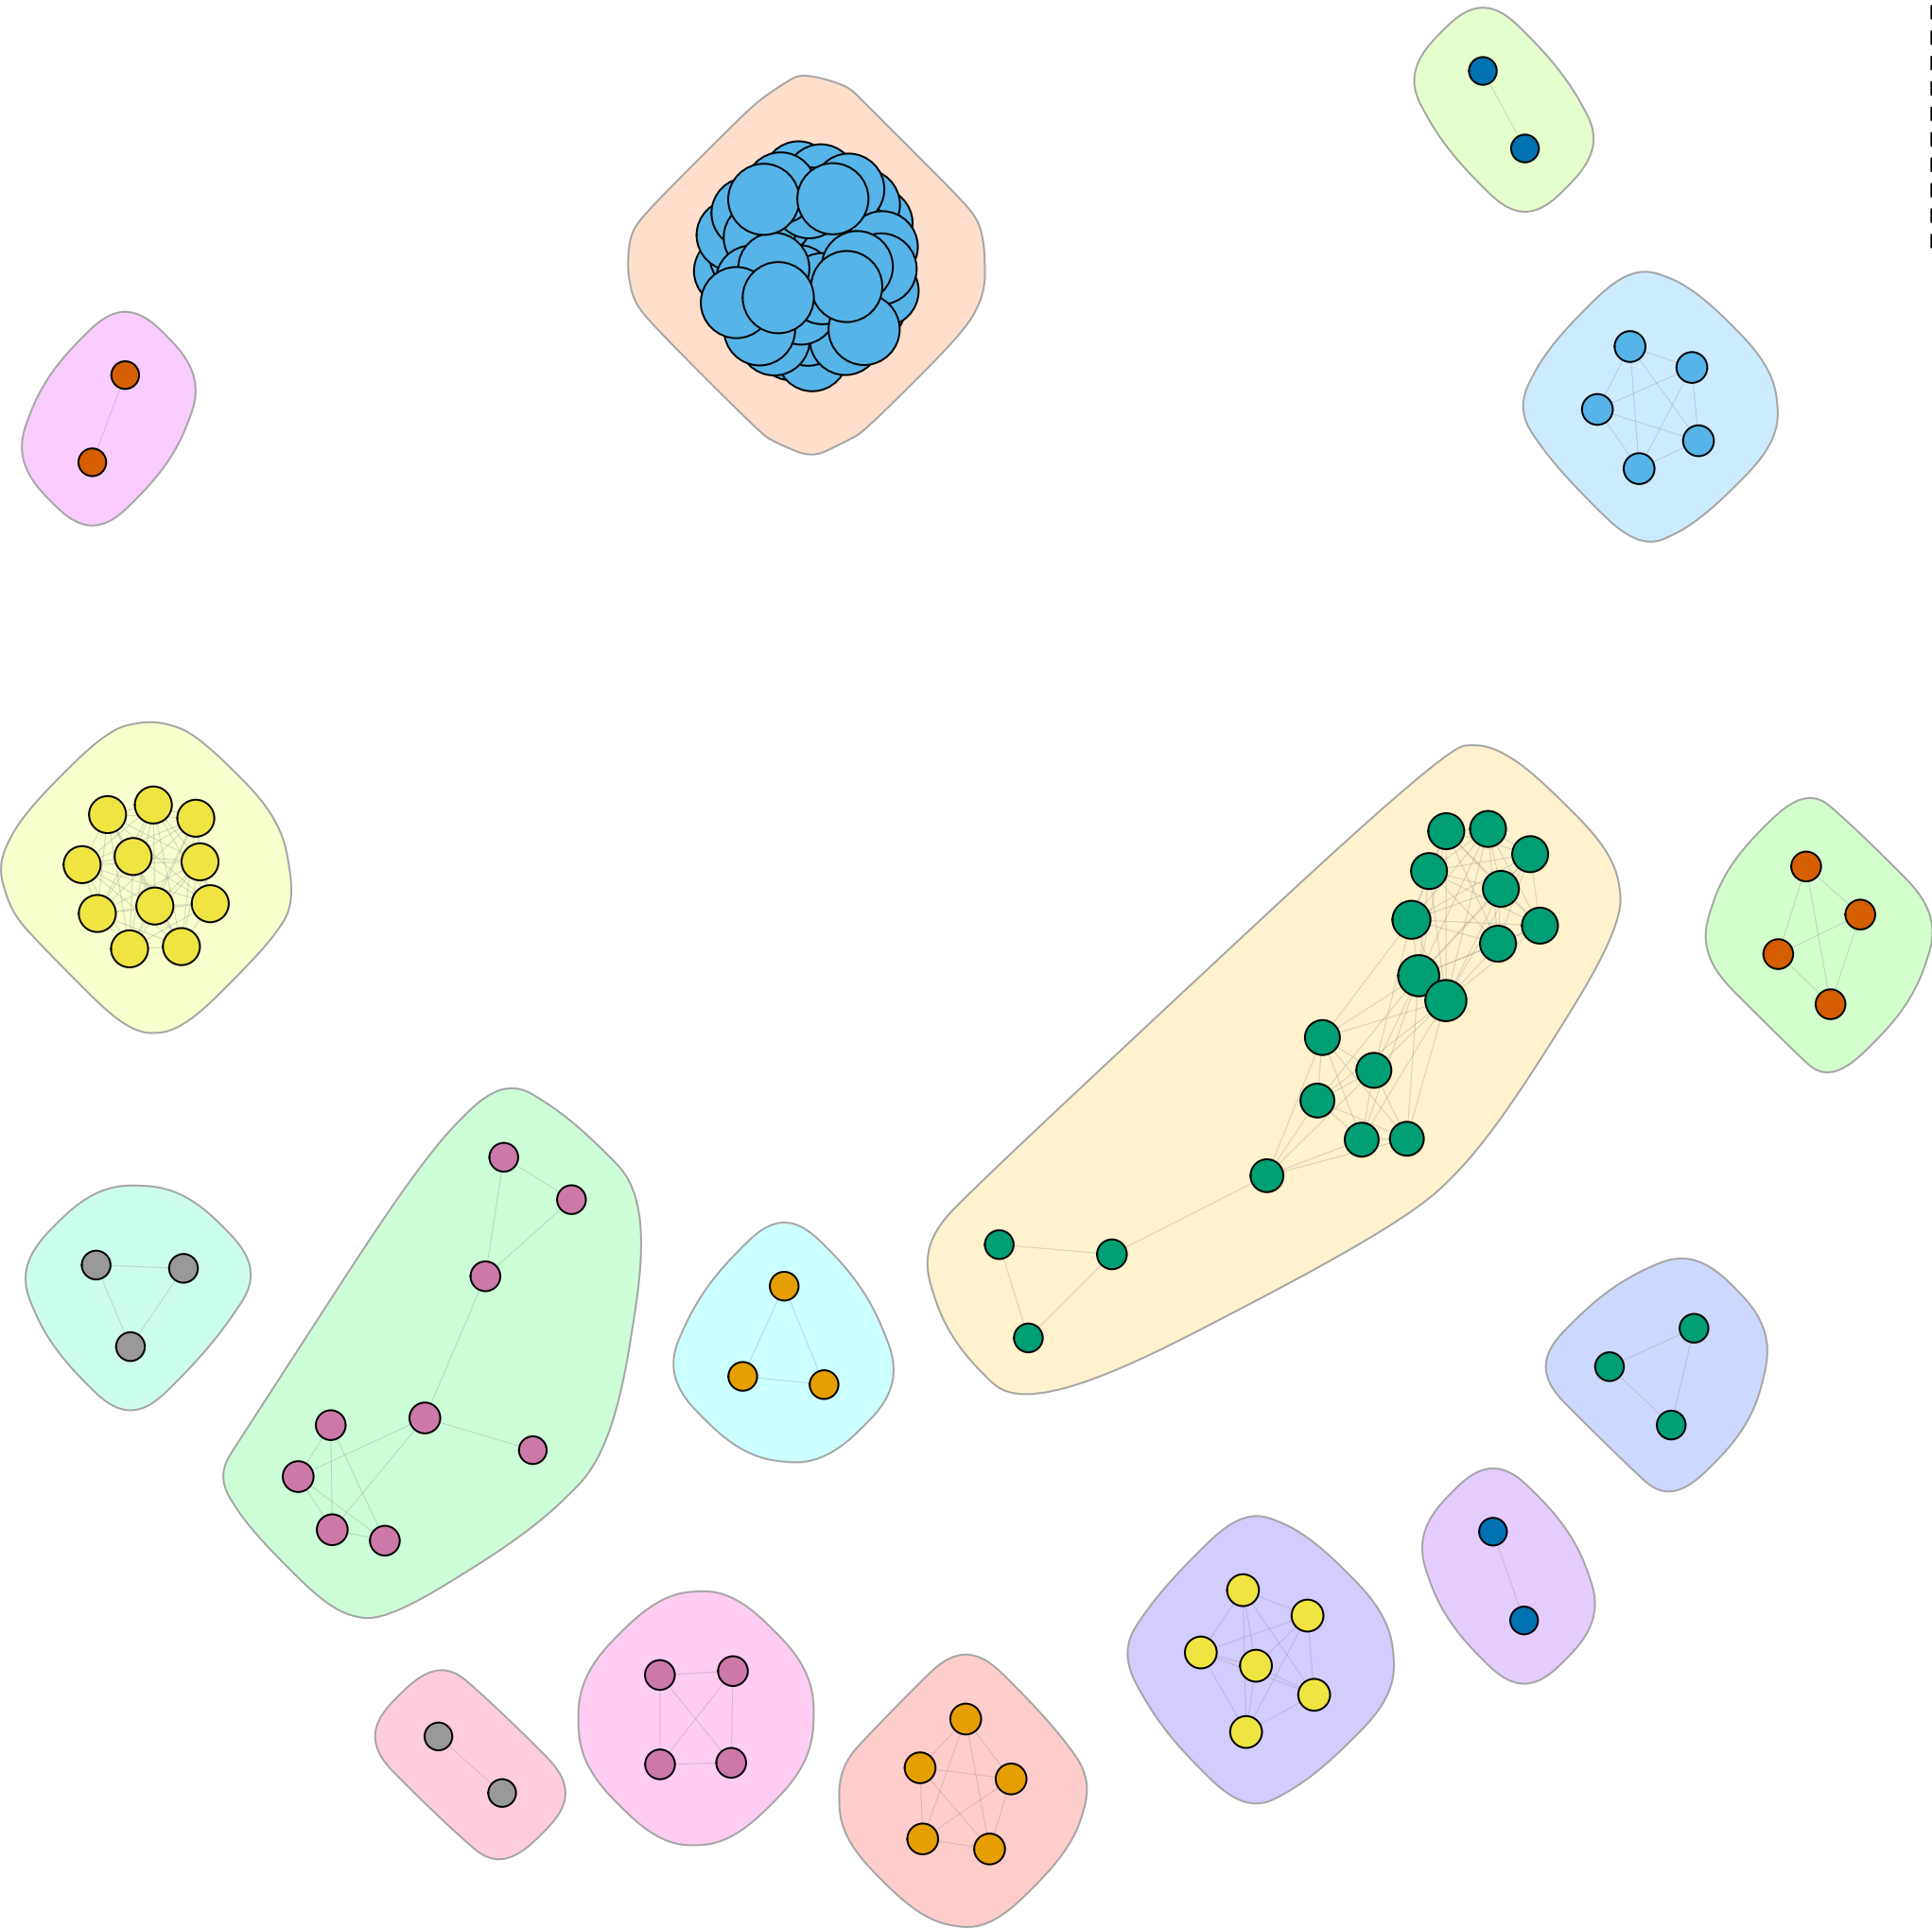

Supplement: supplementary_material [file network_communities.pdf › covarnet/network_communities.pdf]
