# Supplementary material
Source: ML conference proceedings conference paper supplement (https://openreview.net/forum?id=h40Nyr36om)

Annotated Network Communities with Endocrine Highlights

- Communities (E: Endocrine count)
- C1 (n=5): 1
  - C2 (n=44): 4
  - C3 (n=19): 4
  - C4 (n=11): 3
  - C5 (n=2): 1
  - C6 (n=4): 3
  - C7 (n=9): 8
  - C8 (n=3): 1

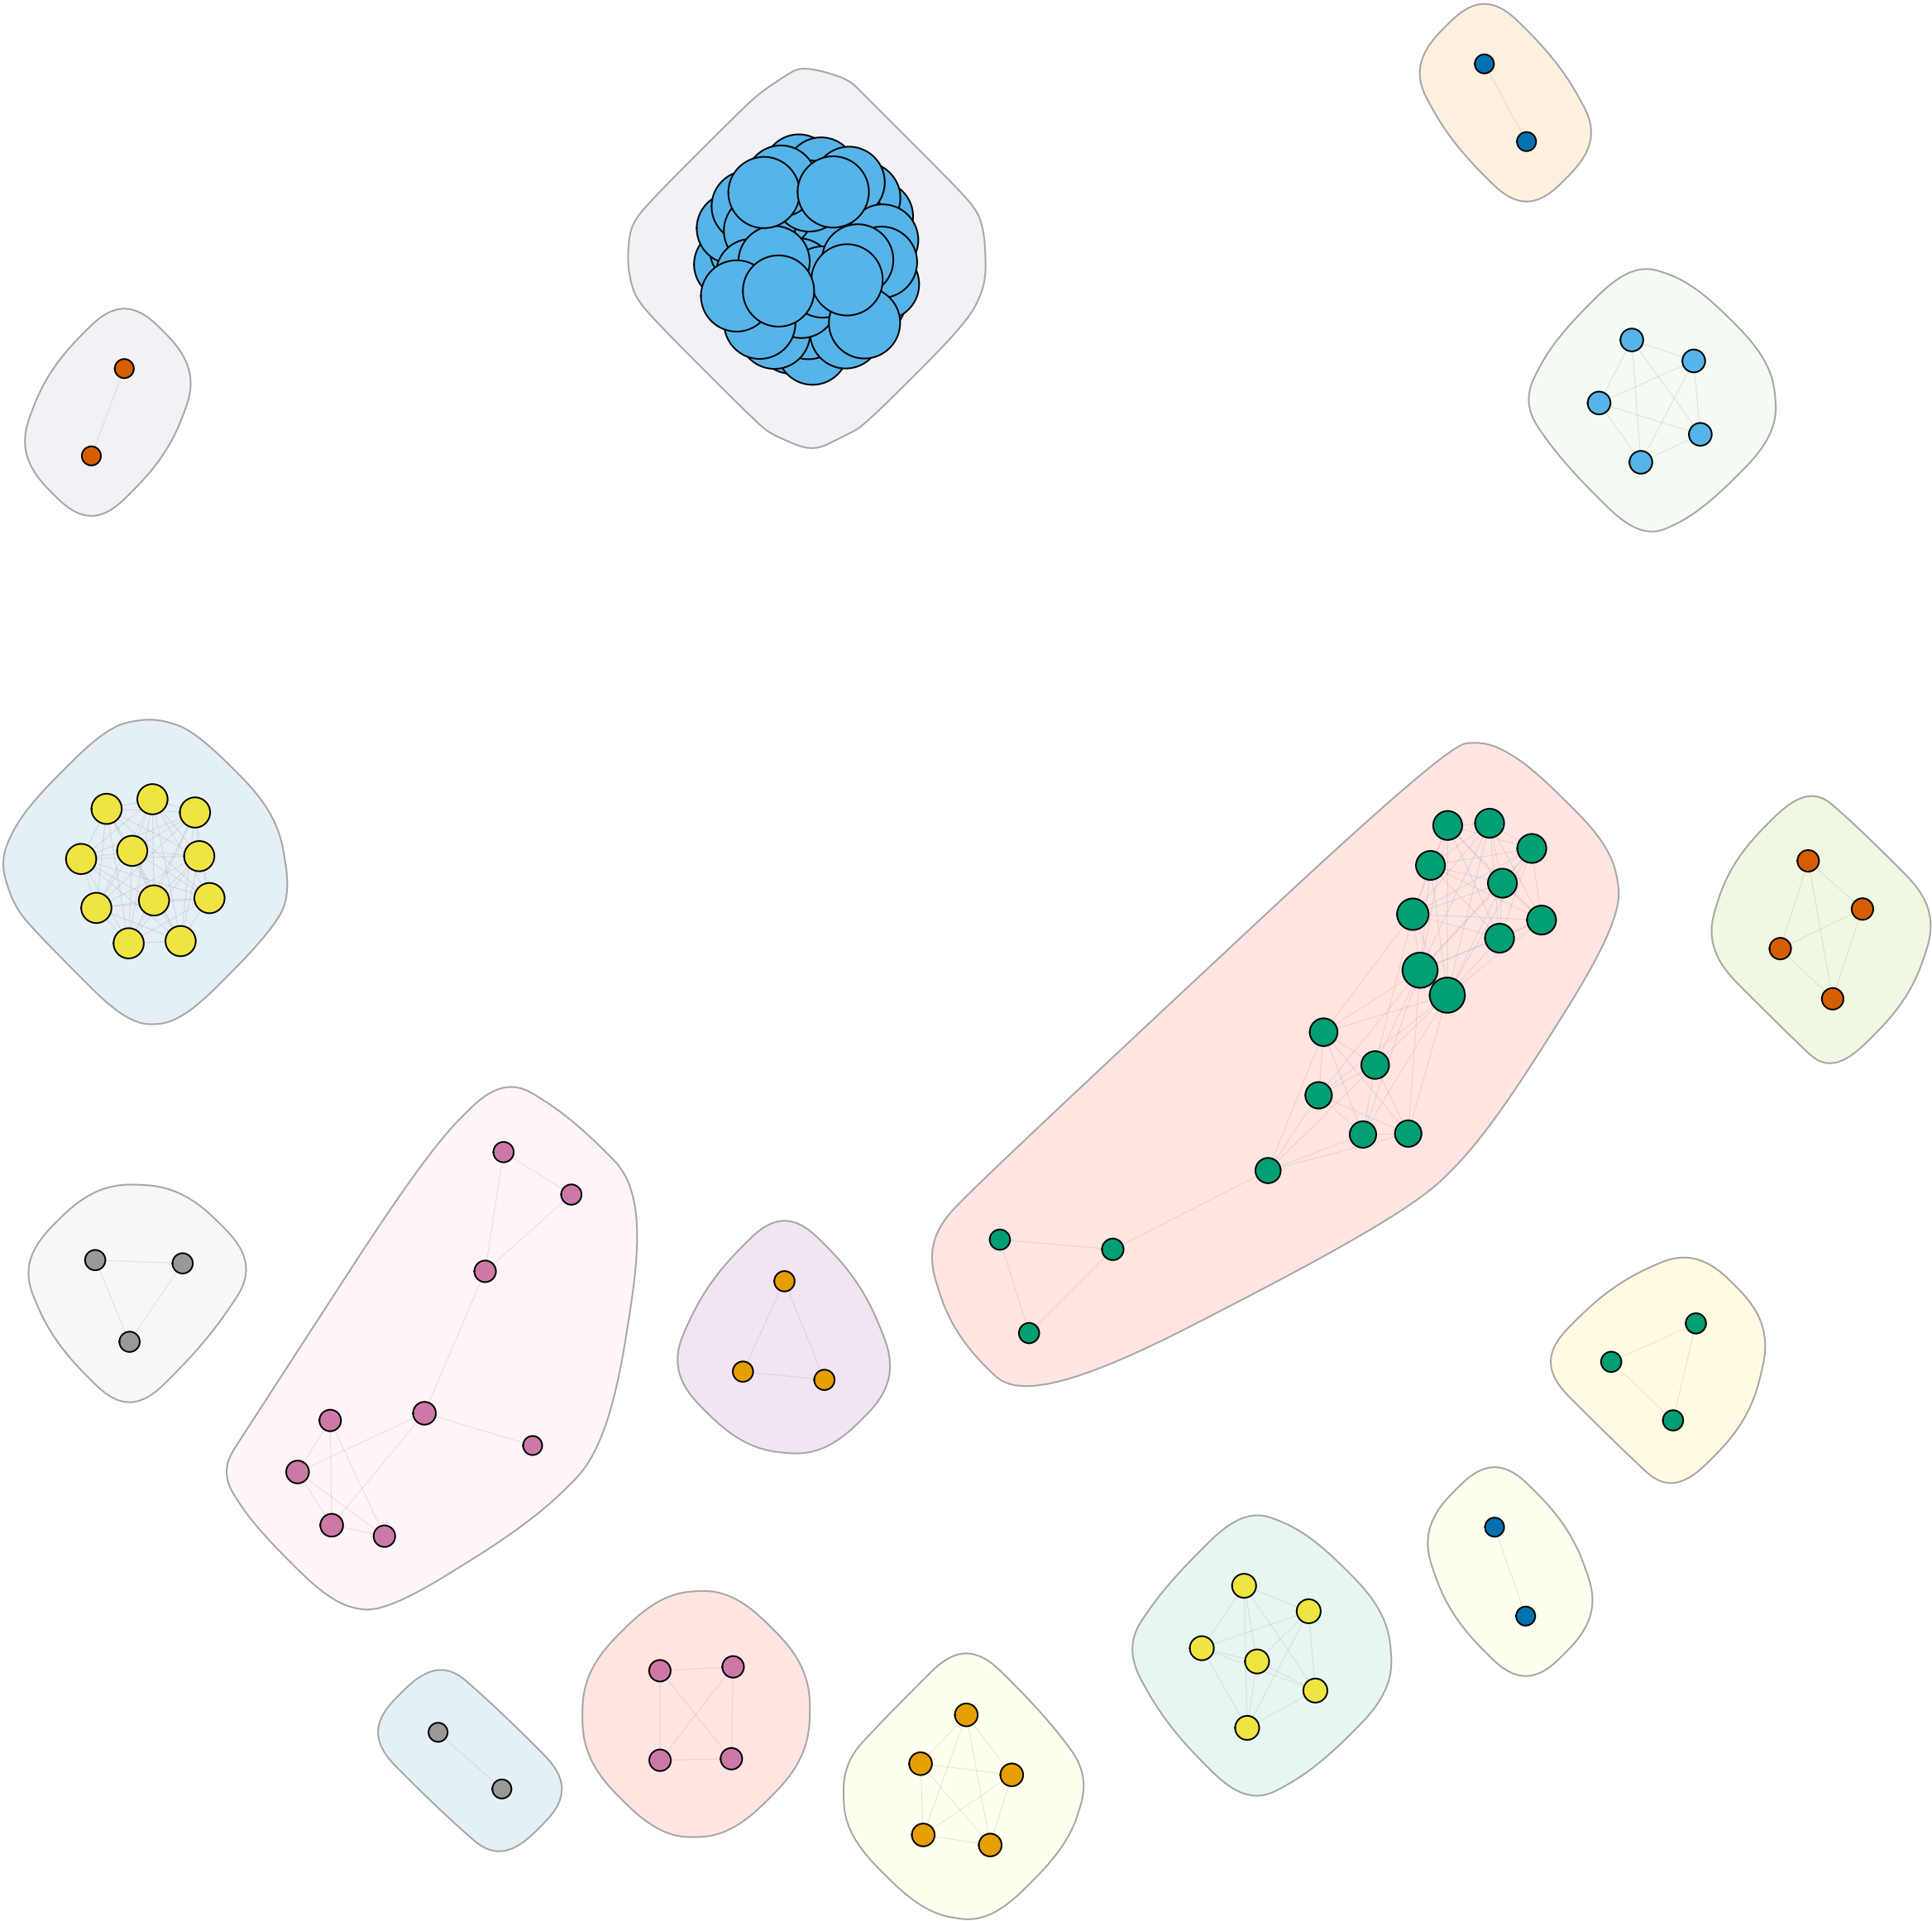

Supplement: supplementary_material [file network_communities_annotated.pdf › covarnet/network_communities_annotated.pdf]
