# Supplementary material
Source: ML conference proceedings conference paper supplement (https://openreview.net/forum?id=h40Nyr36om)

### Endocrine Cell Subnetwork (Alternative Layout – Pastel Palette)

- Cell Type Categories
- Endocrine cells
  - Small Intestine
  - Lymphatic/Immune
  - Pancreas
  - Large Intestine
  - Lung/Respiratory
  - Stomach

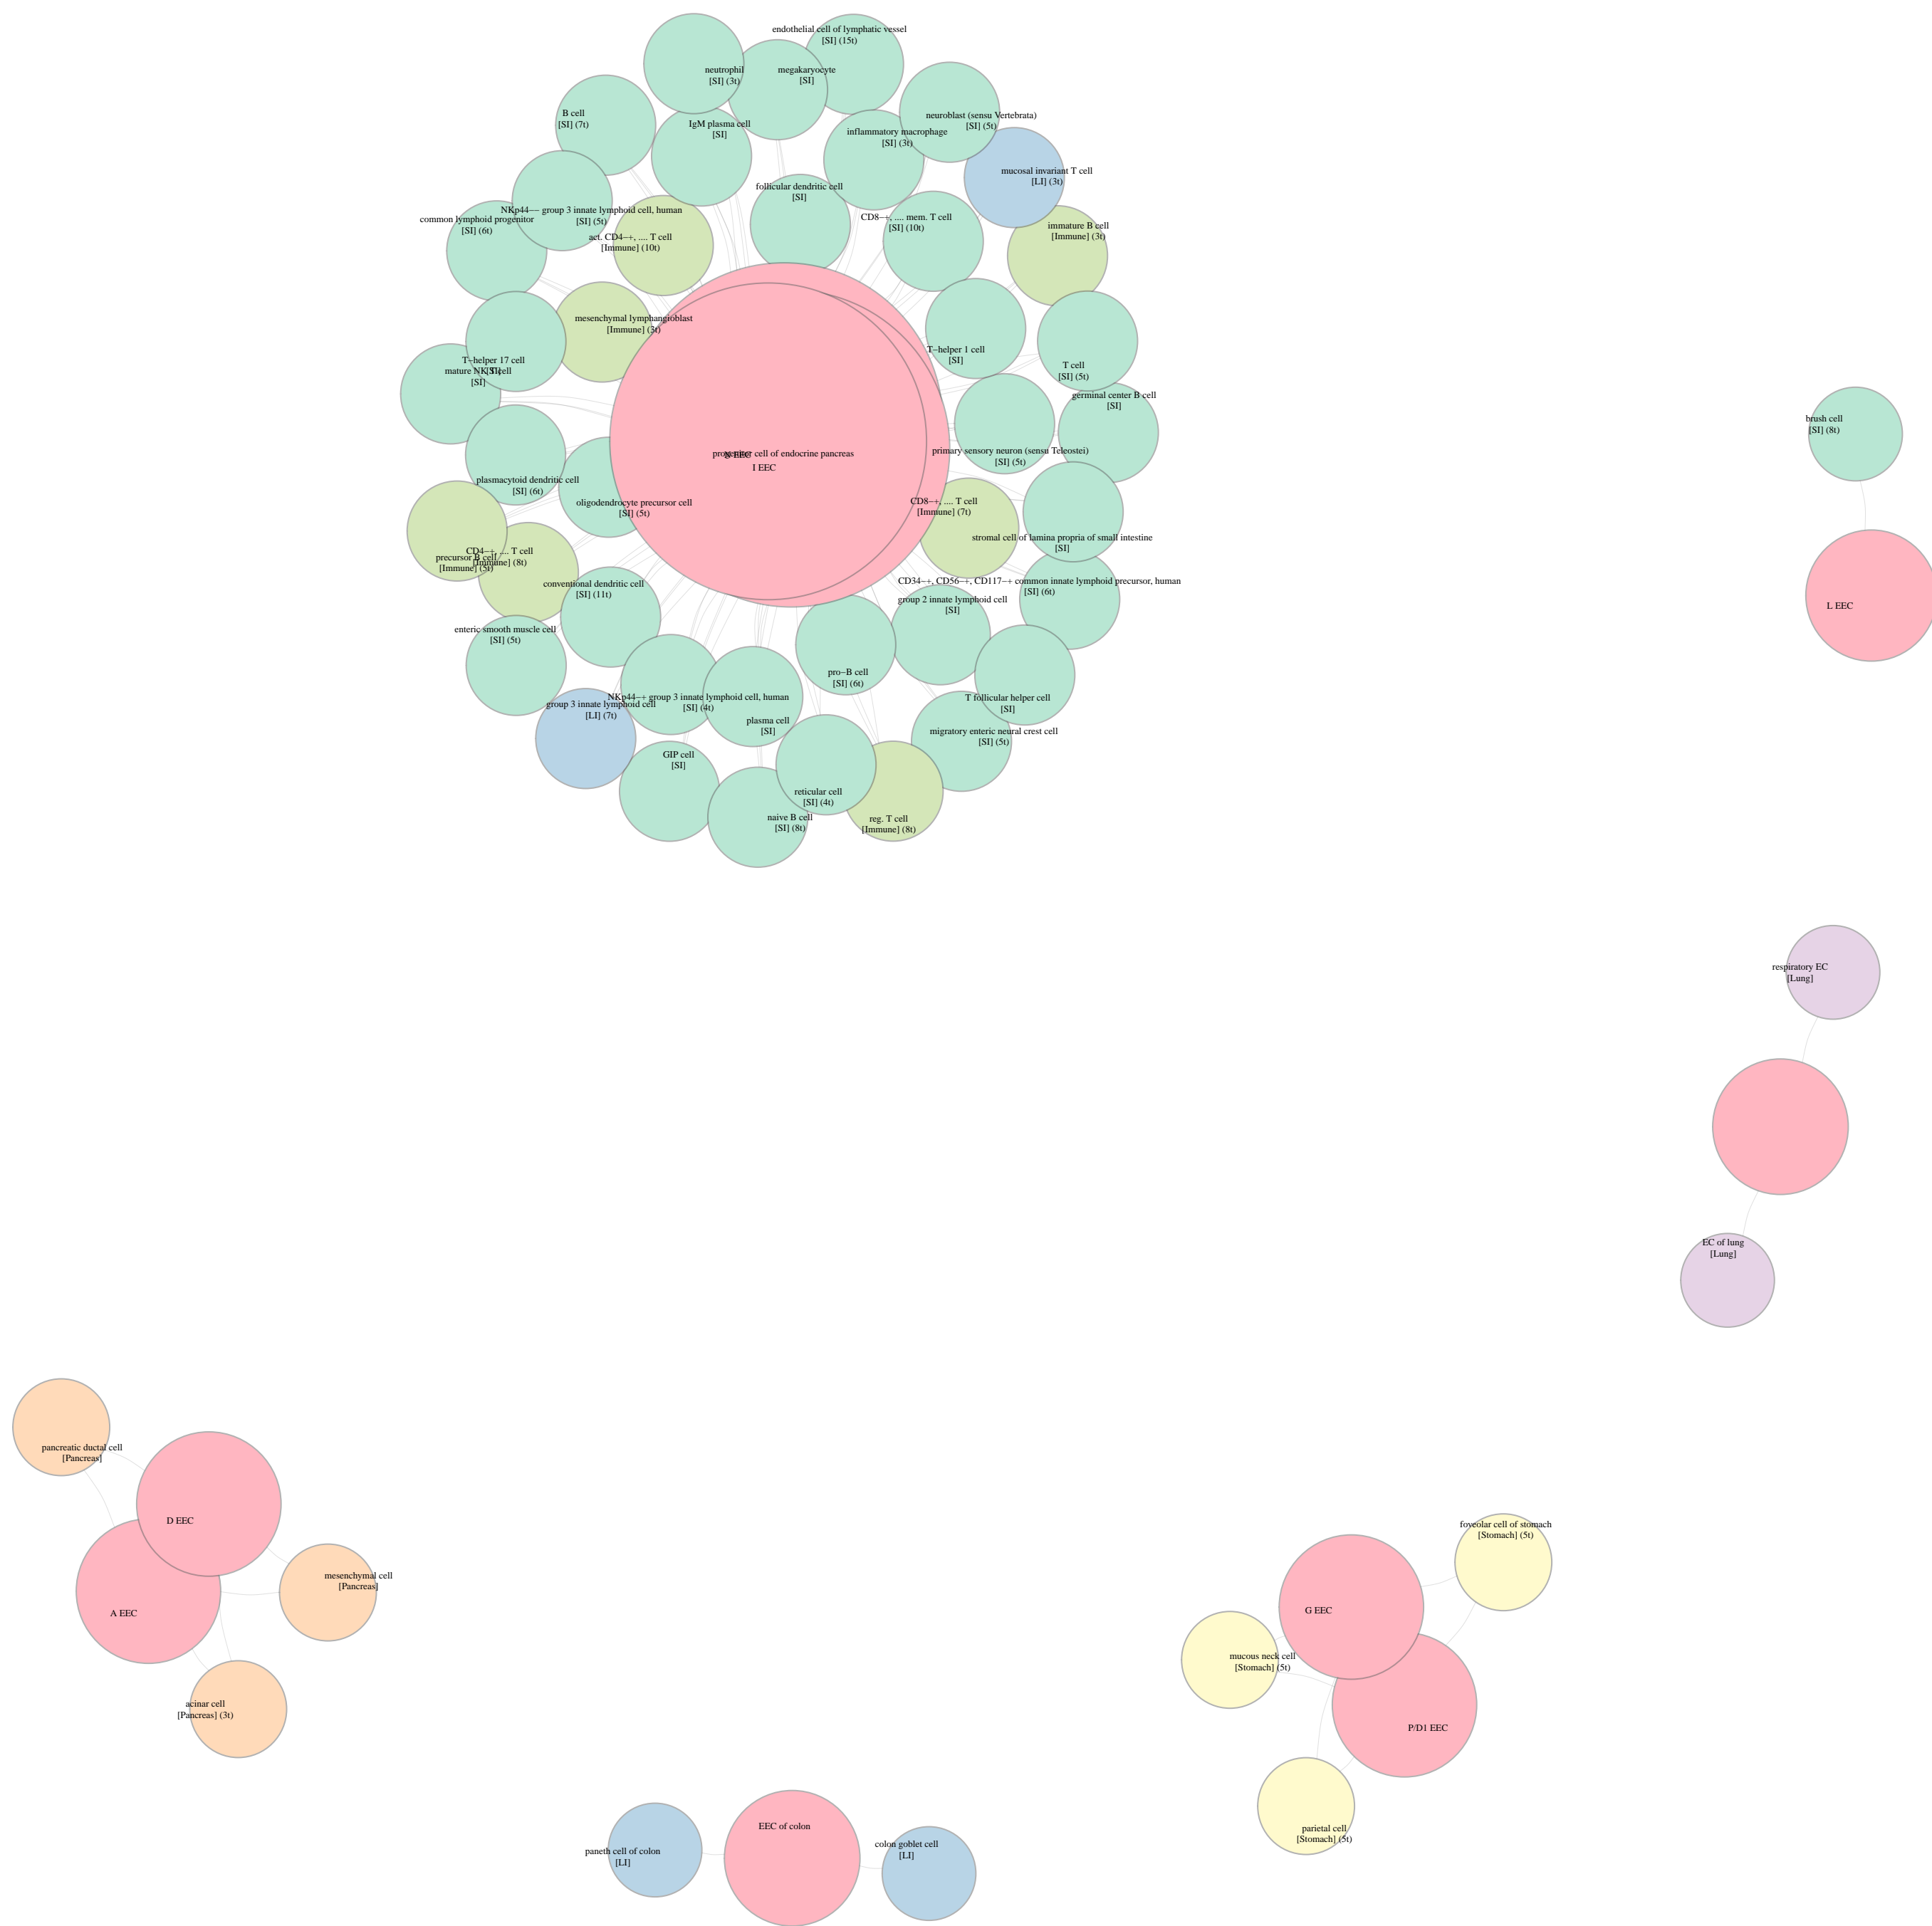

Supplement: supplementary_material [file network_endocrine_tissue_pastel_v2.pdf › covarnet/network_endocrine_tissue_pastel_v2.pdf]
