# Supplementary material
Source: ML conference proceedings conference paper supplement (https://openreview.net/forum?id=h40Nyr36om)

## Global Network: Endocrine Cell Relationships

## Cell Type Groups

- Endocrine
- Epithelial
- Immune
- Stromal
- Endothelial
- Other

### Correlation Strength

- 0.97 – 0.98  
— 0.98 – 0.99  
— 0.99 – 0.99  
— 0.99 – 1.00

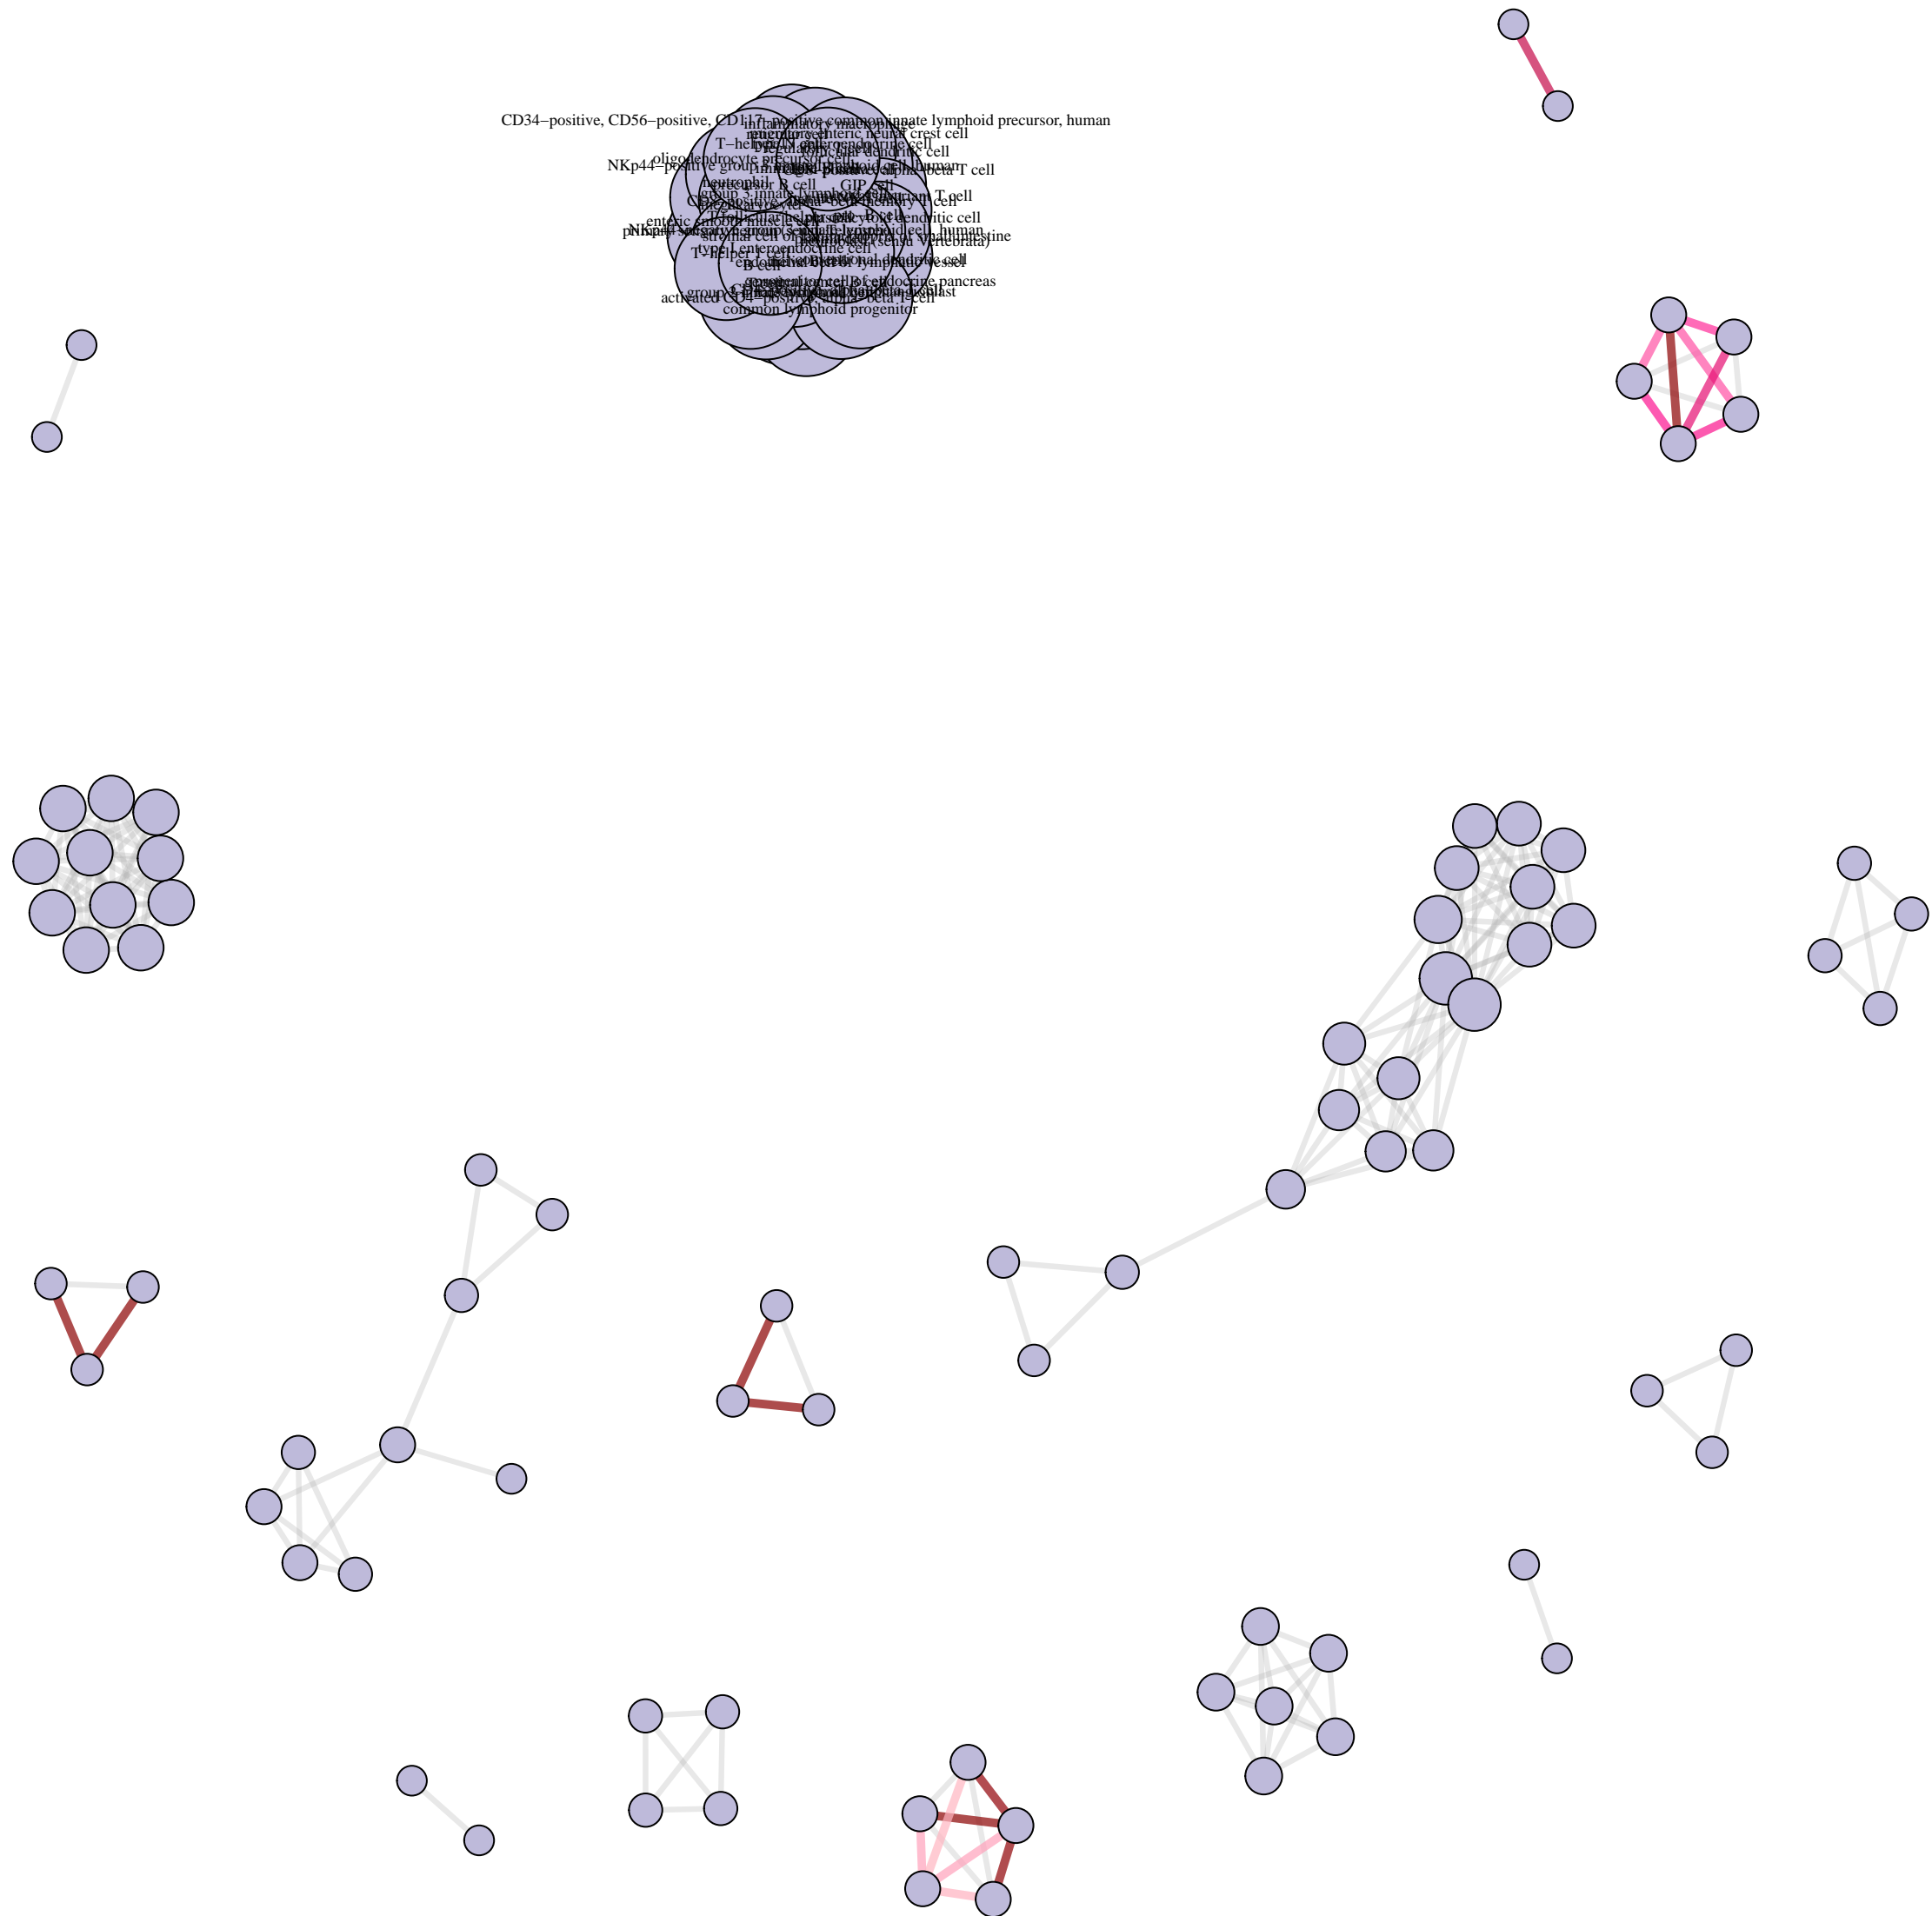

Supplement: supplementary_material [file network_global_endocrine_focus.pdf › covarnet/network_global_endocrine_focus.pdf]
