# Supplementary material
Source: ML conference proceedings conference paper supplement (https://openreview.net/forum?id=h40Nyr36om)

## Simplified Global Network – Major Cell Type Groups

Cell Type Groups

- Immune
- Epithelial
- Endocrine
- Stromal
- Other

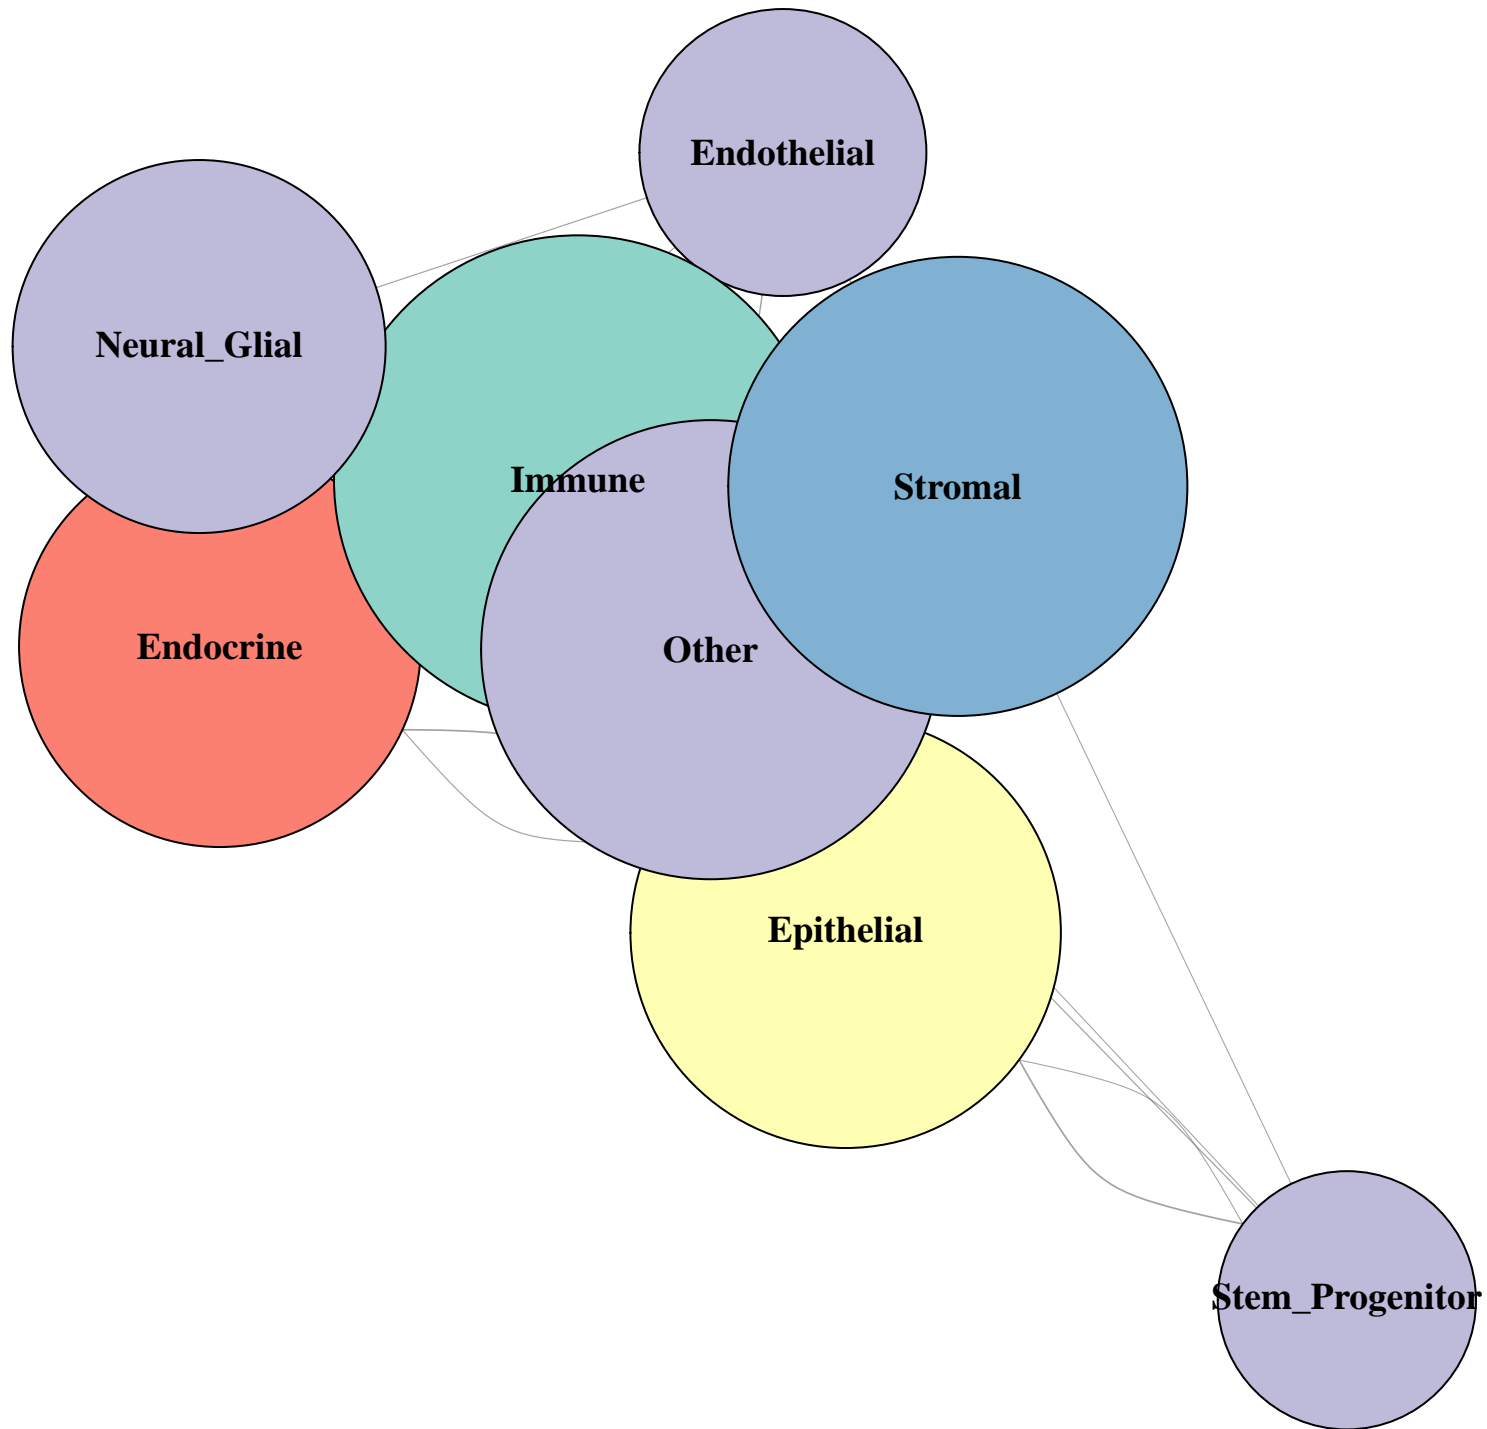

Supplement: supplementary_material [file network_global_simplified.pdf › covarnet/network_global_simplified.pdf]
