# Supplementary material
Source: ML conference proceedings conference paper supplement (https://openreview.net/forum?id=h40Nyr36om)

## Endocrine Enrichment by Cellular Module

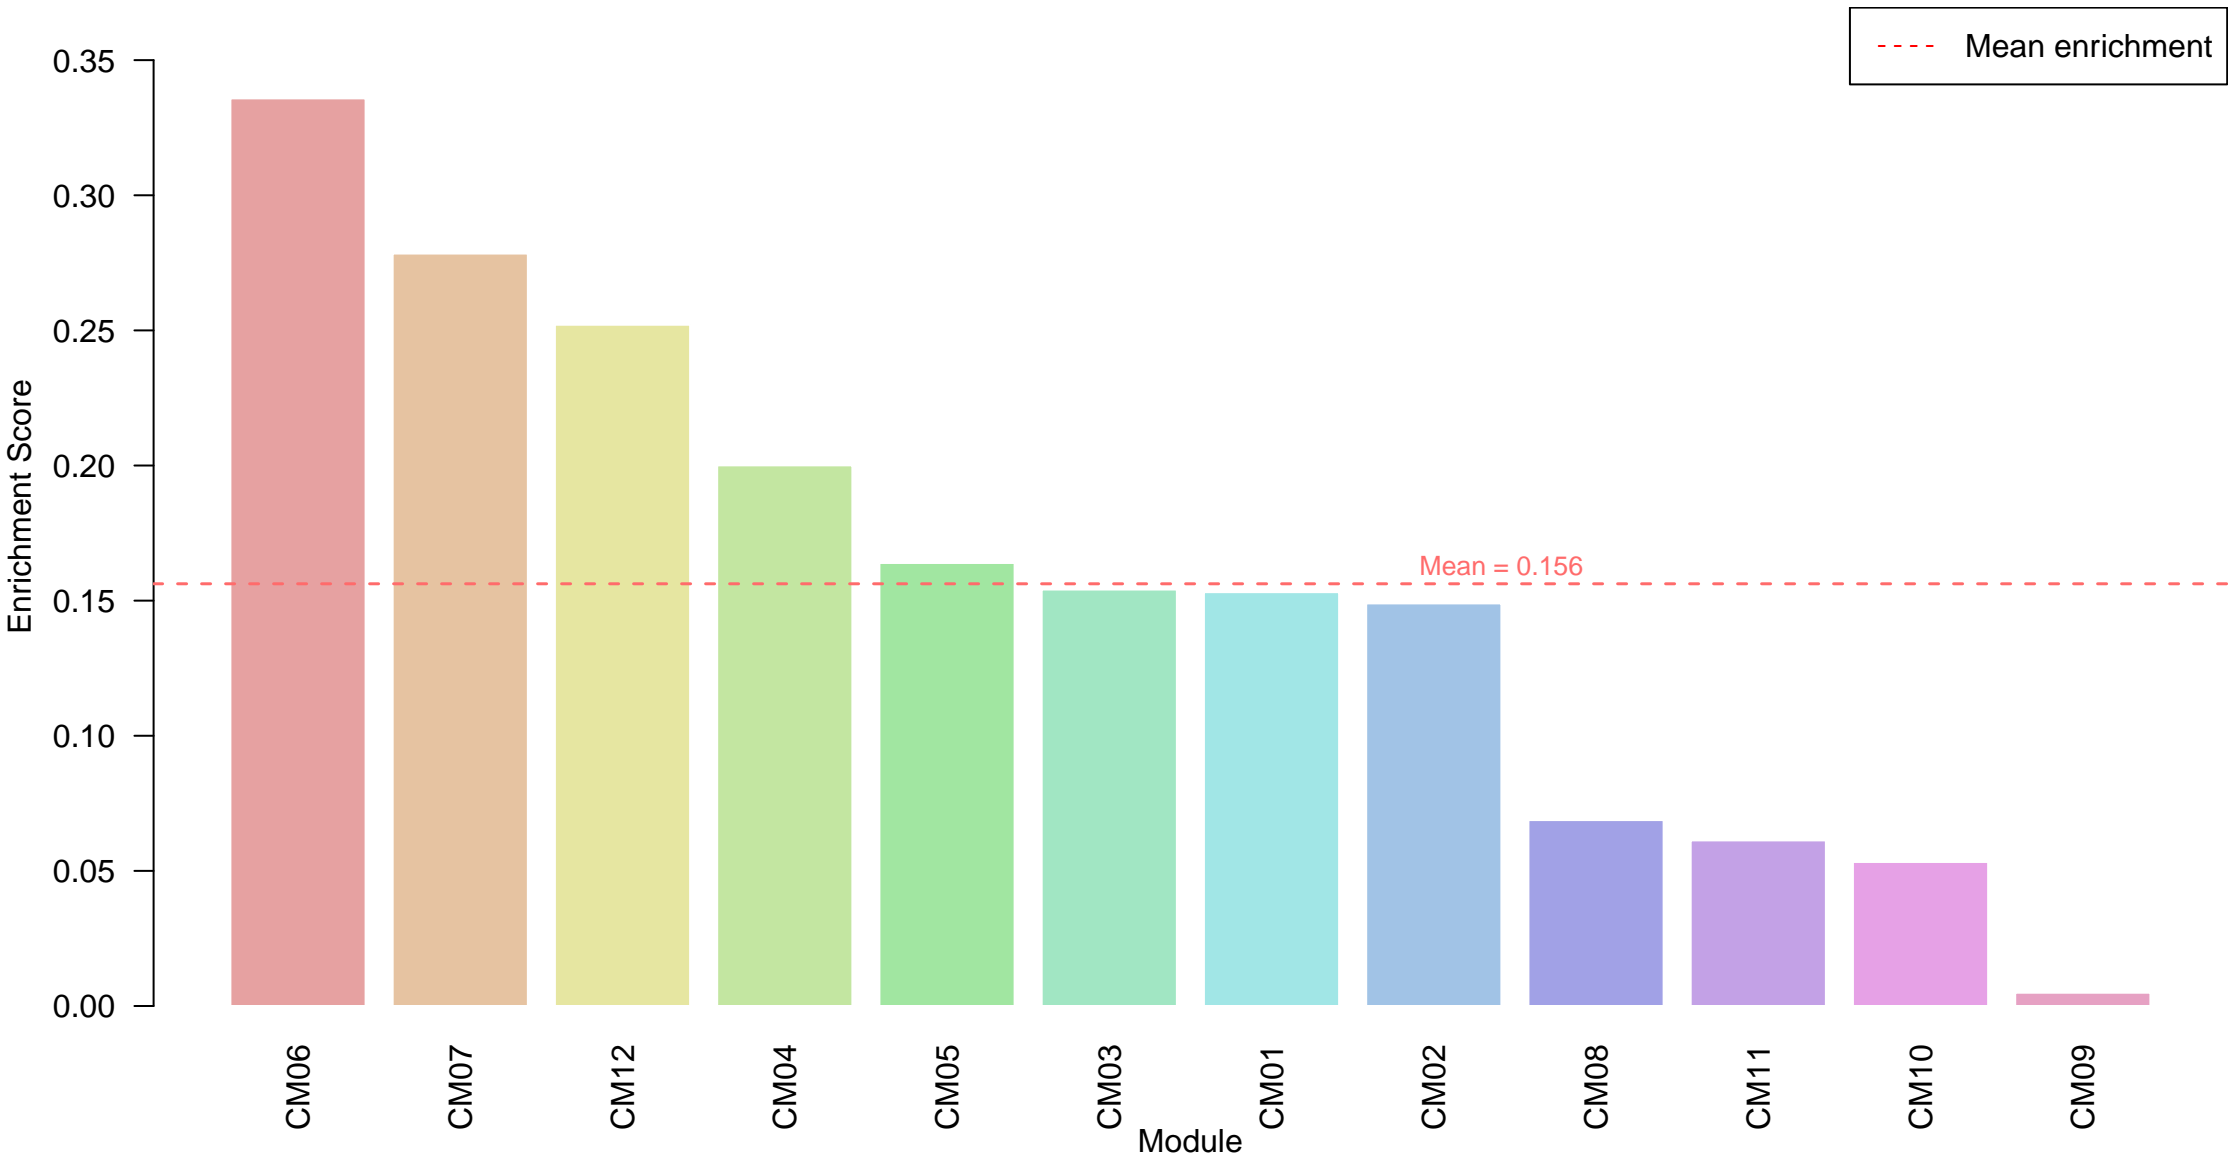

Supplement: supplementary_material [file endocrine_enrichment_barplot_K12.pdf › covarnet/endocrine_enrichment_barplot_K12.pdf]

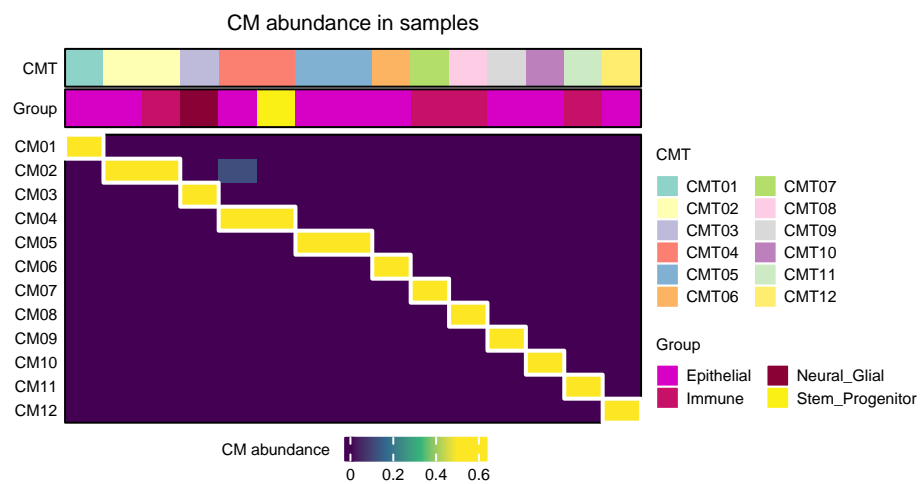

Supplement: supplementary_material [file module_distribution_majorCluster_K12.pdf › covarnet/module_distribution_majorCluster_K12.pdf]

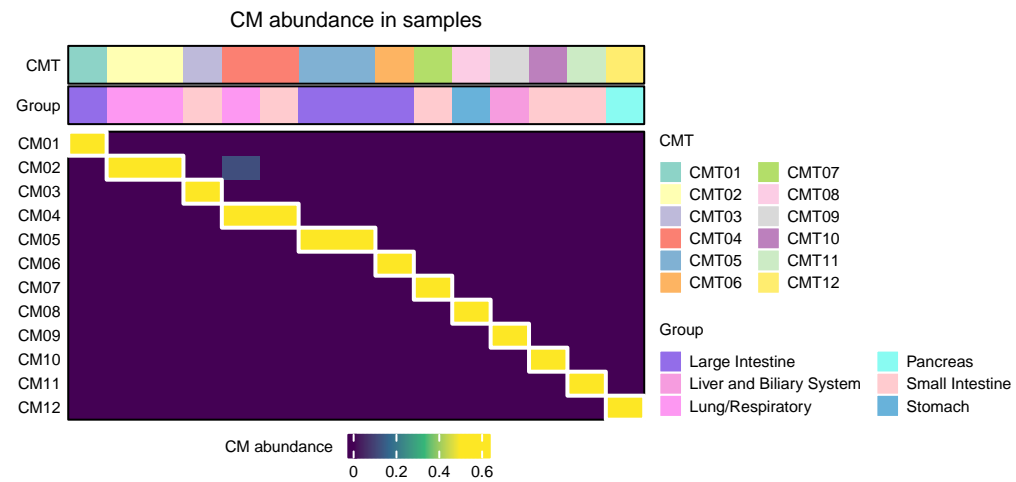

Supplement: supplementary_material [file module_distribution_tissue_category_K12.pdf › covarnet/module_distribution_tissue_category_K12.pdf]

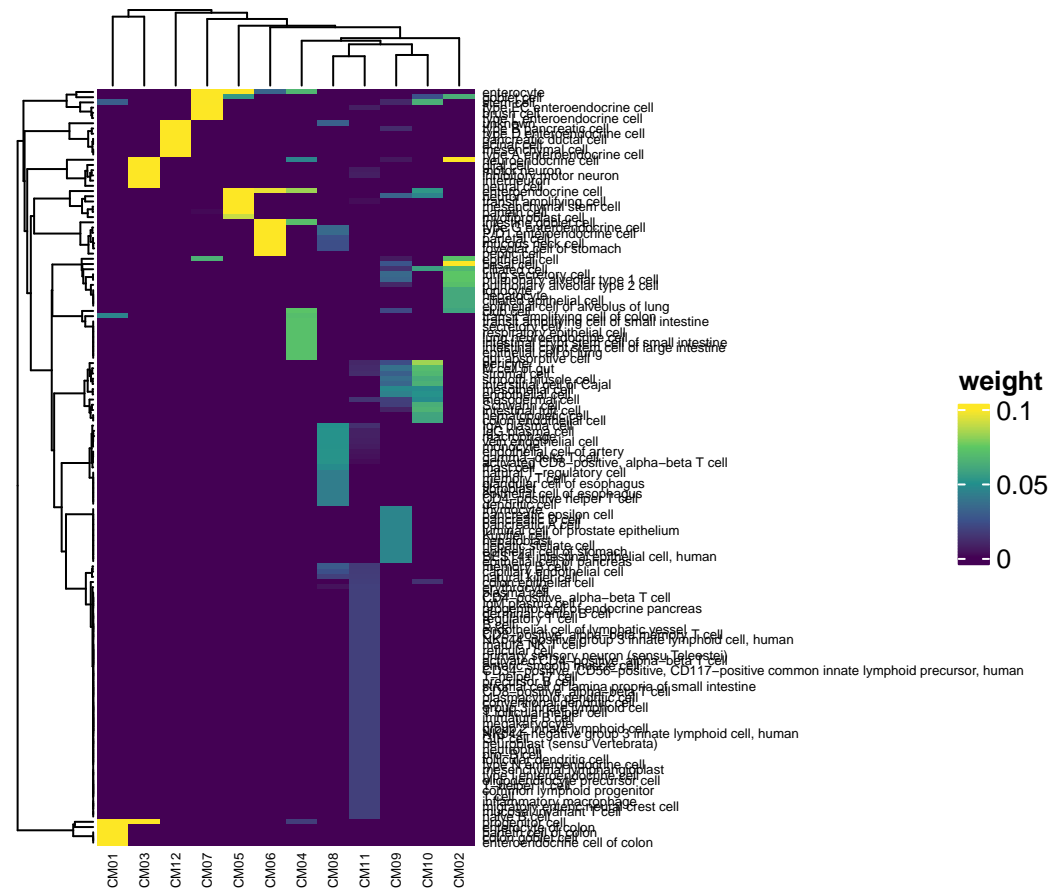

Supplement: supplementary_material [file module_weights_all_K12.pdf › covarnet/module_weights_all_K12.pdf]

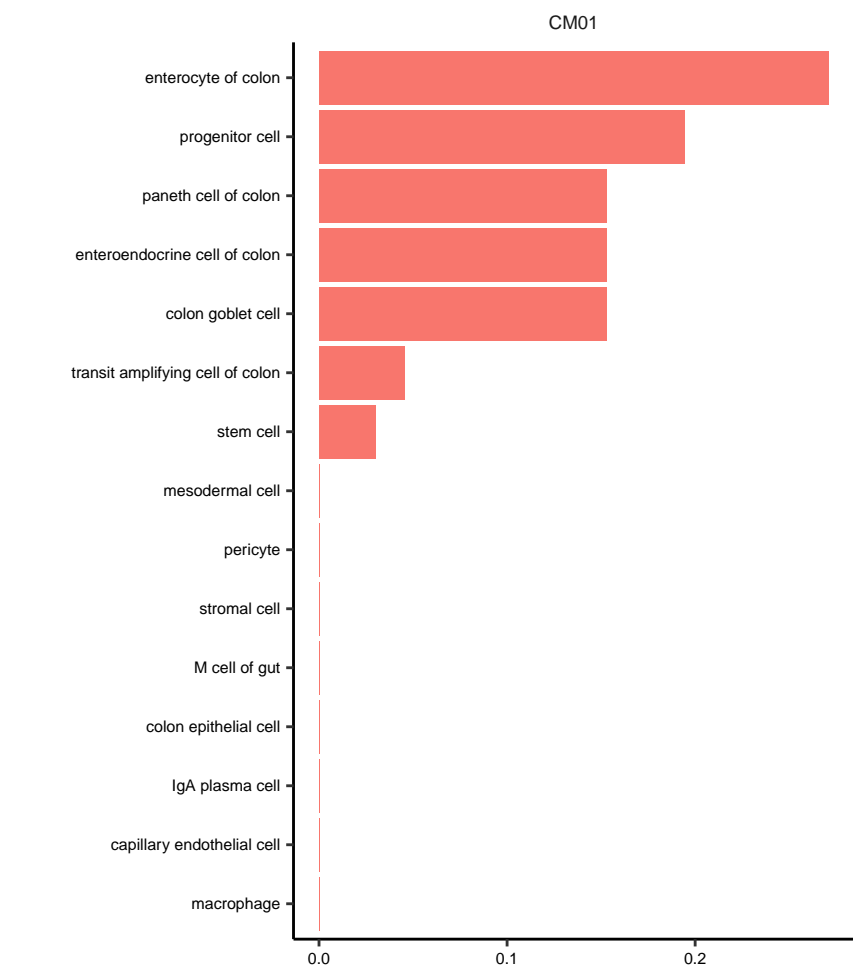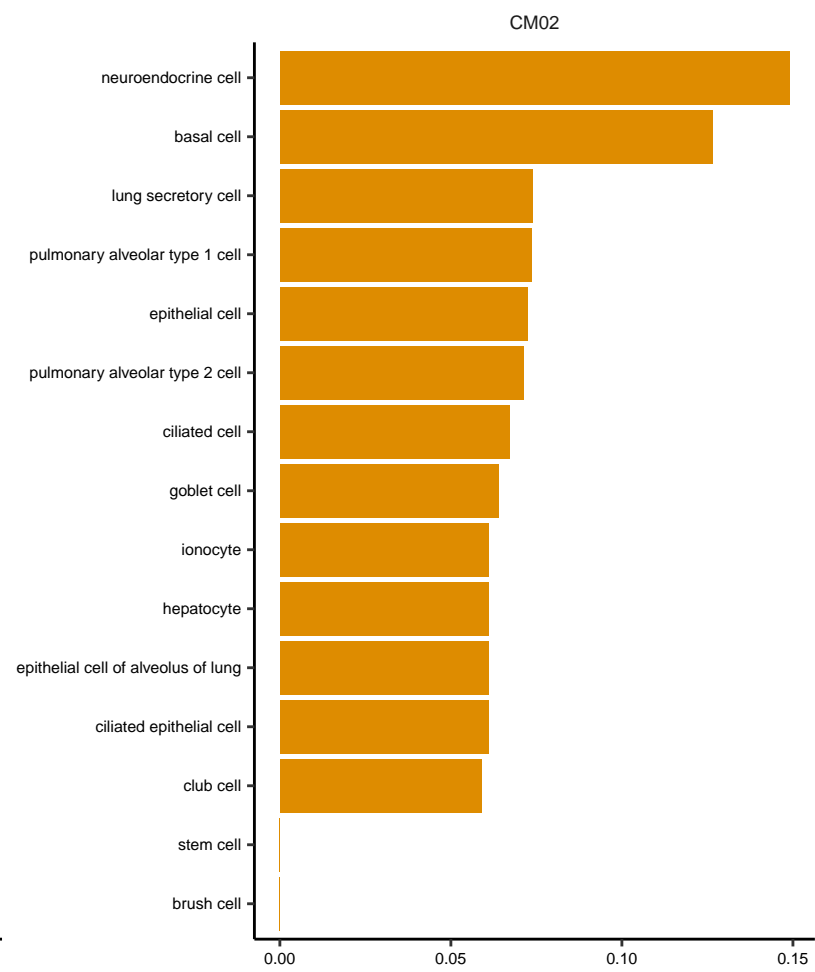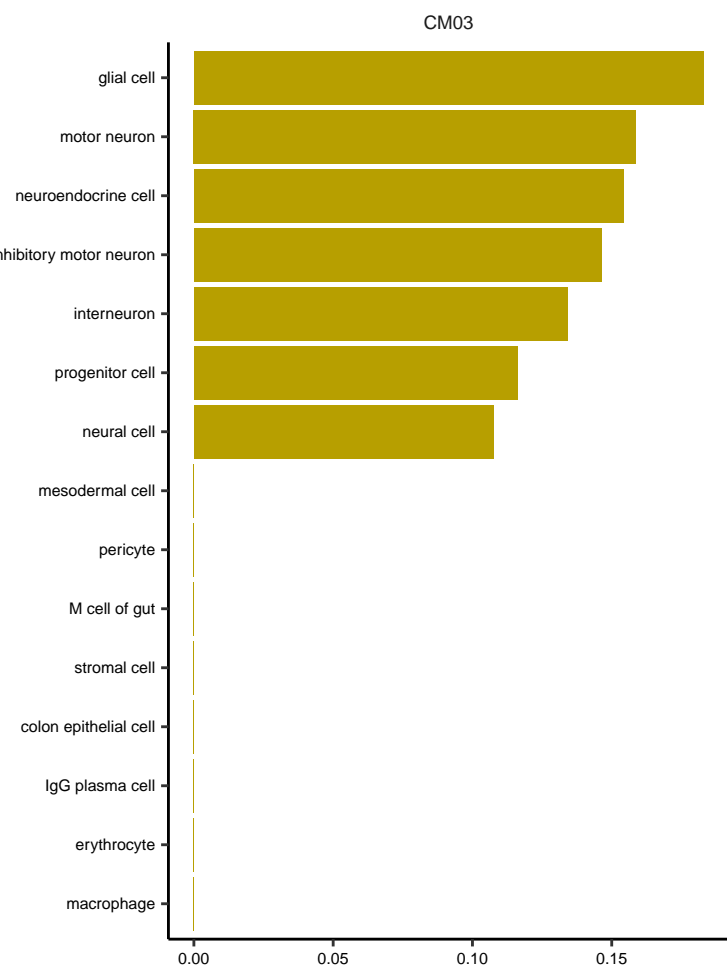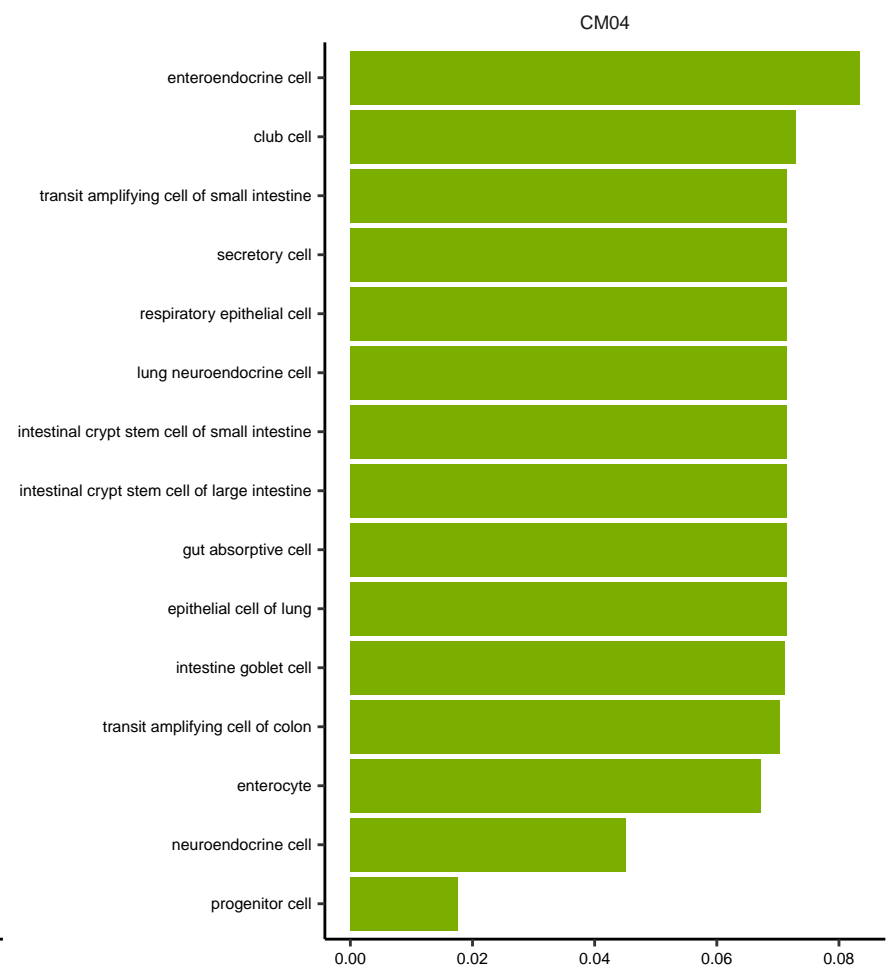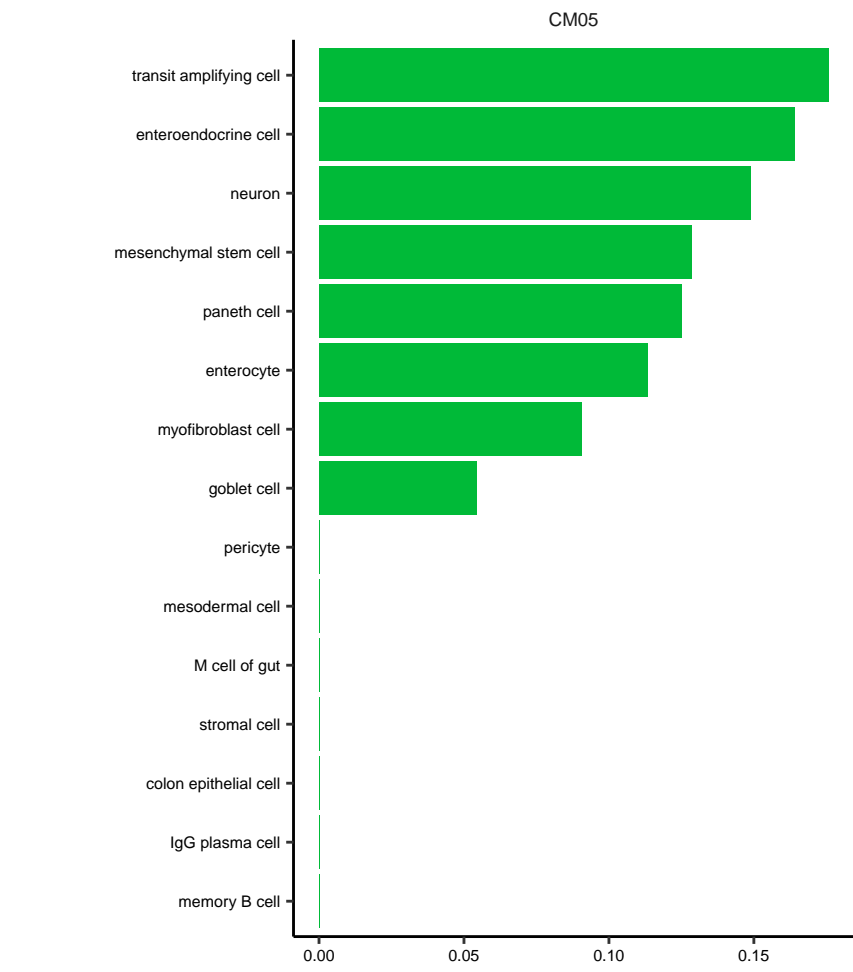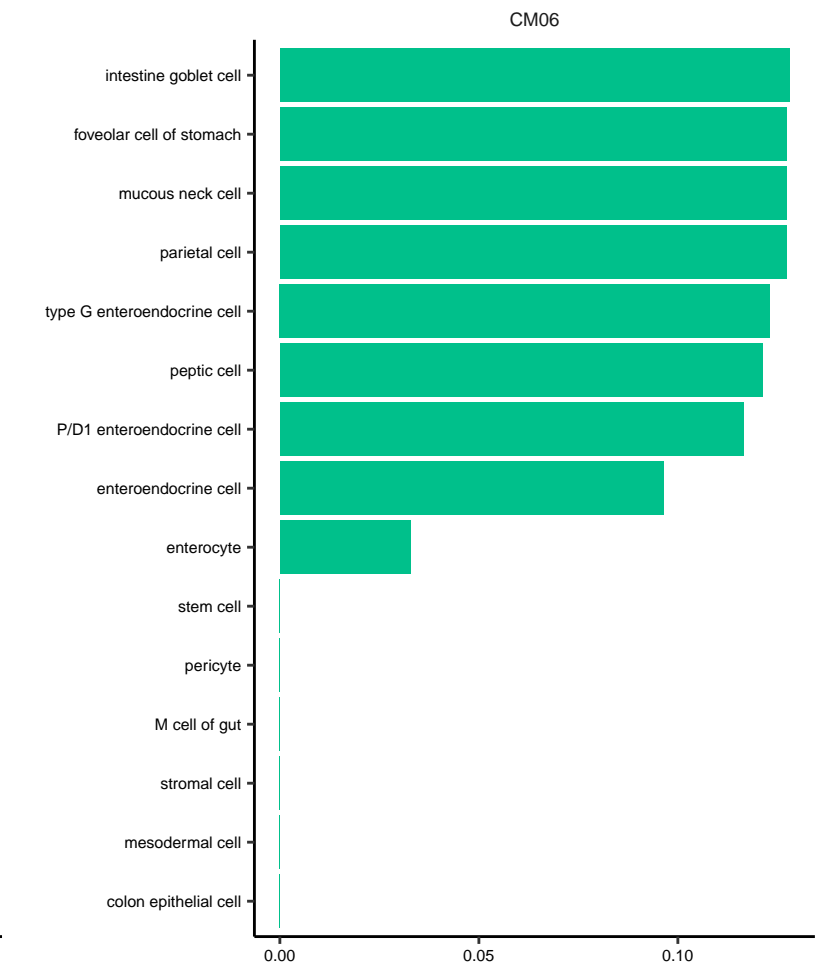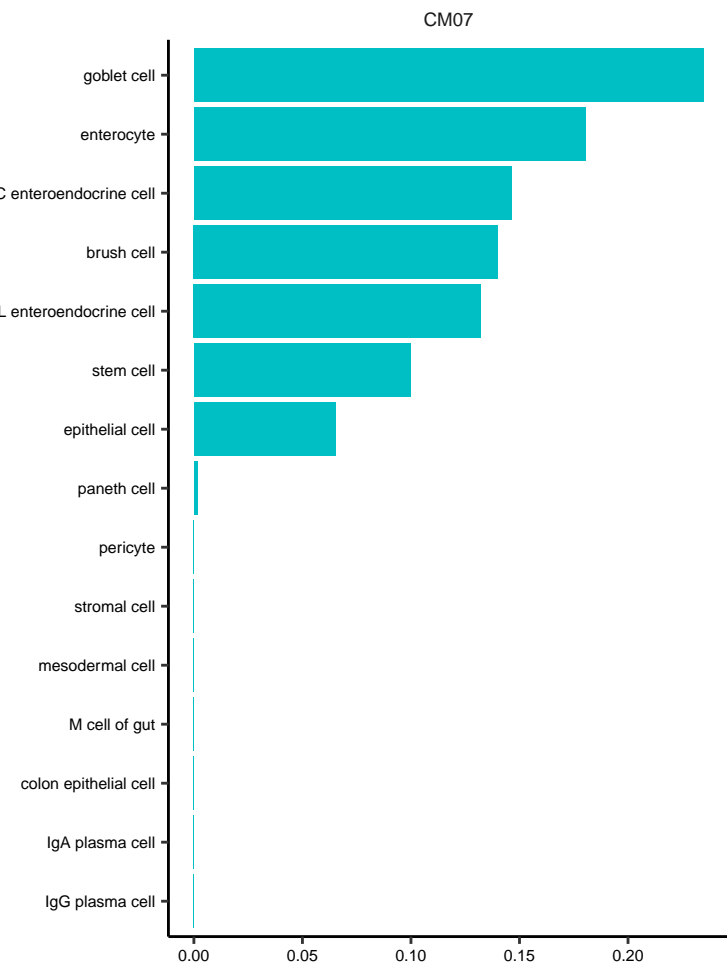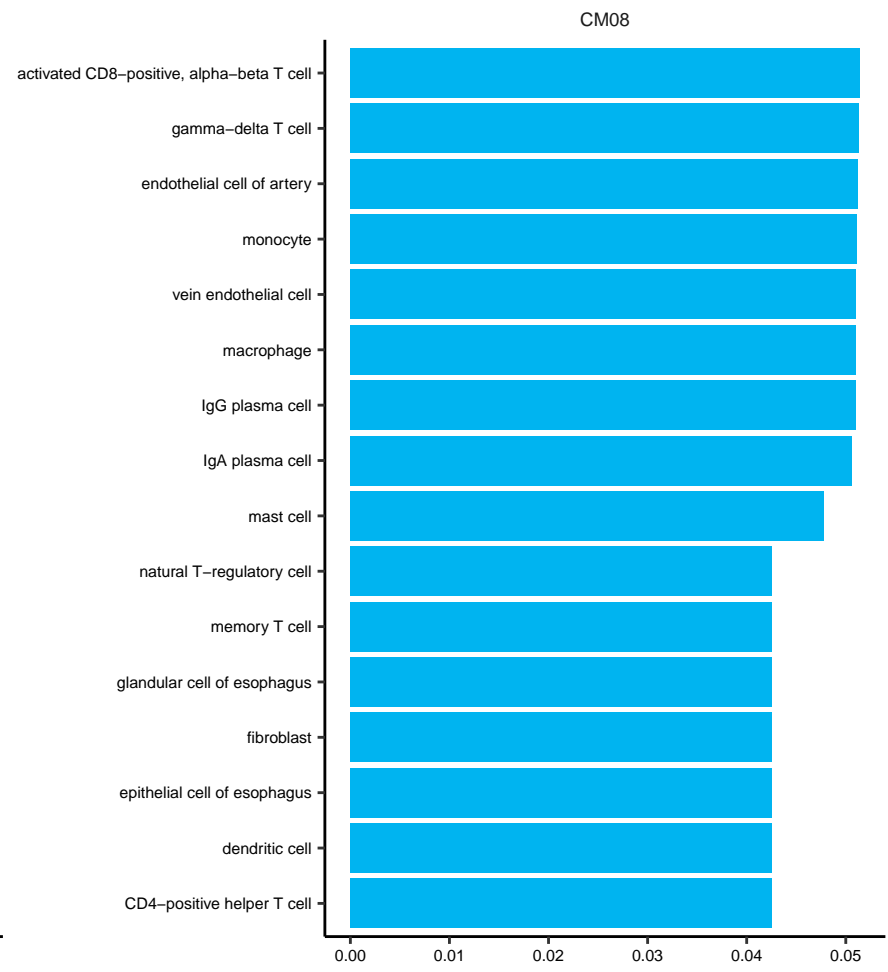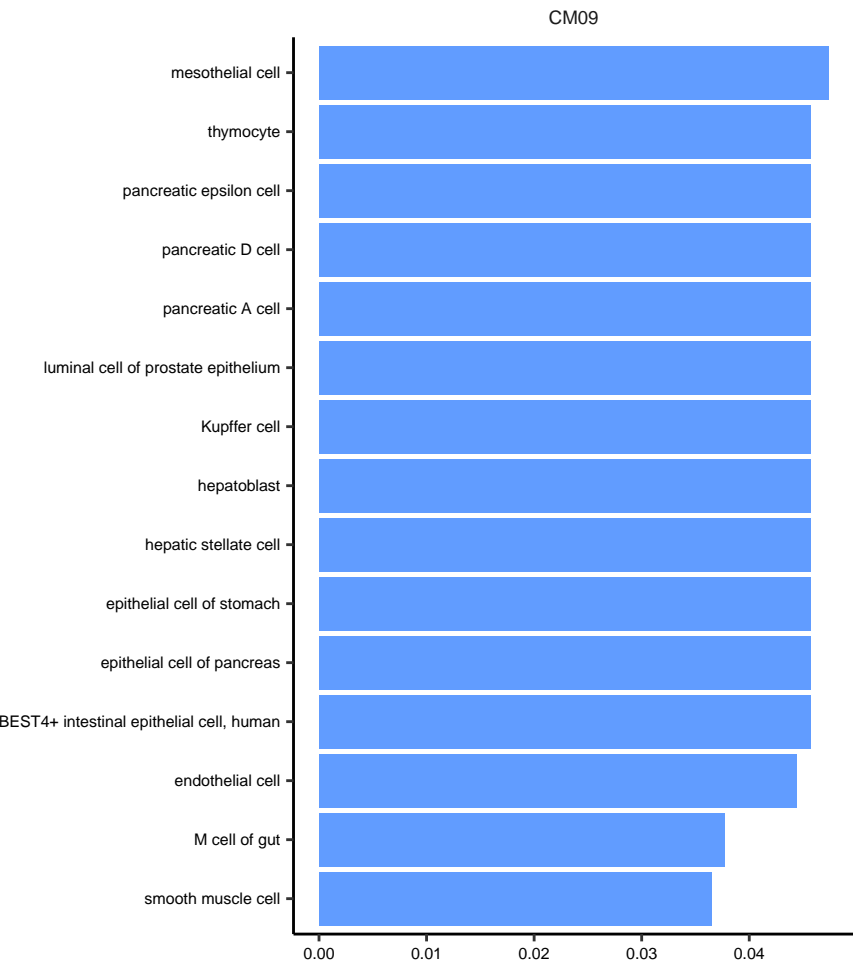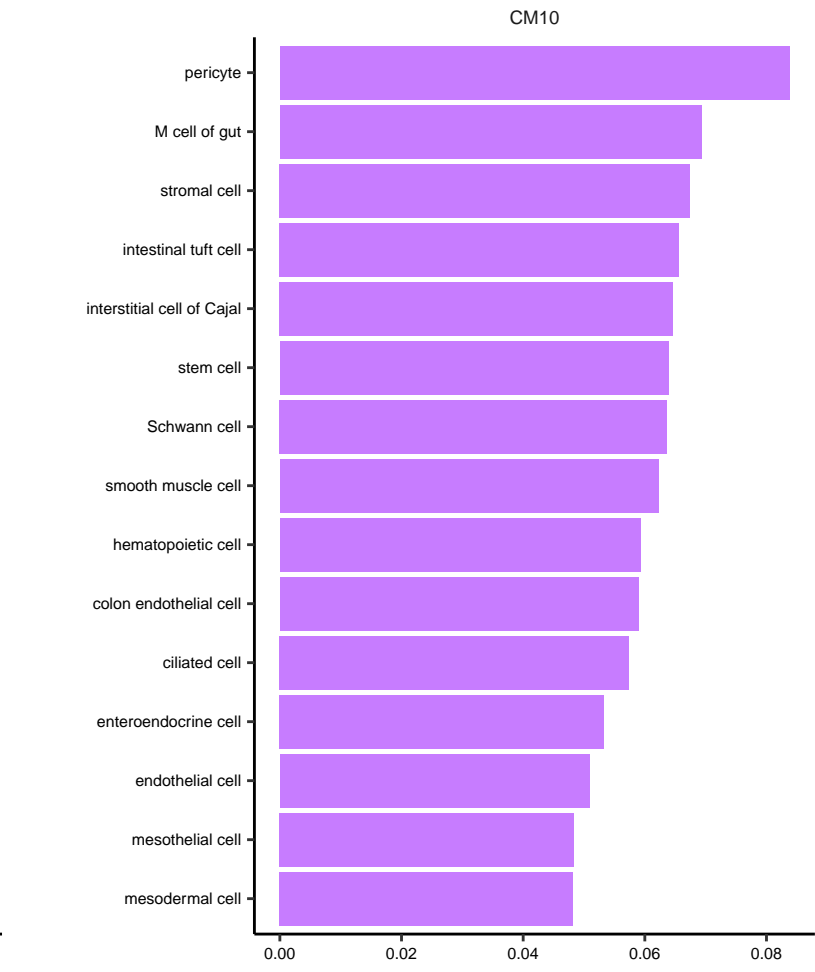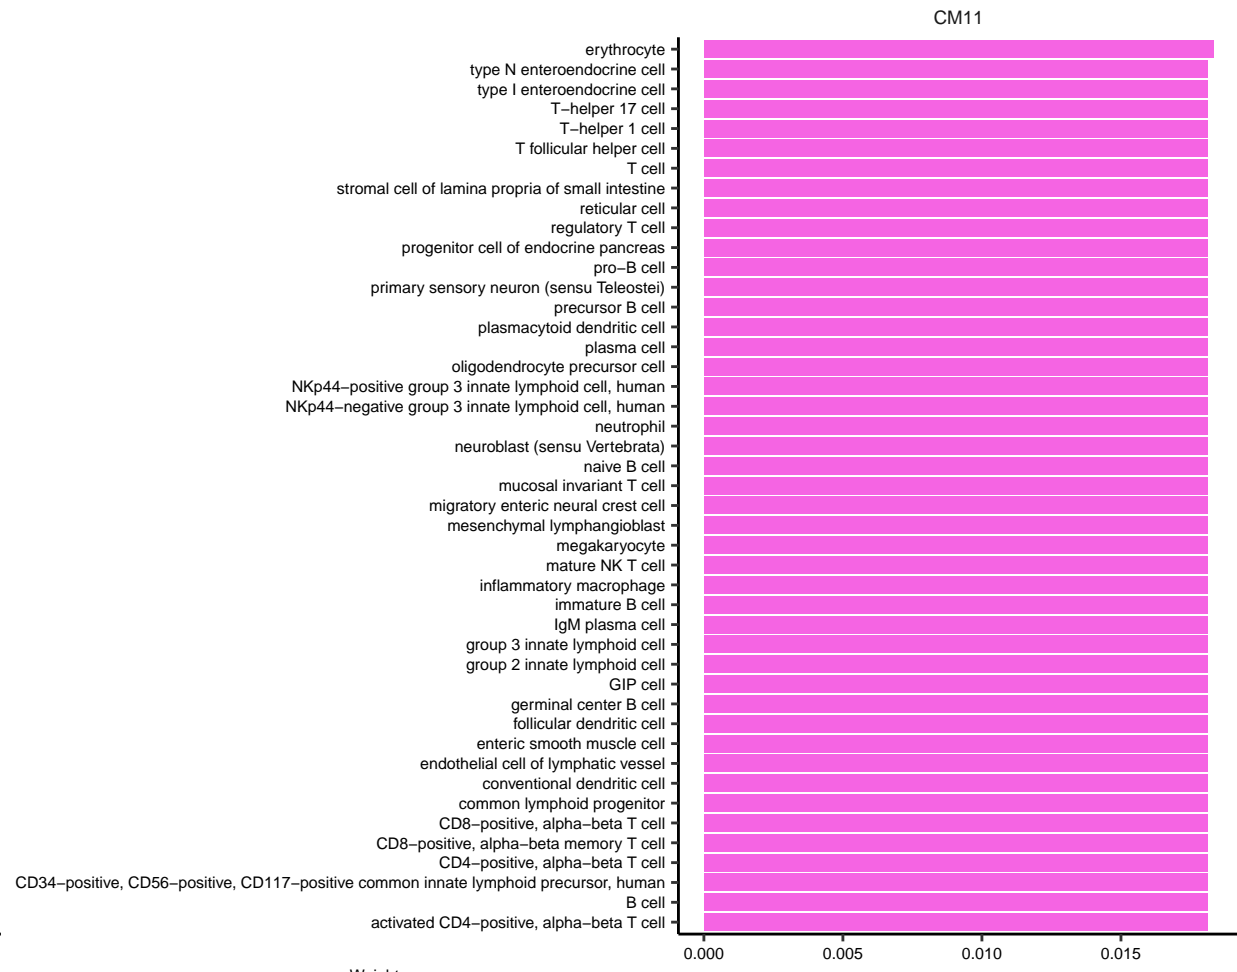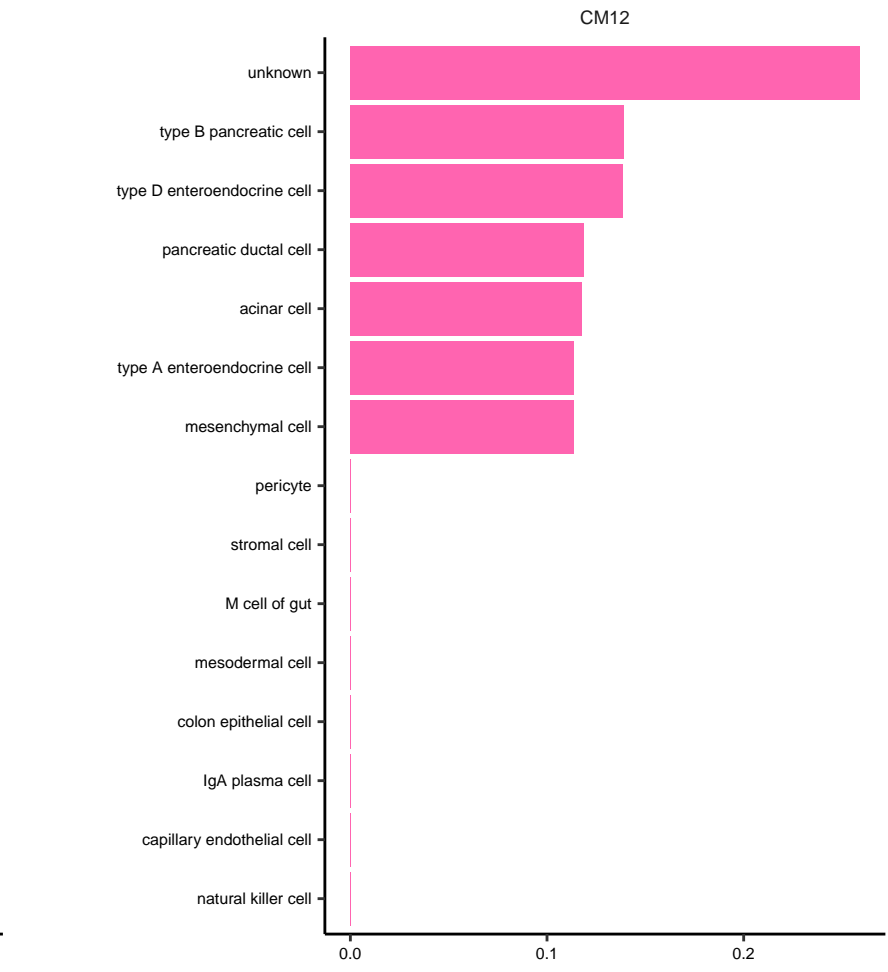

Supplement: supplementary_material [file module_weights_top15_enhanced_K12.pdf › covarnet/module_weights_top15_enhanced_K12.pdf]

### Endocrine Cell Subnetwork with Tissue Annotations (Pastel Palette)

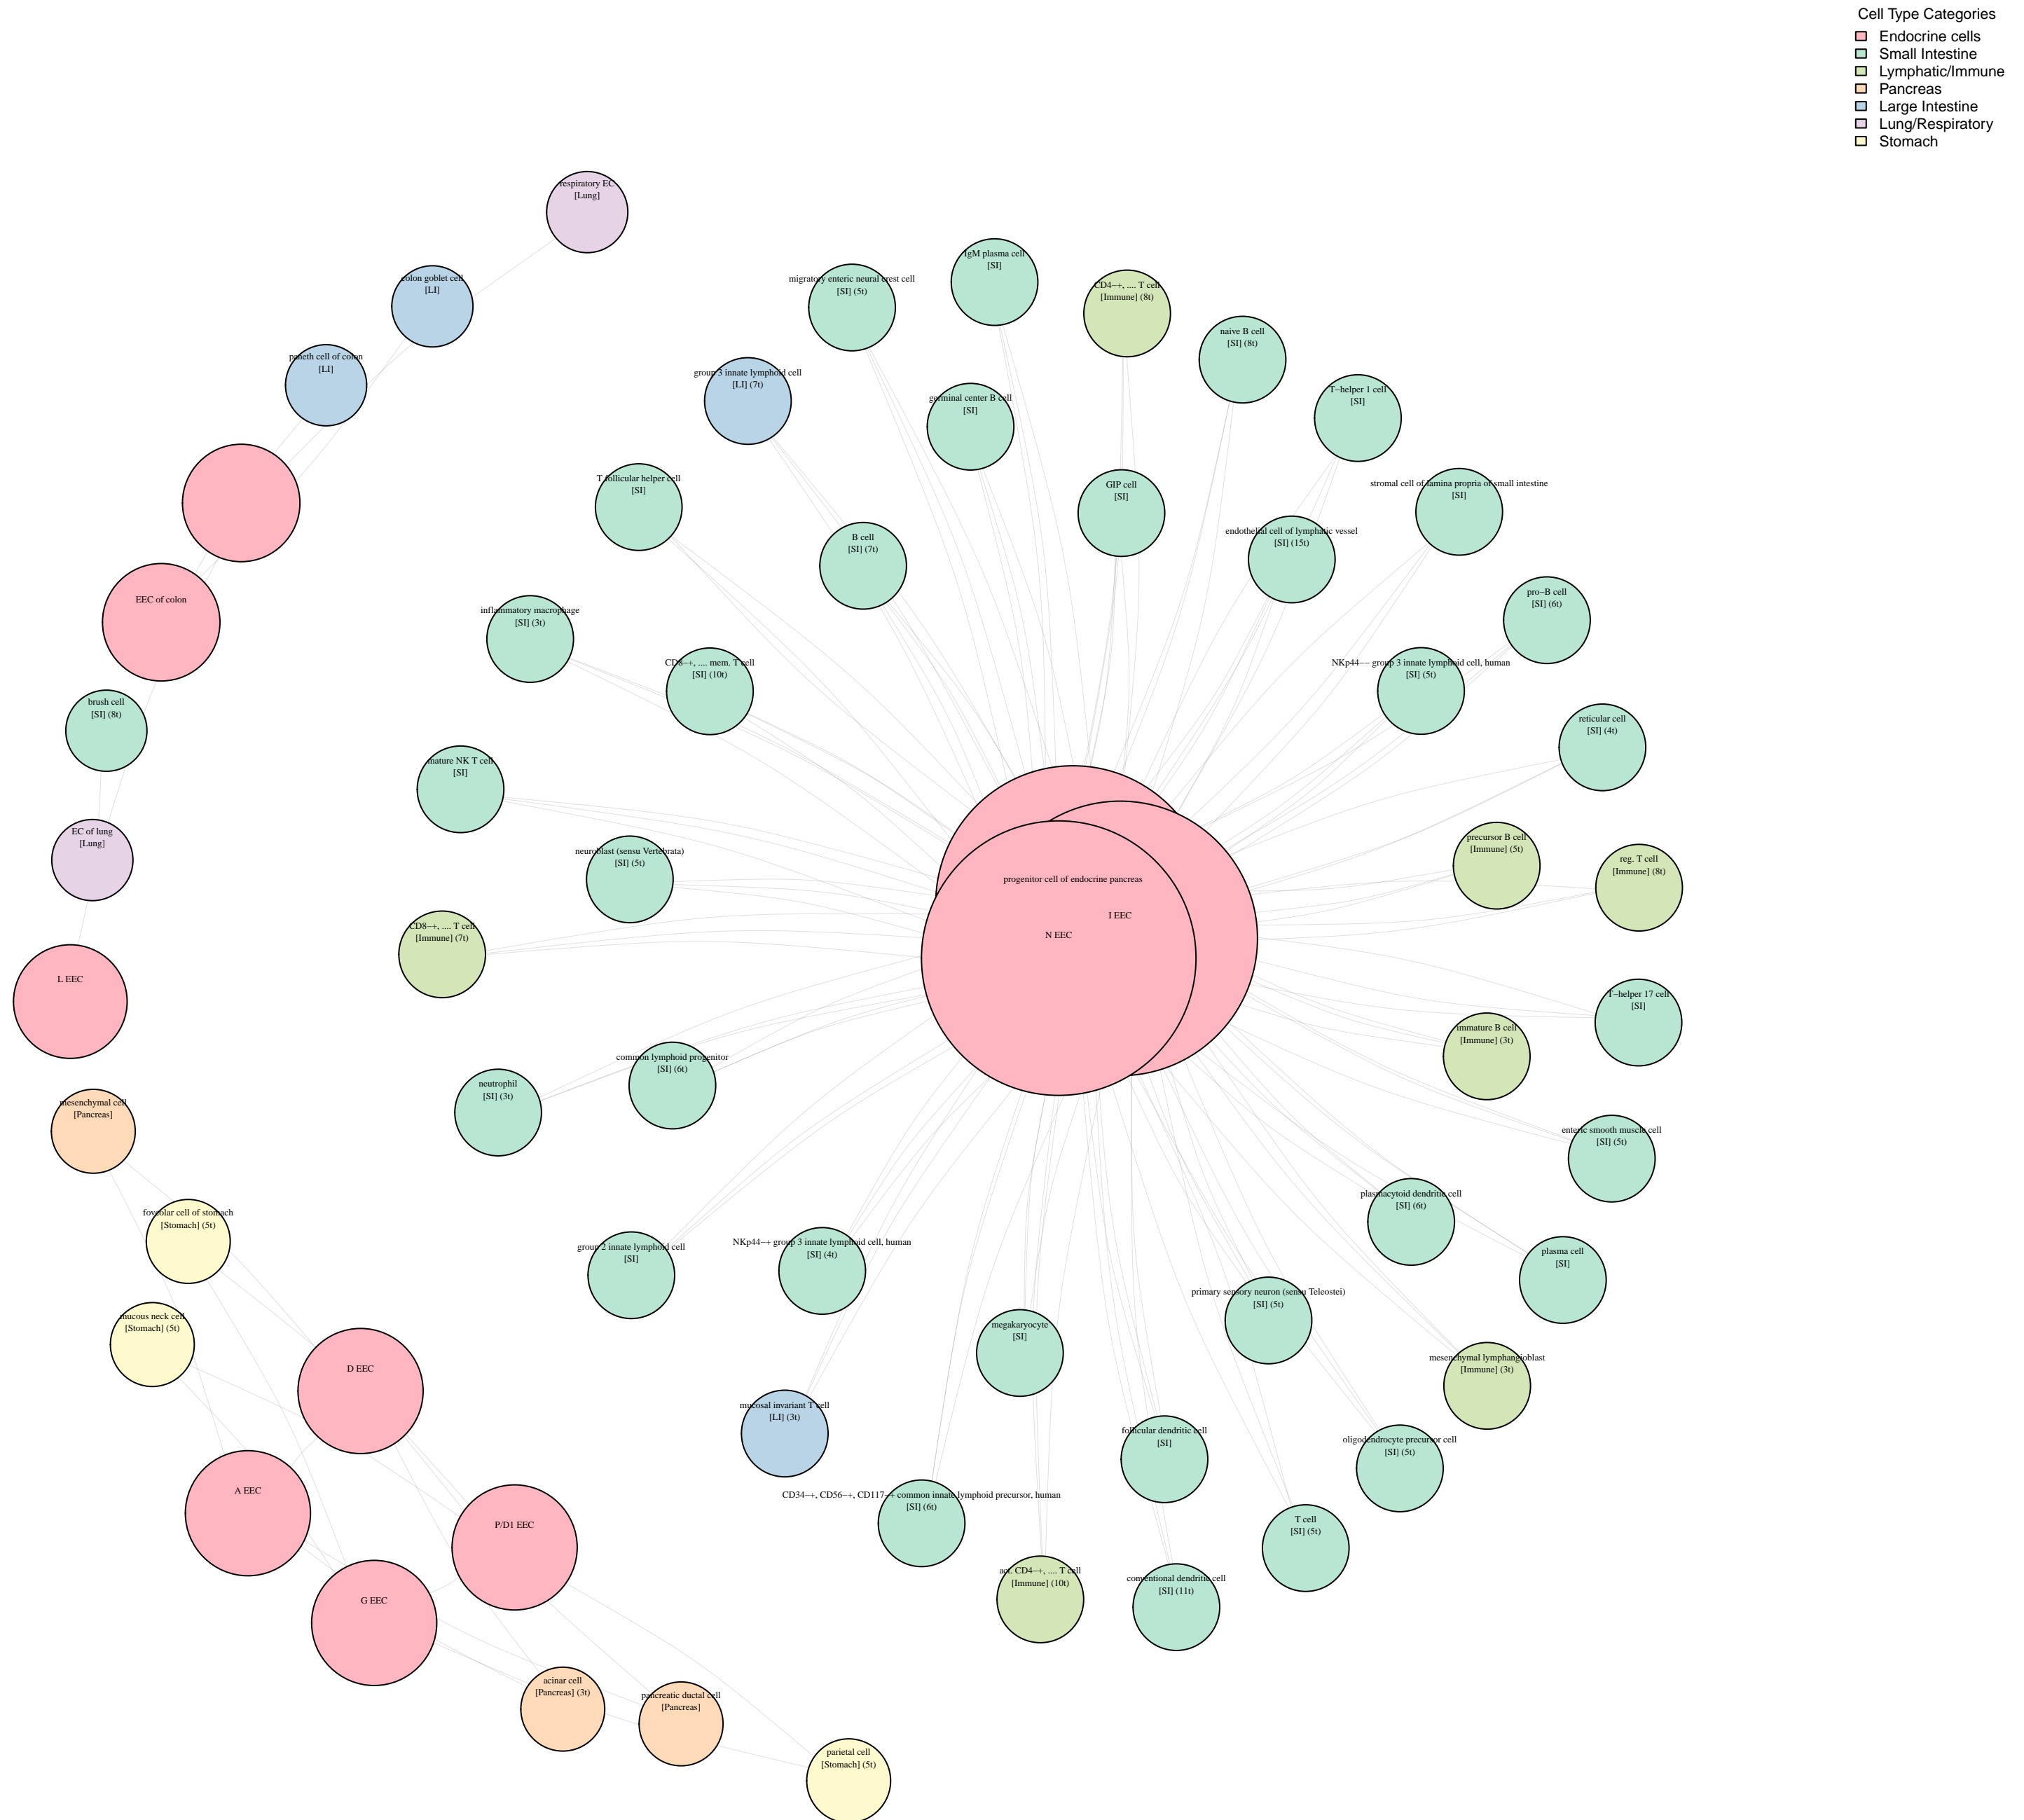

Supplement: supplementary_material [file network_endocrine_tissue_pastel.pdf › covarnet/network_endocrine_tissue_pastel.pdf]

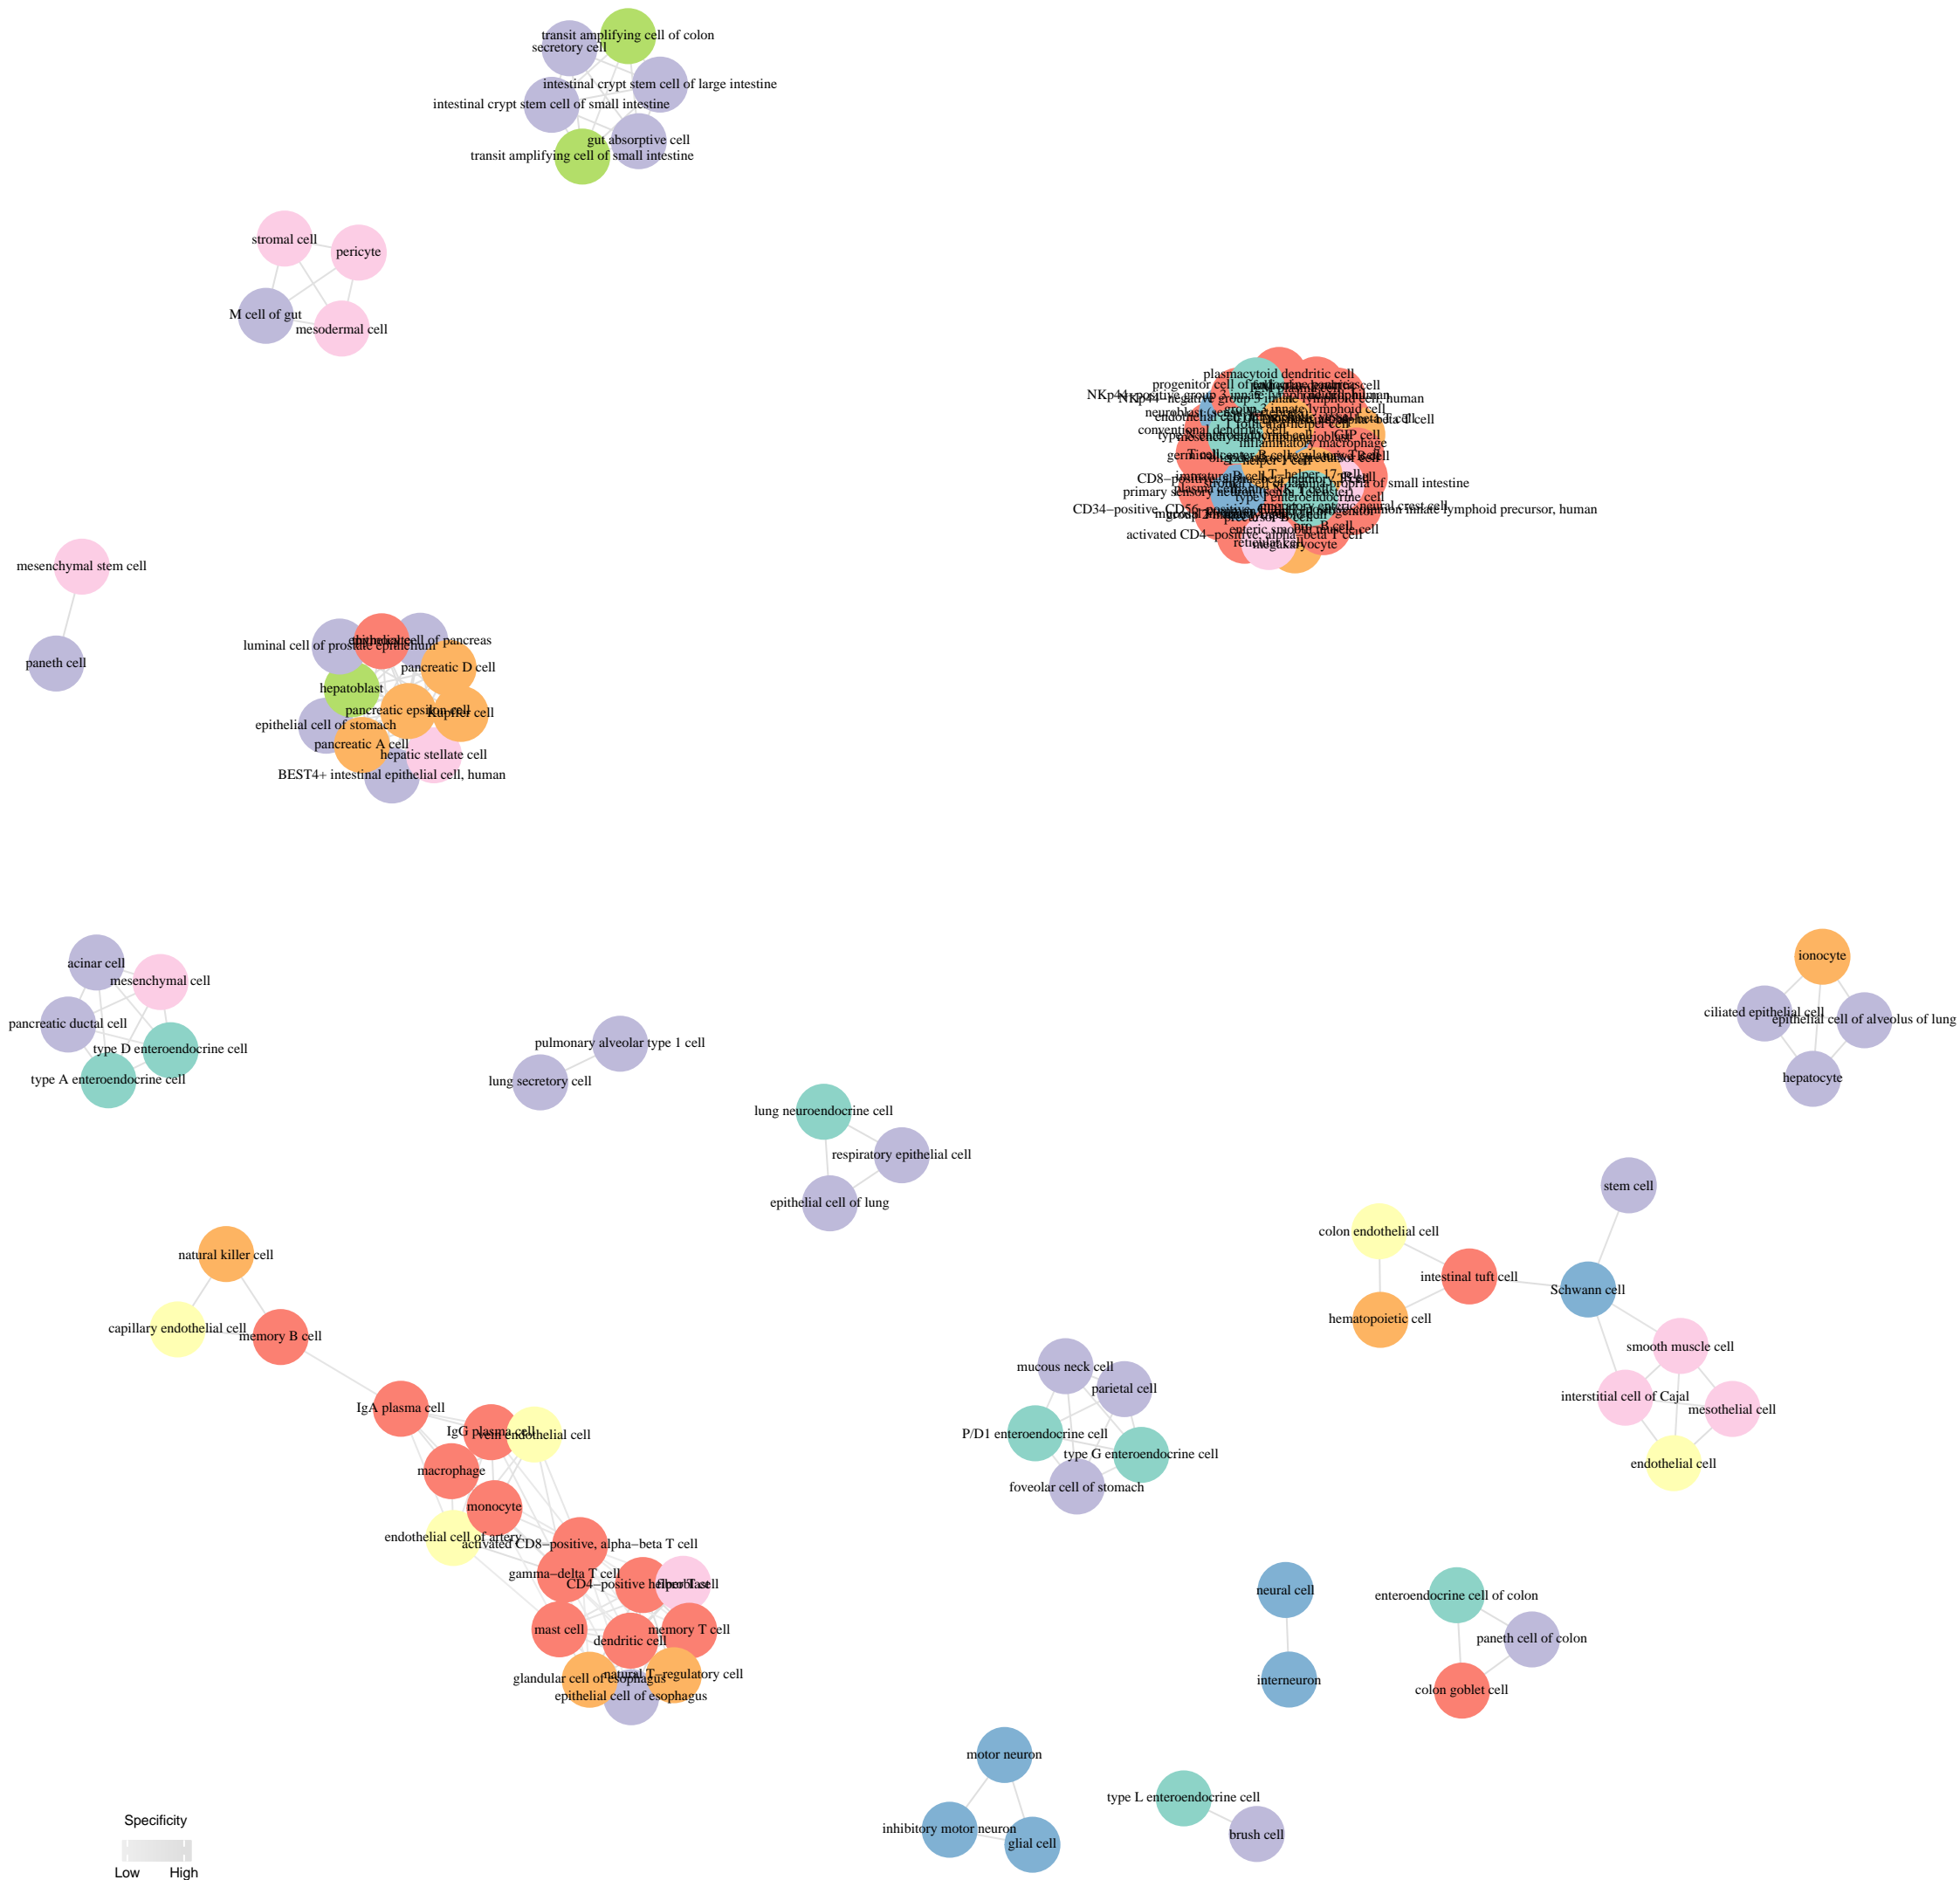

Supplement: supplementary_material [file network_global_enhanced_v1.pdf › covarnet/network_global_enhanced_v1.pdf]

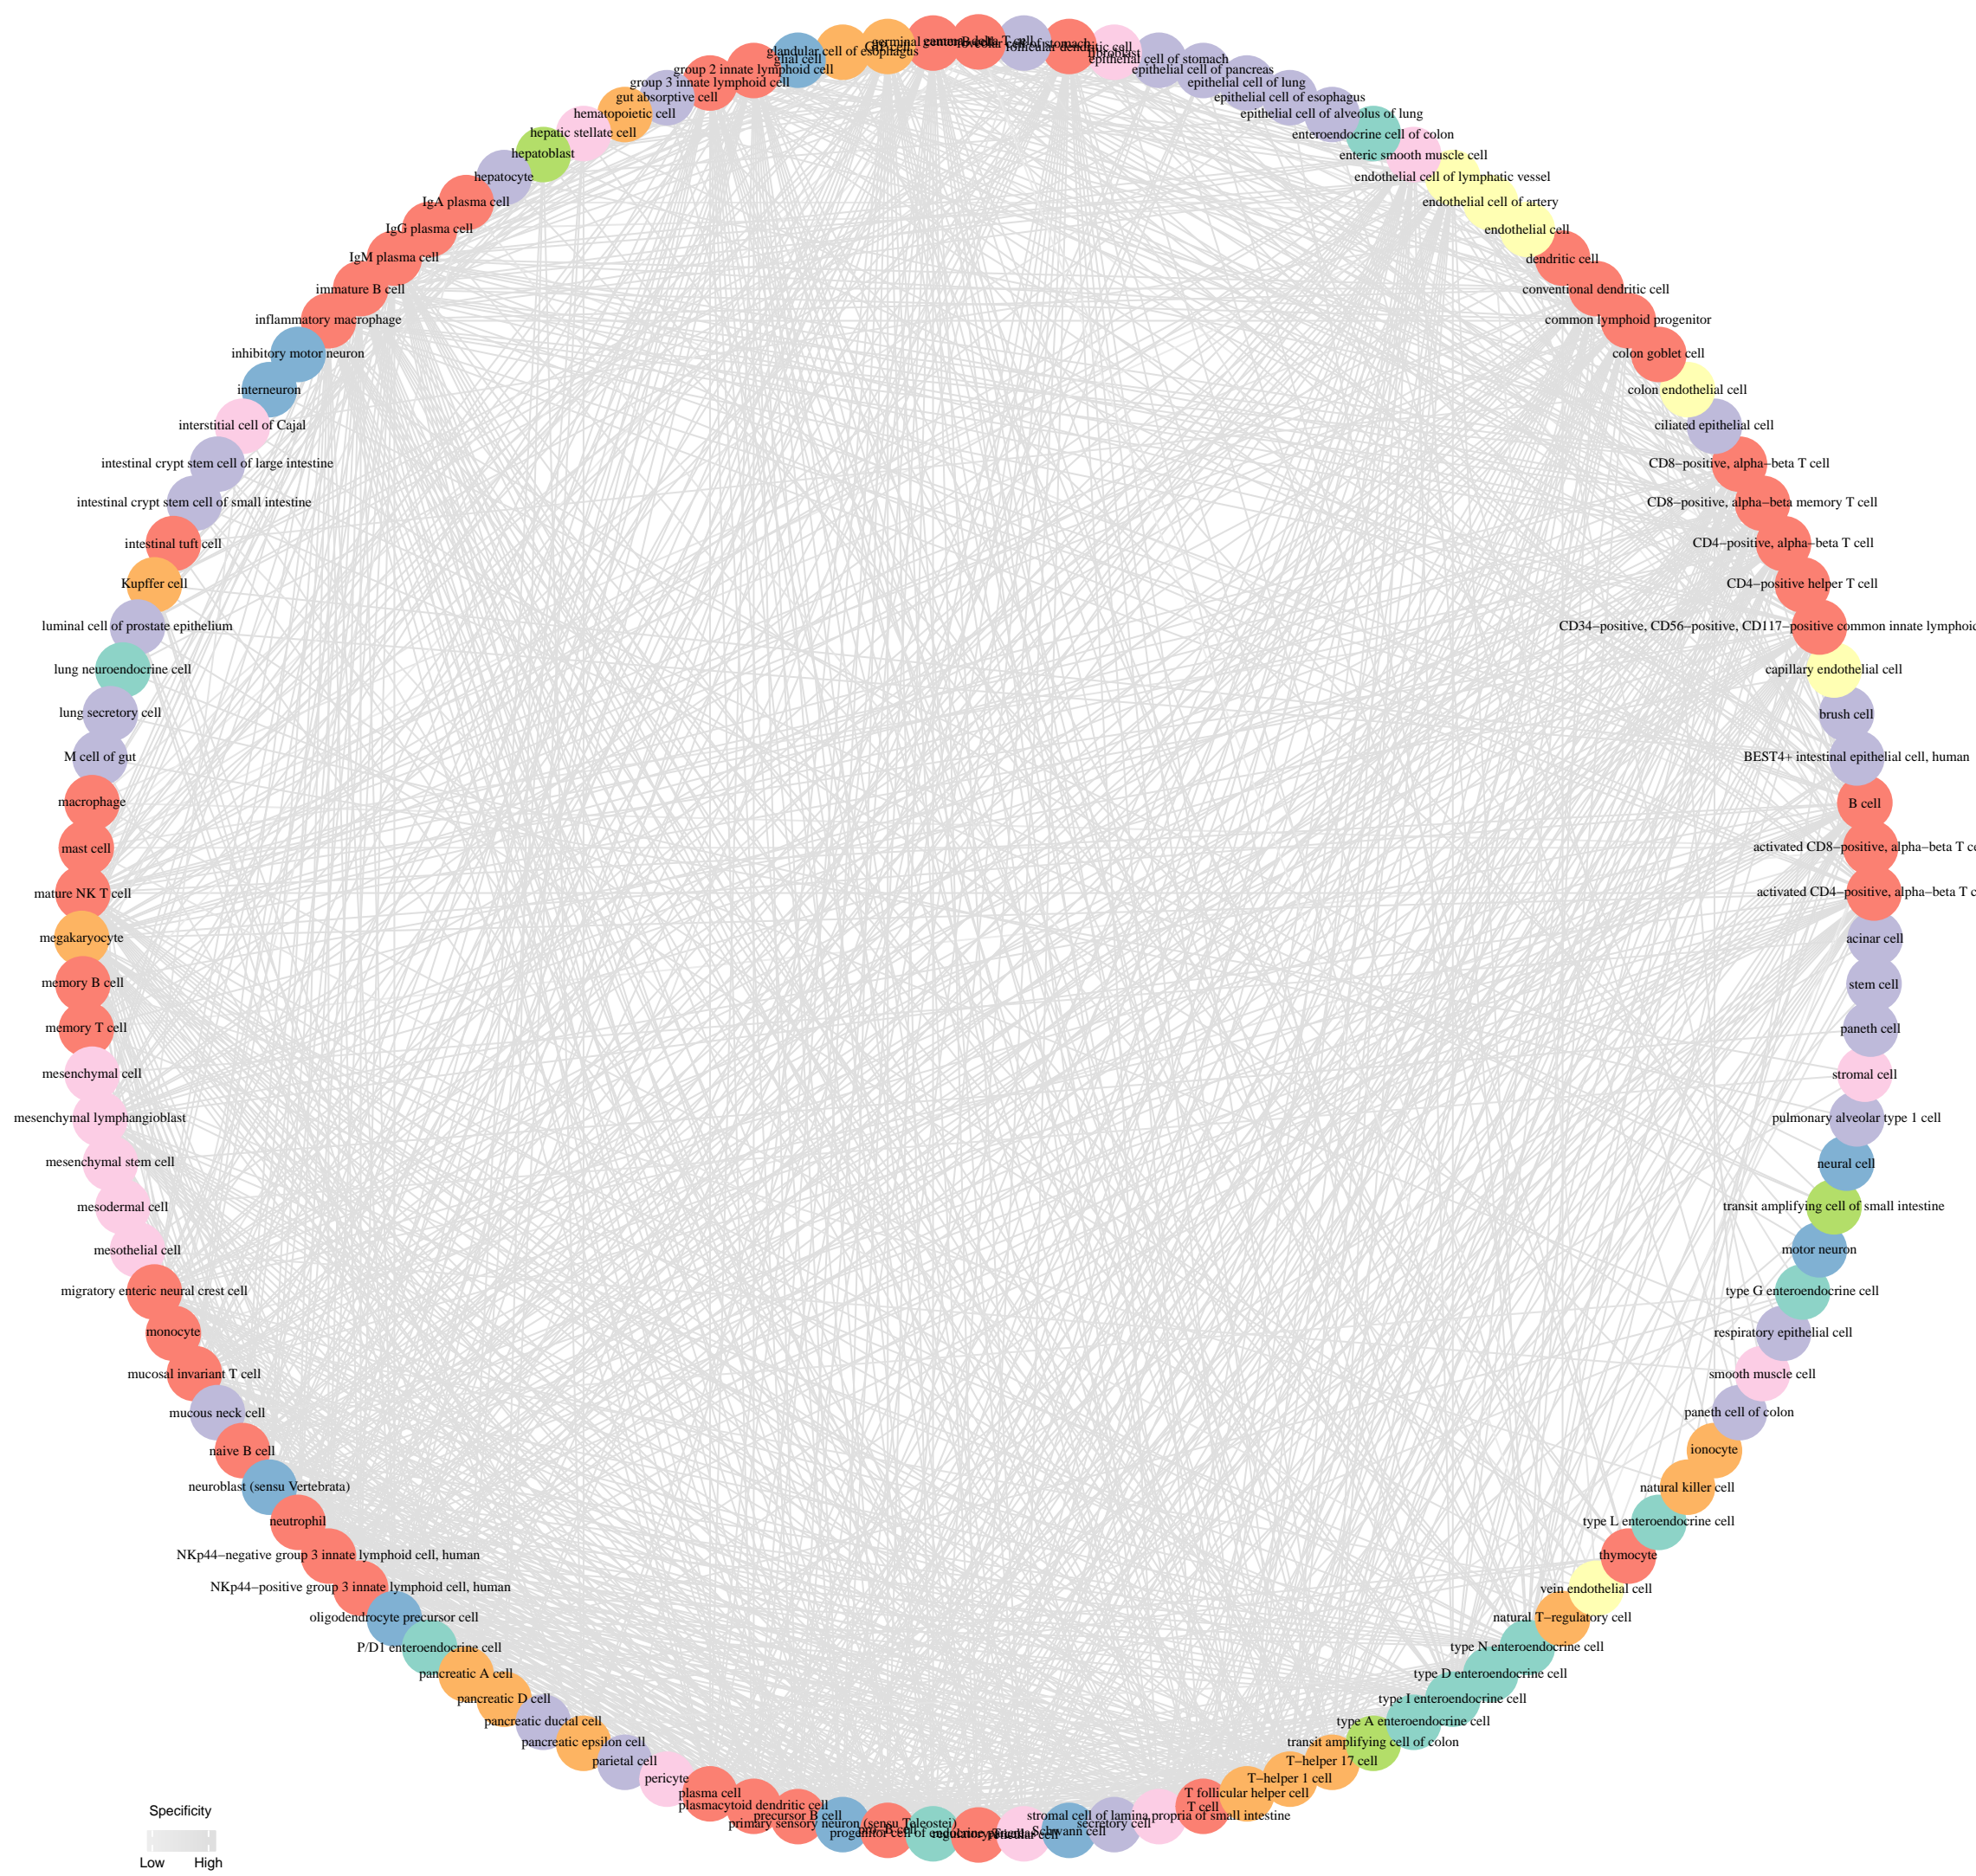

Supplement: supplementary_material [file network_global_enhanced_v2.pdf › covarnet/network_global_enhanced_v2.pdf]

CM01

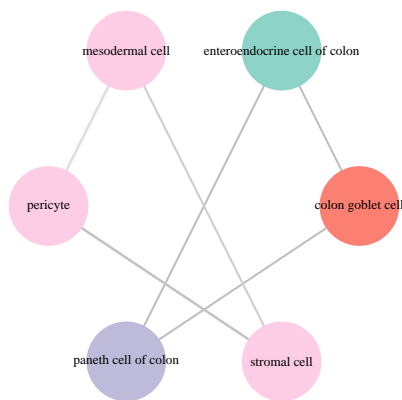

CM02

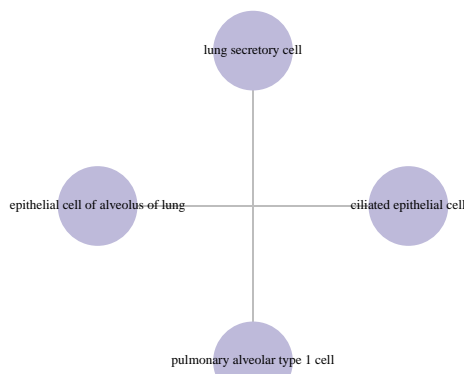

CM03

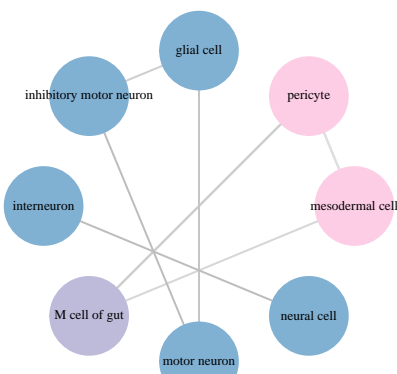

CM04

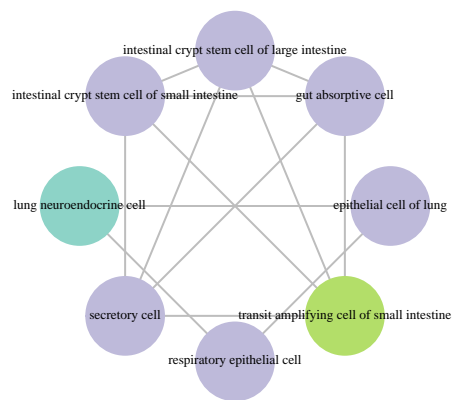

CM05

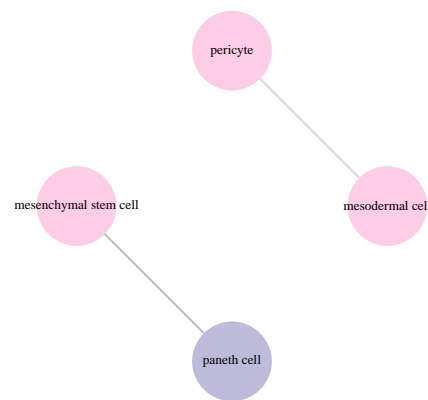

CM06

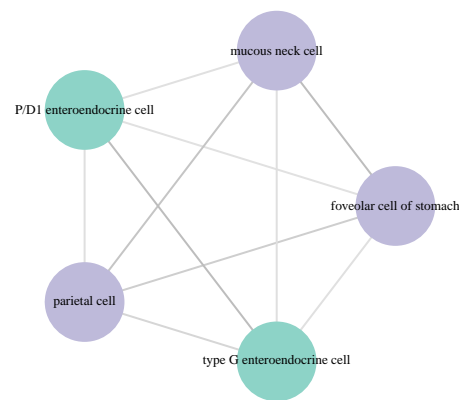

CM07

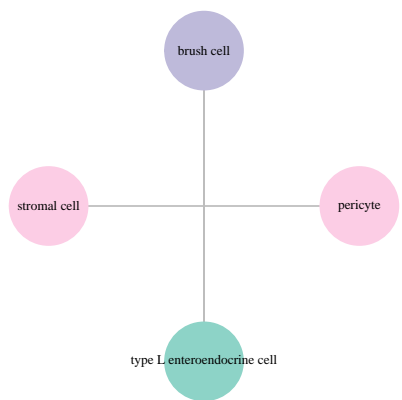

CM08

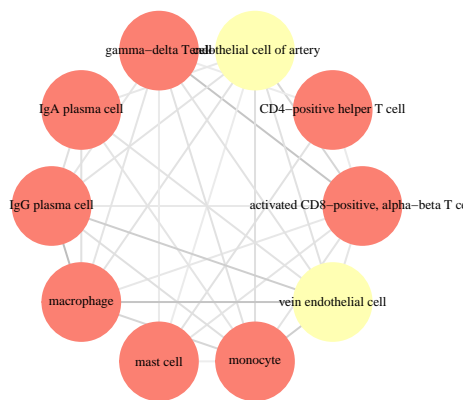

CM09

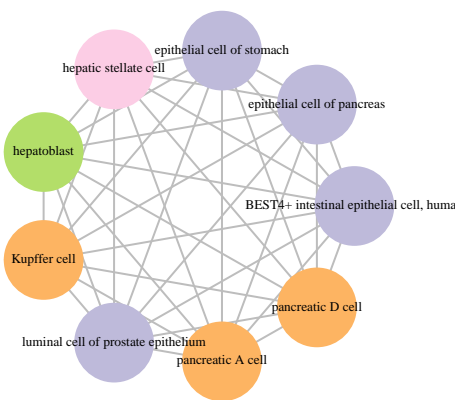

CM10

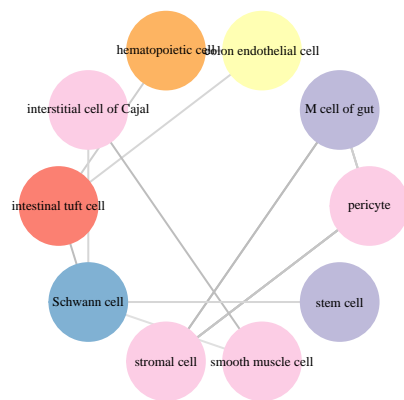

CM11

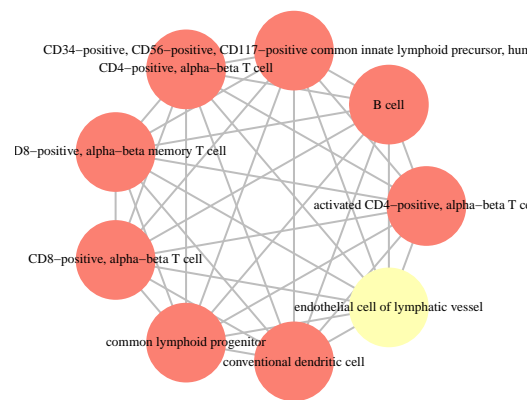

CM12

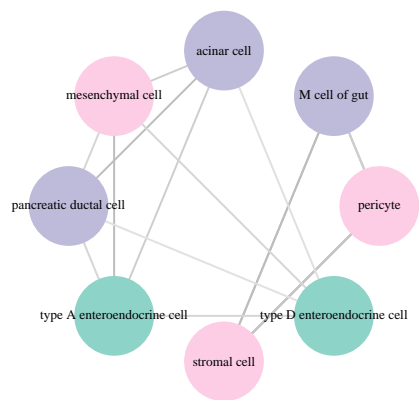

Supplement: supplementary_material [file network_individual_modules_K12.pdf › covarnet/network_individual_modules_K12.pdf]

## Top 30 Most Connected Cell Types

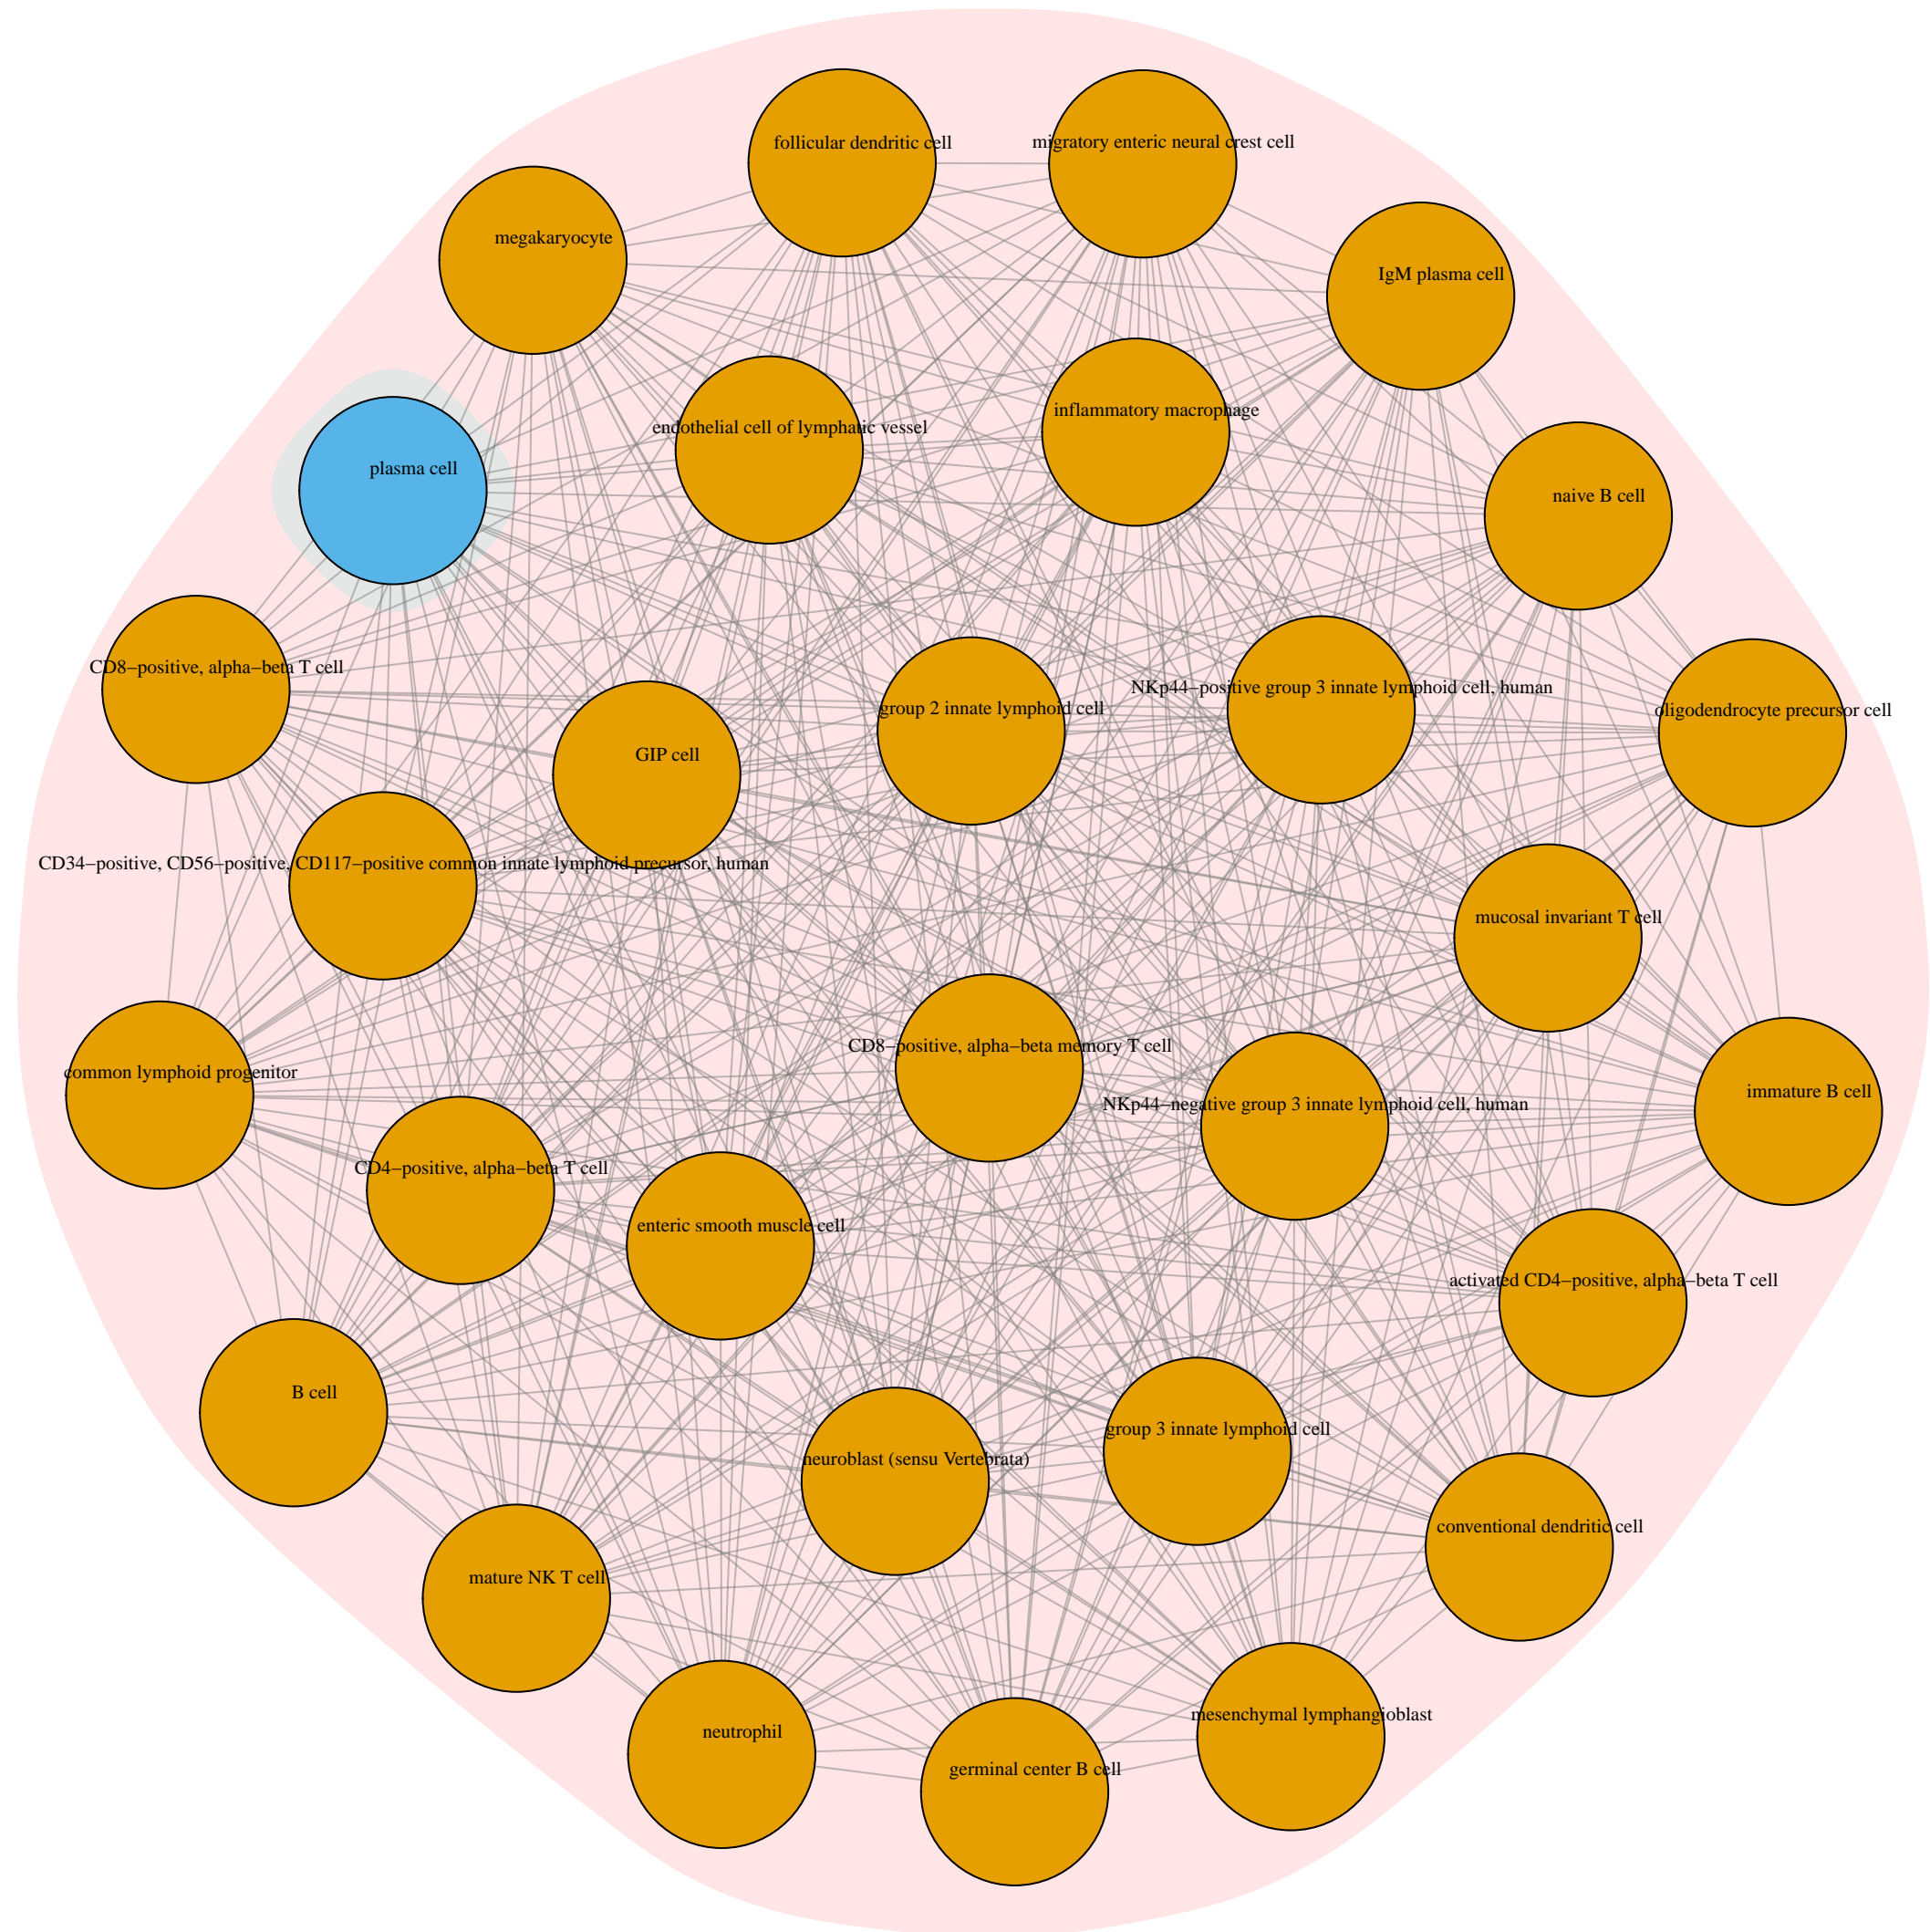

Supplement: supplementary_material [file network_top_connected.pdf › covarnet/network_top_connected.pdf]

# NMF rank survey

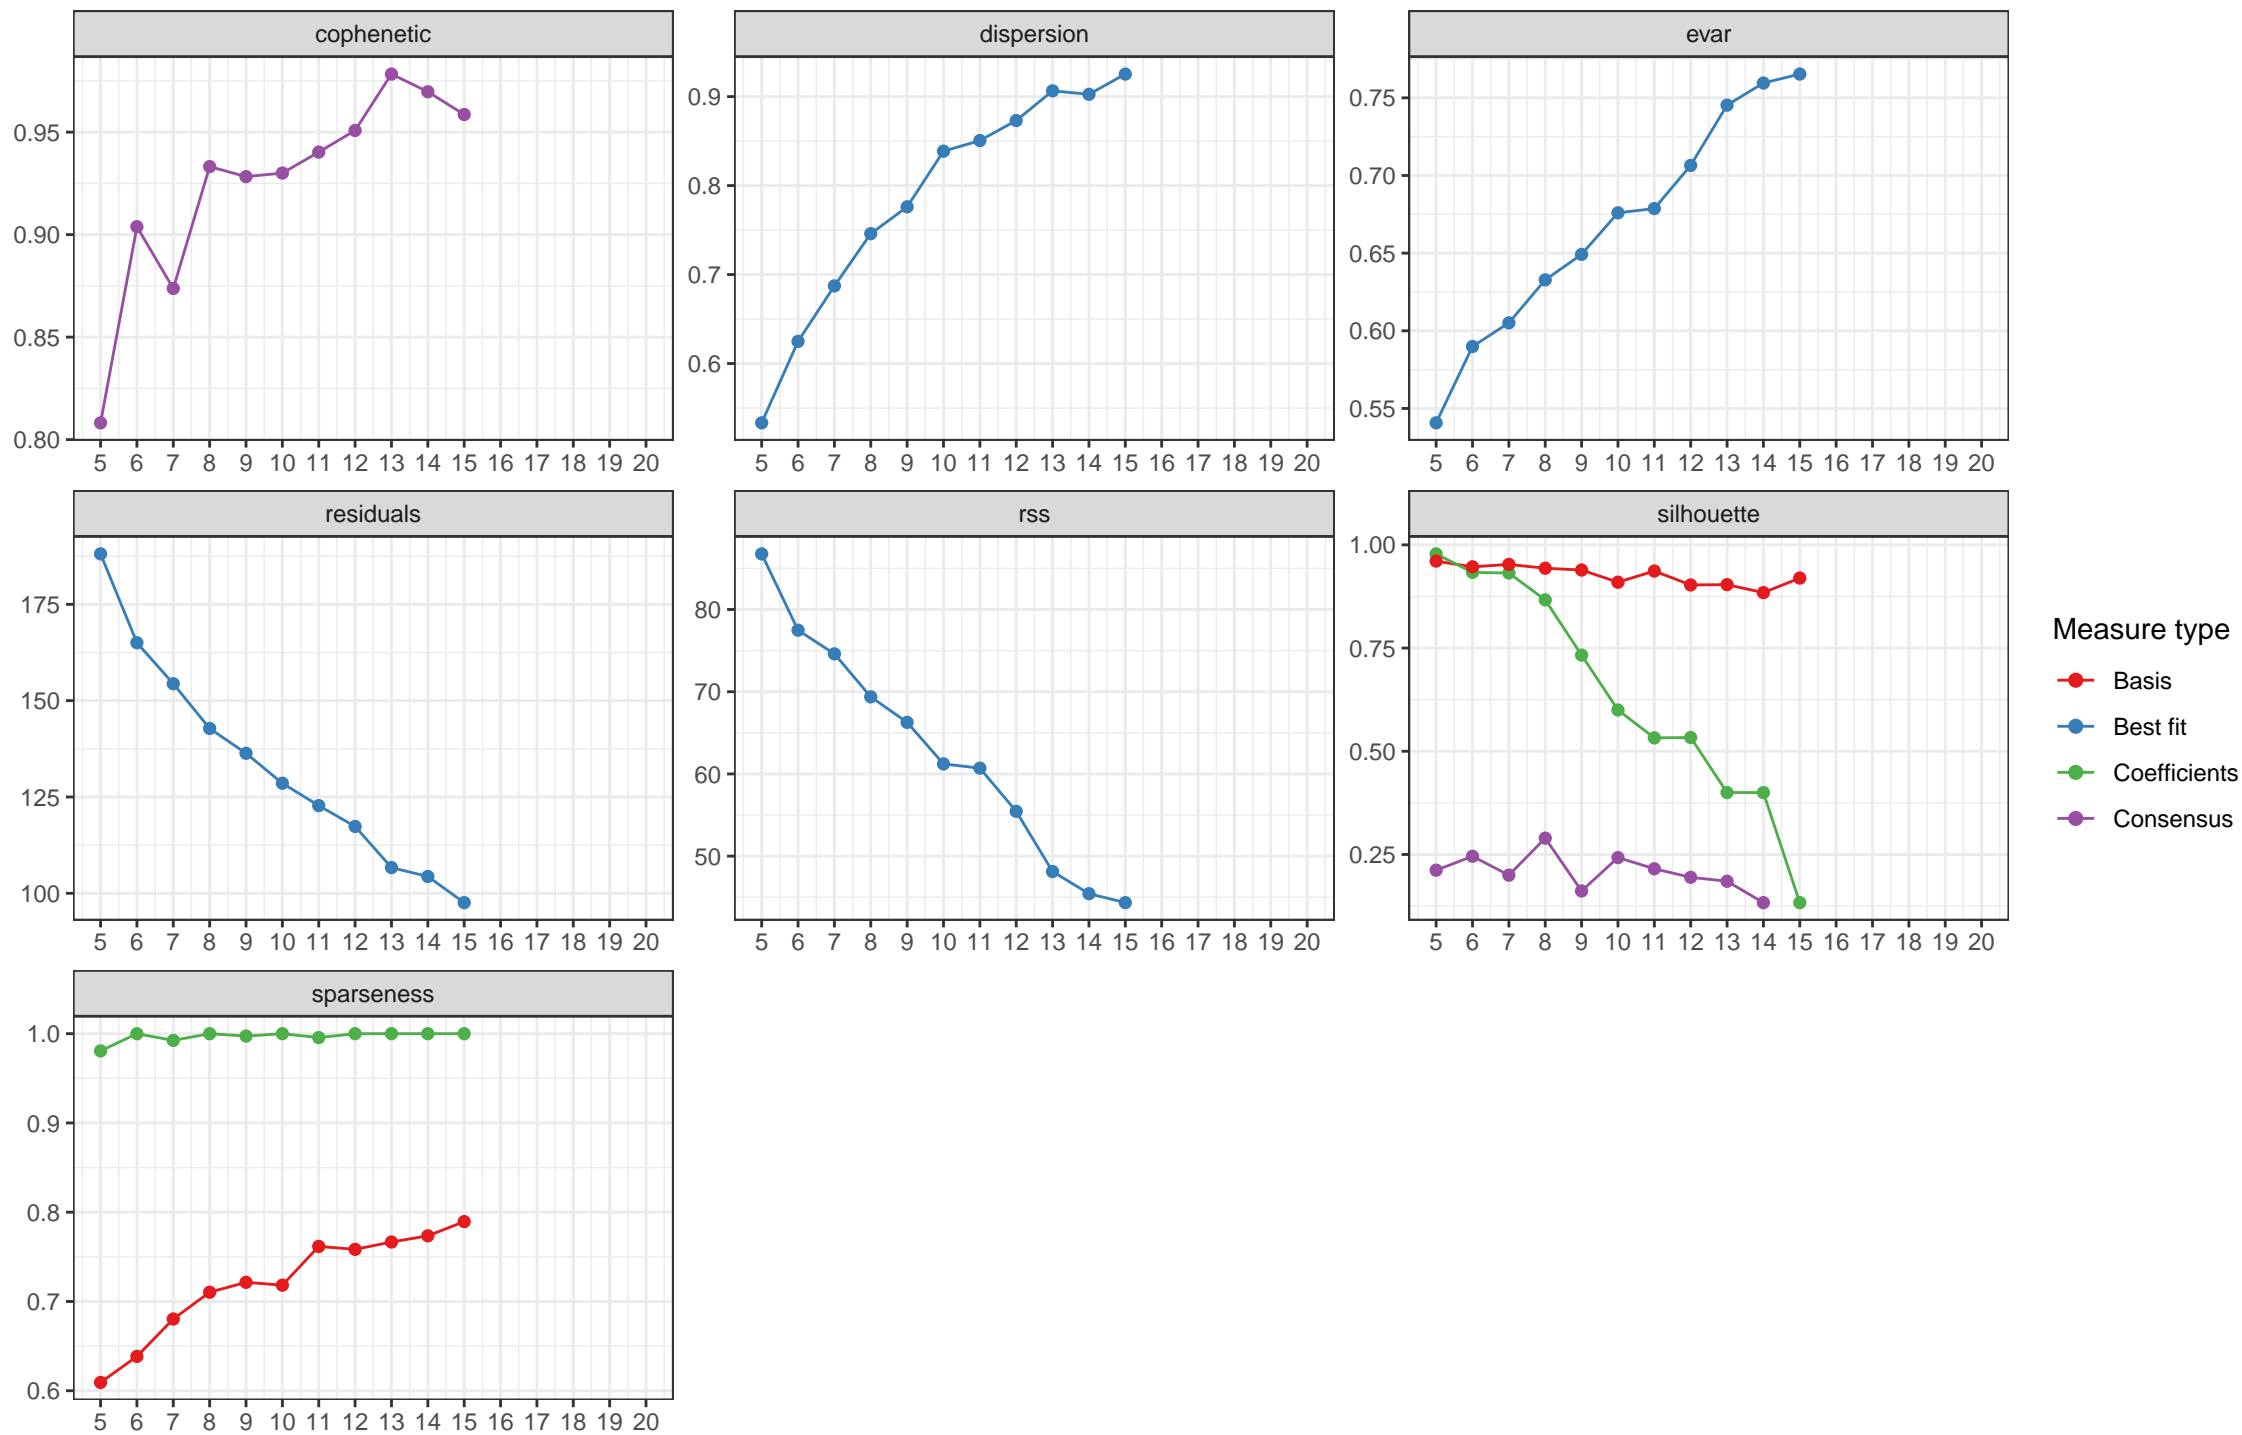

Factorization rank

Supplement: supplementary_material [file nmf_rank_selection_improved.pdf › covarnet/nmf_rank_selection_improved.pdf]

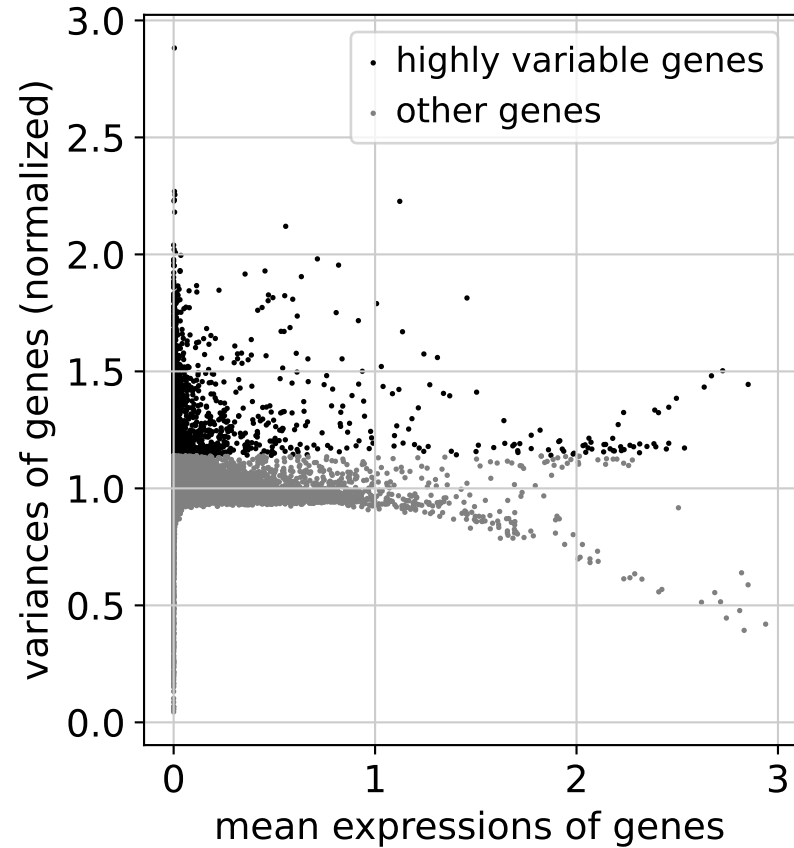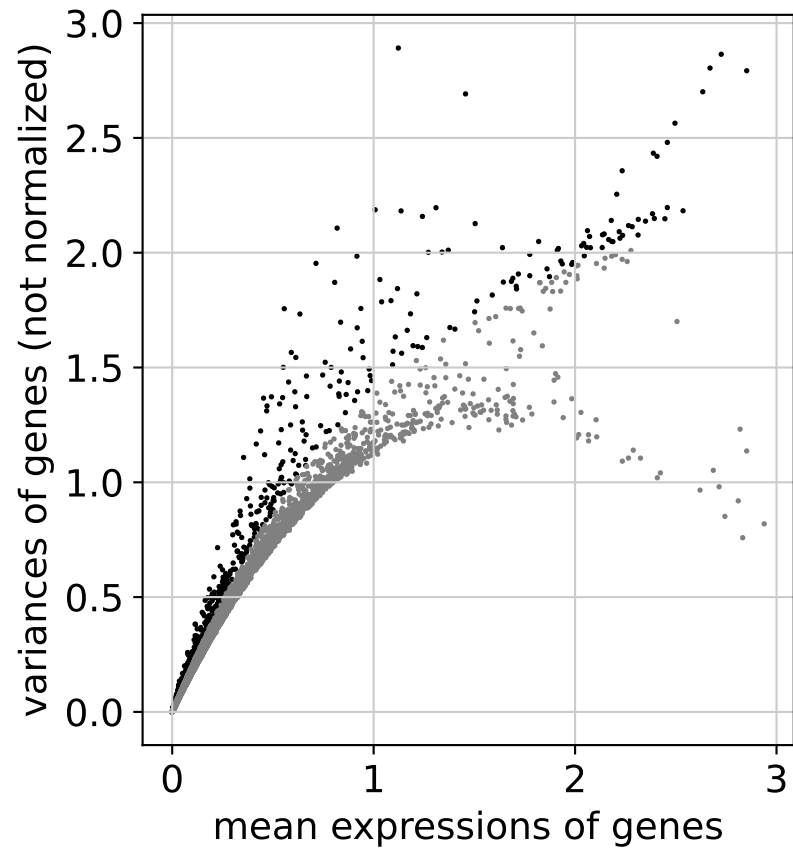

Supplement: supplementary_material [file filter_genes_dispersion_hvg.pdf › data_integration/results/filter_genes_dispersion_hvg.pdf]

pct counts mt

n\_genes\_by\_counts

2500

2000

1500

1000

500

1000

2000

3000

4000

total\_counts

0.1

0.075

0.05

0.025

0

-0.025

-0.05

-0.075

-0.1

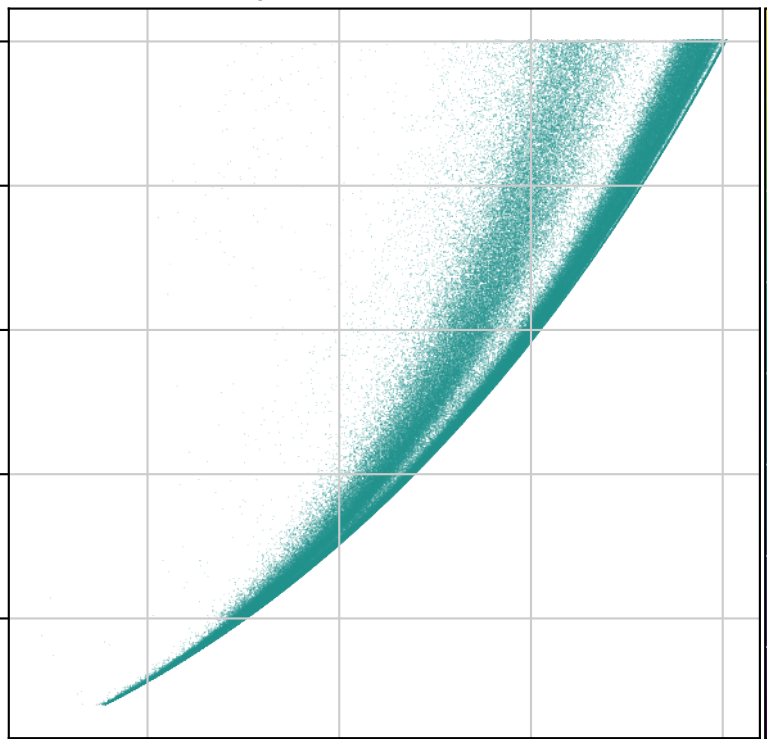

Supplement: supplementary_material [file scatter_qc_metrics_scatter.pdf › data_integration/results/scatter_qc_metrics_scatter.pdf]

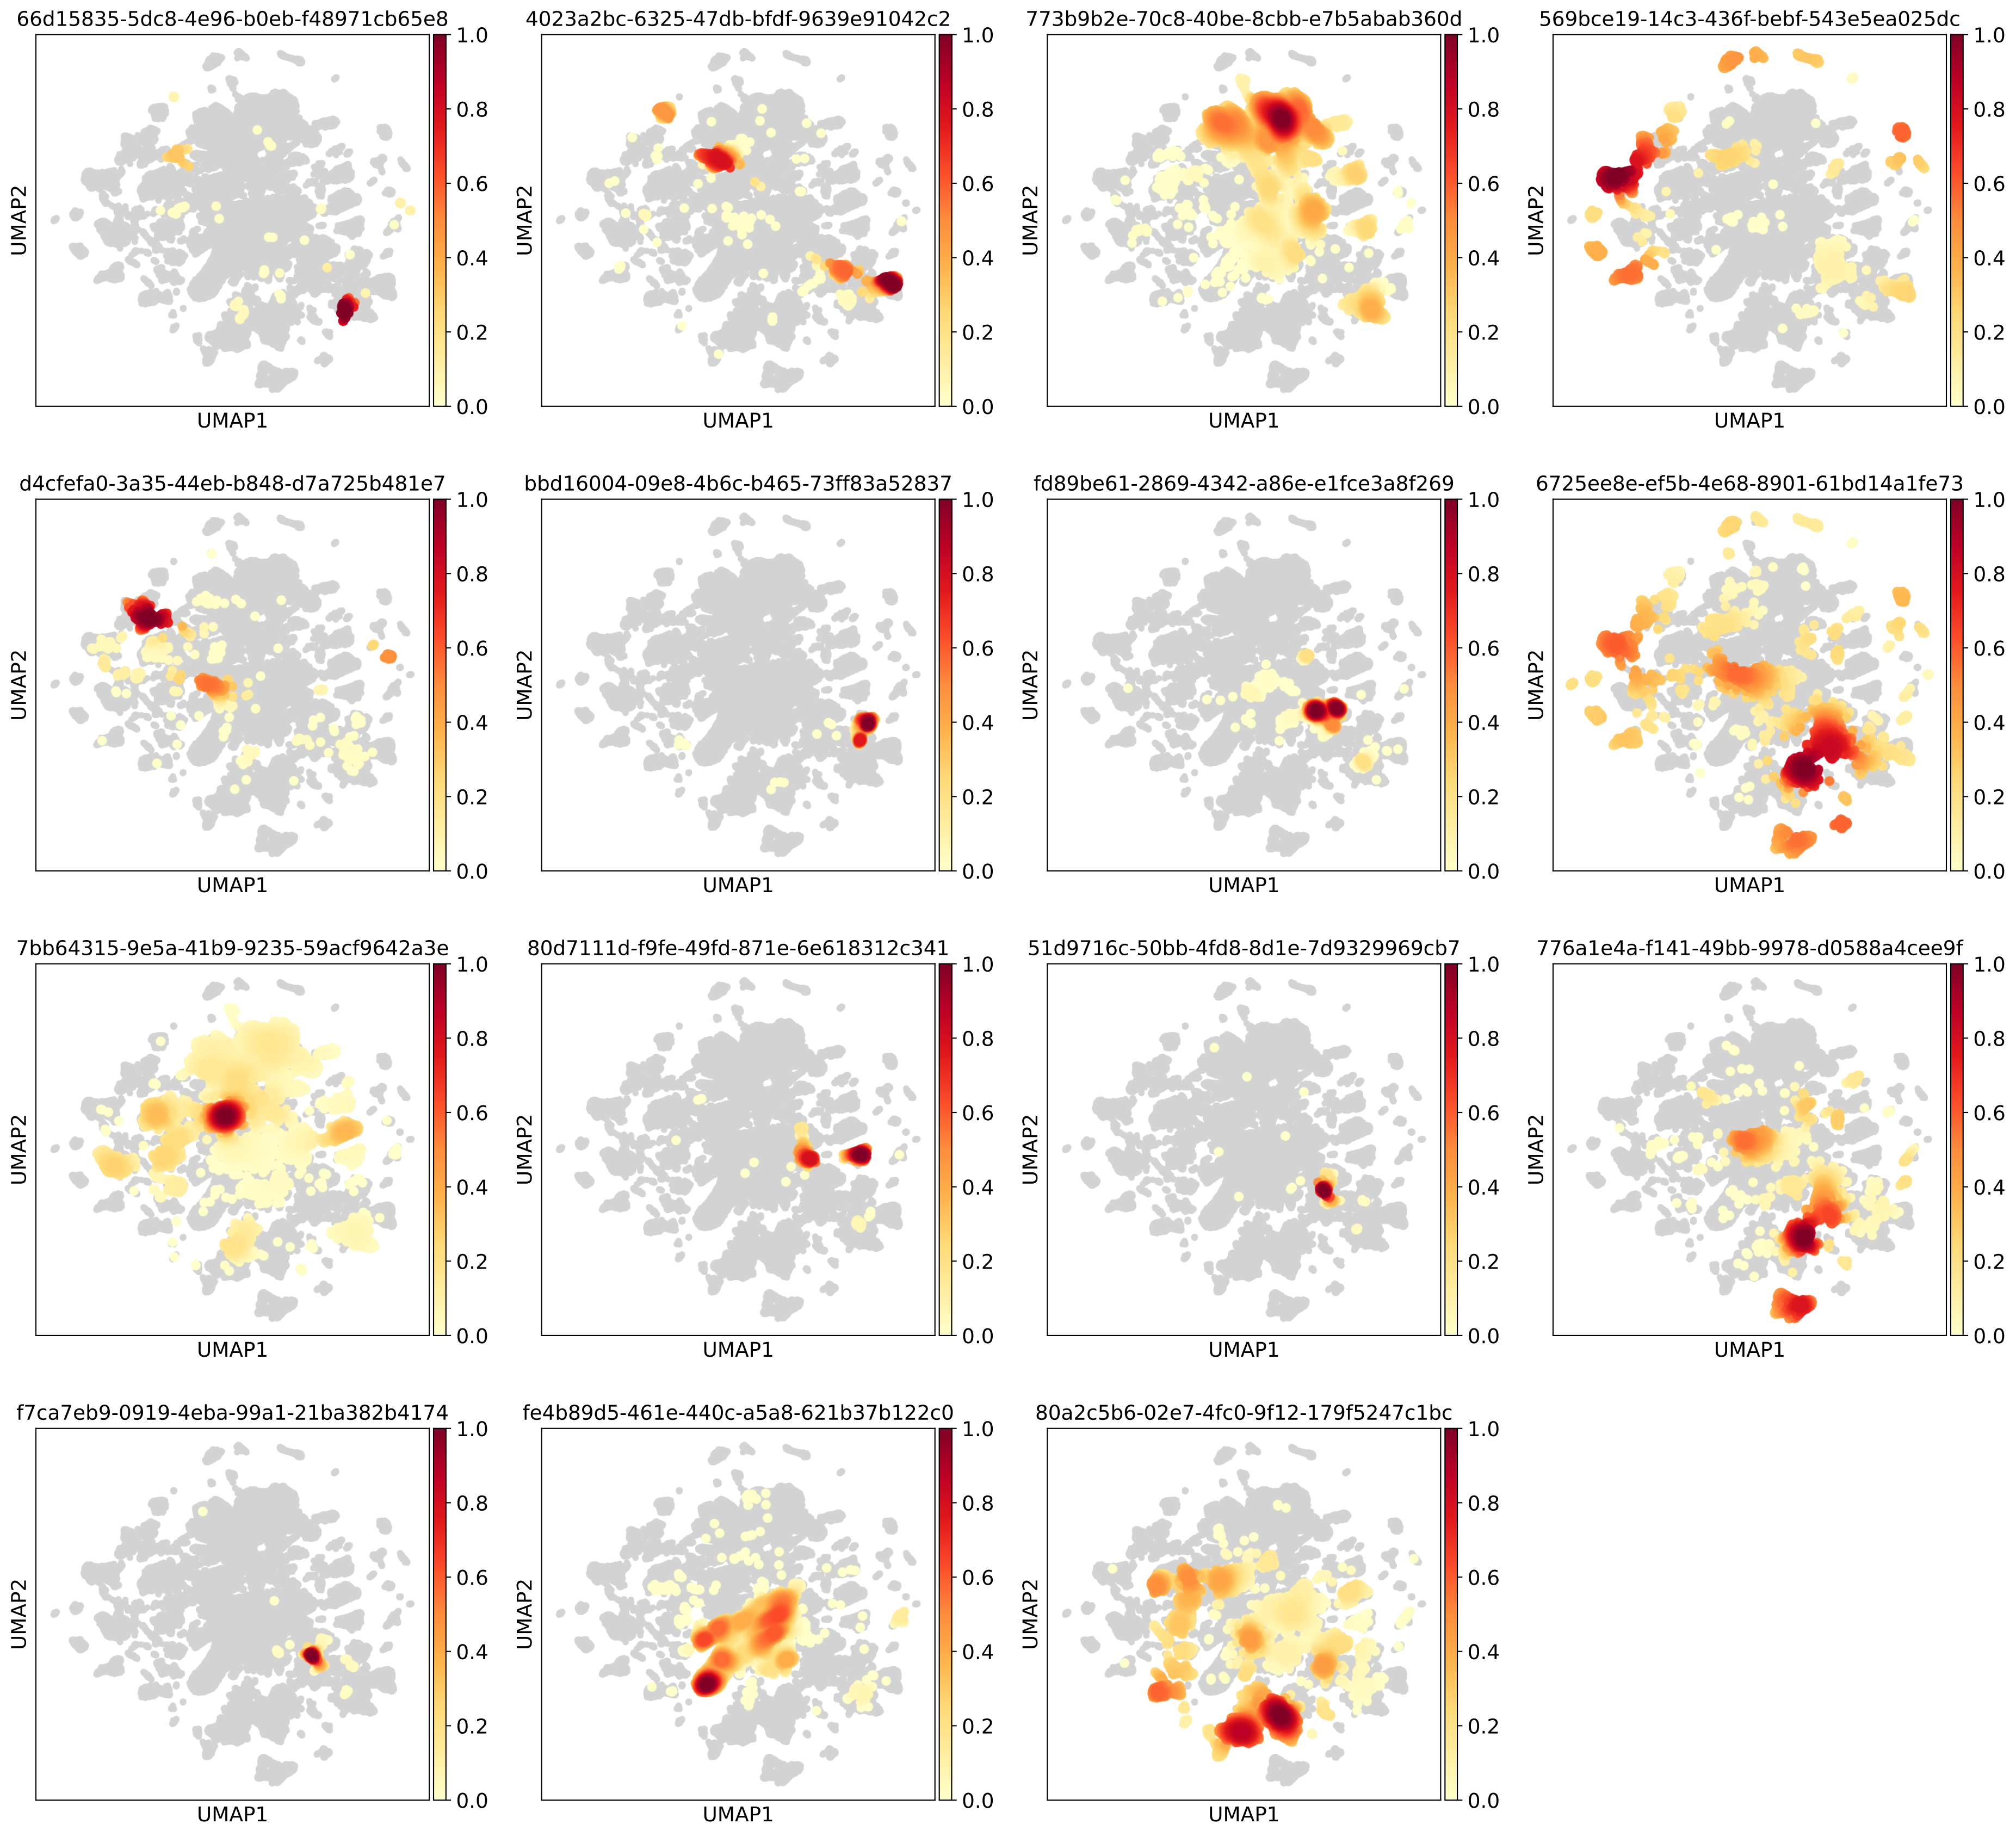

Supplement: supplementary_material [file umap_density_batch__batch_density.pdf › data_integration/results/umap_density_batch__batch_density.pdf]

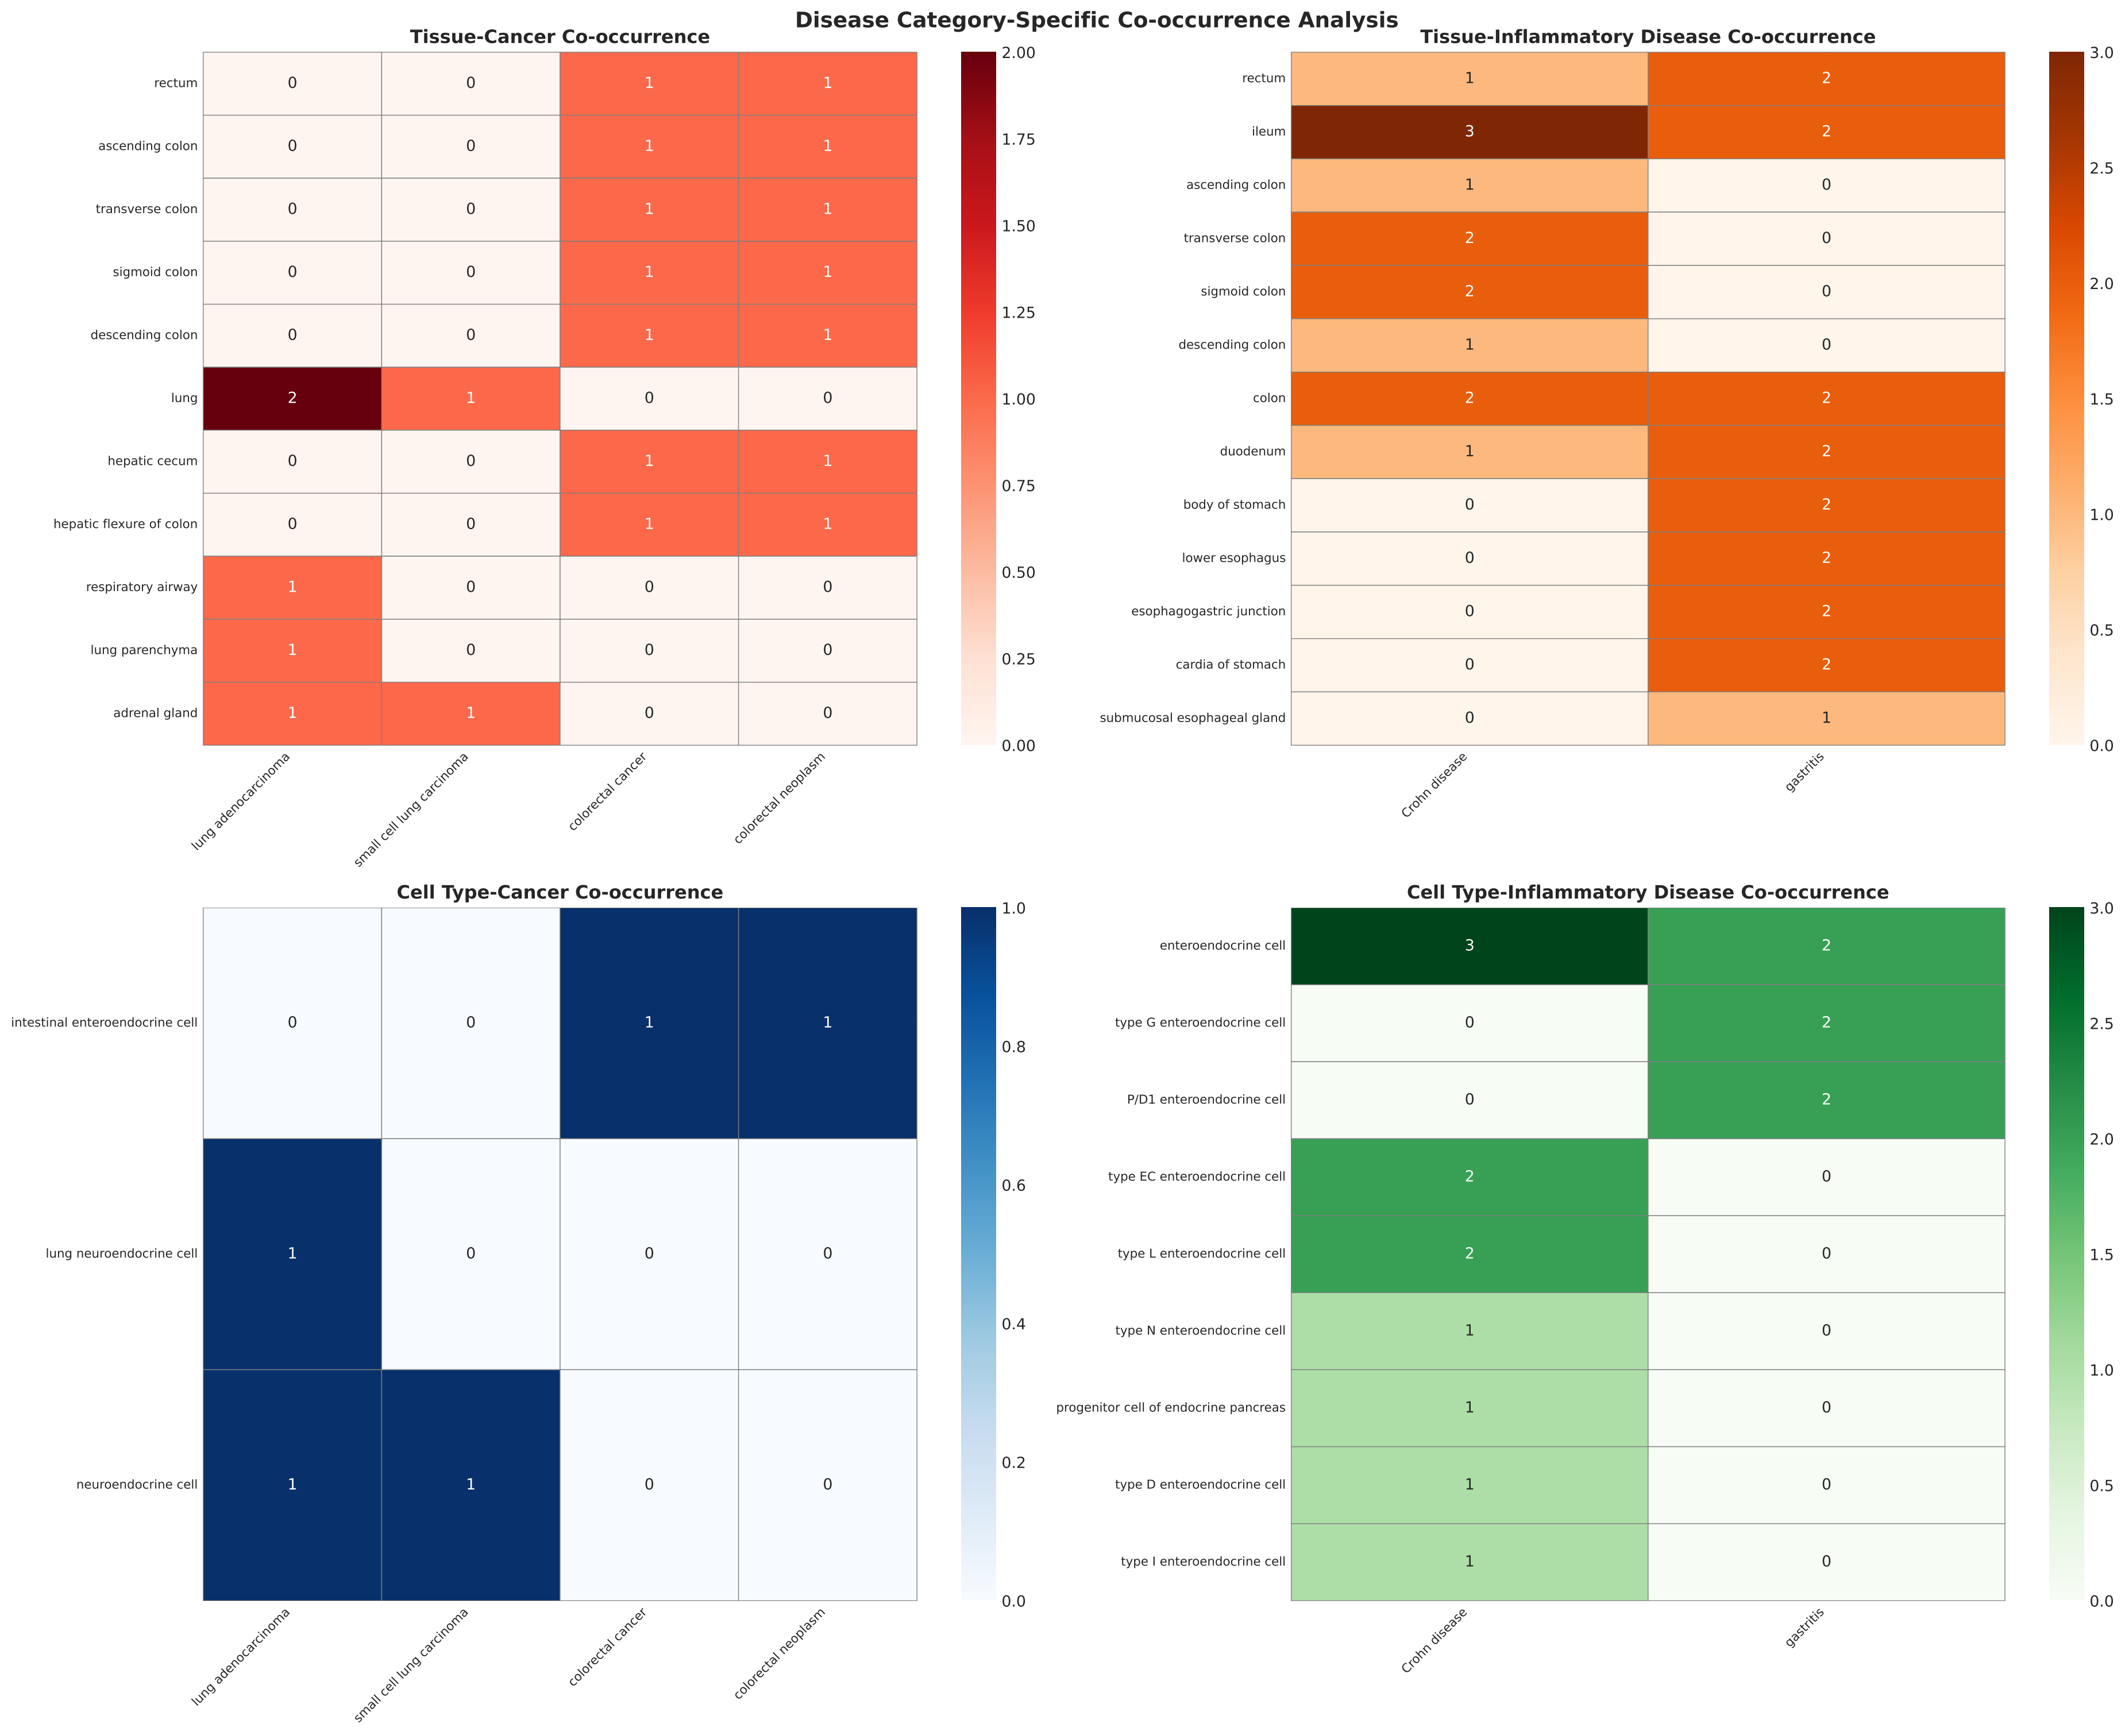

Supplement: supplementary_material [file disease_category_heatmaps.pdf › metadata/disease_category_heatmaps.pdf]

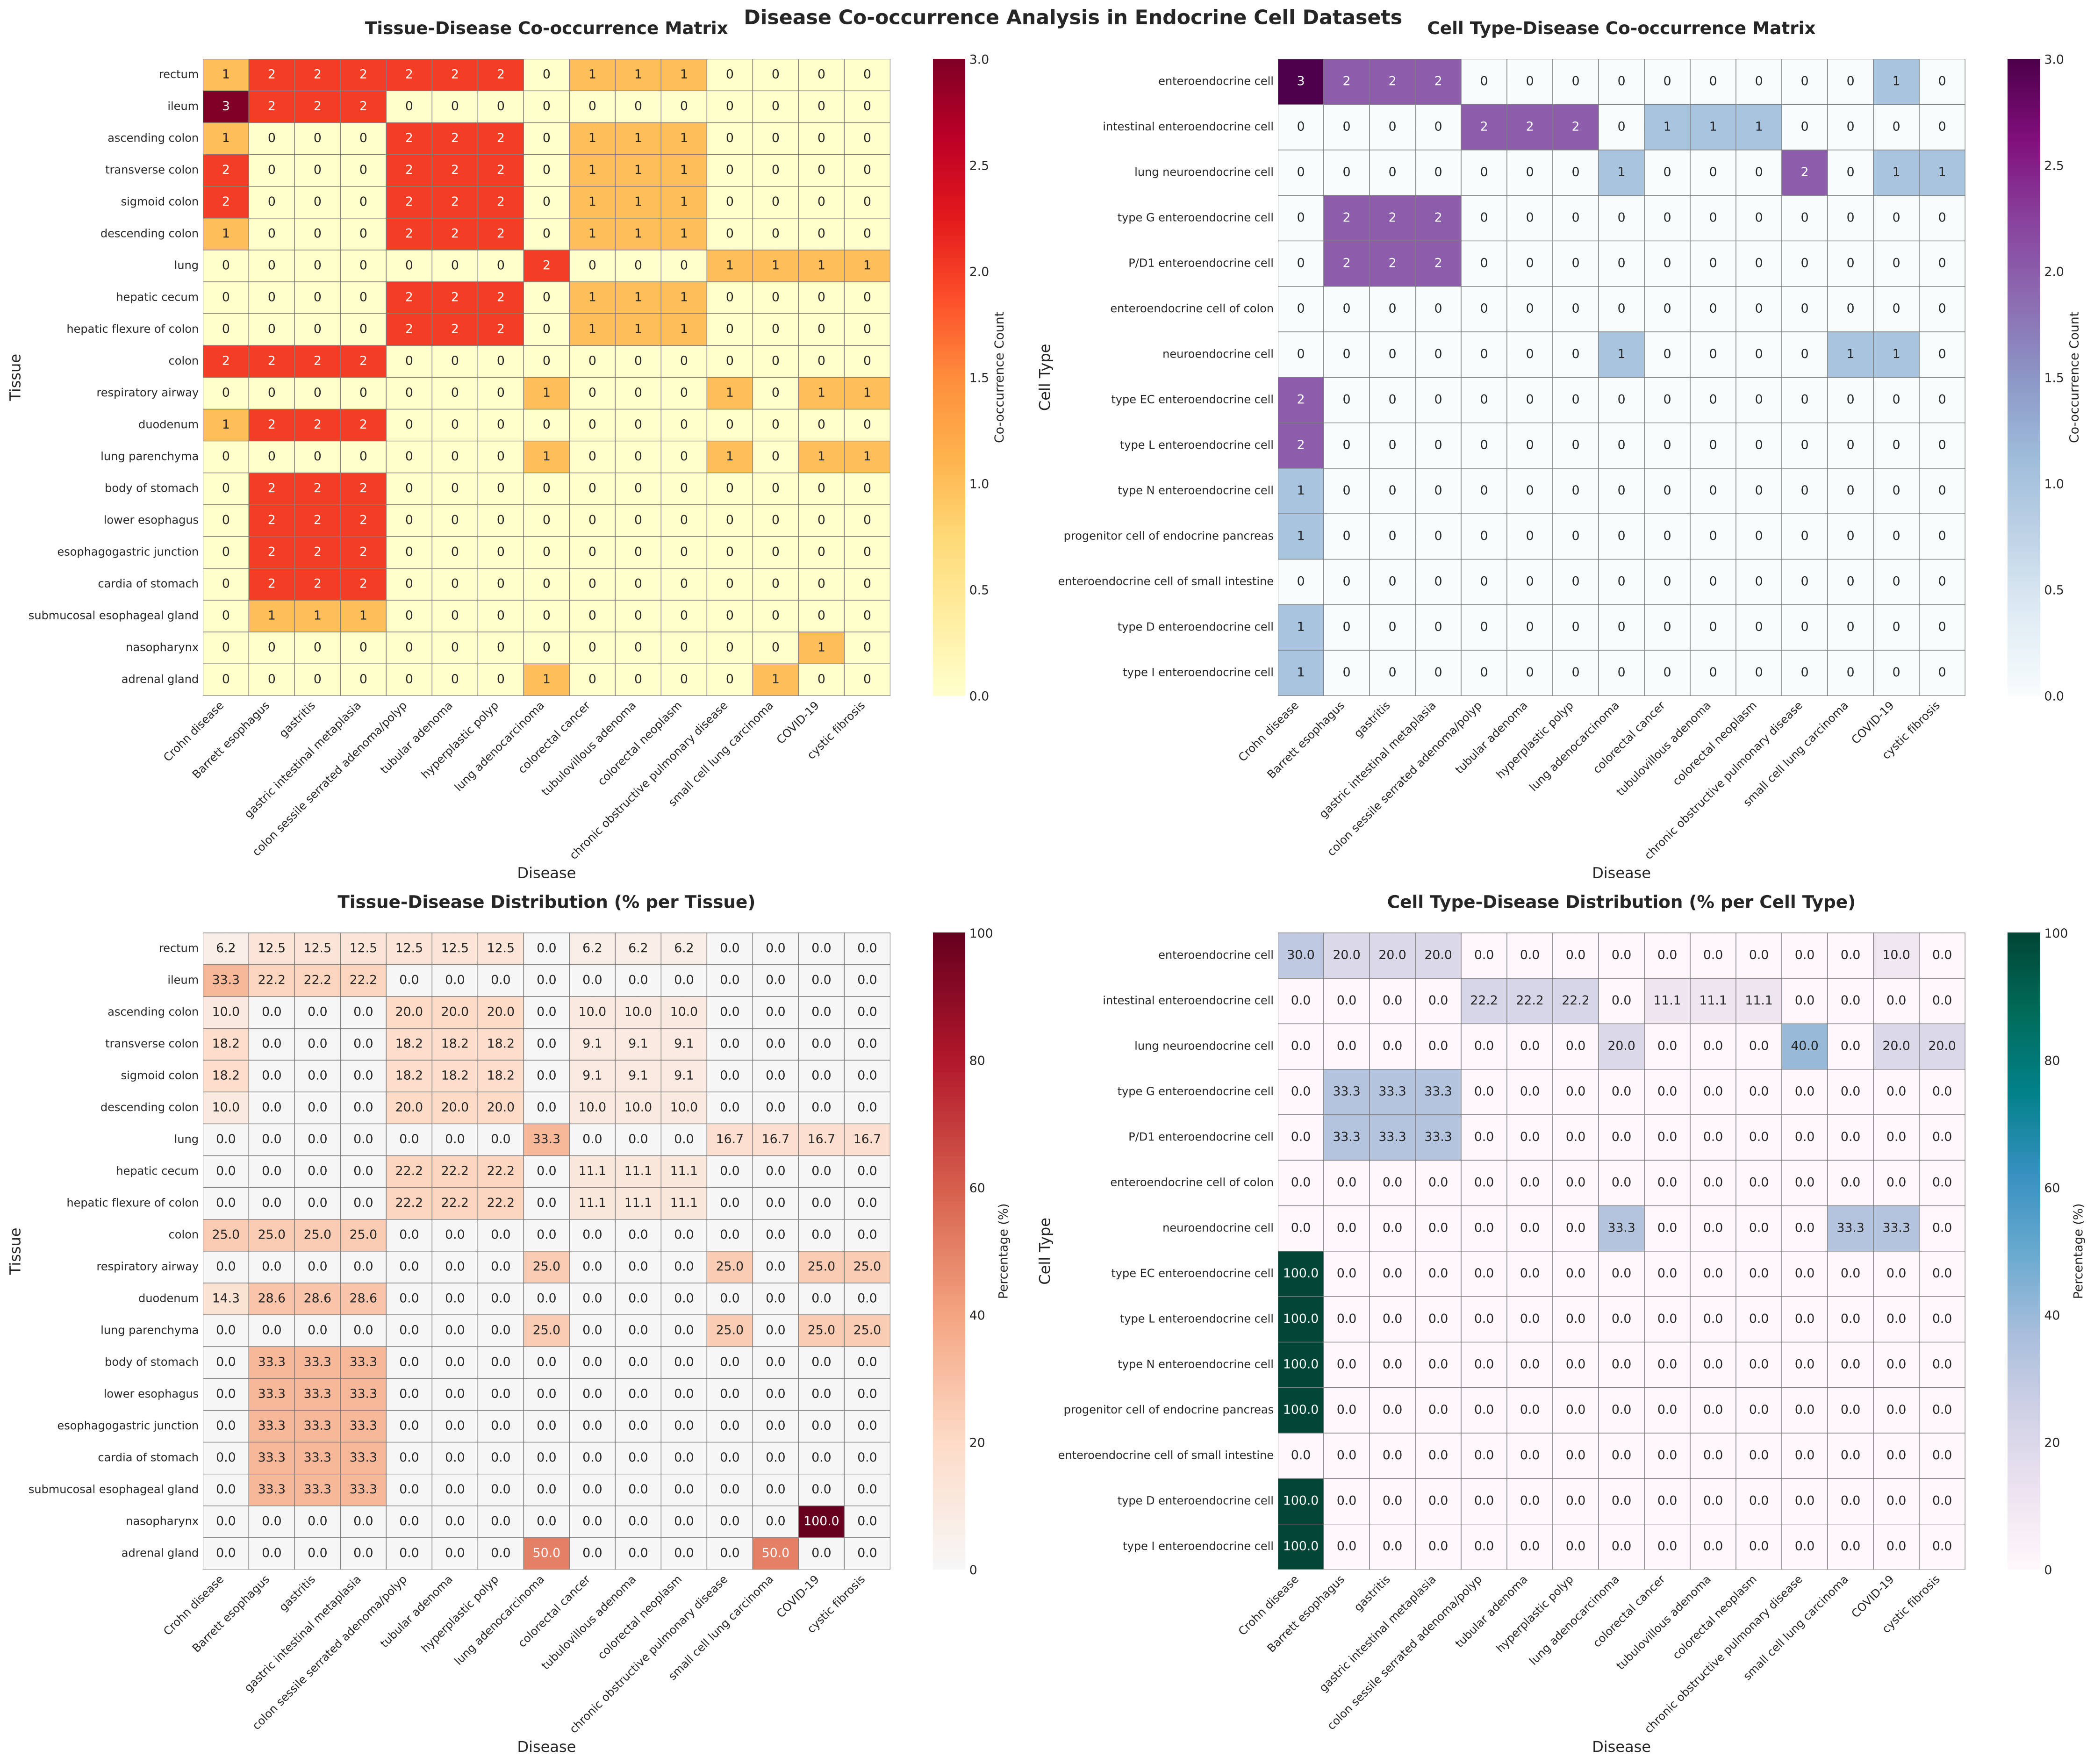

Supplement: supplementary_material [file disease_cooccurrence_heatmaps.pdf › metadata/disease_cooccurrence_heatmaps.pdf]

## GI vs Respiratory System Analysis

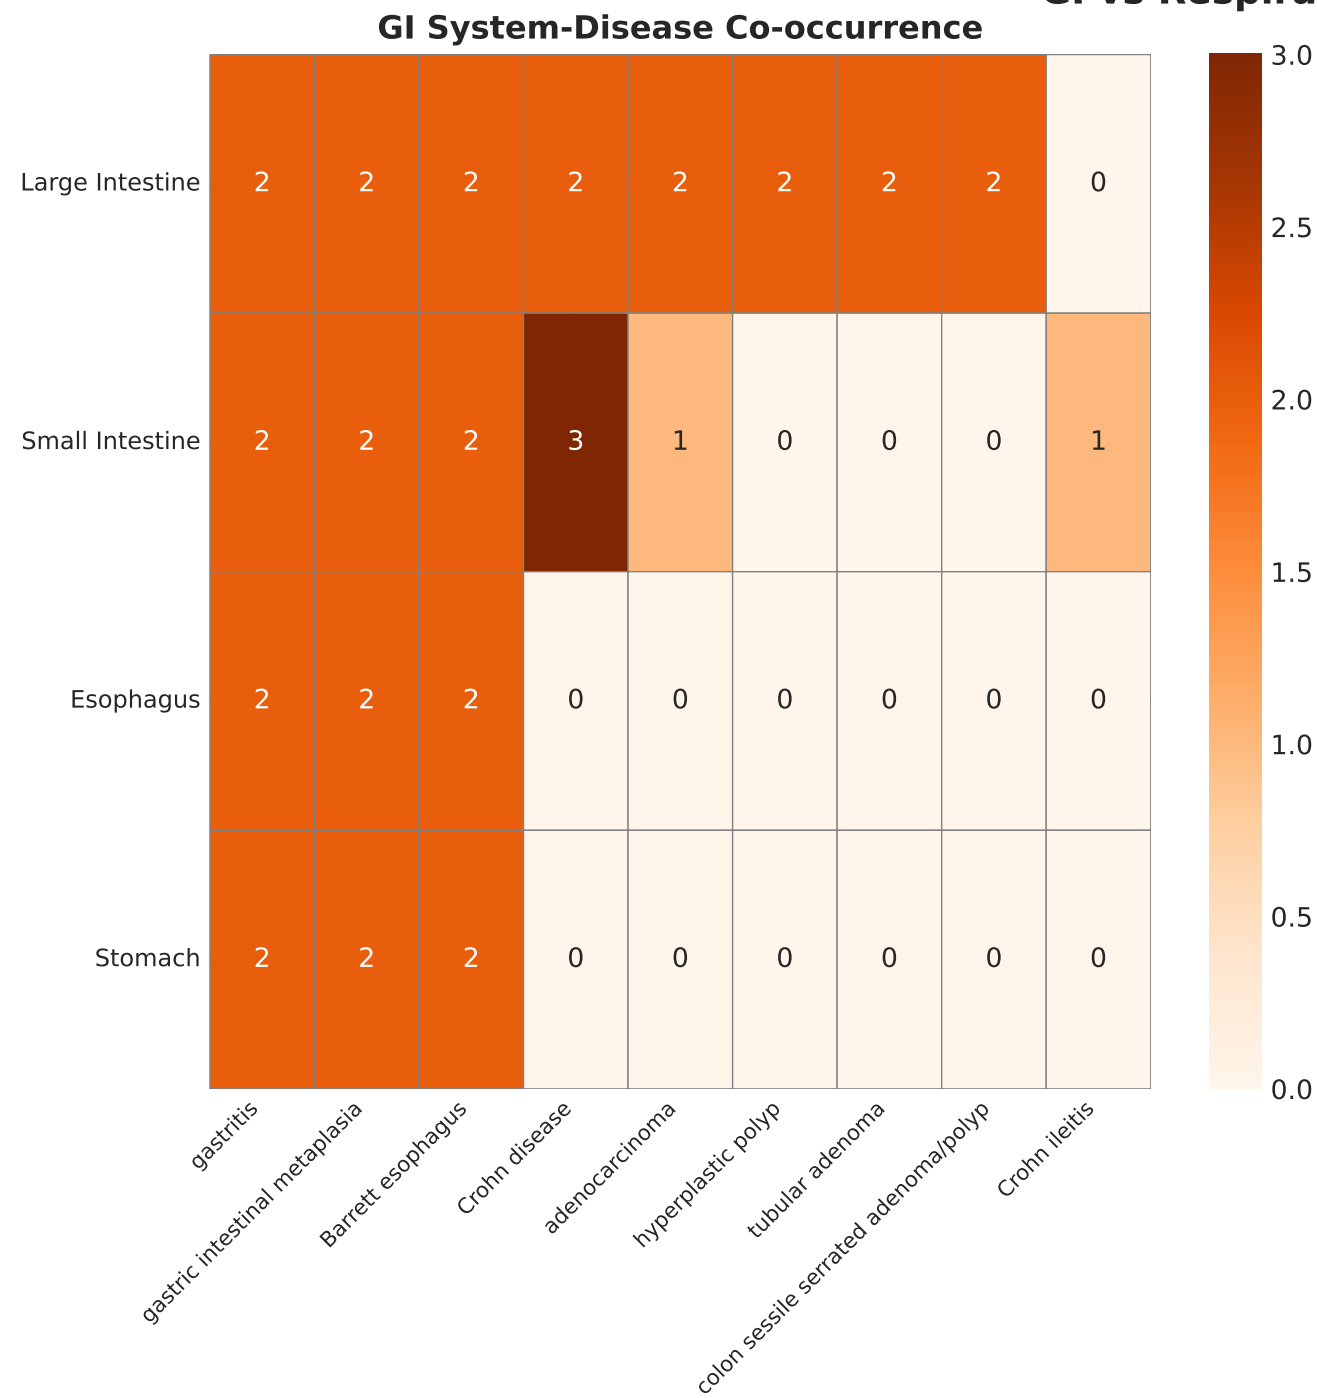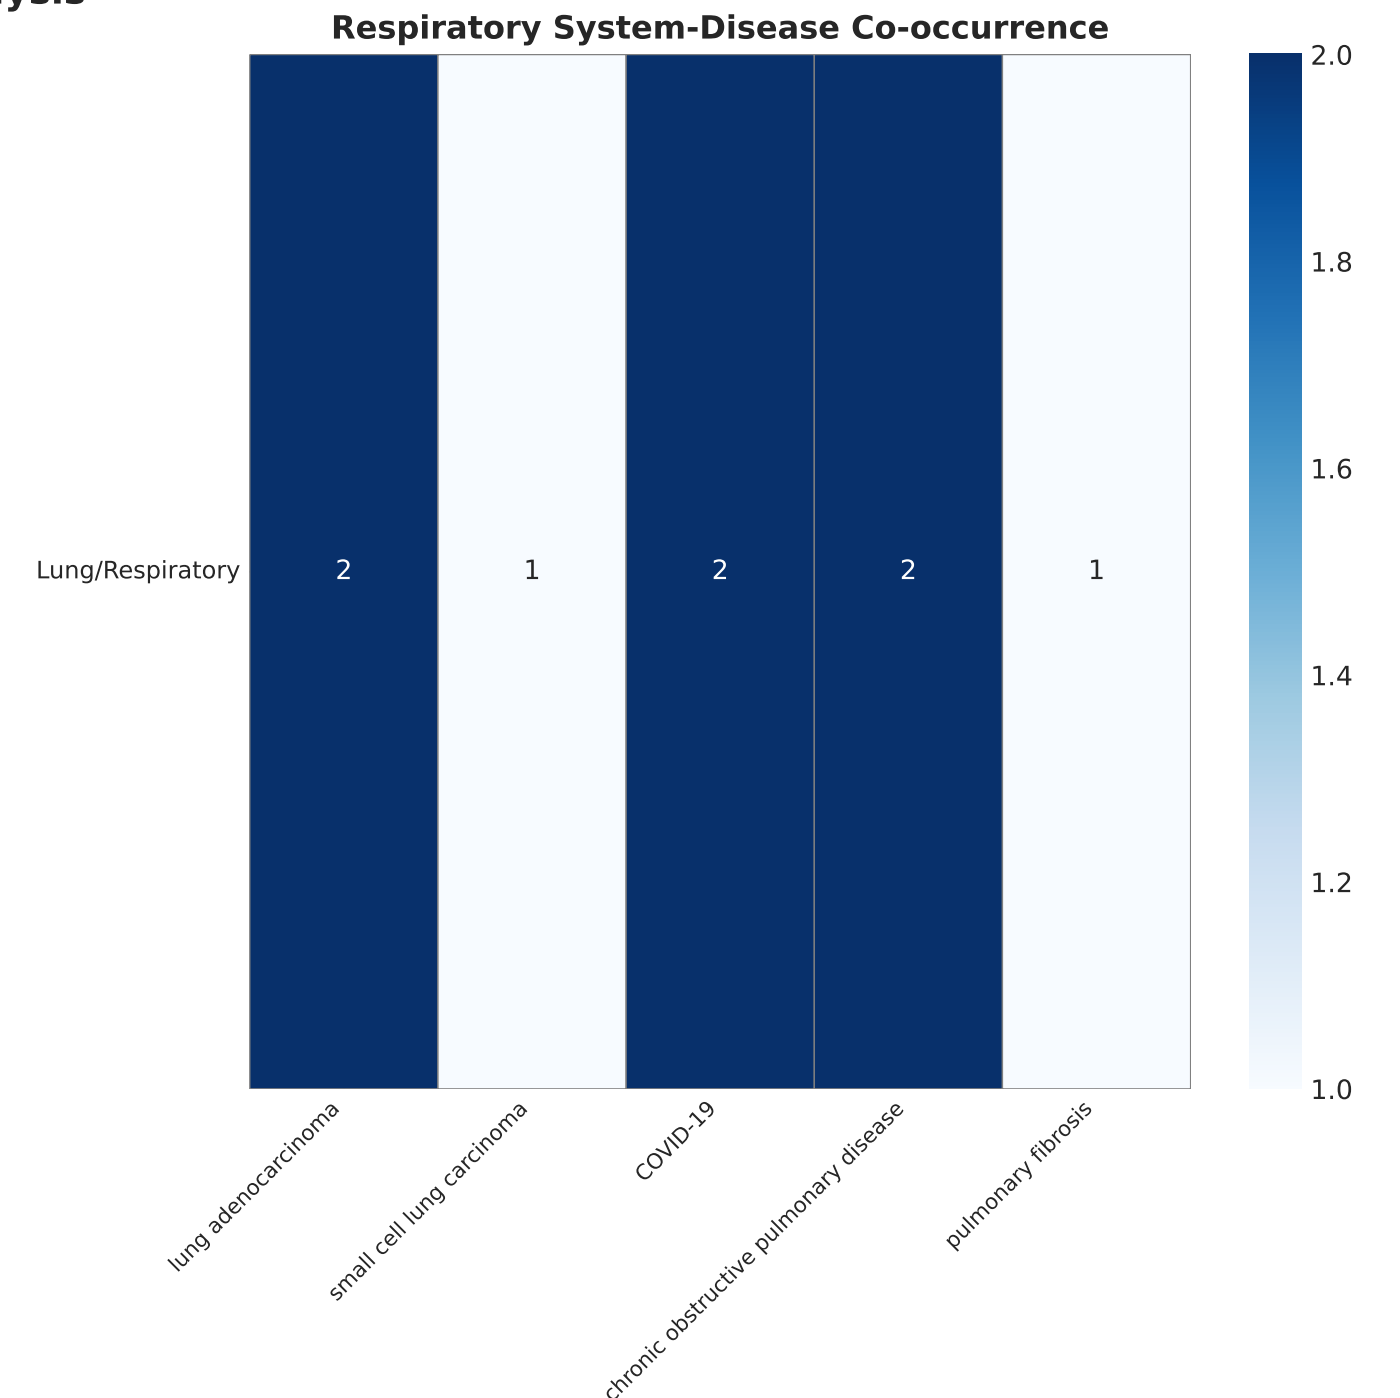

### Cell Types in GI System

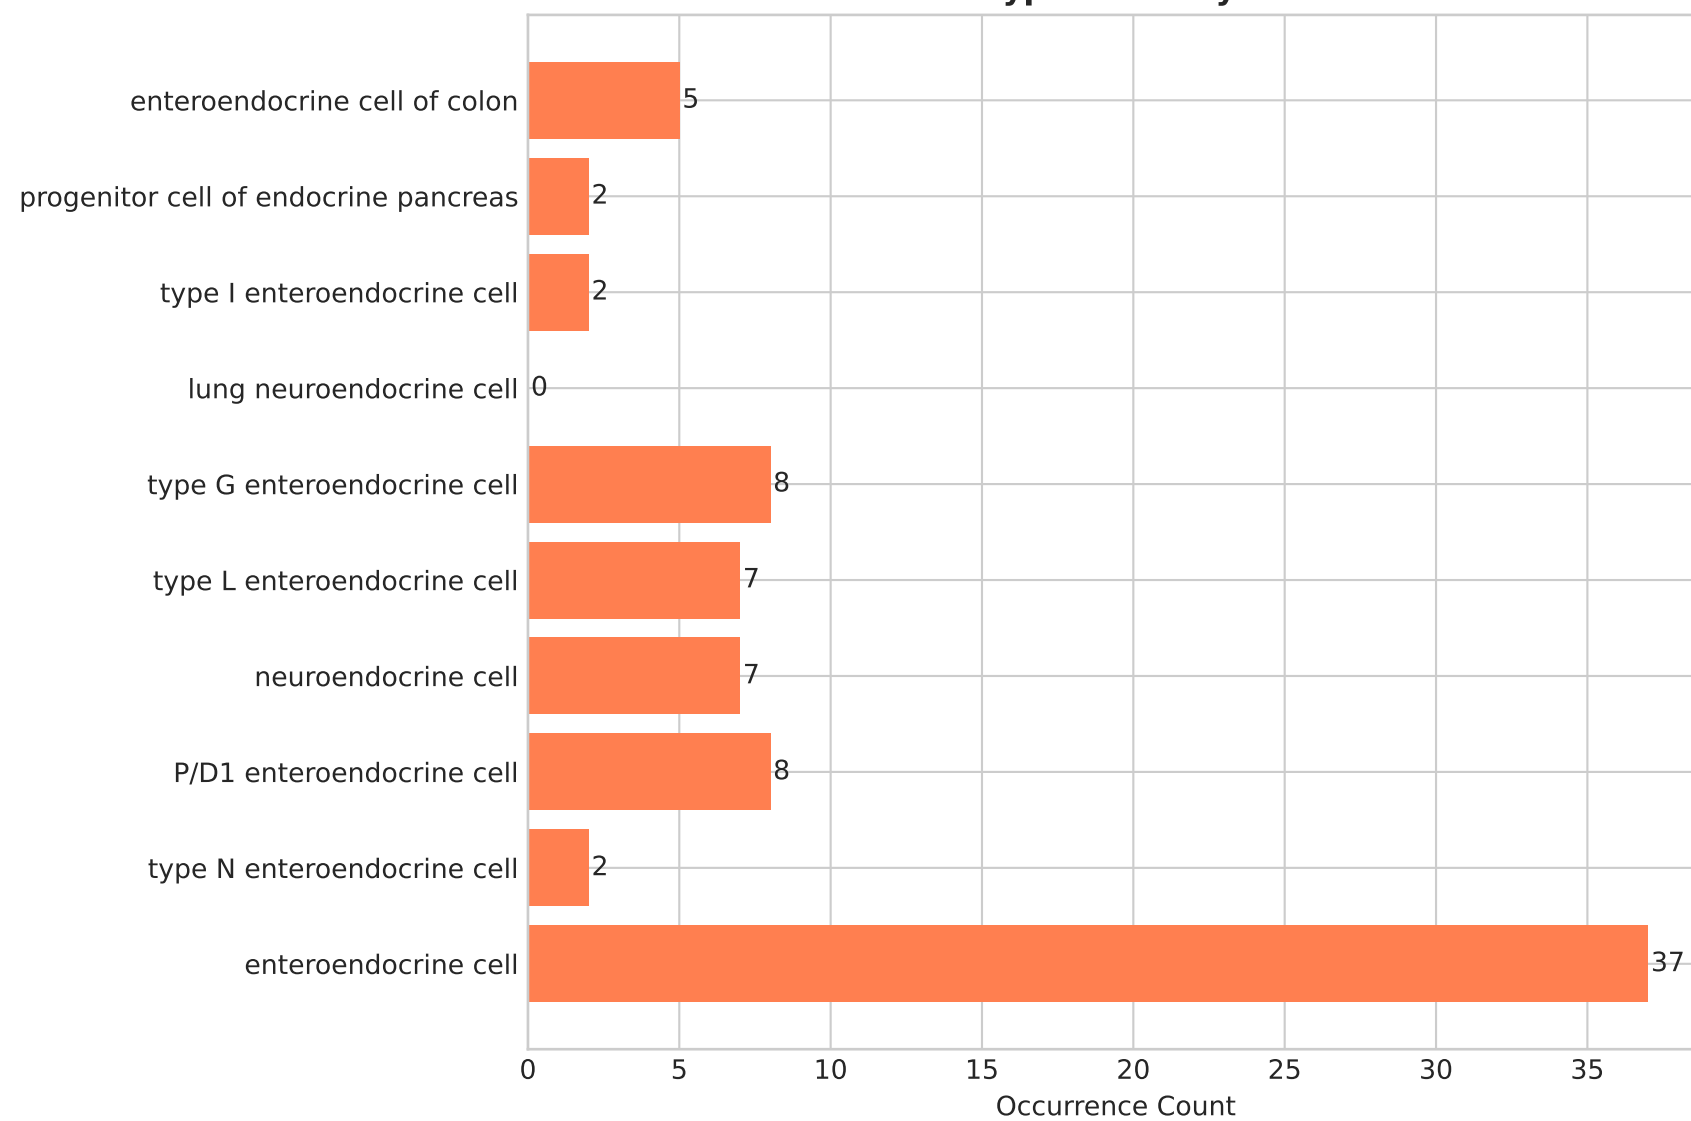

### Cell Types in Respiratory System

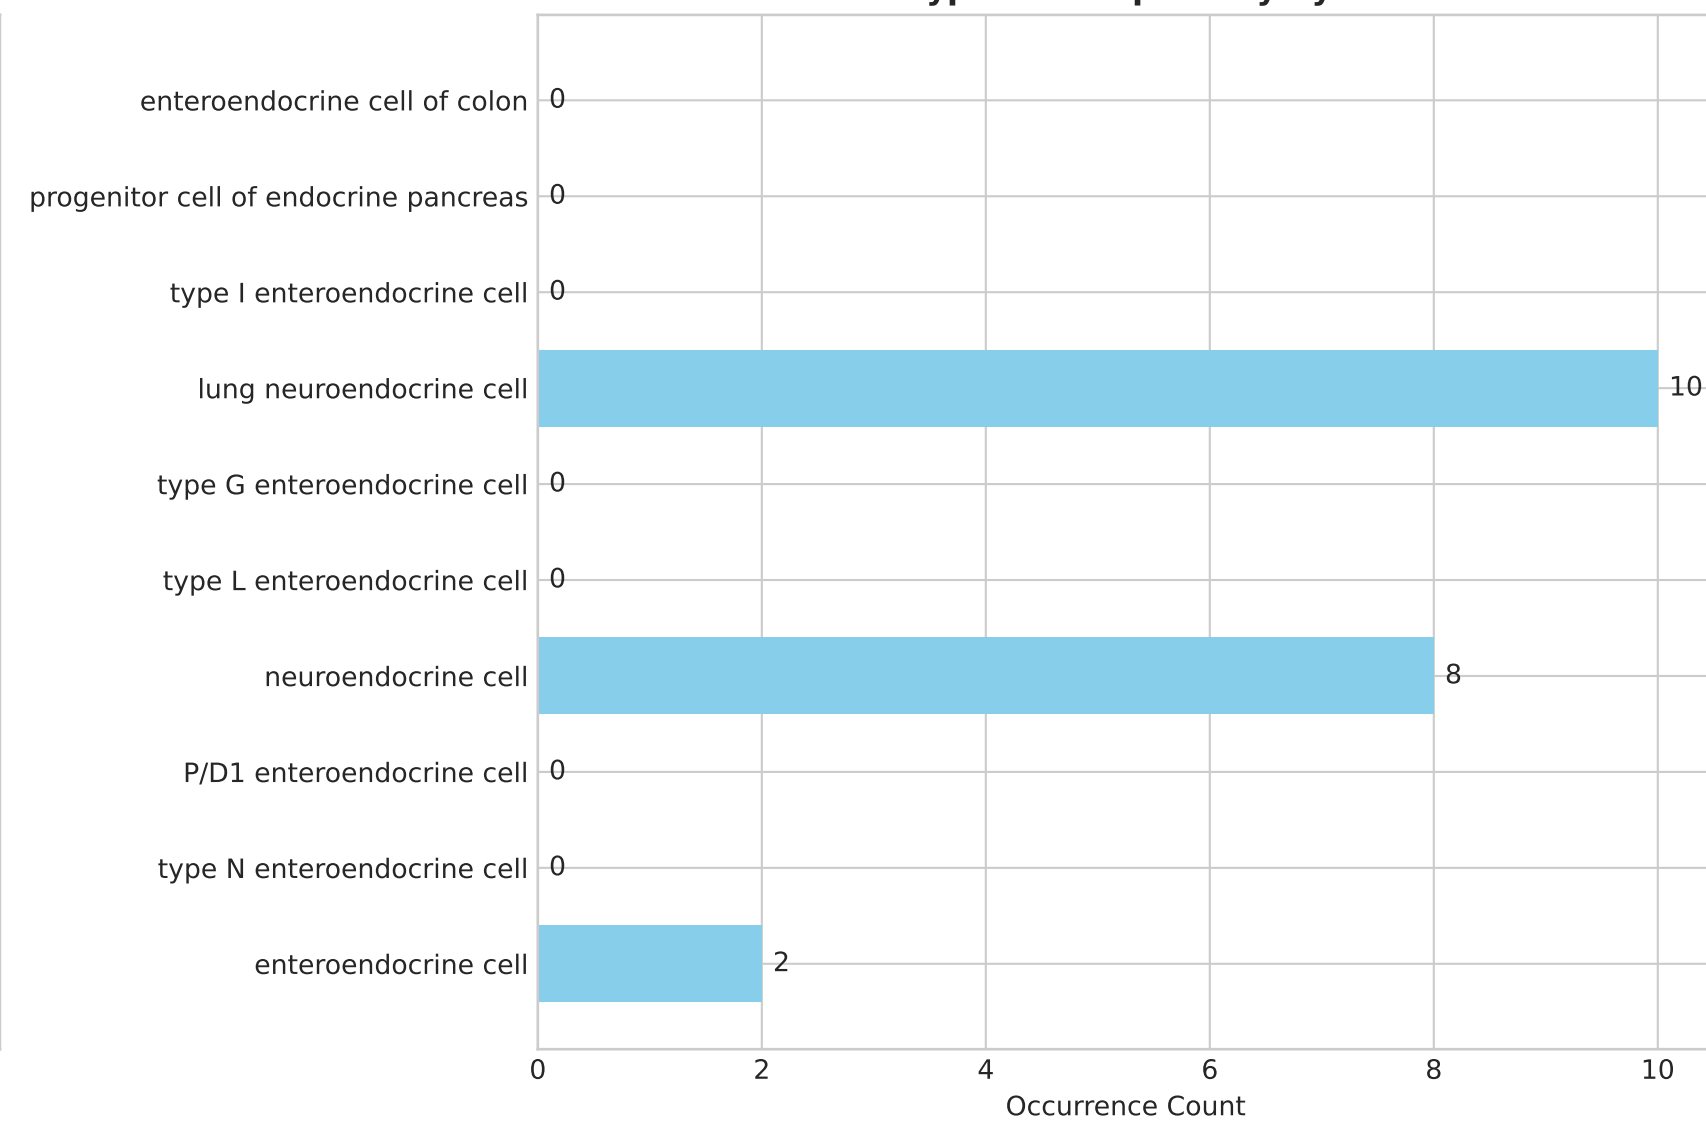

Supplement: supplementary_material [file gi_respiratory_comparison.pdf › metadata/gi_respiratory_comparison.pdf]
